# Supplementary material for: Inhibition of IRF4 in dendritic cells by PRR-independent and -dependent signals inhibit Th2 and promote Th17 responses
Source: eLife. 2020 Feb 4;9:e49416. doi: 10.7554/eLife.49416 (PMC7000221; doi:10.7554/eLife.49416)
Supplement: Supplementary file 1. — Supplementary Table 1: Genes altered by CPT treatment of cDC2 Table shows genes altered in CPT-treated splenic cDC2 cells. RNAseq data was analyzed by DESeq2 using a FDR < 0.05 multiple testing correction. Columns indicate gene symbol; chromosome; start and end positions of the gene; chromosome strand; stable Ensembl gene ID; description of gene; mean read counts for CPT-treated WT (CPT), untreated WT (UN), doxycycline-treated Irf4-/- (DOX), Irf4-/- (IRF4KO), and WT littermate (WT) cDC2 cells; fold change for CPT-treated versus untreated (FC); the log2-transformed fold change (log2FC); and the corrected p-value (FDR). Supplementary Table 2: Genes altered in Irf4-/- cDC2 Table shows genes altered in splenic cDC2 cells from Irf4-/- mice. RNAseq data was analyzed by DESeq2 using a FDR < 0.05 multiple testing correction. Columns indicate gene symbol; chromosome; start and end positions of the gene; chromosome strand; stable Ensembl gene ID; description of gene; mean read counts for CPT-treated WT (CPT), untreated WT (UN), doxycycline-treated Irf4-/- (DOX), Irf4-/- (IRF4KO), and WT littermate (WT) cDC2 cells; fold change for CPT-treated versus untreated (FC); the log2-transformed fold change (log2FC); and the corrected p-value (FDR). Supplementary Table 3: Genes altered in IRF4 overexpressing Irf4-/- cDC2 Table shows genes altered in splenic cDC2 cells from Irf4-/- mice that had been treated with doxycycline to over-express IRF4. RNAseq data was analyzed by DESeq2 using a FDR < 0.05 multiple testing correction. Columns indicate gene symbol; chromosome; start and end positions of the gene; chromosome strand; stable Ensembl gene ID; description of gene; mean read counts for CPT-treated WT (CPT), untreated WT (UN), doxycycline-treated Irf4-/- (DOX), Irf4-/- (IRF4KO), and WT littermate (WT) cDC2 cells; fold change for CPT-treated versus untreated (FC); the log2-transformed fold change (log2FC); and the corrected p-value (FDR). Supplementary Table 4: Transcription factor netw [file elife-49416-supp1.xlsx]

## Sheet: Table S1 CPT regulated genes
Table 1: Genes altered by both CPT treatment by DESeq2 using FDR<0.05
Probe	Chromosome	Start	End	Probe Strand		Feature	ID	Description	CPT	UN	DOX	IRF4KO	WT		FC [CPT/UN]	log2FC [CPT/UN]	FDR
St18	1	6487231	6860940	+		St18	ENSMUSG00000033740	suppression of tumorigenicity 18 [Source:MGI Symbol;Acc:MGI:2446700]	61.6667	8	7.33333	22.6667	24		7.70833	2.94642	2.08108e-05
Slco5a1	1	12866549	12992650	-		Slco5a1	ENSMUSG00000025938	solute carrier organic anion transporter family, member 5A1 [Source:MGI Symbol;Acc:MGI:2443431]	1672.33	139.667	187.667	630.333	2235.67		11.9737	3.5818	4.18299e-36
Ncoa2	1	13139105	13374083	-		Ncoa2	ENSMUSG00000005886	nuclear receptor coactivator 2 [Source:MGI Symbol;Acc:MGI:1276533]	2733	1431	2785	2656.67	4488.67		1.90985	0.933462	5.20624e-07
Terf1	1	15805646	15844052	+		Terf1	ENSMUSG00000025925	telomeric repeat binding factor 1 [Source:MGI Symbol;Acc:MGI:109634]	260.667	405	318.333	292	388		0.643621	-0.635716	0.00176252
Rdh10	1	16105774	16133734	+		Rdh10	ENSMUSG00000025921	retinol dehydrogenase 10 (all-trans) [Source:MGI Symbol;Acc:MGI:1924238]	183.333	331	161.333	146	263.333		0.553877	-0.852362	8.24499e-05
Jph1	1	16964560	17097889	-		Gm28376	ENSMUSG00000101640	predicted gene 28376 [Source:MGI Symbol;Acc:MGI:5579082]	108.333	7.33333	101.667	109.333	4.66667		14.7727	3.88486	1.75153e-11
Khdc1a	1	21349641	21352200	+		Khdc1a	ENSMUSG00000067750	KH domain containing 1A [Source:MGI Symbol;Acc:MGI:2676610]	6.66667	67.6667	0	0.333333	3.66667		0.0985222	-3.34341	2.44494e-08
Khdc1c	1	21368331	21370845	+		Khdc1c	ENSMUSG00000041722	KH domain containing 1C [Source:MGI Symbol;Acc:MGI:3583007]	0	28	0	0	0		0	#NUM!	4.96716e-06
Khdc1b	1	21383556	21386373	+		Khdc1b	ENSMUSG00000085079	KH domain containing 1B [Source:MGI Symbol;Acc:MGI:2138477]	0.666667	24.6667	0	0	2		0.027027	-5.20945	0.00048396
Dst	1	33908225	34308661	+		Dst	ENSMUSG00000026131	dystonin [Source:MGI Symbol;Acc:MGI:104627]	1477	460.333	379.333	416.667	1157.67		3.20854	1.68192	9.70382e-12
Gm26788	1	34165856	34178446	-		Dst	ENSMUSG00000026131	dystonin [Source:MGI Symbol;Acc:MGI:104627]	23	6	3.66667	3.33333	14.6667		3.83333	1.9386	0.0305795
Gm37233	1	34427002	34433264	-		Gm37233	ENSMUSG00000102336	predicted gene, 37233 [Source:MGI Symbol;Acc:MGI:5610461]	95	22.6667	70.6667	35.3333	98.3333		4.19118	2.06736	0.000489471
Ccdc115	1	34436670	34439672	-		Ccdc115	ENSMUSG00000042111	coiled-coil domain containing 115 [Source:MGI Symbol;Acc:MGI:1916918]	335.333	459.667	749.333	648	679		0.729514	-0.454992	0.0263174
Arhgef4	1	34678188	34813309	+		Arhgef4	ENSMUSG00000037509	Rho guanine nucleotide exchange factor (GEF) 4 [Source:MGI Symbol;Acc:MGI:2442507]	109.333	206	127	156.667	206.667		0.530744	-0.913911	0.00436086
Plekhb2	1	34849976	34879580	+		Plekhb2	ENSMUSG00000026123	pleckstrin homology domain containing, family B (evectins) member 2 [Source:MGI Symbol;Acc:MGI:2385825]	1765	1165.67	3052.33	3649	3814.33		1.51416	0.598513	5.32349e-05
Gm33280	1	36132042	36138746	+		Gm33280	ENSMUSG00000102202	predicted gene, 33280 [Source:MGI Symbol;Acc:MGI:5592439]	25.3333	64.3333	13.6667	10.6667	26.3333		0.393782	-1.34453	0.0367782
Sema4c	1	36548639	36558349	-		Sema4c	ENSMUSG00000026121	sema domain, immunoglobulin domain (Ig), transmembrane domain (TM) and short cytoplasmic domain, (semaphorin) 4C [Source:MGI Symbol;Acc:MGI:109252]	753	178.667	505.333	461.667	707.667		4.21455	2.07538	1.72695e-08
D430040D24Rik	1	36557701	36565613	+		Sema4c	ENSMUSG00000026121	sema domain, immunoglobulin domain (Ig), transmembrane domain (TM) and short cytoplasmic domain, (semaphorin) 4C [Source:MGI Symbol;Acc:MGI:109252]	108.667	10	20.6667	23.3333	49.3333		10.8667	3.44184	4.39566e-05
Fam178b	1	36562692	36683183	-		D430040D24Rik	ENSMUSG00000087589	RIKEN cDNA D430040D24 gene [Source:MGI Symbol;Acc:MGI:2442526]	319.667	2.66667	12	99.6667	72		119.875	6.90539	3.07078e-17
Zap70	1	36761798	36782818	+		Zap70	ENSMUSG00000026117	zeta-chain (TCR) associated protein kinase [Source:MGI Symbol;Acc:MGI:99613]	108.333	507.667	427	405.667	331.667		0.213395	-2.2284	5.35743e-11
Tmem131	1	36792191	36943666	-		Tmem131	ENSMUSG00000026116	transmembrane protein 131 [Source:MGI Symbol;Acc:MGI:1927110]	3566.67	1885.67	4587	5129	5941		1.89146	0.919502	0.000402404
Vwa3b	1	37026596	37187613	+		Vwa3b	ENSMUSG00000050122	von Willebrand factor A domain containing 3B [Source:MGI Symbol;Acc:MGI:1918103]	166.667	12.3333	44	52.3333	38		13.5135	3.75633	4.24087e-12
Inpp4a	1	37299865	37410736	+		Inpp4a	ENSMUSG00000026113	inositol polyphosphate-4-phosphatase, type I [Source:MGI Symbol;Acc:MGI:1931123]	584.333	806.333	973.333	767	949.667		0.72468	-0.464585	0.0433253
Mgat4a	1	37439340	37541016	-		Mgat4a	ENSMUSG00000026110	mannoside acetylglucosaminyltransferase 4, isoenzyme A [Source:MGI Symbol;Acc:MGI:2662992]	2381.67	1269.67	2190	2177.67	2707.67		1.87582	0.907522	0.00279839
Npas2	1	39193731	39363236	+		Npas2	ENSMUSG00000026077	neuronal PAS domain protein 2 [Source:MGI Symbol;Acc:MGI:109232]	34.6667	4.66667	11.3333	39	8.66667		7.42857	2.89308	0.000578673
Tbc1d8	1	39371492	39478755	-		Rpl31	ENSMUSG00000073702	ribosomal protein L31 [Source:MGI Symbol;Acc:MGI:2149632]	2783.33	1155	6265	5518	8669		2.40981	1.26892	1.37246e-18
Creg2	1	39618406	39651474	-		Creg2	ENSMUSG00000050967	cellular repressor of E1A-stimulated genes 2 [Source:MGI Symbol;Acc:MGI:1928333]	137.333	15	23.6667	42	78.6667		9.15556	3.19465	1.15043e-05
Map4k4	1	39900913	40026310	+		Map4k4	ENSMUSG00000026074	mitogen-activated protein kinase kinase kinase kinase 4 [Source:MGI Symbol;Acc:MGI:1349394]	4908.33	2344.67	7002.33	13124.7	16682.3		2.0934	1.06585	6.63298e-05
Il1r1	1	40225080	40317257	+		Il1r1	ENSMUSG00000026072	interleukin 1 receptor, type I [Source:MGI Symbol;Acc:MGI:96545]	522.333	124.333	173.667	176.333	62		4.20107	2.07076	1.06635e-06
Il1rl1	1	40429570	40465415	+		Il1rl1	ENSMUSG00000026069	interleukin 1 receptor-like 1 [Source:MGI Symbol;Acc:MGI:98427]	28	167.667	11.3333	10.6667	29.3333		0.166998	-2.5821	0.00159398
Il18r1	1	40465552	40500854	+		Il18r1	ENSMUSG00000026070	interleukin 18 receptor 1 [Source:MGI Symbol;Acc:MGI:105383]	296	1062.67	156.667	116.667	437		0.278545	-1.84402	1.10161e-05
Il18rap	1	40515362	40551705	+		Il18rap	ENSMUSG00000026068	interleukin 18 receptor accessory protein [Source:MGI Symbol;Acc:MGI:1338888]	150.667	1629	104.333	405.333	283		0.0924903	-3.43455	2.10171e-20
Mfsd9	1	40772038	40790687	-		Gm37915	ENSMUSG00000103270	predicted gene, 37915 [Source:MGI Symbol;Acc:MGI:5611143]	97	49	54.6667	54	64.6667		1.97959	0.985203	0.0396468
Fhl2	1	43123074	43196984	-		Fhl2	ENSMUSG00000008136	four and a half LIM domains 2 [Source:MGI Symbol;Acc:MGI:1338762]	18	150	5.33333	8.66667	28		0.12	-3.05889	0.000396908
Tex30	1	44086613	44102441	-		Tex30	ENSMUSG00000026049	testis expressed 30 [Source:MGI Symbol;Acc:MGI:1922873]	234.667	354.667	303	260.667	345		0.661654	-0.595851	0.013727
Wdr75	1	45795166	45823619	+		Wdr75	ENSMUSG00000025995	WD repeat domain 75 [Source:MGI Symbol;Acc:MGI:1920924]	589	866.333	667.333	498	862.333		0.679877	-0.556655	0.000416282
Gm17767	1	51507086	51596718	-		Gm17767	ENSMUSG00000099413	predicted gene, 17767 [Source:MGI Symbol;Acc:MGI:5009931]	84	11.6667	119.333	19.3333	74.3333		7.2	2.848	6.43176e-05
Stat4	1	51987148	52107189	+		Stat4	ENSMUSG00000062939	signal transducer and activator of transcription 4 [Source:MGI Symbol;Acc:MGI:103062]	2176.67	1179.33	6834.67	5804.67	7633.33		1.84568	0.884149	0.000869804
Gm28177	1	52077261	52156087	+		Stat4	ENSMUSG00000062939	signal transducer and activator of transcription 4 [Source:MGI Symbol;Acc:MGI:103062]	2886.33	1809.33	19751	13390	11657		1.59525	0.67378	0.0173176
Gm31812	1	52108121	52113751	-		Gm28177	ENSMUSG00000101628	predicted gene 28177 [Source:MGI Symbol;Acc:MGI:5578883]	170	53	40	31.6667	63.6667		3.20755	1.68147	0.0430971
Gm37242	1	52653808	52655892	-		Gm37242	ENSMUSG00000103630	predicted gene, 37242 [Source:MGI Symbol;Acc:MGI:5610470]	0.333333	10.3333	0.333333	0.666667	0.333333		0.0322581	-4.9542	0.0172236
Inpp1	1	52785427	52817688	-		Inpp1	ENSMUSG00000026102	inositol polyphosphate-1-phosphatase [Source:MGI Symbol;Acc:MGI:104848]	322	545.667	534.667	437.667	567.333		0.590104	-0.760959	6.52641e-05
Gtf3c3	1	54396004	54438971	-		Gtf3c3	ENSMUSG00000041303	general transcription factor IIIC, polypeptide 3 [Source:MGI Symbol;Acc:MGI:2138383]	509.667	339.333	423	322.333	467		1.50196	0.586851	0.00663123
Gm37370	1	54737166	54738575	-		Ankrd44	ENSMUSG00000052331	ankyrin repeat domain 44 [Source:MGI Symbol;Acc:MGI:3045243]	1.33333	19.6667	0.333333	1.66667	3		0.0677966	-3.88264	0.00679837
Satb2	1	56793981	56978650	-		Satb2	ENSMUSG00000038331	special AT-rich sequence binding protein 2 [Source:MGI Symbol;Acc:MGI:2679336]	61.6667	24.3333	12.6667	15.6667	26.3333		2.53425	1.34156	0.0148436
Gm37607	1	58383512	58386134	-		Gm37607	ENSMUSG00000103839	predicted gene, 37607 [Source:MGI Symbol;Acc:MGI:5610835]	68.6667	25	25.3333	31.6667	50.3333		2.74667	1.45768	0.00294031
Als2cr12	1	58646903	58695989	-		Cbx3-ps7	ENSMUSG00000059647	chromobox 3, pseudogene 7 [Source:MGI Symbol;Acc:MGI:3704187]	1.66667	35	0.666667	1	1.33333		0.047619	-4.39232	0.000102039
Cflar	1	58711508	58758884	+		Cflar	ENSMUSG00000026031	CASP8 and FADD-like apoptosis regulator [Source:MGI Symbol;Acc:MGI:1336166]	2437	1732.33	3688.67	3027	4892.33		1.40677	0.49239	0.0439462
Carf	1	60098247	60153953	+		Wdr12	ENSMUSG00000026019	WD repeat domain 12 [Source:MGI Symbol;Acc:MGI:1927241]	197.333	111	93.3333	92.6667	172.667		1.77778	0.830075	0.0306127
Nbeal1	1	60180599	60338328	+		Nbeal1	ENSMUSG00000073664	neurobeachin like 1 [Source:MGI Symbol;Acc:MGI:2444343]	682	371	520.667	488.667	842.333		1.83827	0.878353	0.00926815
Cd28	1	60716800	60773359	+		Cd28	ENSMUSG00000026012	CD28 antigen [Source:MGI Symbol;Acc:MGI:88327]	269	984	543.333	357	793		0.273374	-1.87105	7.13685e-13
Icos	1	60977927	61000320	+		Icos	ENSMUSG00000026009	inducible T cell co-stimulator [Source:MGI Symbol;Acc:MGI:1858745]	320.333	516.333	153	202.667	394		0.6204	-0.688729	0.0184855
Pard3b	1	61638824	62642284	+		Pard3b	ENSMUSG00000052062	par-3 family cell polarity regulator beta [Source:MGI Symbol;Acc:MGI:1919301]	393	42.6667	243.333	231.667	78.3333		9.21094	3.20335	3.54247e-34
Nrp2	1	62703285	62818695	+		Nrp2	ENSMUSG00000025969	neuropilin 2 [Source:MGI Symbol;Acc:MGI:1100492]	2741.33	339	2007.67	3779	1442.67		8.08653	3.01552	4.32761e-09
Gm37121	1	62809302	62811857	+		Nrp2	ENSMUSG00000025969	neuropilin 2 [Source:MGI Symbol;Acc:MGI:1100492]	12.6667	0	1.33333	3	1		#DIV/0!	#DIV/0!	0.00692351
Gm20342	1	63117118	63126837	+		Ino80dos	ENSMUSG00000084799	INO80 complex subunit D, opposite strand [Source:MGI Symbol;Acc:MGI:3651861]	151	51.3333	23.6667	47.6667	129		2.94156	1.55658	0.0280304
Idh1	1	65158616	65186500	-		Idh1	ENSMUSG00000025950	isocitrate dehydrogenase 1 (NADP+), soluble [Source:MGI Symbol;Acc:MGI:96413]	996	633	1026.33	1237	2024.33		1.57346	0.65394	0.0337592
Pikfyve	1	65186683	65278695	+		Pikfyve	ENSMUSG00000025949	phosphoinositide kinase, FYVE type zinc finger containing [Source:MGI Symbol;Acc:MGI:1335106]	2012	1148	1697.67	1521.33	2563.33		1.75261	0.809508	0.000100506
Mreg	1	72159442	72212307	-		Mreg	ENSMUSG00000039395	melanoregulin [Source:MGI Symbol;Acc:MGI:2151839]	1385.67	678	2238.67	4383.33	4742.33		2.04376	1.03122	0.00373295
Cxcr2	1	74153989	74161246	+		Cxcr2	ENSMUSG00000026180	chemokine (C-X-C motif) receptor 2 [Source:MGI Symbol;Acc:MGI:105303]	38.6667	208.667	106.333	1116.67	9.66667		0.185304	-2.43204	1.11316e-11
Pnkd	1	74284930	74353694	+		Pnkd	ENSMUSG00000026179	paroxysmal nonkinesiogenic dyskinesia [Source:MGI Symbol;Acc:MGI:1930773]	436.333	126.333	758	340.667	430		3.45383	1.7882	4.39918e-10
Slc11a1	1	74375195	74386062	+		Slc11a1	ENSMUSG00000026177	solute carrier family 11 (proton-coupled divalent metal ion transporters), member 1 [Source:MGI Symbol;Acc:MGI:1345275]	1665.33	1094.67	2641.67	4121.33	5432.67		1.52132	0.605319	0.00127985
Cyp27a1	1	74713574	74737892	+		Cyp27a1	ENSMUSG00000026170	cytochrome P450, family 27, subfamily a, polypeptide 1 [Source:MGI Symbol;Acc:MGI:88594]	370.333	648.667	445.667	251.667	854.667		0.570915	-0.808653	0.00403371
Tuba4a	1	75214228	75219865	-		Stk16	ENSMUSG00000026201	serine/threonine kinase 16 [Source:MGI Symbol;Acc:MGI:1313271]	639.667	954.333	3385	3395	2050		0.670276	-0.577173	0.000578673
Dnajb2	1	75236406	75245692	+		Dnajb2	ENSMUSG00000026203	DnaJ heat shock protein family (Hsp40) member B2 [Source:MGI Symbol;Acc:MGI:1928739]	854.667	424.667	651.667	866	1179.33		2.01256	1.00903	3.90168e-05
Ptprn	1	75247027	75264502	-		Ptprn	ENSMUSG00000026204	protein tyrosine phosphatase, receptor type, N [Source:MGI Symbol;Acc:MGI:102765]	38	7	7.33333	10.6667	8		5.42857	2.44057	0.028112
Chpf	1	75474569	75479307	-		Chpf	ENSMUSG00000032997	chondroitin polymerizing factor [Source:MGI Symbol;Acc:MGI:106576]	146	328.333	455.667	288.667	411.667		0.44467	-1.16919	0.00235573
Mogat1	1	78510991	78538173	+		BC035947	ENSMUSG00000090486	cDNA sequence BC035947 [Source:MGI Symbol;Acc:MGI:2652858]	1	16.3333	0.333333	0	0		0.0612245	-4.02975	0.0160644
Gm29125	1	80382822	80386251	+		Gm29125	ENSMUSG00000101722	predicted gene 29125 [Source:MGI Symbol;Acc:MGI:5579831]	2	29.6667	1.33333	4.66667	3.66667		0.0674157	-3.89077	0.000184132
Irs1	1	82233101	82291416	-		Irs1	ENSMUSG00000055980	insulin receptor substrate 1 [Source:MGI Symbol;Acc:MGI:99454]	26.6667	4.33333	0.333333	0.666667	15		6.15385	2.62149	0.0266244
Gm28884	1	85933247	85937332	-		4933407L21Rik	ENSMUSG00000026224	RIKEN cDNA 4933407L21 gene [Source:MGI Symbol;Acc:MGI:1918391]	72.6667	9.33333	22	13	20.6667		7.78571	2.96083	3.13357e-05
Gpr55	1	85938318	85961007	-		4933407L21Rik	ENSMUSG00000026224	RIKEN cDNA 4933407L21 gene [Source:MGI Symbol;Acc:MGI:1918391]	892.333	354.333	1074.67	896.667	651.667		2.51834	1.33248	0.000435415
Gm28100	1	85972365	85986917	-		Gm28100	ENSMUSG00000100108	predicted gene 28100 [Source:MGI Symbol;Acc:MGI:5578806]	54.3333	5	27.6667	19	26		10.8667	3.44184	1.99416e-07
Armc9	1	86154780	86278284	+		Gm21972	ENSMUSG00000094638	predicted gene 21972 [Source:MGI Symbol;Acc:MGI:5439441]	275	150.667	121.333	163.667	267.333		1.82522	0.868071	0.00744312
Efhd1	1	87264363	87310839	+		Efhd1	ENSMUSG00000026255	EF hand domain containing 1 [Source:MGI Symbol;Acc:MGI:1921607]	2	13	1.33333	2.33333	1		0.153846	-2.70044	0.0467677
Usp40	1	87945119	88008551	-		Dgkd	ENSMUSG00000070738	diacylglycerol kinase, delta [Source:MGI Symbol;Acc:MGI:2138334]	671.667	331.667	417.667	373	564.333		2.02513	1.01801	3.25623e-06
Ugt1a10	1	88055388	88219004	+		Ugt1a10	ENSMUSG00000090165	UDP glycosyltransferase 1 family, polypeptide A10 [Source:MGI Symbol;Acc:MGI:3580642]	595.333	282.667	534.333	789.333	439		2.10613	1.0746	3.22527e-07
Gm20528	1	88055393	88218584	-		Ugt1a10	ENSMUSG00000090165	UDP glycosyltransferase 1 family, polypeptide A10 [Source:MGI Symbol;Acc:MGI:3580642]	182.333	83.6667	173	256	143		2.17928	1.12385	7.48693e-05
Ugt1a9	1	88070800	88218997	+		Ugt1a10	ENSMUSG00000090165	UDP glycosyltransferase 1 family, polypeptide A10 [Source:MGI Symbol;Acc:MGI:3580642]	595.667	283	534.667	789.333	439		2.10483	1.0737	3.36756e-07
Ugt1a8	1	88087813	88219004	+		Ugt1a10	ENSMUSG00000090165	UDP glycosyltransferase 1 family, polypeptide A10 [Source:MGI Symbol;Acc:MGI:3580642]	594.333	282	534.333	789.333	439		2.10756	1.07558	3.49976e-07
Ugt1a7c	1	88095062	88220002	+		Ugt1a10	ENSMUSG00000090165	UDP glycosyltransferase 1 family, polypeptide A10 [Source:MGI Symbol;Acc:MGI:3580642]	959	452.667	862	1205.33	681		2.11856	1.08308	6.48823e-08
Ugt1a6b	1	88103252	88219003	+		Ugt1a10	ENSMUSG00000090165	UDP glycosyltransferase 1 family, polypeptide A10 [Source:MGI Symbol;Acc:MGI:3580642]	596.667	283.667	536	793.333	439.333		2.10341	1.07273	3.78374e-07
Ugt1a6a	1	88134809	88218997	+		Ugt1a10	ENSMUSG00000090165	UDP glycosyltransferase 1 family, polypeptide A10 [Source:MGI Symbol;Acc:MGI:3580642]	641	295.667	545	808	455		2.16798	1.11635	3.90188e-08
Ugt1a5	1	88166012	88218997	+		Ugt1a10	ENSMUSG00000090165	UDP glycosyltransferase 1 family, polypeptide A10 [Source:MGI Symbol;Acc:MGI:3580642]	594.333	281.667	534.333	789.333	439		2.11006	1.07728	3.49976e-07
Ugt1a2	1	88200601	88218997	+		Ugt1a10	ENSMUSG00000090165	UDP glycosyltransferase 1 family, polypeptide A10 [Source:MGI Symbol;Acc:MGI:3580642]	594.333	281.667	534.333	789.333	439		2.11006	1.07728	3.49976e-07
Ugt1a1	1	88211959	88218997	+		Ugt1a10	ENSMUSG00000090165	UDP glycosyltransferase 1 family, polypeptide A10 [Source:MGI Symbol;Acc:MGI:3580642]	596	283	535	789.333	440		2.10601	1.07451	2.95136e-07
Sh3bp4	1	89070415	89155068	+		Sh3bp4	ENSMUSG00000036206	SH3-domain binding protein 4 [Source:MGI Symbol;Acc:MGI:2138297]	1104.33	300.333	1643.67	1513.33	1735.33		3.67703	1.87854	2.93622e-10
Agap1	1	89454806	89897617	+		Agap1	ENSMUSG00000055013	ArfGAP with GTPase domain, ankyrin repeat and PH domain 1 [Source:MGI Symbol;Acc:MGI:2653690]	996.667	414.667	330.333	654.667	1344		2.40354	1.26516	0.0015279
Ramp1	1	91179822	91225196	+		Ramp1	ENSMUSG00000034353	receptor (calcitonin) activity modifying protein 1 [Source:MGI Symbol;Acc:MGI:1858418]	119.333	345.667	513.333	281	292		0.345227	-1.53438	5.96348e-05
Klhl30	1	91351016	91362416	+		Klhl30	ENSMUSG00000026308	kelch-like 30 [Source:MGI Symbol;Acc:MGI:1918038]	0.666667	68.6667	4.33333	6.33333	4		0.00970874	-6.6865	1.4033e-07
Per2	1	91415982	91459324	-		Per2	ENSMUSG00000055866	period circadian clock 2 [Source:MGI Symbol;Acc:MGI:1195265]	110	322.667	173.667	156	220.667		0.340909	-1.55254	0.0102155
Crocc2	1	93168725	93231072	+		Crocc2	ENSMUSG00000084989	ciliary rootlet coiled-coil, rootletin family member 2 [Source:MGI Symbol;Acc:MGI:3045962]	5.66667	31.3333	1.66667	0.333333	0.666667		0.180851	-2.46713	0.00121991
Sned1	1	93235841	93301065	+		Sned1	ENSMUSG00000047793	sushi, nidogen and EGF-like domains 1 [Source:MGI Symbol;Acc:MGI:3045960]	1184.67	255	285	387.667	1222.33		4.64575	2.21591	9.65432e-09
Mterf4	1	93299211	93305915	-		Sned1	ENSMUSG00000047793	sushi, nidogen and EGF-like domains 1 [Source:MGI Symbol;Acc:MGI:3045960]	609.333	317.333	452.667	515	673		1.92017	0.941232	0.000275353
Gal3st2	1	93861306	93876494	+		Gal3st2	ENSMUSG00000094651	galactose-3-O-sulfotransferase 2 [Source:MGI Symbol;Acc:MGI:2685834]	65.3333	5	3.66667	42.3333	53.6667		13.0667	3.70782	5.95361e-08
Gal3st2b	1	93918311	93942650	+		Gal3st2b	ENSMUSG00000093805	galactose-3-O-sulfotransferase 2B [Source:MGI Symbol;Acc:MGI:3711964]	26.3333	1.33333	0.333333	11.3333	13.3333		19.75	4.30378	0.00136148
Gal3st2c	1	93990509	94017147	+		Gal3st2c	ENSMUSG00000073608	galactose-3-O-sulfotransferase 2C [Source:MGI Symbol;Acc:MGI:3646771]	372	0.333333	10.6667	35	88.3333		1116	10.1241	5.43235e-13
Pdcd1	1	94038305	94052553	-		Pdcd1	ENSMUSG00000026285	programmed cell death 1 [Source:MGI Symbol;Acc:MGI:104879]	1158	119.333	769.667	1177.67	425.333		9.70391	3.27857	4.95894e-33
St8sia4	1	95587682	95667571	-		St8sia4	ENSMUSG00000040710	ST8 alpha-N-acetyl-neuraminide alpha-2,8- sialyltransferase 4 [Source:MGI Symbol;Acc:MGI:106018]	2636	1646.67	4158.67	3357.33	6185.67		1.60081	0.678802	0.000229013
D1Ertd622e	1	97606318	97662074	-		D1Ertd622e	ENSMUSG00000044768	DNA segment, Chr 1, ERATO Doi 622, expressed [Source:MGI Symbol;Acc:MGI:1277184]	608	911.667	1466	1318.33	1275.67		0.66691	-0.584435	0.00719998
1810006J02Rik	1	98131456	98144655	+		1810006J02Rik	ENSMUSG00000100182	RIKEN cDNA 1810006J02 gene [Source:MGI Symbol;Acc:MGI:1916280]	4.33333	74	15.3333	11.3333	5.33333		0.0585586	-4.09398	9.78668e-05
Gm7967	1	98589517	98607384	+		Gm7967	ENSMUSG00000100009	predicted gene 7967 [Source:MGI Symbol;Acc:MGI:3644984]	89.6667	11.3333	13.6667	22	42		7.91176	2.984	1.1374e-07
Rnf152	1	105276914	105356710	-		Rnf152	ENSMUSG00000047496	ring finger protein 152 [Source:MGI Symbol;Acc:MGI:2443787]	443.667	6.33333	33	119.667	138		70.0526	6.13037	1.11796e-06
Pign	1	105518422	105663677	-		Gm28403	ENSMUSG00000101214	predicted gene 28403 [Source:MGI Symbol;Acc:MGI:5579109]	1259.33	613.333	831.333	762.667	1027.33		2.05326	1.03792	1.25652e-05
Tnfrsf11a	1	105780718	105847981	+		Tnfrsf11a	ENSMUSG00000026321	tumor necrosis factor receptor superfamily, member 11a, NFKB activator [Source:MGI Symbol;Acc:MGI:1314891]	1530.67	316.667	814.667	945.333	1577.67		4.83368	2.27312	2.28754e-23
Kdsr	1	106720459	106759727	-		Kdsr	ENSMUSG00000009905	3-ketodihydrosphingosine reductase [Source:MGI Symbol;Acc:MGI:1918000]	285.667	433.333	285.667	233	424.667		0.659231	-0.601145	0.0169553
Clasp1	1	118389058	118612678	+		Clasp1	ENSMUSG00000064302	CLIP associating protein 1 [Source:MGI Symbol;Acc:MGI:1923957]	1435.33	872	1756.67	1475.33	2150.67		1.64602	0.718986	0.000186561
2900060B14Rik	1	118458652	118459267	-		Clasp1	ENSMUSG00000064302	CLIP associating protein 1 [Source:MGI Symbol;Acc:MGI:1923957]	0.666667	19.3333	0	0.666667	0		0.0344828	-4.85798	0.00141599
Tmem177	1	119907890	119913208	-		Tmem177	ENSMUSG00000036975	transmembrane protein 177 [Source:MGI Symbol;Acc:MGI:1913593]	165.667	93	188.667	181.667	185.667		1.78136	0.832981	0.0123359
Marco	1	120474538	120505024	-		Marco	ENSMUSG00000026390	macrophage receptor with collagenous structure [Source:MGI Symbol;Acc:MGI:1309998]	994	236.333	606.333	1893	2599.33		4.20592	2.07242	4.3542e-06
Ccdc93	1	121431049	121506460	+		Ccdc93	ENSMUSG00000026339	coiled-coil domain containing 93 [Source:MGI Symbol;Acc:MGI:1918079]	1239.67	814.333	635.667	756.333	1103.33		1.52231	0.606261	0.00175367
Tmem163	1	127486546	127679548	-		Mgat5	ENSMUSG00000036155	mannoside acetylglucosaminyltransferase 5 [Source:MGI Symbol;Acc:MGI:894701]	335	217.333	744.333	787	529.667		1.54141	0.624252	0.0252604
Acmsd	1	127729413	127767978	+		Acmsd	ENSMUSG00000026348	amino carboxymuconate semialdehyde decarboxylase [Source:MGI Symbol;Acc:MGI:2386323]	1.33333	23.3333	2.33333	2.33333	0		0.0571429	-4.12928	0.0353502
Gm15674	1	130422824	130437914	+		Cd55b	ENSMUSG00000026401	CD55 molecule, decay accelerating factor for complement B [Source:MGI Symbol;Acc:MGI:104849]	187	106.667	132.667	136.667	648.333		1.75313	0.809929	0.0422221
Dyrk3	1	131127455	131138340	-		Dyrk3	ENSMUSG00000016526	dual-specificity tyrosine-(Y)- phosphorylation regulated kinase 3 [Source:MGI Symbol;Acc:MGI:1330300]	85.6667	214.333	162	160.667	51.6667		0.399689	-1.32305	0.00133545
Rassf5	1	131176410	131245258	-		Eif2d	ENSMUSG00000026427	eukaryotic translation initiation factor 2D [Source:MGI Symbol;Acc:MGI:109342]	1338	2051.67	4694.33	4428	3688.67		0.652153	-0.616718	0.0122969
Gm28913	1	131263330	131266749	+		Ikbke	ENSMUSG00000042349	inhibitor of kappaB kinase epsilon [Source:MGI Symbol;Acc:MGI:1929612]	32.3333	11.3333	11.6667	27.6667	24.3333		2.85294	1.51245	0.0420161
Srgap2	1	131285251	131527352	-		Srgap2	ENSMUSG00000026425	SLIT-ROBO Rho GTPase activating protein 2 [Source:MGI Symbol;Acc:MGI:109605]	1169.33	655.667	1156	936	1176.67		1.78343	0.834652	0.000285564
Ctse	1	131638306	131675505	+		Ctse	ENSMUSG00000004552	cathepsin E [Source:MGI Symbol;Acc:MGI:107361]	220.667	615.333	506.667	332.333	315		0.358613	-1.4795	0.00408667
Rab29	1	131867224	131872887	+		Rab29	ENSMUSG00000026433	RAB29, member RAS oncogene family [Source:MGI Symbol;Acc:MGI:2385107]	497.667	321.333	913	795	968.667		1.54876	0.631109	0.021171
Cdk18	1	132112237	132139684	-		Cdk18	ENSMUSG00000026437	cyclin-dependent kinase 18 [Source:MGI Symbol;Acc:MGI:97518]	236.333	54	37.6667	207.667	500.333		4.37654	2.12979	5.20727e-05
Lemd1	1	132191431	132259227	+		Lemd1	ENSMUSG00000079330	LEM domain containing 1 [Source:MGI Symbol;Acc:MGI:1922403]	7	0	0	0	0		#DIV/0!	#DIV/0!	0.0211655
F730311O21Rik	1	132342023	132349626	+		F730311O21Rik	ENSMUSG00000100658	RIKEN cDNA F730311O21 gene [Source:MGI Symbol;Acc:MGI:3643355]	467.333	212	301.333	353	1335		2.2044	1.14039	0.0332408
Nfasc	1	132564690	132741797	-		Nfasc	ENSMUSG00000026442	neurofascin [Source:MGI Symbol;Acc:MGI:104753]	260.333	58.3333	1.66667	9.33333	76		4.46286	2.15797	1.56252e-06
Ren1	1	133350510	133360325	+		Ren1	ENSMUSG00000070645	renin 1 structural [Source:MGI Symbol;Acc:MGI:97898]	51.6667	0	4.33333	4.66667	2		#DIV/0!	#DIV/0!	1.65349e-08
Etnk2	1	133363572	133380336	+		Etnk2	ENSMUSG00000070644	ethanolamine kinase 2 [Source:MGI Symbol;Acc:MGI:2443760]	477	11.6667	30	226.667	17.3333		40.8857	5.35352	0
Zbed6	1	133655879	133660885	-		Zc3h11a	ENSMUSG00000102976	zinc finger CCCH type containing 11A [Source:MGI Symbol;Acc:MGI:1917829]	975	629	458	359.667	1038.67		1.55008	0.632342	0.000702443
Chil1	1	134182176	134190181	+		Chil1	ENSMUSG00000064246	chitinase-like 1 [Source:MGI Symbol;Acc:MGI:1340899]	9.33333	41	128	4294	1.66667		0.227642	-2.13516	0.00470778
Ppfia4	1	134296783	134332928	-		Ppfia4	ENSMUSG00000026458	protein tyrosine phosphatase, receptor type, f polypeptide (PTPRF), interacting protein (liprin), alpha 4 [Source:MGI Symbol;Acc:MGI:1915757]	273.333	794.333	373	481.333	796		0.344104	-1.53908	6.62307e-05
Ptpn7	1	135132700	135145317	+		Ptpn7	ENSMUSG00000031506	protein tyrosine phosphatase, non-receptor type 7 [Source:MGI Symbol;Acc:MGI:2156893]	519.333	1369	1519.33	1349.67	1166.67		0.379352	-1.39839	3.48006e-06
Gm4793	1	135584773	135599948	+		Nav1	ENSMUSG00000009418	neuron navigator 1 [Source:MGI Symbol;Acc:MGI:2183683]	34	5.66667	8	20.3333	56.3333		6	2.58496	0.0382716
Gm38399	1	135606447	135688105	-		Nav1	ENSMUSG00000009418	neuron navigator 1 [Source:MGI Symbol;Acc:MGI:2183683]	71	15	17	33	86.6667		4.73333	2.24286	0.000462491
Lad1	1	135818598	135833342	+		Lad1	ENSMUSG00000041782	ladinin [Source:MGI Symbol;Acc:MGI:109343]	721	178.667	524.667	1279.67	1719.67		4.03545	2.01273	4.63198e-16
Gm19705	1	136670769	136690804	+		Gm19705	ENSMUSG00000097113	predicted gene, 19705 [Source:MGI Symbol;Acc:MGI:5011890]	14	51	12.6667	23.3333	26.3333		0.27451	-1.86507	0.00855139
A130071D04Rik	1	138161820	138167683	-		Ptprc	ENSMUSG00000026395	protein tyrosine phosphatase, receptor type, C [Source:MGI Symbol;Acc:MGI:97810]	9	35.3333	5.33333	14	13.6667		0.254717	-1.97303	0.0406978
Cfh	1	140084708	140183764	-		Cfh	ENSMUSG00000026365	complement component factor h [Source:MGI Symbol;Acc:MGI:88385]	59	222.333	7.33333	11	16.6667		0.265367	-1.91394	3.40068e-14
Gm29170	1	143777642	143781307	+		Uchl5	ENSMUSG00000018189	ubiquitin carboxyl-terminal esterase L5 [Source:MGI Symbol;Acc:MGI:1914848]	22	55	24	15.3333	29.3333		0.4	-1.32193	0.011335
Rgs2	1	143999338	144004161	-		Rgs2	ENSMUSG00000026360	regulator of G-protein signaling 2 [Source:MGI Symbol;Acc:MGI:1098271]	1225.67	2483.33	1246	1623	2210		0.493557	-1.01871	0.0015279
Rgs1	1	144242296	144249242	-		Rgs1	ENSMUSG00000026358	regulator of G-protein signaling 1 [Source:MGI Symbol;Acc:MGI:1354694]	1564.33	2658	3238.33	4052.33	6193.67		0.588538	-0.764793	0.00768499
Ptgs2os2	1	150159043	150164948	-		Ptgs2os2	ENSMUSG00000097754	prostaglandin-endoperoxide synthase 2, opposite strand 2 [Source:MGI Symbol;Acc:MGI:5477181]	4.33333	40.3333	2.33333	15	0		0.107438	-3.21842	0.000102001
Fam129a	1	151571186	151721939	+		Fam129a	ENSMUSG00000026483	family with sequence similarity 129, member A [Source:MGI Symbol;Acc:MGI:2137237]	2879	1943	4390.33	3462.67	4138		1.48173	0.567282	0.0173719
1700025G04Rik	1	151852403	152090125	-		1700025G04Rik	ENSMUSG00000032666	RIKEN cDNA 1700025G04 gene [Source:MGI Symbol;Acc:MGI:1916649]	392	820.333	143.667	199	228.333		0.477855	-1.06536	0.00381895
E330020D12Rik	1	153404827	153414233	-		E330020D12Rik	ENSMUSG00000073538	Riken cDNA E330020D12 gene [Source:MGI Symbol;Acc:MGI:3761270]	94.6667	209	63	70	236.333		0.452951	-1.14257	0.0400497
Gm9530	1	155063447	155083266	-		Gm9530	ENSMUSG00000096950	predicted gene 9530 [Source:MGI Symbol;Acc:MGI:3779939]	21.3333	63.6667	19.3333	23.3333	38.6667		0.335079	-1.57743	0.0387098
Cep350	1	155844964	155973255	-		Gm37571	ENSMUSG00000102558	predicted gene, 37571 [Source:MGI Symbol;Acc:MGI:5610799]	2723.67	1768.33	2869.33	2069.67	4061.67		1.54025	0.62316	0.00279701
Soat1	1	156424525	156474331	-		Soat1	ENSMUSG00000026600	sterol O-acyltransferase 1 [Source:MGI Symbol;Acc:MGI:104665]	1617	1107	2538	2727.33	3373		1.4607	0.546664	0.00182867
Rasal2	1	157135182	157412595	-		Rasal2	ENSMUSG00000070565	RAS protein activator like 2 [Source:MGI Symbol;Acc:MGI:2443881]	732.667	238.333	293	140	700.333		3.07413	1.62018	0.000674799
Pappa2	1	158711727	158980490	-		Pappa2	ENSMUSG00000073530	pappalysin 2 [Source:MGI Symbol;Acc:MGI:3051647]	28.6667	3	14.6667	32	74.3333		9.55556	3.25634	0.00242756
Tnr	1	159523769	159931729	+		Tnr	ENSMUSG00000015829	tenascin R [Source:MGI Symbol;Acc:MGI:99516]	20	1	15.6667	11.6667	13		20	4.32193	0.00199602
Zbtb37	1	161002922	161034849	-		Serpinc1	ENSMUSG00000026715	serine (or cysteine) peptidase inhibitor, clade C (antithrombin), member 1 [Source:MGI Symbol;Acc:MGI:88095]	985.333	561.333	683	549	1472.67		1.75534	0.811754	0.00522025
Tnfsf4	1	161395409	161418410	+		Tnfsf4	ENSMUSG00000026700	tumor necrosis factor (ligand) superfamily, member 4 [Source:MGI Symbol;Acc:MGI:104511]	641.333	65.6667	663	516.667	755.667		9.7665	3.28784	0.00992605
Tnfsf18	1	161494655	161505290	+		Tnfsf18	ENSMUSG00000066755	tumor necrosis factor (ligand) superfamily, member 18 [Source:MGI Symbol;Acc:MGI:2673064]	37.3333	113.333	42.6667	40.3333	23.6667		0.329412	-1.60204	0.02929
Fasl	1	161780689	161788495	-		Fasl	ENSMUSG00000000817	Fas ligand (TNF superfamily, member 6) [Source:MGI Symbol;Acc:MGI:99255]	98.6667	538.667	106.667	50.3333	49.3333		0.183168	-2.44876	7.1543e-19
Dnm3	1	161982453	162478034	-		Gm38304	ENSMUSG00000103393	predicted gene, 38304 [Source:MGI Symbol;Acc:MGI:5611532]	6	53.3333	43.3333	25.3333	32.3333		0.1125	-3.152	0.00840315
Kifap3	1	163779583	163917109	+		Kifap3	ENSMUSG00000026585	kinesin-associated protein 3 [Source:MGI Symbol;Acc:MGI:107566]	321	137.667	234.667	184.667	218		2.33172	1.22139	3.94483e-05
F5	1	164151838	164220277	+		Gm16548	ENSMUSG00000086593	predicted gene 16548 [Source:MGI Symbol;Acc:MGI:4414968]	411	44.3333	24	212.333	21.3333		9.27068	3.21267	2.09744e-20
Gm20743	1	164863133	164936775	+		Gm32569	ENSMUSG00000103659	predicted gene, 32569 [Source:MGI Symbol;Acc:MGI:5591728]	5.66667	119.667	6.33333	8.66667	22		0.0473538	-4.40038	1.17818e-10
Xcl1	1	164931644	164935527	-		Gm20743	ENSMUSG00000104117	predicted gene, 20743 [Source:MGI Symbol;Acc:MGI:5434099]	15	308.667	134	188.667	307.667		0.0485961	-4.36302	5.41168e-32
Gpr161	1	165295789	165326745	+		Gpr161	ENSMUSG00000040836	G protein-coupled receptor 161 [Source:MGI Symbol;Acc:MGI:2685054]	4.33333	21.3333	1.66667	2.33333	3.66667		0.203125	-2.29956	0.0280082
Cd247	1	165788681	165877277	+		Gm16565	ENSMUSG00000089829	predicted gene 16565 [Source:MGI Symbol;Acc:MGI:4414985]	646	1012.67	1012	852.333	1137.33		0.63792	-0.648553	0.00548462
Pou2f1	1	165865154	166002678	-		Cd247	ENSMUSG00000005763	CD247 antigen [Source:MGI Symbol;Acc:MGI:88334]	1313	787.667	1347.67	1166.67	1988		1.66695	0.73721	0.00146628
Ildr2	1	166254139	166316823	+		Ildr2	ENSMUSG00000040612	immunoglobulin-like domain containing receptor 2 [Source:MGI Symbol;Acc:MGI:1196370]	10.3333	0	0.333333	0	0		#DIV/0!	#DIV/0!	0.00538695
Mgst3	1	167371966	167393841	-		Mgst3	ENSMUSG00000026688	microsomal glutathione S-transferase 3 [Source:MGI Symbol;Acc:MGI:1913697]	34.6667	98.6667	69	69	54.6667		0.351351	-1.50901	0.0354409
Uap1	1	170141938	170174957	-		Uap1	ENSMUSG00000026670	UDP-N-acetylglucosamine pyrophosphorylase 1 [Source:MGI Symbol;Acc:MGI:1334459]	1637.33	766.667	3264	3981	4430.33		2.13565	1.09468	1.4033e-07
Sh2d1b2	1	170232749	170253608	+		Sh2d1b2	ENSMUSG00000073494	SH2 domain containing 1B2 [Source:MGI Symbol;Acc:MGI:3622649]	0.333333	10.3333	4	0.666667	1.33333		0.0322581	-4.9542	0.0226765
Gm10522	1	170981944	170986466	+		Gm10522	ENSMUSG00000104340	predicted gene 10522 [Source:MGI Symbol;Acc:MGI:3642357]	10.6667	52.3333	14.6667	22	19.6667		0.203822	-2.29462	4.89119e-05
F11r	1	171437535	171464603	+		F11r	ENSMUSG00000038235	F11 receptor [Source:MGI Symbol;Acc:MGI:1321398]	466.333	250.667	717.333	592.667	297		1.86037	0.895591	1.02783e-05
Itln1	1	171518122	171535294	-		Itln1	ENSMUSG00000038209	intelectin 1 (galactofuranose binding) [Source:MGI Symbol;Acc:MGI:1333831]	29.3333	0	4.66667	10.6667	5		#DIV/0!	#DIV/0!	1.49629e-06
Cd244	1	171559193	171609746	+		Cd244	ENSMUSG00000004709	CD244 natural killer cell receptor 2B4 [Source:MGI Symbol;Acc:MGI:109294]	285.333	1284	74.3333	137.667	240.333		0.222222	-2.16992	2.9242e-23
Slamf7	1	171632403	171653035	-		Slamf7	ENSMUSG00000038179	SLAM family member 7 [Source:MGI Symbol;Acc:MGI:1922595]	878	1731	5140.33	1590.33	3156		0.507221	-0.979313	0.000746073
Gm37787	1	171634879	171636022	+		Slamf7	ENSMUSG00000038179	SLAM family member 7 [Source:MGI Symbol;Acc:MGI:1922595]	58	130.667	263	97.3333	173.667		0.443878	-1.17177	0.00269809
Slamf1	1	171767127	171801184	+		Slamf1	ENSMUSG00000015316	signaling lymphocytic activation molecule family member 1 [Source:MGI Symbol;Acc:MGI:1351314]	86.6667	244.333	189	216.333	192.667		0.354707	-1.4953	0.0036471
Igsf8	1	172261641	172319841	+		Igsf8	ENSMUSG00000038034	immunoglobulin superfamily, member 8 [Source:MGI Symbol;Acc:MGI:2154090]	789.667	522	1459.33	1451.33	2697		1.51277	0.597194	0.00911741
Atp1a2	1	172271709	172298064	-		Igsf8	ENSMUSG00000038034	immunoglobulin superfamily, member 8 [Source:MGI Symbol;Acc:MGI:2154090]	14.3333	1.66667	3.33333	7.33333	0		8.6	3.10434	0.043009
Kcnj10	1	172341210	172374085	+		Kcnj10	ENSMUSG00000044708	potassium inwardly-rectifying channel, subfamily J, member 10 [Source:MGI Symbol;Acc:MGI:1194504]	1777.33	928	65	62	1039.67		1.91523	0.937518	0.0141712
Gm37145	1	172388234	172390989	-		Gm37145	ENSMUSG00000102278	predicted gene, 37145 [Source:MGI Symbol;Acc:MGI:5610373]	194	31.3333	229	320.667	56.3333		6.19149	2.63029	3.5582e-09
Slamf8	1	172581758	172590568	-		Slamf8	ENSMUSG00000053318	SLAM family member 8 [Source:MGI Symbol;Acc:MGI:1921998]	89.6667	486.667	539.333	699	436.333		0.184247	-2.44029	4.38535e-19
Fcrl6	1	172596642	172602551	-		Fcrl6	ENSMUSG00000070504	Fc receptor-like 6 [Source:MGI Symbol;Acc:MGI:3618339]	0.333333	21	4.33333	2	1.33333		0.015873	-5.97728	0.000720168
Fcer1a	1	173221284	173227214	-		Fcer1a	ENSMUSG00000005339	Fc receptor, IgE, high affinity I, alpha polypeptide [Source:MGI Symbol;Acc:MGI:95494]	1.66667	26.3333	0.666667	18	0.333333		0.0632911	-3.98185	0.00142001
Ackr1	1	173331886	173333750	-		Ackr1	ENSMUSG00000037872	atypical chemokine receptor 1 (Duffy blood group) [Source:MGI Symbol;Acc:MGI:1097689]	18.3333	69.3333	6.66667	30	46.3333		0.264423	-1.91908	0.00262945
Cadm3	1	173333258	173367695	-		Ackr1	ENSMUSG00000037872	atypical chemokine receptor 1 (Duffy blood group) [Source:MGI Symbol;Acc:MGI:1097689]	158.667	352	59.6667	255.333	397		0.450758	-1.14958	9.7396e-05
Ifi205	1	174011998	174031810	-		Ifi205	ENSMUSG00000054203	interferon activated gene 205 [Source:MGI Symbol;Acc:MGI:101847]	60	284.667	237.667	454.333	86		0.210773	-2.24624	0.00157478
Akt3	1	177020073	177258203	-		Sdccag8	ENSMUSG00000026504	serologically defined colon cancer antigen 8 [Source:MGI Symbol;Acc:MGI:1924066]	1505.33	909.333	1145	1168.33	2350		1.65543	0.727202	0.000240409
Gm26801	1	177428338	177443270	-		Gm26801	ENSMUSG00000097892	predicted gene, 26801 [Source:MGI Symbol;Acc:MGI:5477295]	65.3333	13.3333	16	12.3333	31.3333		4.9	2.29278	0.0156185
Zbtb18	1	177442351	177450764	+		Gm26801	ENSMUSG00000097892	predicted gene, 26801 [Source:MGI Symbol;Acc:MGI:5477295]	2903.33	1224	3703.33	3878.33	5545.67		2.372	1.24611	6.49858e-08
Gm37858	1	177635707	177636937	-		Gm37858	ENSMUSG00000103767	predicted gene, 37858 [Source:MGI Symbol;Acc:MGI:5611086]	43.6667	2.33333	0	7.33333	20		18.7143	4.22607	0.00143936
2310043L19Rik	1	177641542	177642943	-		2310043L19Rik	ENSMUSG00000101746	RIKEN cDNA 2310043L19 gene [Source:MGI Symbol;Acc:MGI:1922839]	74.6667	3.66667	4.66667	17.3333	34		20.3636	4.34792	0.000144273
Psen2	1	180227004	180263438	-		Psen2	ENSMUSG00000010609	presenilin 2 [Source:MGI Symbol;Acc:MGI:109284]	1081.33	584.333	1925.67	2574	2342		1.85054	0.887948	0.000647218
Stum	1	180432387	180483504	-		Stum	ENSMUSG00000053963	mechanosensory transduction mediator [Source:MGI Symbol;Acc:MGI:2138735]	457.333	17.3333	59	108	284		26.3846	4.72163	3.20402e-26
Gm37267	1	180508778	180519727	-		Gm37267	ENSMUSG00000102608	predicted gene, 37267 [Source:MGI Symbol;Acc:MGI:5610495]	89	13	104.667	114	72.3333		6.84615	2.77529	2.17772e-10
Ephx1	1	180976210	181020904	-		Gm36961	ENSMUSG00000103930	predicted gene, 36961 [Source:MGI Symbol;Acc:MGI:5610189]	451	713	3157.67	3704.67	2573.67		0.632539	-0.660775	0.0226515
Dnah14	1	181576559	181815774	+		Dnah14	ENSMUSG00000047369	dynein, axonemal, heavy chain 14 [Source:MGI Symbol;Acc:MGI:2444525]	209	336	634	635.333	833		0.622024	-0.684958	0.00972409
Lbr	1	181815335	181843046	-		Dnah14	ENSMUSG00000047369	dynein, axonemal, heavy chain 14 [Source:MGI Symbol;Acc:MGI:2444525]	1169.67	1745	3238	2462.33	4041.33		0.670296	-0.57713	0.0111773
Gm33973	1	183563512	183564045	+		Gm33973	ENSMUSG00000103451	predicted gene, 33973 [Source:MGI Symbol;Acc:MGI:5593132]	3.33333	19.3333	1.66667	0.666667	1.66667		0.172414	-2.53605	0.0147235
Rrp15	1	186720978	186749358	-		Rrp15	ENSMUSG00000001305	ribosomal RNA processing 15 homolog (S. cerevisiae) [Source:MGI Symbol;Acc:MGI:1914473]	231.333	336	438	340	398		0.688492	-0.538488	0.0453907
Ptpn14	1	189728268	189876695	+		Ptpn14	ENSMUSG00000026604	protein tyrosine phosphatase, non-receptor type 14 [Source:MGI Symbol;Acc:MGI:102467]	1267	190.333	3263	3142.33	480.333		6.65674	2.73482	9.95462e-11
Gm26574	1	189833141	189836620	-		Ptpn14	ENSMUSG00000026604	protein tyrosine phosphatase, non-receptor type 14 [Source:MGI Symbol;Acc:MGI:102467]	22.6667	4.33333	52.3333	50	10		5.23077	2.38702	0.0364978
Gm37422	1	189879935	189884652	+		Gm37422	ENSMUSG00000104435	predicted gene, 37422 [Source:MGI Symbol;Acc:MGI:5610650]	736	112.667	813.667	578.333	953.333		6.53254	2.70765	2.2141e-12
Smyd2	1	189880492	189922363	-		Gm37422	ENSMUSG00000104435	predicted gene, 37422 [Source:MGI Symbol;Acc:MGI:5610650]	381	182	511.667	429.667	420.667		2.09341	1.06585	0.00149905
Fam71a	1	191162584	191164817	-		Fam71a	ENSMUSG00000091017	family with sequence similarity 71, member A [Source:MGI Symbol;Acc:MGI:3588202]	0	11	0	0	0.666667		0	#NUM!	0.0215438
Atf3	1	191170296	191218039	-		Atf3	ENSMUSG00000026628	activating transcription factor 3 [Source:MGI Symbol;Acc:MGI:109384]	514.667	1633.33	1023.67	1106.33	1948		0.315102	-1.66611	1.02409e-27
Lpgat1	1	191717834	191784255	+		Lpgat1	ENSMUSG00000026623	lysophosphatidylglycerol acyltransferase 1 [Source:MGI Symbol;Acc:MGI:2446186]	1682.67	1236.67	2152.33	1745.33	2992		1.36065	0.444293	0.0116126
Gm38037	1	191820370	191821993	-		Gm38037	ENSMUSG00000102840	predicted gene, 38037 [Source:MGI Symbol;Acc:MGI:5611265]	27.6667	4	29	14.6667	13.3333		6.91667	2.79008	0.0393892
Irf6	1	193153111	193172023	+		Irf6	ENSMUSG00000026638	interferon regulatory factor 6 [Source:MGI Symbol;Acc:MGI:1859211]	322.667	79.6667	81.3333	70.6667	104.333		4.05021	2.018	0.0402094
Lamb3	1	193207699	193343878	+		4930570N18Rik	ENSMUSG00000089683	RIKEN cDNA 4930570N18 gene [Source:MGI Symbol;Acc:MGI:1925300]	281.667	171	398.333	396	336		1.64717	0.719992	0.0343784
Hsd11b1	1	193221634	193264075	-		4930570N18Rik	ENSMUSG00000089683	RIKEN cDNA 4930570N18 gene [Source:MGI Symbol;Acc:MGI:1925300]	115.333	480.333	344.667	601.667	237		0.240111	-2.05823	5.78525e-14
G0s2	1	193272161	193273217	-		Lamb3	ENSMUSG00000026639	laminin, beta 3 [Source:MGI Symbol;Acc:MGI:99915]	8.66667	46	64.6667	498.333	11.3333		0.188406	-2.40808	0.000523172
Gm37691	1	193281271	193283843	+		Lamb3	ENSMUSG00000026639	laminin, beta 3 [Source:MGI Symbol;Acc:MGI:99915]	373.667	239.333	464.667	639	599.333		1.56128	0.642731	0.031622
Cr2	1	195136811	195176716	-		Cr2	ENSMUSG00000026616	complement receptor 2 [Source:MGI Symbol;Acc:MGI:88489]	1186.67	2593.67	2497	2544.33	2028		0.457525	-1.12808	0.012805
Gm13391	2	6472000	6478619	+		Gm13391	ENSMUSG00000086109	predicted gene 13391 [Source:MGI Symbol;Acc:MGI:3651526]	108.333	14	12.3333	35	85		7.7381	2.95198	2.08565e-05
Gata3	2	9857078	9890034	-		Gata3	ENSMUSG00000015619	GATA binding protein 3 [Source:MGI Symbol;Acc:MGI:95663]	65.6667	393.667	139.333	131.333	117.333		0.166808	-2.58374	1.62137e-10
Itih5	2	10153571	10256529	+		Itih5	ENSMUSG00000025780	inter-alpha (globulin) inhibitor H5 [Source:MGI Symbol;Acc:MGI:1925751]	47.3333	224	50.3333	74.6667	166.333		0.21131	-2.24257	1.19591e-08
Prkcq	2	11172108	11301222	+		Prkcq	ENSMUSG00000026778	protein kinase C, theta [Source:MGI Symbol;Acc:MGI:97601]	201	985	508	466.667	579		0.204061	-2.29293	2.20995e-10
Pfkfb3	2	11471433	11554077	-		Pfkfb3	ENSMUSG00000026773	6-phosphofructo-2-kinase/fructose-2,6- biphosphatase 3 [Source:MGI Symbol;Acc:MGI:2181202]	3529	1657.33	7443.67	10041.7	11544.7		2.12932	1.0904	3.22222e-06
Gm10851	2	11521706	11530836	+		Pfkfb3	ENSMUSG00000026773	6-phosphofructo-2-kinase/fructose-2,6- biphosphatase 3 [Source:MGI Symbol;Acc:MGI:2181202]	440	42.3333	171	283.667	687.667		10.3937	3.37764	1.32948e-19
Gm37975	2	11532596	11534694	-		Pfkfb3	ENSMUSG00000026773	6-phosphofructo-2-kinase/fructose-2,6- biphosphatase 3 [Source:MGI Symbol;Acc:MGI:2181202]	143	6.33333	12.6667	25.3333	128.667		22.5789	4.49691	3.31155e-08
Il2ra	2	11642807	11693193	+		Il2ra	ENSMUSG00000026770	interleukin 2 receptor, alpha chain [Source:MGI Symbol;Acc:MGI:96549]	1718	277	1391.33	581.333	1491		6.20217	2.63277	0
Gm37881	2	11683126	11683546	+		Il2ra	ENSMUSG00000026770	interleukin 2 receptor, alpha chain [Source:MGI Symbol;Acc:MGI:96549]	14	0.666667	1.33333	0.666667	5		21	4.39232	0.0125873
Il15ra	2	11705290	11734317	+		Il15ra	ENSMUSG00000023206	interleukin 15 receptor, alpha chain [Source:MGI Symbol;Acc:MGI:104644]	829	162.333	1554.33	1054.67	1004.67		5.10678	2.35241	6.98769e-08
Ankrd16	2	11777876	11790329	+		Ankrd16	ENSMUSG00000047909	ankyrin repeat domain 16 [Source:MGI Symbol;Acc:MGI:2444796]	811.667	601.333	499.333	501.333	1170		1.34978	0.432723	0.0266618
Itga8	2	12106632	12301922	-		Itga8	ENSMUSG00000026768	integrin alpha 8 [Source:MGI Symbol;Acc:MGI:109442]	4.33333	57.6667	1.33333	1.66667	0.666667		0.0751445	-3.73419	0.000257304
Cacnb2	2	14603088	14987908	+		Cacnb2	ENSMUSG00000057914	calcium channel, voltage-dependent, beta 2 subunit [Source:MGI Symbol;Acc:MGI:894644]	76.6667	16.3333	9.33333	18.3333	6.33333		4.69388	2.23078	2.80394e-06
Otud1	2	19657752	19660583	+		Otud1	ENSMUSG00000043415	OTU domain containing 1 [Source:MGI Symbol;Acc:MGI:1918448]	295	434	459	520.667	992		0.679724	-0.55698	0.0356418
Enkur	2	21180731	21205365	-		Enkur	ENSMUSG00000026679	enkurin, TRPC channel interacting protein [Source:MGI Symbol;Acc:MGI:1918483]	0.666667	31.3333	0	0.333333	0		0.0212766	-5.55459	0.00133179
Il1f9	2	24186476	24193568	+		Il1f9	ENSMUSG00000044103	interleukin 1 family, member 9 [Source:MGI Symbol;Acc:MGI:2449929]	15	82.3333	87.3333	1764.33	8		0.182186	-2.45651	9.07109e-05
Il1rn	2	24336853	24351494	+		Il1rn	ENSMUSG00000026981	interleukin 1 receptor antagonist [Source:MGI Symbol;Acc:MGI:96547]	991.667	271	1647.33	5119.33	774.667		3.65929	1.87156	0.000120932
Cacna1b	2	24603887	24763152	-		Cacna1b	ENSMUSG00000004113	calcium channel, voltage-dependent, N type, alpha 1B subunit [Source:MGI Symbol;Acc:MGI:88296]	32	4.66667	14.6667	32	24.6667		6.85714	2.77761	0.00902423
Ehmt1	2	24789928	24919614	-		Ehmt1	ENSMUSG00000036893	euchromatic histone methyltransferase 1 [Source:MGI Symbol;Acc:MGI:1924933]	1395	759.667	1324.67	1345.67	2417		1.83633	0.876827	1.88346e-06
Zmynd19	2	24949792	24962075	+		Zmynd19	ENSMUSG00000026974	zinc finger, MYND domain containing 19 [Source:MGI Symbol;Acc:MGI:1914437]	304	471.667	498	288.667	384		0.644523	-0.633696	0.00790041
Sapcd2	2	25372321	25378213	+		Sapcd2	ENSMUSG00000026955	suppressor APC domain containing 2 [Source:MGI Symbol;Acc:MGI:1919330]	13	45	50.6667	16.3333	26.3333		0.288889	-1.79141	0.0296315
Paxx	2	25455141	25461094	-		Paxx	ENSMUSG00000047617	non-homologous end joining factor [Source:MGI Symbol;Acc:MGI:2442831]	170.667	321	326.667	412	484		0.531672	-0.911392	0.000512336
Lcn10	2	25682726	25686081	+		Lcn10	ENSMUSG00000047356	lipocalin 10 [Source:MGI Symbol;Acc:MGI:1925000]	19	0	0	3.33333	1.66667		#DIV/0!	#DIV/0!	0.000189636
Nacc2	2	26055535	26123220	-		Nacc2	ENSMUSG00000026932	nucleus accumbens associated 2, BEN and BTB (POZ) domain containing [Source:MGI Symbol;Acc:MGI:1915241]	453.667	181.667	562.333	535	402.333		2.49725	1.32034	0.000138938
Card9	2	26352176	26360918	-		Card9	ENSMUSG00000026928	caspase recruitment domain family, member 9 [Source:MGI Symbol;Acc:MGI:2685628]	420.667	254.667	284.333	779.333	523		1.65183	0.724067	0.0105388
Agpat2	2	26593057	26604417	-		Egfl7	ENSMUSG00000026921	EGF-like domain 7 [Source:MGI Symbol;Acc:MGI:2449923]	135.667	220.333	440.333	488.333	278		0.615734	-0.699621	0.0210495
Fam69b	2	26628457	26636497	+		Gm20532	ENSMUSG00000092356	predicted gene 20532 [Source:MGI Symbol;Acc:MGI:5141997]	2	22.3333	13.3333	14.3333	9.66667		0.0895522	-3.48113	0.00295001
Lcn4	2	26667674	26671282	-		Lcn4	ENSMUSG00000026919	lipocalin 4 [Source:MGI Symbol;Acc:MGI:102668]	8.33333	52.3333	7	7	24		0.159236	-2.65076	0.010774
Slc2a6	2	27021363	27027998	-		Slc2a6	ENSMUSG00000036067	solute carrier family 2 (facilitated glucose transporter), member 6 [Source:MGI Symbol;Acc:MGI:2443286]	1182	506.333	1951.67	3182.33	2503.33		2.33443	1.22307	0.00304618
Wdr5	2	27515157	27536535	+		Wdr5	ENSMUSG00000026917	WD repeat domain 5 [Source:MGI Symbol;Acc:MGI:2155884]	599.333	812.667	1194.33	1062.33	1211		0.73749	-0.439305	0.0153551
Rxra	2	27676440	27762957	+		Rxra	ENSMUSG00000015846	retinoid X receptor alpha [Source:MGI Symbol;Acc:MGI:98214]	1260.67	898.333	734.667	1000.33	2630		1.40334	0.488864	0.0118397
Fcnb	2	28076378	28084885	-		Fcnb	ENSMUSG00000026835	ficolin B [Source:MGI Symbol;Acc:MGI:1341158]	1	15.3333	33	39.6667	0		0.0652174	-3.9386	0.024109
Olfm1	2	28192992	28230736	+		Olfm1	ENSMUSG00000026833	olfactomedin 1 [Source:MGI Symbol;Acc:MGI:1860437]	81.6667	397	244.667	209	97.3333		0.205709	-2.28132	2.83005e-23
Ak8	2	28700164	28813165	+		Ak8	ENSMUSG00000026807	adenylate kinase 8 [Source:MGI Symbol;Acc:MGI:1916120]	15.3333	51.3333	52.3333	78.6667	29.3333		0.298701	-1.74322	0.00415836
Setx	2	29124181	29182471	+		Setx	ENSMUSG00000043535	senataxin [Source:MGI Symbol;Acc:MGI:2443480]	2710	2049.33	3381.67	2670.33	5426.67		1.32238	0.403138	0.0191176
Ntng2	2	29194541	29253005	-		Ntng2	ENSMUSG00000035513	netrin G2 [Source:MGI Symbol;Acc:MGI:2159341]	720.667	214	912.333	1149.33	653		3.3676	1.75172	6.32759e-14
6530402F18Rik	2	29245107	29253006	-		Ntng2	ENSMUSG00000035513	netrin G2 [Source:MGI Symbol;Acc:MGI:2159341]	712.667	364	1025.33	989.333	523.667		1.95788	0.969289	2.20654e-06
Gpr107	2	31152316	31218775	+		Gpr107	ENSMUSG00000000194	G protein-coupled receptor 107 [Source:MGI Symbol;Acc:MGI:2139054]	1208.33	881.333	1824.67	1592	2012		1.37103	0.455259	0.011569
Hmcn2	2	31314415	31460738	+		Hmcn2	ENSMUSG00000055632	hemicentin 2 [Source:MGI Symbol;Acc:MGI:2677838]	34.3333	8.66667	12	30.3333	33.3333		3.96154	1.98606	0.0392831
Ass1	2	31470207	31520672	+		Ass1	ENSMUSG00000076441	argininosuccinate synthetase 1 [Source:MGI Symbol;Acc:MGI:88090]	432.667	256.667	1173.67	2120.33	1410.33		1.68571	0.75336	0.00652
Qrfp	2	31806166	31810580	-		Qrfp	ENSMUSG00000043102	pyroglutamylated RFamide peptide [Source:MGI Symbol;Acc:MGI:3630329]	51	133.667	40.6667	54.3333	159		0.381546	-1.39007	0.0125239
Aif1l	2	31950139	31973442	+		Aif1l	ENSMUSG00000001864	allograft inflammatory factor 1-like [Source:MGI Symbol;Acc:MGI:1919598]	337.333	23.6667	60.3333	271.667	93		14.2535	3.83325	9.80409e-08
Gm13442	2	31961690	31962547	-		Aif1l	ENSMUSG00000001864	allograft inflammatory factor 1-like [Source:MGI Symbol;Acc:MGI:1919598]	12.6667	0.666667	2	7.66667	4.66667		19	4.24793	0.0178438
Fam78a	2	32050055	32084857	-		Nup214	ENSMUSG00000001855	nucleoporin 214 [Source:MGI Symbol;Acc:MGI:1095411]	574.667	1062	910.667	810.667	2019		0.541117	-0.885986	9.81662e-05
Lcn2	2	32384633	32388252	-		Lcn2	ENSMUSG00000026822	lipocalin 2 [Source:MGI Symbol;Acc:MGI:96757]	39	170.667	970.667	15533.7	18		0.228516	-2.12964	2.88344e-10
Fam102a	2	32535332	32569756	+		Fam102a	ENSMUSG00000039157	family with sequence similarity 102, member A [Source:MGI Symbol;Acc:MGI:2138935]	731.667	1337	1991.33	1511	2363		0.547245	-0.869741	3.91575e-08
St6galnac6	2	32599709	32620806	+		St6galnac6	ENSMUSG00000026811	ST6 (alpha-N-acetyl-neuraminyl-2,3-beta- galactosyl-1,3)-N-acetylgalactosaminide alpha-2,6- sialyltransferase 6 [Source:MGI Symbol;Acc:MGI:1355316]	590	244.667	493.667	746.333	464.667		2.41144	1.2699	6.57007e-05
Eng	2	32646595	32682669	+		Eng	ENSMUSG00000026814	endoglin [Source:MGI Symbol;Acc:MGI:95392]	544.667	145	163.333	460.333	272		3.75632	1.90932	2.17772e-10
Sh2d3c	2	32721055	32755512	+		Sh2d3c	ENSMUSG00000059013	SH2 domain containing 3C [Source:MGI Symbol;Acc:MGI:1351631]	557.333	1159.33	1833.33	2975.33	2431.67		0.480736	-1.05668	1.46753e-08
Stxbp1	2	32787602	32847245	-		Stxbp1	ENSMUSG00000026797	syntaxin binding protein 1 [Source:MGI Symbol;Acc:MGI:107363]	615	119.667	360.333	585.667	380.667		5.13928	2.36157	4.21329e-10
Lrsam1	2	32925216	32961614	-		Fam129b	ENSMUSG00000026796	family with sequence similarity 129, member B [Source:MGI Symbol;Acc:MGI:2442910]	336	192.333	364.667	371	407.667		1.74697	0.804852	0.0178752
Angptl2	2	33216069	33247717	+		Ralgps1	ENSMUSG00000038831	Ral GEF with PH domain and SH3 binding motif 1 [Source:MGI Symbol;Acc:MGI:1922008]	19	47.3333	30.6667	48.6667	33		0.401408	-1.31686	0.0229897
Hspa5	2	34771970	34777547	+		Hspa5	ENSMUSG00000026864	heat shock protein 5 [Source:MGI Symbol;Acc:MGI:95835]	2138.33	3976	12848	9966.67	15290		0.53781	-0.894831	0.000966984
Traf1	2	34941750	34961772	-		Traf1	ENSMUSG00000026875	TNF receptor-associated factor 1 [Source:MGI Symbol;Acc:MGI:101836]	4188	2139	9369.33	12686.3	13593		1.95792	0.969325	0.000307394
Hc	2	34983331	35061438	-		Hc	ENSMUSG00000026874	hemolytic complement [Source:MGI Symbol;Acc:MGI:96031]	94	9.33333	38	18.6667	18.6667		10.0714	3.3322	2.52737e-05
Gsn	2	35256380	35307892	+		Gsn	ENSMUSG00000026879	gelsolin [Source:MGI Symbol;Acc:MGI:95851]	624.333	1155	1837.33	2550	2205		0.540548	-0.887505	2.62009e-05
Dab2ip	2	35558266	35730994	+		Gm13446	ENSMUSG00000086555	predicted gene 13446 [Source:MGI Symbol;Acc:MGI:3649869]	172	421	140.667	142.333	127		0.408551	-1.29141	0.00130024
Rbm18	2	36116079	36136773	-		Rbm18	ENSMUSG00000026889	RNA binding motif protein 18 [Source:MGI Symbol;Acc:MGI:1915139]	428.667	616.333	596.333	564.333	699.333		0.695511	-0.523855	0.011919
Ptgs1	2	36230426	36252272	+		Ptgs1	ENSMUSG00000047250	prostaglandin-endoperoxide synthase 1 [Source:MGI Symbol;Acc:MGI:97797]	1033	716	131	211	881.667		1.44274	0.528809	0.0152099
Zbtb26	2	37432168	37443135	-		Zbtb6	ENSMUSG00000066798	zinc finger and BTB domain containing 6 [Source:MGI Symbol;Acc:MGI:2442998]	348.333	201	146.667	156	370		1.733	0.793273	0.0418439
Rabgap1	2	37443279	37566454	+		Rabgap1	ENSMUSG00000035437	RAB GTPase activating protein 1 [Source:MGI Symbol;Acc:MGI:2385139]	1183.33	866	1313.67	1034	1345.67		1.36644	0.450418	0.0111108
Nek6	2	38511643	38594606	+		Nek6	ENSMUSG00000026749	NIMA (never in mitosis gene a)-related expressed kinase 6 [Source:MGI Symbol;Acc:MGI:1891638]	1537	778.667	2545.33	4064	3032		1.97389	0.981039	1.34026e-06
Arpc5l	2	39005348	39015877	+		Wdr38	ENSMUSG00000035295	WD repeat domain 38 [Source:MGI Symbol;Acc:MGI:1923896]	809.667	1119	2849	2963.67	3759		0.723563	-0.46681	0.0350779
Scai	2	39066214	39190734	-		Scai	ENSMUSG00000035236	suppressor of cancer cell invasion [Source:MGI Symbol;Acc:MGI:2443716]	1185.67	526.333	732.333	698	1148.33		2.25269	1.17165	1.88346e-12
Kynu	2	43555329	43682715	+		Kynu	ENSMUSG00000026866	kynureninase (L-kynurenine hydrolase) [Source:MGI Symbol;Acc:MGI:1918039]	962	521	1390.67	1089.67	1101.33		1.84645	0.884754	0.00120467
Arhgap15	2	43748824	44395953	+		Arhgap15	ENSMUSG00000049744	Rho GTPase activating protein 15 [Source:MGI Symbol;Acc:MGI:1923367]	751	1286.33	2277	2070.33	1640.67		0.58383	-0.77638	0.0450232
Zeb2	2	44983632	45117395	-		Zeb2	ENSMUSG00000026872	zinc finger E-box binding homeobox 2 [Source:MGI Symbol;Acc:MGI:1344407]	2659.33	1694.67	2669.33	3085	3176.33		1.56924	0.650063	0.00542845
Mbd5	2	48949508	49325405	+		Orc4	ENSMUSG00000026761	origin recognition complex, subunit 4 [Source:MGI Symbol;Acc:MGI:1347043]	597.667	318.667	459.667	384.333	427.667		1.87552	0.907293	0.000124121
Rnd3	2	51130438	51149111	-		Rnd3	ENSMUSG00000017144	Rho family GTPase 3 [Source:MGI Symbol;Acc:MGI:1921444]	340	798.667	440.667	276.667	347		0.425709	-1.23206	2.24406e-07
Arl5a	2	52397951	52424901	-		Arl5a	ENSMUSG00000036093	ADP-ribosylation factor-like 5A [Source:MGI Symbol;Acc:MGI:1922673]	2115.67	1168	2858	2944.67	4026.33		1.81136	0.857072	3.94004e-07
A430018G15Rik	2	52425012	52434885	+		A430018G15Rik	ENSMUSG00000085315	RIKEN cDNA A430018G15 gene [Source:MGI Symbol;Acc:MGI:3040796]	100.667	37.6667	90.6667	100	53.3333		2.67257	1.41823	0.0126356
Cacnb4	2	52428320	52676831	-		A430018G15Rik	ENSMUSG00000085315	RIKEN cDNA A430018G15 gene [Source:MGI Symbol;Acc:MGI:3040796]	294	72.6667	204.333	263.333	113		4.04587	2.01645	4.10899e-13
Fmnl2	2	52857860	53134202	+		Fmnl2	ENSMUSG00000036053	formin-like 2 [Source:MGI Symbol;Acc:MGI:1918659]	1568	842.333	1634.33	1300.33	2915		1.8615	0.896462	0.000377205
Gpd2	2	57237635	57370719	+		A930012O16Rik	ENSMUSG00000054181	RIKEN cDNA A930012O16 gene [Source:MGI Symbol;Acc:MGI:2442255]	2311.33	1240.67	1568.33	2125	2304.67		1.86298	0.89761	0.0453747
Ermn	2	58045113	58052864	-		Galnt5	ENSMUSG00000026828	UDP-N-acetyl-alpha-D- galactosamine:polypeptide N- acetylgalactosaminyltransferase 5 [Source:MGI Symbol;Acc:MGI:2179403]	10	0	0	0	0.333333		#DIV/0!	#DIV/0!	0.00696368
Gm13546	2	58164001	58177063	+		Cytip	ENSMUSG00000026832	cytohesin 1 interacting protein [Source:MGI Symbol;Acc:MGI:2183535]	546.667	41.3333	999.333	783.667	1241		13.2258	3.72528	0
Acvr1c	2	58267453	58357895	-		Acvr1c	ENSMUSG00000026834	activin A receptor, type IC [Source:MGI Symbol;Acc:MGI:2661081]	47	3.66667	12.6667	5.33333	58		12.8182	3.68012	0.00913347
Ccdc148	2	58821697	59160683	-		Ccdc148	ENSMUSG00000036641	coiled-coil domain containing 148 [Source:MGI Symbol;Acc:MGI:3039583]	35.3333	206.333	21.6667	17.6667	66.6667		0.171244	-2.54588	1.31397e-06
Dapl1	2	59484653	59505020	+		Dapl1	ENSMUSG00000026989	death associated protein-like 1 [Source:MGI Symbol;Acc:MGI:1923997]	6.33333	130	18.6667	35.3333	88.3333		0.048718	-4.3594	0.0223623
Tanc1	2	59612042	59846149	+		Tanc1	ENSMUSG00000035168	tetratricopeptide repeat, ankyrin repeat and coiled-coil containing 1 [Source:MGI Symbol;Acc:MGI:1914110]	159.667	267.333	95.3333	82	163		0.597257	-0.743577	0.0192917
Ly75	2	60292103	60383303	-		Ly75	ENSMUSG00000026980	lymphocyte antigen 75 [Source:MGI Symbol;Acc:MGI:106662]	2757	614	5096	3849.33	3786.33		4.49023	2.16679	1.065e-42
Gm13571	2	60338188	60371234	+		Ly75	ENSMUSG00000026980	lymphocyte antigen 75 [Source:MGI Symbol;Acc:MGI:106662]	102.333	20.3333	165	114.333	105.667		5.03279	2.33136	5.67173e-09
Fap	2	62500943	62574075	-		Fap	ENSMUSG00000000392	fibroblast activation protein [Source:MGI Symbol;Acc:MGI:109608]	54	14.3333	10.6667	17	56		3.76744	1.91359	0.0329445
Ifih1	2	62595798	62646255	-		Ifih1	ENSMUSG00000026896	interferon induced with helicase C domain 1 [Source:MGI Symbol;Acc:MGI:1918836]	1033.67	649.333	1454.33	1257.67	982		1.59189	0.67074	0.014411
Gca	2	62664285	62694109	+		Gca	ENSMUSG00000026893	grancalcin [Source:MGI Symbol;Acc:MGI:1918521]	825.667	194	817.667	902.667	1208.67		4.25601	2.0895	4.19953e-11
Kcnh7	2	62693414	63184287	-		Gca	ENSMUSG00000026893	grancalcin [Source:MGI Symbol;Acc:MGI:1918521]	219.333	37	100	124.667	201		5.92793	2.56753	1.88108e-05
Cobll1	2	65088339	65239403	-		Cobll1	ENSMUSG00000034903	Cobl-like 1 [Source:MGI Symbol;Acc:MGI:2442894]	386	707	1033	797.333	608.333		0.545969	-0.873109	0.00483804
Scn3a	2	65457118	65567627	-		Scn3a	ENSMUSG00000057182	sodium channel, voltage-gated, type III, alpha [Source:MGI Symbol;Acc:MGI:98249]	17.3333	83.3333	4.66667	24.3333	44.3333		0.208	-2.26534	0.000264603
Cers6	2	68861441	69114282	+		Cers6	ENSMUSG00000027035	ceramide synthase 6 [Source:MGI Symbol;Acc:MGI:2442564]	1778.67	831	1263	1495	2156.67		2.14039	1.09788	0.00103923
Nostrin	2	69135800	69189330	+		Nostrin	ENSMUSG00000034738	nitric oxide synthase trafficker [Source:MGI Symbol;Acc:MGI:3606242]	875.667	275.667	381.333	974.333	1305		3.17654	1.66746	4.56123e-10
Bbs5	2	69647171	69667571	+		Bbs5	ENSMUSG00000063145	Bardet-Biedl syndrome 5 (human) [Source:MGI Symbol;Acc:MGI:1919819]	66.3333	25	23	15.6667	29		2.65333	1.40781	0.00893521
Klhl41	2	69670120	69684230	+		Klhl41	ENSMUSG00000075307	kelch-like 41 [Source:MGI Symbol;Acc:MGI:2683854]	29.6667	4.66667	2	1	4		6.35714	2.66838	0.0134789
Klhl23	2	69821944	69836651	+		Klhl23	ENSMUSG00000042155	kelch-like 23 [Source:MGI Symbol;Acc:MGI:2683536]	7.33333	61.6667	18	8	1.66667		0.118919	-3.07195	0.00209434
Myo3b	2	70039126	70429198	+		Gm13631	ENSMUSG00000086132	predicted gene 13631 [Source:MGI Symbol;Acc:MGI:3650760]	97.6667	32.6667	103.333	81.3333	12.6667		2.9898	1.58005	0.00258356
Erich2	2	70508819	70540884	+		Gad1os	ENSMUSG00000087264	glutamate decarboxylase 1, opposite strand [Source:MGI Symbol;Acc:MGI:1916236]	13	1.33333	4	5	0		9.75	3.2854	0.0232811
Itga6	2	71745616	71858416	+		Itga6	ENSMUSG00000027111	integrin alpha 6 [Source:MGI Symbol;Acc:MGI:96605]	447.667	792	737.333	483.333	789		0.565236	-0.823076	0.00551691
Rapgef4	2	71981240	72257474	+		Rapgef4	ENSMUSG00000049044	Rap guanine nucleotide exchange factor (GEF) 4 [Source:MGI Symbol;Acc:MGI:1917723]	87	254.333	57.3333	53.6667	618.333		0.342071	-1.54763	0.00732153
Gpr155	2	73341506	73386572	-		Gpr155	ENSMUSG00000041762	G protein-coupled receptor 155 [Source:MGI Symbol;Acc:MGI:1915776]	141.667	442.333	199.667	105	717		0.320271	-1.64263	2.95136e-07
Fkbp7	2	76663044	76673116	-		Fkbp7	ENSMUSG00000002732	FK506 binding protein 7 [Source:MGI Symbol;Acc:MGI:1336879]	23	62	15.3333	22.3333	25.6667		0.370968	-1.43063	0.00460292
Ttn	2	76703980	76982547	-		Ttn	ENSMUSG00000051747	titin [Source:MGI Symbol;Acc:MGI:98864]	144.667	37	69.6667	76	70.3333		3.90991	1.96714	0.00551691
Sestd1	2	77180340	77280592	-		Sestd1	ENSMUSG00000042272	SEC14 and spectrin domains 1 [Source:MGI Symbol;Acc:MGI:1916262]	751	282.667	1199	374.667	345.667		2.65684	1.40971	0.0283664
Dnajc10	2	80315466	80354043	+		Dnajc10	ENSMUSG00000027006	DnaJ heat shock protein family (Hsp40) member C10 [Source:MGI Symbol;Acc:MGI:1914111]	1392.67	954	2081.33	2374	2230		1.45982	0.545789	0.0122294
Ctnnd1	2	84600071	84650765	-		Ctnnd1	ENSMUSG00000034101	catenin (cadherin associated protein), delta 1 [Source:MGI Symbol;Acc:MGI:105100]	1120	563.333	534.667	459	991.667		1.98817	0.991438	6.77529e-09
Gm28635	2	84601439	84678041	-		Ctnnd1	ENSMUSG00000034101	catenin (cadherin associated protein), delta 1 [Source:MGI Symbol;Acc:MGI:105100]	958.333	477.333	477.667	390.333	812.667		2.00768	1.00553	9.28087e-09
Slc43a3	2	84936579	84958509	+		Slc43a3	ENSMUSG00000027074	solute carrier family 43, member 3 [Source:MGI Symbol;Acc:MGI:1931054]	632.667	388.333	951.667	661.667	672.667		1.62918	0.70415	0.0352053
Prg2	2	84980461	84983632	+		Prg2	ENSMUSG00000027073	proteoglycan 2, bone marrow [Source:MGI Symbol;Acc:MGI:103294]	55.3333	211.667	21.6667	302.667	99.3333		0.261417	-1.93557	3.2752e-06
Prg3	2	84988215	84993886	+		Prg3	ENSMUSG00000027072	proteoglycan 3 [Source:MGI Symbol;Acc:MGI:1858200]	5	39.6667	1509.67	37.6667	7.33333		0.12605	-2.98793	0.00192361
Aplnr	2	85136225	85139923	+		Aplnr	ENSMUSG00000044338	apelin receptor [Source:MGI Symbol;Acc:MGI:1346086]	0	7.33333	0	2.33333	0		0	#NUM!	0.0310542
Lrp4	2	91457511	91513779	+		Lrp4	ENSMUSG00000027253	low density lipoprotein receptor-related protein 4 [Source:MGI Symbol;Acc:MGI:2442252]	419.667	223	46.6667	102.333	156		1.88191	0.9122	0.000836853
Ckap5	2	91526762	91620664	+		Ckap5	ENSMUSG00000040549	cytoskeleton associated protein 5 [Source:MGI Symbol;Acc:MGI:1923036]	1541	1113	1399.33	1027	1663.33		1.38455	0.469413	0.00385504
Phf21a	2	92093117	92364666	+		Gm13780	ENSMUSG00000087197	predicted gene 13780 [Source:MGI Symbol;Acc:MGI:3650707]	1411.67	933.667	1664	1757	2334.33		1.51196	0.59642	0.0423138
Chst1	2	92599707	92615250	+		Chst1	ENSMUSG00000027221	carbohydrate (keratan sulfate Gal-6) sulfotransferase 1 [Source:MGI Symbol;Acc:MGI:1924219]	5.66667	99	14.3333	15.6667	42		0.0572391	-4.12686	1.01019e-07
Gm13889	2	93955810	93957201	-		Gm13889	ENSMUSG00000087006	predicted gene 13889 [Source:MGI Symbol;Acc:MGI:3652053]	58.3333	5.33333	18	15.3333	180		10.9375	3.45121	0.0178875
Rag1	2	101638282	101649501	-		B230118H07Rik	ENSMUSG00000027165	RIKEN cDNA B230118H07 gene [Source:MGI Symbol;Acc:MGI:1915420]	77	14.6667	1.66667	34.3333	75		5.25	2.39232	0.0196155
Prr5l	2	101714285	101883027	-		Prr5l	ENSMUSG00000032841	proline rich 5 like [Source:MGI Symbol;Acc:MGI:1919696]	1680.33	593.667	1031	1437.33	1636.33		2.83043	1.50102	5.89058e-07
Ldlrad3	2	101950203	102186385	-		Ldlrad3	ENSMUSG00000048058	low density lipoprotein receptor class A domain containing 3 [Source:MGI Symbol;Acc:MGI:2138856]	205.667	334.667	343.667	286	206.667		0.614542	-0.702417	0.00298996
Pamr1	2	102550012	102643041	+		Pamr1	ENSMUSG00000027188	peptidase domain containing associated with muscle regeneration 1 [Source:MGI Symbol;Acc:MGI:2445082]	43	1	1.66667	4.66667	1.66667		43	5.42626	2.11781e-05
Slc1a2	2	102658659	102790784	+		Slc1a2	ENSMUSG00000005089	solute carrier family 1 (glial high affinity glutamate transporter), member 2 [Source:MGI Symbol;Acc:MGI:101931]	4.66667	20.3333	12.6667	9	6		0.229508	-2.12338	0.0404911
Tcp11l1	2	104657288	104712169	-		Cstf3	ENSMUSG00000027176	cleavage stimulation factor, 3' pre-RNA, subunit 3 [Source:MGI Symbol;Acc:MGI:1351825]	293.333	106	125.667	230.333	148		2.7673	1.46848	8.65948e-06
Depdc7	2	104721784	104742878	-		Depdc7	ENSMUSG00000027173	DEP domain containing 7 [Source:MGI Symbol;Acc:MGI:2139258]	257.667	136.667	57.6667	84.6667	189		1.88537	0.914844	0.0232408
Rcn1	2	105386291	105399319	-		Rcn1	ENSMUSG00000005973	reticulocalbin 1 [Source:MGI Symbol;Acc:MGI:104559]	149.333	333.333	229.667	242	254		0.448	-1.15843	7.13143e-07
Lpcat4	2	112239468	112247111	+		Lpcat4	ENSMUSG00000027134	lysophosphatidylcholine acyltransferase 4 [Source:MGI Symbol;Acc:MGI:2138993]	138.333	424	577.667	274.333	293		0.326258	-1.61592	2.45573e-11
Fmn1	2	113327736	113716767	+		Fmn1	ENSMUSG00000044042	formin 1 [Source:MGI Symbol;Acc:MGI:101815]	594	145.333	81	134	464		4.08716	2.0311	1.20578e-07
Spred1	2	117121374	117182279	+		Spred1	ENSMUSG00000027351	sprouty protein with EVH-1 domain 1, related sequence [Source:MGI Symbol;Acc:MGI:2150016]	1646	822	942.667	1555.67	2528.33		2.00243	1.00175	0.0320625
Gm29233	2	118123451	118124047	-		Thbs1	ENSMUSG00000040152	thrombospondin 1 [Source:MGI Symbol;Acc:MGI:98737]	115.667	17	89.3333	481.667	10		6.80392	2.76637	0.0169645
Plcb2	2	118707517	118728438	-		Plcb2	ENSMUSG00000040061	phospholipase C, beta 2 [Source:MGI Symbol;Acc:MGI:107465]	686	1275.33	1637.67	1264	1839.67		0.537899	-0.894594	0.00054704
Inafm2	2	118745758	118748810	+		Inafm2	ENSMUSG00000074918	InaF motif containing 2 [Source:MGI Symbol;Acc:MGI:1915354]	318	456.667	366.333	348.667	611.667		0.69635	-0.522115	0.0100384
Chst14	2	118926496	118928585	+		Chst14	ENSMUSG00000074916	carbohydrate (N-acetylgalactosamine 4-0) sulfotransferase 14 [Source:MGI Symbol;Acc:MGI:1919386]	157.333	78	171.333	148	191		2.01709	1.01228	0.0223623
Gm14137	2	119174509	119177575	+		Dnajc17	ENSMUSG00000034278	DnaJ heat shock protein family (Hsp40) member C17 [Source:MGI Symbol;Acc:MGI:1916658]	379.333	42.3333	320	279.333	95		8.96063	3.1636	6.24118e-22
Dll4	2	119325784	119335962	+		Gm14207	ENSMUSG00000074912	predicted gene 14207 [Source:MGI Symbol;Acc:MGI:3649550]	264.667	55.6667	93.6667	358.667	106.333		4.75449	2.24929	6.30541e-07
Exd1	2	119516505	119547627	-		Exd1	ENSMUSG00000048647	exonuclease 3'-5' domain containing 1 [Source:MGI Symbol;Acc:MGI:3045306]	201.333	13.3333	46.6667	48.6667	67.3333		15.1	3.91648	6.49858e-08
Mapkbp1	2	119972699	120027408	+		Mapkbp1	ENSMUSG00000033902	mitogen-activated protein kinase binding protein 1 [Source:MGI Symbol;Acc:MGI:1347004]	630	262.667	684.667	380	509		2.39848	1.26212	2.14795e-07
Gm13999	2	120024807	120027453	-		Mapkbp1	ENSMUSG00000033902	mitogen-activated protein kinase binding protein 1 [Source:MGI Symbol;Acc:MGI:1347004]	60	23.3333	60.3333	35.6667	46.3333		2.57143	1.36257	0.0209643
Pla2g4f	2	120299957	120314165	-		Pla2g4f	ENSMUSG00000046971	phospholipase A2, group IVF [Source:MGI Symbol;Acc:MGI:2685493]	371.333	36	67	163.667	651.667		10.3148	3.36665	3.58615e-09
Vps39	2	120316461	120353137	-		Vps39	ENSMUSG00000027291	VPS39 HOPS complex subunit [Source:MGI Symbol;Acc:MGI:2443189]	1602.67	1000.67	1607.67	1806.67	2632		1.6016	0.679513	0.000453556
Haus2	2	120609383	120621560	+		Lrrc57	ENSMUSG00000027286	leucine rich repeat containing 57 [Source:MGI Symbol;Acc:MGI:1913856]	385.333	539	442.333	364.667	448.667		0.714904	-0.484178	0.0216528
Stard9	2	120629126	120731895	+		Stard9	ENSMUSG00000033705	START domain containing 9 [Source:MGI Symbol;Acc:MGI:3045258]	824	411.667	192.333	299	566.333		2.00162	1.00117	2.71499e-05
Ttbk2	2	120732816	120850604	-		Cdan1	ENSMUSG00000027284	congenital dyserythropoietic anemia, type I (human) [Source:MGI Symbol;Acc:MGI:1916218]	482.667	268.667	282.667	223.667	369.667		1.79653	0.84521	0.0058192
Ell3	2	121439010	121444278	-		Ell3	ENSMUSG00000027246	elongation factor RNA polymerase II-like 3 [Source:MGI Symbol;Acc:MGI:2673679]	216.333	396.667	548	471.667	513.667		0.545378	-0.874671	0.00396832
Casc4	2	121866970	121936220	+		Casc4	ENSMUSG00000060227	cancer susceptibility candidate 4 [Source:MGI Symbol;Acc:MGI:2443129]	96	203	75	57.3333	133.333		0.472906	-1.08037	2.09464e-05
Spg11	2	122053520	122118386	-		Eif3j1	ENSMUSG00000027236	eukaryotic translation initiation factor 3, subunit J1 [Source:MGI Symbol;Acc:MGI:1925905]	1516.33	819.333	1249.67	1261	1985		1.85069	0.888065	8.95343e-07
Sord	2	122234749	122265340	+		Sord	ENSMUSG00000027227	sorbitol dehydrogenase [Source:MGI Symbol;Acc:MGI:98266]	126	308.667	179	235.333	155.333		0.408207	-1.29263	1.6966e-06
Gatm	2	122594467	122611303	-		Gatm	ENSMUSG00000027199	glycine amidinotransferase (L- arginine:glycine amidinotransferase) [Source:MGI Symbol;Acc:MGI:1914342]	113	393	321.333	65.3333	103.333		0.287532	-1.79821	2.64058e-07
Sema6d	2	124089969	124667770	+		Sema6d	ENSMUSG00000027200	sema domain, transmembrane domain (TM), and cytoplasmic domain, (semaphorin) 6D [Source:MGI Symbol;Acc:MGI:2387661]	1459.33	856.667	208.667	433.667	1643.33		1.7035	0.768504	0.017461
Hdc	2	126593667	126619299	-		Hdc	ENSMUSG00000027360	histidine decarboxylase [Source:MGI Symbol;Acc:MGI:96062]	87.6667	374.333	739.333	1005.67	24.6667		0.234194	-2.09422	0.00359115
Dusp2	2	127336159	127338376	+		Dusp2	ENSMUSG00000027368	dual specificity phosphatase 2 [Source:MGI Symbol;Acc:MGI:101911]	701.333	1354	1973.67	3191.33	2768		0.517971	-0.949056	0.00594887
Kcnip3	2	127456498	127522094	-		Kcnip3	ENSMUSG00000079056	Kv channel interacting protein 3, calsenilin [Source:MGI Symbol;Acc:MGI:1929258]	23	448.333	18.3333	47.6667	38.6667		0.0513011	-4.28487	1.03098e-19
Gm14005	2	128178319	128502765	-		Gm14005	ENSMUSG00000074813	predicted gene 14005 [Source:MGI Symbol;Acc:MGI:3652191]	45.6667	89.6667	132.667	110	41		0.509294	-0.97343	0.0212019
Gm14029	2	129182482	129183947	-		Gm14029	ENSMUSG00000086652	predicted gene 14029 [Source:MGI Symbol;Acc:MGI:3650450]	62.3333	174.667	33.3333	37.3333	42.6667		0.35687	-1.48653	0.000192825
Il1bos	2	129369897	129375748	+		Il1b	ENSMUSG00000027398	interleukin 1 beta [Source:MGI Symbol;Acc:MGI:96543]	87.6667	31.3333	11.6667	19.3333	9		2.79787	1.48433	0.0230205
Mrps26	2	130563742	130568695	+		4930473A02Rik	ENSMUSG00000060029	RIKEN cDNA 4930473A02 gene [Source:MGI Symbol;Acc:MGI:2447823]	214.333	324.667	820.667	765.333	833		0.660164	-0.599103	0.0143085
Slc4a11	2	130684113	130697519	-		Slc4a11	ENSMUSG00000074796	solute carrier family 4, sodium bicarbonate transporter-like, member 11 [Source:MGI Symbol;Acc:MGI:2138987]	155.667	54	11.3333	38.3333	49.3333		2.88272	1.52743	0.00953738
4930402H24Rik	2	130706200	130906406	-		4930402H24Rik	ENSMUSG00000027309	RIKEN cDNA 4930402H24 gene [Source:MGI Symbol;Acc:MGI:1923029]	602	351	354.667	387.667	498		1.7151	0.778292	0.00729273
Rnf24	2	131298064	131352892	-		Pank2	ENSMUSG00000037514	pantothenate kinase 2 [Source:MGI Symbol;Acc:MGI:1921700]	754.667	393	474.333	516.333	589.333		1.92027	0.94131	0.0389395
Smox	2	131491496	131525922	+		Smox	ENSMUSG00000027333	spermine oxidase [Source:MGI Symbol;Acc:MGI:2445356]	1103	450.667	1246.33	1329.67	1172.33		2.44749	1.2913	1.62436e-05
Erv3	2	131853678	131859747	-		Erv3	ENSMUSG00000037482	endogenous retroviral sequence 3 [Source:MGI Symbol;Acc:MGI:1919245]	14	0	0.333333	0.666667	2.33333		#DIV/0!	#DIV/0!	0.00266204
Prnp	2	131909928	131938429	+		Prnp	ENSMUSG00000079037	prion protein [Source:MGI Symbol;Acc:MGI:97769]	1231.33	458.333	1114	1407.67	1886		2.68655	1.42575	2.73969e-14
Prn	2	131909957	131956130	+		Prnp	ENSMUSG00000079037	prion protein [Source:MGI Symbol;Acc:MGI:97769]	42	16.6667	21.3333	32	42.6667		2.52	1.33342	0.0406641
Rassf2	2	131989415	132030258	-		Rassf2	ENSMUSG00000027339	Ras association (RalGDS/AF-6) domain family member 2 [Source:MGI Symbol;Acc:MGI:2442060]	4289	2106.33	8090.67	8668.67	12097		2.03624	1.02591	6.36741e-12
Plcb1	2	134786067	135475258	+		Plcb1	ENSMUSG00000051177	phospholipase C, beta 1 [Source:MGI Symbol;Acc:MGI:97613]	40.6667	7.66667	11.3333	16.6667	0.666667		5.30435	2.40718	0.000588016
Plcb4	2	135659011	136014593	+		Plcb4	ENSMUSG00000039943	phospholipase C, beta 4 [Source:MGI Symbol;Acc:MGI:107464]	90	194.667	45	43.6667	54.3333		0.462329	-1.11301	0.00264373
Slx4ip	2	136891218	137071950	+		Mkks	ENSMUSG00000027274	McKusick-Kaufman syndrome [Source:MGI Symbol;Acc:MGI:1891836]	516.333	229.667	316	307.667	422.667		2.24819	1.16876	1.29576e-05
Jag1	2	137081456	137116644	-		Jag1	ENSMUSG00000027276	jagged 1 [Source:MGI Symbol;Acc:MGI:1095416]	425	183.333	134	184.667	238.667		2.31818	1.21299	0.00219284
Bfsp1	2	143826528	143863173	-		Bfsp1	ENSMUSG00000027420	beaded filament structural protein 1, in lens-CP94 [Source:MGI Symbol;Acc:MGI:101770]	62.6667	10	69.6667	111	14		6.26667	2.6477	0.00016283
Dstn	2	143915320	143943324	+		Dstn	ENSMUSG00000015932	destrin [Source:MGI Symbol;Acc:MGI:1929270]	730.667	516.667	1657.67	2072.33	1431		1.41419	0.49998	0.029489
Cfap61	2	145934784	146215039	+		Crnkl1	ENSMUSG00000001767	Crn, crooked neck-like 1 (Drosophila) [Source:MGI Symbol;Acc:MGI:1914127]	1.33333	23.3333	0.666667	0	0		0.0571429	-4.12928	0.00549466
Insm1	2	146221921	146225020	+		Insm1	ENSMUSG00000068154	insulinoma-associated 1 [Source:MGI Symbol;Acc:MGI:1859980]	109	40.6667	100.333	100.667	149.333		2.68033	1.42241	0.00641164
Ralgapa2	2	146239879	146512026	-		Ralgapa2	ENSMUSG00000037110	Ral GTPase activating protein, alpha subunit 2 (catalytic) [Source:MGI Symbol;Acc:MGI:3036245]	1364.67	637.667	752.333	827.667	1054		2.14009	1.09767	0.00032103
Nkx2-4	2	147083316	147085445	-		Nkx2-4	ENSMUSG00000054160	NK2 homeobox 4 [Source:MGI Symbol;Acc:MGI:97349]	8.33333	0	0	0	5.66667		#DIV/0!	#DIV/0!	0.0189722
Cd93	2	148436640	148443563	-		Cd93	ENSMUSG00000027435	CD93 antigen [Source:MGI Symbol;Acc:MGI:106664]	1150	374.667	1956.33	2328	1468.33		3.0694	1.61795	1.50537e-09
Cst7	2	150570415	150578944	+		Cst7	ENSMUSG00000068129	cystatin F (leukocystatin) [Source:MGI Symbol;Acc:MGI:1298217]	46.6667	318.333	251.667	383.333	96		0.146597	-2.77007	4.20228e-16
Apmap	2	150583080	150608567	-		Apmap	ENSMUSG00000033096	adipocyte plasma membrane associated protein [Source:MGI Symbol;Acc:MGI:1919131]	340.333	578.333	554.333	419.667	494.667		0.588473	-0.764953	0.000367274
Gm14161	2	152549714	152553932	-		Gm14161	ENSMUSG00000084935	predicted gene 14161 [Source:MGI Symbol;Acc:MGI:3649234]	1	18.6667	5.33333	5.66667	8.66667		0.0535714	-4.22239	0.00986798
Rem1	2	152626951	152635198	+		Rem1	ENSMUSG00000000359	rad and gem related GTP binding protein 1 [Source:MGI Symbol;Acc:MGI:1097696]	11	36	8	54	59.3333		0.305556	-1.71049	0.0164391
Bcl2l1	2	152780668	152831728	-		Bcl2l1	ENSMUSG00000007659	BCL2-like 1 [Source:MGI Symbol;Acc:MGI:88139]	739.667	387.667	1142.33	1631	1368.67		1.908	0.932059	6.23738e-07
Dusp15	2	152940997	152951698	-		Dusp15	ENSMUSG00000042662	dual specificity phosphatase-like 15 [Source:MGI Symbol;Acc:MGI:1934928]	29.3333	0.666667	2.33333	2.66667	7.33333		44	5.45943	0.000272004
Ttll9	2	152962485	153008482	+		Ttll9	ENSMUSG00000074673	tubulin tyrosine ligase-like family, member 9 [Source:MGI Symbol;Acc:MGI:1913589]	89.3333	4	57.6667	78	10.6667		22.3333	4.48113	4.45126e-12
Gm14199	2	152990017	152991631	-		Ttll9	ENSMUSG00000074673	tubulin tyrosine ligase-like family, member 9 [Source:MGI Symbol;Acc:MGI:1913589]	20.6667	2	58.3333	42.6667	8.33333		10.3333	3.36923	0.00514739
Bpifa6	2	153974945	154000495	+		Bpifa6	ENSMUSG00000078998	BPI fold containing family A, member 6 [Source:MGI Symbol;Acc:MGI:3647736]	0	6.33333	0.666667	2.33333	0		0	#NUM!	0.036788
Acss2	2	155517948	155585724	+		Ggt7	ENSMUSG00000027603	gamma-glutamyltransferase 7 [Source:MGI Symbol;Acc:MGI:1913385]	265.333	503	375.333	229	374.667		0.527502	-0.922752	0.000181339
Epb41l1	2	156420909	156543214	+		Epb41l1	ENSMUSG00000027624	erythrocyte membrane protein band 4.1 like 1 [Source:MGI Symbol;Acc:MGI:103010]	733.667	192.333	160	320	853		3.81456	1.93152	8.07868e-13
Tgif2	2	156840007	156855570	+		Tgif2	ENSMUSG00000062175	TGFB-induced factor homeobox 2 [Source:MGI Symbol;Acc:MGI:1915299]	224	363	246	207	343.333		0.61708	-0.696471	0.00995109
Gm37790	2	156846370	156849715	-		Tgif2	ENSMUSG00000062175	TGFB-induced factor homeobox 2 [Source:MGI Symbol;Acc:MGI:1915299]	5.33333	25.3333	5.33333	3.33333	10		0.210526	-2.24793	0.0382625
4930518I15Rik	2	156856616	156857946	-		5430405H02Rik	ENSMUSG00000085741	RIKEN cDNA 5430405H02 gene [Source:MGI Symbol;Acc:MGI:1921737]	61	22.3333	23.3333	16.6667	44.3333		2.73134	1.44961	0.0126975
D630003M21Rik	2	158182533	158229222	-		D630003M21Rik	ENSMUSG00000037813	RIKEN cDNA D630003M21 gene [Source:MGI Symbol;Acc:MGI:3606579]	32	0.666667	2	15	0		48	5.58496	0.00180141
Lbp	2	158306493	158332852	+		Lbp	ENSMUSG00000016024	lipopolysaccharide binding protein [Source:MGI Symbol;Acc:MGI:1098776]	1.66667	13.3333	27	68.6667	1		0.125	-3	0.0421883
Gm14221	2	160568379	160619971	-		Gm14221	ENSMUSG00000078956	predicted gene 14221 [Source:MGI Symbol;Acc:MGI:3650696]	230.667	61	38	16	133.667		3.78142	1.91893	3.86856e-06
Wisp2	2	163820861	163833146	+		Wisp2	ENSMUSG00000027656	WNT1 inducible signaling pathway protein 2 [Source:MGI Symbol;Acc:MGI:1328326]	0	34.3333	0.666667	1	0		0	#NUM!	2.20598e-05
Slpi	2	164354070	164389095	-		Slpi	ENSMUSG00000017002	secretory leukocyte peptidase inhibitor [Source:MGI Symbol;Acc:MGI:109297]	176.333	496	298	2110.33	253.667		0.355511	-1.49203	1.85495e-06
Wfdc13	2	164685107	164687706	+		Wfdc13	ENSMUSG00000067704	WAP four-disulfide core domain 13 [Source:MGI Symbol;Acc:MGI:3582777]	79.6667	0	17.3333	14.6667	4.66667		#DIV/0!	#DIV/0!	2.25823e-10
Mmp9	2	164940780	164955850	+		Mmp9	ENSMUSG00000017737	matrix metallopeptidase 9 [Source:MGI Symbol;Acc:MGI:97011]	58	246	291.333	7781.67	29.3333		0.235772	-2.08453	3.97599e-15
Slc12a5	2	164960802	164999731	+		Slc12a5	ENSMUSG00000017740	solute carrier family 12, member 5 [Source:MGI Symbol;Acc:MGI:1862037]	41	12.6667	8	13.3333	8.33333		3.23684	1.69459	0.034554
Cdh22	2	165111507	165234853	-		Cdh22	ENSMUSG00000053166	cadherin 22 [Source:MGI Symbol;Acc:MGI:1341843]	10	54	17.3333	41.6667	41.3333		0.185185	-2.43296	0.00282924
Slc35c2	2	165276554	165287869	-		Slc35c2	ENSMUSG00000017664	solute carrier family 35, member C2 [Source:MGI Symbol;Acc:MGI:2385166]	537	828.333	1715.33	1426.67	1731.67		0.64829	-0.625289	0.00435032
Elmo2	2	165288031	165326479	-		Elmo2	ENSMUSG00000017670	engulfment and cell motility 2 [Source:MGI Symbol;Acc:MGI:2153045]	895	1231.67	1647.67	1200.33	1692.33		0.726658	-0.460652	0.00431729
Ocstamp	2	165393760	165400405	-		Ocstamp	ENSMUSG00000027670	osteoclast stimulatory transmembrane protein [Source:MGI Symbol;Acc:MGI:1921864]	4.66667	81.3333	6.66667	8.33333	4.66667		0.057377	-4.12338	5.18892e-09
Eya2	2	165595032	165771727	+		Eya2	ENSMUSG00000017897	EYA transcriptional coactivator and phosphatase 2 [Source:MGI Symbol;Acc:MGI:109341]	18.6667	136	15.3333	23.3333	45		0.137255	-2.86507	2.16702e-08
Zmynd8	2	165784152	165899016	-		Zmynd8	ENSMUSG00000039671	zinc finger, MYND-type containing 8 [Source:MGI Symbol;Acc:MGI:1918025]	1543.67	1128.33	2607	2346.33	2610		1.36809	0.452168	0.00825466
5031425F14Rik	2	166447451	166459232	+		5031425F14Rik	ENSMUSG00000085129	RIKEN cDNA 5031425F14 gene [Source:MGI Symbol;Acc:MGI:2442533]	7	34.3333	12	20.6667	7.66667		0.203884	-2.29418	0.00659734
Ddx27	2	167015193	167034947	+		Ddx27	ENSMUSG00000017999	DEAD (Asp-Glu-Ala-Asp) box polypeptide 27 [Source:MGI Symbol;Acc:MGI:2385884]	688	907.333	1368.67	1101.33	1572.33		0.758266	-0.399224	0.0345784
Znfx1	2	167035793	167063015	-		Znfx1	ENSMUSG00000039501	zinc finger, NFX1-type containing 1 [Source:MGI Symbol;Acc:MGI:2138982]	2461	1243	3853.67	3991	4558.67		1.97989	0.985418	3.16701e-09
Ptgis	2	167191805	167240604	-		1110018N20Rik	ENSMUSG00000085151	RIKEN cDNA 1110018N20 gene [Source:MGI Symbol;Acc:MGI:1915753]	104.333	252	18	8	46		0.414021	-1.27222	0.00889242
Gm14321	2	167777467	167782569	+		Gm14321	ENSMUSG00000084797	predicted gene 14321 [Source:MGI Symbol;Acc:MGI:3701951]	54	16	34.3333	39	46		3.375	1.75489	0.00133206
9230111E07Rik	2	167782053	167783486	+		Gm14321	ENSMUSG00000084797	predicted gene 14321 [Source:MGI Symbol;Acc:MGI:3701951]	60.6667	26.6667	43.3333	41.6667	49.3333		2.275	1.18587	0.0141918
Ripor3	2	167980164	168010618	-		Ripor3	ENSMUSG00000074577	RIPOR family member 3 [Source:MGI Symbol;Acc:MGI:1916803]	3	45	12	14	18.3333		0.0666667	-3.90689	0.0020665
Zfp217	2	170108643	170148103	-		Zfp217	ENSMUSG00000052056	zinc finger protein 217 [Source:MGI Symbol;Acc:MGI:2685408]	2095.67	1281.67	3317.33	2801	4335		1.63511	0.709388	1.74575e-06
Bmp7	2	172868012	172940321	-		Bmp7	ENSMUSG00000008999	bone morphogenetic protein 7 [Source:MGI Symbol;Acc:MGI:103302]	7.66667	35.6667	41.6667	51.6667	21		0.214953	-2.21791	0.0199599
Spo11	2	172977700	172993576	+		Spo11	ENSMUSG00000005883	SPO11 meiotic protein covalently bound to DSB [Source:MGI Symbol;Acc:MGI:1349669]	190.333	65	39	46.3333	112.333		2.92821	1.55002	0.0223074
Rbm38	2	173020498	173034734	+		Rbm38	ENSMUSG00000027510	RNA binding motif protein 38 [Source:MGI Symbol;Acc:MGI:1889294]	540	791.333	2732.67	3085.67	3403.33		0.682393	-0.551326	0.00118964
Phactr3	2	178118975	178338492	+		Phactr3	ENSMUSG00000027525	phosphatase and actin regulator 3 [Source:MGI Symbol;Acc:MGI:1921439]	1.66667	282.667	29.3333	11	24.6667		0.00589623	-7.40599	1.09246e-14
Sycp2	2	178345293	178407685	-		Sycp2	ENSMUSG00000060445	synaptonemal complex protein 2 [Source:MGI Symbol;Acc:MGI:1933281]	0.333333	14.3333	0	9.33333	0.333333		0.0232558	-5.42626	0.00365238
Ptk6	2	181193721	181202789	-		Ptk6	ENSMUSG00000038751	PTK6 protein tyrosine kinase 6 [Source:MGI Symbol;Acc:MGI:99683]	515.667	13.6667	64.6667	142	594		37.7317	5.23771	1.81051e-23
Srms	2	181205562	181213185	-		Srms	ENSMUSG00000027579	src-related kinase lacking C-terminal regulatory tyrosine and N-terminal myristylation sites [Source:MGI Symbol;Acc:MGI:101865]	165.333	33	81	61.6667	177		5.0101	2.32484	0.00322565
Helz2	2	181227615	181242027	-		Helz2	ENSMUSG00000027580	helicase with zinc finger 2, transcriptional coactivator [Source:MGI Symbol;Acc:MGI:2385169]	4387	2559.33	14414.7	9851.67	12156		1.71412	0.777467	0.0111582
Zgpat	2	181364928	181383628	+		Arfrp1	ENSMUSG00000038671	ADP-ribosylation factor related protein 1 [Source:MGI Symbol;Acc:MGI:1923938]	1269.67	1650.33	2644.67	2417.67	2932.33		0.769339	-0.378308	0.0382593
Lime1	2	181380078	181383628	+		Zgpat	ENSMUSG00000027582	zinc finger, CCCH-type with G patch domain [Source:MGI Symbol;Acc:MGI:2449939]	608	841	1485.33	1380.67	1513		0.722949	-0.468034	0.0180143
Zbtb46	2	181387762	181459426	-		Zbtb46	ENSMUSG00000027583	zinc finger and BTB domain containing 46 [Source:MGI Symbol;Acc:MGI:1919397]	1691.33	912.333	956.667	1146.67	1460.67		1.85385	0.890528	0.000259641
Zfp512b	2	181582103	181592803	-		Uckl1	ENSMUSG00000089917	uridine-cytidine kinase 1-like 1 [Source:MGI Symbol;Acc:MGI:1915806]	476.667	666.667	672.333	503.333	940.333		0.715	-0.483985	0.030753
Zc2hc1a	3	7503483	7553836	+		Zc2hc1a	ENSMUSG00000043542	zinc finger, C2HC-type containing 1A [Source:MGI Symbol;Acc:MGI:1914556]	210.333	98.3333	192.333	139.667	170		2.13898	1.09692	0.0367775
Gm16685	3	7612705	7690001	+		Il7	ENSMUSG00000040329	interleukin 7 [Source:MGI Symbol;Acc:MGI:96561]	95.6667	4.33333	38	62.3333	66.6667		22.0769	4.46447	1.94258e-09
Zfp704	3	9427020	9610085	-		C030034L19Rik	ENSMUSG00000097365	RIKEN cDNA C030034L19 gene [Source:MGI Symbol;Acc:MGI:2444519]	219.667	84.6667	110	109.333	225		2.59449	1.37545	0.00944722
Fabp5	3	10012548	10016607	+		Fabp5	ENSMUSG00000027533	fatty acid binding protein 5, epidermal [Source:MGI Symbol;Acc:MGI:101790]	640.667	178	3215.67	6289.67	4697		3.59925	1.8477	2.23354e-22
Car13	3	14641727	14663002	+		Car13	ENSMUSG00000027555	carbonic anhydrase 13 [Source:MGI Symbol;Acc:MGI:1931322]	301	133	312.667	382.333	301.667		2.26316	1.17834	1.34732e-05
Car1	3	14766216	14808368	-		Car1	ENSMUSG00000027556	carbonic anhydrase 1 [Source:MGI Symbol;Acc:MGI:88268]	2.66667	433.333	1.33333	3.66667	0		0.00615385	-7.3443	3.8996e-09
Car2	3	14886273	14900770	+		Car2	ENSMUSG00000027562	carbonic anhydrase 2 [Source:MGI Symbol;Acc:MGI:88269]	407.667	1085.67	546	1012.33	522		0.375499	-1.41312	1.23026e-09
Gm9733	3	15296551	15332302	-		Gm9733	ENSMUSG00000078783	predicted gene 9733 [Source:MGI Symbol;Acc:MGI:3780136]	9.66667	141.333	5.33333	20.3333	10.3333		0.0683962	-3.86994	7.22679e-10
Sirpb1a	3	15371653	15426520	-		Sirpb1a	ENSMUSG00000095788	signal-regulatory protein beta 1A [Source:MGI Symbol;Acc:MGI:2444824]	79.6667	427.333	29.3333	30.6667	41		0.186427	-2.42331	4.0474e-12
Sirpb1b	3	15495751	15575065	-		Sirpb1b	ENSMUSG00000095028	signal-regulatory protein beta 1B [Source:MGI Symbol;Acc:MGI:3779828]	61	195	17	53.3333	35.3333		0.312821	-1.67659	3.09079e-06
Gm37468	3	15547479	15548599	+		Sirpb1b	ENSMUSG00000095028	signal-regulatory protein beta 1B [Source:MGI Symbol;Acc:MGI:3779828]	2.66667	17.3333	0.333333	2.66667	1.66667		0.153846	-2.70044	0.0186728
Hps3	3	19995945	20035315	-		Cp	ENSMUSG00000003617	ceruloplasmin [Source:MGI Symbol;Acc:MGI:88476]	1019.33	1453.67	1131	946.667	1833		0.701215	-0.512071	0.0025421
Gyg	3	20122084	20155317	-		Gyg	ENSMUSG00000019528	glycogenin [Source:MGI Symbol;Acc:MGI:1351614]	931.667	597.333	3923.33	2903	2969.67		1.55971	0.641278	0.0356986
Cpa3	3	20215620	20242181	-		Cpa3	ENSMUSG00000001865	carboxypeptidase A3, mast cell [Source:MGI Symbol;Acc:MGI:88479]	17.6667	67	4	38.6667	7.33333		0.263682	-1.92313	0.000393989
Nceh1	3	27182965	27284608	+		Nceh1	ENSMUSG00000027698	neutral cholesterol ester hydrolase 1 [Source:MGI Symbol;Acc:MGI:2443191]	1501	792.333	1493.67	1640	2833.33		1.8944	0.921745	0.000316192
Tnfsf10	3	27317028	27342427	+		Tnfsf10	ENSMUSG00000039304	tumor necrosis factor (ligand) superfamily, member 10 [Source:MGI Symbol;Acc:MGI:107414]	135	528.333	571.333	352	224		0.255521	-1.96849	2.91898e-09
Tnik	3	28263214	28675858	+		Tnik	ENSMUSG00000027692	TRAF2 and NCK interacting kinase [Source:MGI Symbol;Acc:MGI:1916264]	153	630.333	127	109.333	316		0.242729	-2.04258	6.03013e-08
Actrt3	3	30597073	30599939	-		Actrt3	ENSMUSG00000037737	actin related protein T3 [Source:MGI Symbol;Acc:MGI:1923902]	0.333333	7	3	1.66667	0		0.047619	-4.39232	0.0480987
Gpr160	3	30855950	30897192	+		Gpr160	ENSMUSG00000037661	G protein-coupled receptor 160 [Source:MGI Symbol;Acc:MGI:1919112]	90.3333	292.333	304.333	75	99		0.309008	-1.69428	0.00168091
Gnb4	3	32580332	32616585	-		Gnb4	ENSMUSG00000027669	guanine nucleotide binding protein (G protein), beta 4 [Source:MGI Symbol;Acc:MGI:104581]	1568.67	268.333	1032.67	1920.33	1893.33		5.84596	2.54744	5.2031e-29
Gm43080	3	35969384	35972026	-		Gm15952	ENSMUSG00000085655	predicted gene 15952 [Source:MGI Symbol;Acc:MGI:3802149]	27	5.66667	7.33333	4.33333	31.6667		4.76471	2.25239	0.0109641
Cetn4	3	37307749	37312708	-		Cetn4	ENSMUSG00000045031	centrin 4 [Source:MGI Symbol;Acc:MGI:2677454]	97	19.6667	53	38	96.6667		4.9322	2.30223	0.000882046
Bbs12	3	37312554	37321453	+		Cetn4	ENSMUSG00000045031	centrin 4 [Source:MGI Symbol;Acc:MGI:2677454]	272	108.667	166.333	123	208.333		2.50307	1.3237	0.000644777
Spata5	3	37419896	37579096	+		Nudt6	ENSMUSG00000050174	nudix (nucleoside diphosphate linked moiety X)-type motif 6 [Source:MGI Symbol;Acc:MGI:2387618]	396.333	636.667	498	390.333	548.667		0.622513	-0.683824	0.0218137
Larp1b	3	40950354	41040234	+		Larp1b	ENSMUSG00000025762	La ribonucleoprotein domain family, member 1B [Source:MGI Symbol;Acc:MGI:1914604]	246	443.333	317	259.667	319.333		0.554887	-0.849734	0.000395365
Gm6209	3	50516399	50607223	-		Gm6209	ENSMUSG00000102715	predicted gene 6209 [Source:MGI Symbol;Acc:MGI:3643374]	25	1.33333	4.66667	23.3333	5.66667		18.75	4.22882	0.00265085
Rab33b	3	51483920	51496232	+		Gm38160	ENSMUSG00000102775	predicted gene, 38160 [Source:MGI Symbol;Acc:MGI:5611388]	388	629.333	452	472	799		0.616525	-0.697768	3.47312e-05
Lhfp	3	53041528	53261679	+		Gm42901	ENSMUSG00000104850	predicted gene 42901 [Source:MGI Symbol;Acc:MGI:5663038]	0.666667	10.6667	6	14.6667	1		0.0625	-4	0.0427001
Postn	3	54361109	54391037	+		Postn	ENSMUSG00000027750	periostin, osteoblast specific factor [Source:MGI Symbol;Acc:MGI:1926321]	5	37.3333	0	0	0.666667		0.133929	-2.90046	0.000305727
Spg20	3	55112108	55137322	+		Spg20	ENSMUSG00000036580	spastic paraplegia 20, spartin (Troyer syndrome) homolog (human) [Source:MGI Symbol;Acc:MGI:2139806]	582	350.333	563.667	459.333	632.667		1.66127	0.732291	0.00065558
P2ry12	3	59216272	59262871	-		Med12l	ENSMUSG00000056476	mediator complex subunit 12-like [Source:MGI Symbol;Acc:MGI:2139916]	116.667	239.333	32.6667	29.3333	69.6667		0.487465	-1.03663	0.0123923
Sucnr1	3	60081869	60087566	+		Sucnr1	ENSMUSG00000027762	succinate receptor 1 [Source:MGI Symbol;Acc:MGI:1934135]	19.3333	63	6.33333	54.3333	20		0.306878	-1.70426	0.000526517
Mbnl1	3	60472830	60629750	+		Mbnl1	ENSMUSG00000027763	muscleblind like splicing factor 1 [Source:MGI Symbol;Acc:MGI:1928482]	2777.33	3971	10881.7	8439.33	12110.3		0.699404	-0.515802	0.00659843
Rap2b	3	61361638	61368430	+		Gm37696	ENSMUSG00000103473	predicted gene, 37696 [Source:MGI Symbol;Acc:MGI:5610924]	1645.33	807.333	1714.33	3678.33	4687		2.03799	1.02714	2.57394e-09
B430305J03Rik	3	61362250	61365951	-		Rap2b	ENSMUSG00000036894	RAP2B, member of RAS oncogene family [Source:MGI Symbol;Acc:MGI:1921262]	629.667	298.667	869.667	1654.67	2181.67		2.10826	1.07605	1.68292e-07
E130311K13Rik	3	63914684	63929472	-		E130311K13Rik	ENSMUSG00000048581	RIKEN cDNA E130311K13 gene [Source:MGI Symbol;Acc:MGI:3607716]	228	98	187.333	196.667	238.667		2.32653	1.21818	0.00328162
Slc33a1	3	63933507	63964768	-		Slc33a1	ENSMUSG00000027822	solute carrier family 33 (acetyl-CoA transporter), member 1 [Source:MGI Symbol;Acc:MGI:1332247]	748.667	449.667	1139.67	941.667	1324.33		1.66494	0.735468	0.000862759
Gm26850	3	63963633	63968659	+		Slc33a1	ENSMUSG00000027822	solute carrier family 33 (acetyl-CoA transporter), member 1 [Source:MGI Symbol;Acc:MGI:1332247]	188.667	110.667	307	224	327.667		1.70482	0.769619	0.0377889
Ccnl1	3	65946151	65958249	-		Ccnl1	ENSMUSG00000027829	cyclin L1 [Source:MGI Symbol;Acc:MGI:1922664]	1508.67	2182.67	2054	1999.33	3958.33		0.691203	-0.532818	0.0116852
Lxn	3	67457998	67463926	-		Gfm1	ENSMUSG00000027774	G elongation factor, mitochondrial 1 [Source:MGI Symbol;Acc:MGI:107339]	206.667	122.333	212.333	230	242.667		1.68937	0.756488	0.00985511
Rarres1	3	67478972	67515523	-		Rarres1	ENSMUSG00000049404	retinoic acid receptor responder (tazarotene induced) 1 [Source:MGI Symbol;Acc:MGI:1924461]	14.3333	1.66667	1	4	10		8.6	3.10434	0.0314945
1110032F04Rik	3	68869586	68872163	+		Gm17641	ENSMUSG00000091272	predicted gene, 17641 [Source:MGI Symbol;Acc:MGI:4937275]	318.667	106.667	166	297	382		2.9875	1.57894	0.00266113
Trim59	3	69035288	69044755	-		Trim59	ENSMUSG00000034317	tripartite motif-containing 59 [Source:MGI Symbol;Acc:MGI:1914199]	505.667	771	1280.33	980	1820.67		0.655858	-0.608544	0.000451933
Ppm1l	3	69316861	69560802	+		Ppm1l	ENSMUSG00000027784	protein phosphatase 1 (formerly 2C)-like [Source:MGI Symbol;Acc:MGI:2139740]	724.667	345.333	556.667	490	455		2.09846	1.06933	0.00120437
Nmd3	3	69721985	69756373	+		Nmd3	ENSMUSG00000027787	NMD3 ribosome export adaptor [Source:MGI Symbol;Acc:MGI:2140103]	502	749.667	930.333	743	987.667		0.669631	-0.578562	0.0218191
Pdgfc	3	81036416	81214040	+		Pdgfc	ENSMUSG00000028019	platelet-derived growth factor, C polypeptide [Source:MGI Symbol;Acc:MGI:1859631]	325.667	151	41	50.6667	371.667		2.15673	1.10885	0.000672171
Tmem131l	3	83897655	84040175	-		Tmem131l	ENSMUSG00000033767	transmembrane 131 like [Source:MGI Symbol;Acc:MGI:2443399]	2903.33	1892.33	5359.33	6878.67	7428.33		1.53426	0.617544	0.00142792
Trim2	3	84160439	84306877	-		Trim2	ENSMUSG00000027993	tripartite motif-containing 2 [Source:MGI Symbol;Acc:MGI:1933163]	105	48.3333	112.667	123	28.6667		2.17241	1.1193	0.00550428
Kirrel	3	87078593	87174747	-		Kirrel	ENSMUSG00000041734	kin of IRRE like (Drosophila) [Source:MGI Symbol;Acc:MGI:1891396]	22.3333	0.666667	6.33333	18.6667	10.3333		33.5	5.06609	0.0026998
Fcrl5	3	87435773	87500678	+		Fcrl5	ENSMUSG00000048031	Fc receptor-like 5 [Source:MGI Symbol;Acc:MGI:3053558]	883.333	481.667	2732	2297.67	751		1.83391	0.874923	0.00351623
Etv3	3	87525407	87540156	+		Etv3	ENSMUSG00000003382	ets variant 3 [Source:MGI Symbol;Acc:MGI:1350926]	4214.67	2458.67	5710.67	6886.67	12945		1.71421	0.777542	0.0166685
Gpatch4	3	88043108	88055993	+		Gpatch4	ENSMUSG00000028069	G patch domain containing 4 [Source:MGI Symbol;Acc:MGI:1913864]	252	354.667	434.667	360.667	452		0.710526	-0.49304	0.0318427
Sema4a	3	88435959	88461182	-		Sema4a	ENSMUSG00000028064	sema domain, immunoglobulin domain (Ig), transmembrane domain (TM) and short cytoplasmic domain, (semaphorin) 4A [Source:MGI Symbol;Acc:MGI:107560]	759.333	1046	3988.33	2451.33	1075.33		0.72594	-0.462078	0.0205149
Fdps	3	89093588	89101959	-		Gm43738	ENSMUSG00000105204	predicted gene 43738 [Source:MGI Symbol;Acc:MGI:5663875]	396.667	278.333	1011	1213.67	1164		1.42515	0.511113	0.0411352
Pklr	3	89136142	89146784	+		Pklr	ENSMUSG00000041237	pyruvate kinase liver and red blood cell [Source:MGI Symbol;Acc:MGI:97604]	1.66667	120	11	0.666667	2.33333		0.0138889	-6.16993	0.00196501
Fam189b	3	89183143	89189295	+		Fam189b	ENSMUSG00000032657	family with sequence similarity 189, member B [Source:MGI Symbol;Acc:MGI:1915771]	210.667	492.667	515.333	512	551.667		0.427605	-1.22565	0.00124844
Pbxip1	3	89436706	89450952	+		Pbxip1	ENSMUSG00000042613	pre B cell leukemia transcription factor interacting protein 1 [Source:MGI Symbol;Acc:MGI:2441670]	2157	1534	5888.33	5286	4914.67		1.40613	0.491728	0.0433055
Pmvk	3	89454541	89469013	+		Pmvk	ENSMUSG00000027952	phosphomevalonate kinase [Source:MGI Symbol;Acc:MGI:1915853]	470	247.333	1462.67	1841.67	1180.67		1.90027	0.926204	3.40393e-06
4632404H12Rik	3	89767511	89773240	-		4632404H12Rik	ENSMUSG00000042579	RIKEN cDNA 4632404H12 gene [Source:MGI Symbol;Acc:MGI:1921284]	293.667	171	142.333	126.333	350.333		1.71735	0.780183	0.0388583
Il6ra	3	89864059	89913196	-		Il6ra	ENSMUSG00000027947	interleukin 6 receptor, alpha [Source:MGI Symbol;Acc:MGI:105304]	1165.67	1830.67	1464	1089	2123.67		0.636744	-0.651214	0.00302866
Atp8b2	3	89939481	89963508	-		Atp8b2	ENSMUSG00000060671	ATPase, class I, type 8B, member 2 [Source:MGI Symbol;Acc:MGI:1859660]	903.667	1679.33	2219.67	1272.33	1925.67		0.53811	-0.894026	7.01967e-07
Nup210l	3	90104132	90212048	+		Nup210l	ENSMUSG00000027939	nucleoporin 210-like [Source:MGI Symbol;Acc:MGI:1924845]	101.667	45	32	28.6667	58.6667		2.25926	1.17585	0.0298306
Rab13	3	90213695	90226385	+		Rab13	ENSMUSG00000027935	RAB13, member RAS oncogene family [Source:MGI Symbol;Acc:MGI:1927232]	87.6667	20	333	115.333	47		4.38333	2.13203	1.80174e-06
Slc27a3	3	90385239	90389938	-		Slc27a3	ENSMUSG00000027932	solute carrier family 27 (fatty acid transporter), member 3 [Source:MGI Symbol;Acc:MGI:1347358]	207.667	27.3333	381.667	1182.33	246.667		7.59756	2.92554	1.34473e-15
Npr1	3	90450591	90465866	-		Npr1	ENSMUSG00000027931	natriuretic peptide receptor 1 [Source:MGI Symbol;Acc:MGI:97371]	380.667	3.66667	670	961.333	266.333		103.818	6.69792	6.73318e-39
Gm16048	3	90451583	90457095	+		Npr1	ENSMUSG00000027931	natriuretic peptide receptor 1 [Source:MGI Symbol;Acc:MGI:97371]	45	0.666667	98.6667	142.333	43.3333		67.5	6.07682	3.22217e-06
S100a8	3	90668978	90670035	+		S100a8	ENSMUSG00000056054	S100 calcium binding protein A8 (calgranulin A) [Source:MGI Symbol;Acc:MGI:88244]	113	326	26080	68508	105.333		0.346626	-1.52855	1.13651e-05
S100a9	3	90692632	90695721	-		S100a9	ENSMUSG00000056071	S100 calcium binding protein A9 (calgranulin B) [Source:MGI Symbol;Acc:MGI:1338947]	177	480	39771	101937	143		0.36875	-1.43929	3.95051e-05
Sprr1a	3	92483952	92485895	-		Sprr1a	ENSMUSG00000050359	small proline-rich protein 1A [Source:MGI Symbol;Acc:MGI:106660]	16.6667	0	0	0	0.333333		#DIV/0!	#DIV/0!	0.0210145
Snx27	3	94497544	94582716	-		Snx27	ENSMUSG00000028136	sorting nexin family member 27 [Source:MGI Symbol;Acc:MGI:1923992]	1485.33	1006	1496	1576.33	2291.33		1.47647	0.562156	0.000236588
Adamtsl4	3	95676201	95687917	-		Adamtsl4	ENSMUSG00000015850	ADAMTS-like 4 [Source:MGI Symbol;Acc:MGI:2389008]	161.333	34	106	151.333	262.333		4.7451	2.24644	0.000965432
Ecm1	3	95734147	95739569	-		Ecm1	ENSMUSG00000028108	extracellular matrix protein 1 [Source:MGI Symbol;Acc:MGI:103060]	169.333	84.3333	103.333	217.333	212		2.00791	1.00569	0.00611987
Ciart	3	95878503	95882251	-		C920021L13Rik	ENSMUSG00000080727	RIKEN cDNA C920021L13 gene [Source:MGI Symbol;Acc:MGI:1923991]	38.3333	236.333	45.6667	48.6667	63		0.1622	-2.62415	1.00726e-18
Mtmr11	3	96162004	96171718	+		Mtmr11	ENSMUSG00000045934	myotubularin related protein 11 [Source:MGI Symbol;Acc:MGI:2652817]	64	32.6667	127.667	53.3333	56.6667		1.95918	0.970253	0.0490521
Gm17690	3	96167464	96172416	-		Mtmr11	ENSMUSG00000045934	myotubularin related protein 11 [Source:MGI Symbol;Acc:MGI:2652817]	78.6667	42.6667	96	68	77		1.84375	0.882643	0.0397423
Sv2a	3	96181151	96195521	+		Sv2a	ENSMUSG00000038486	synaptic vesicle glycoprotein 2 a [Source:MGI Symbol;Acc:MGI:1927139]	113.333	38.6667	65.3333	71.6667	108		2.93103	1.55141	0.00281089
Lix1l	3	96601149	96626171	+		Lix1l	ENSMUSG00000049288	Lix1-like [Source:MGI Symbol;Acc:MGI:3036267]	204.667	53.6667	125.333	123	174.667		3.81366	1.93118	9.40733e-05
Ankrd35	3	96670131	96691032	+		Ankrd35	ENSMUSG00000038354	ankyrin repeat domain 35 [Source:MGI Symbol;Acc:MGI:2442590]	89.3333	22.3333	13.6667	45.6667	182		4	2	0.0489755
Nudt17	3	96706067	96708562	-		Pias3	ENSMUSG00000028101	protein inhibitor of activated STAT 3 [Source:MGI Symbol;Acc:MGI:1913126]	348	86.6667	1507.67	608.667	1079.33		4.01538	2.00554	7.75796e-07
Polr3c	3	96711490	96727628	-		Polr3c	ENSMUSG00000028099	polymerase (RNA) III (DNA directed) polypeptide C [Source:MGI Symbol;Acc:MGI:1921664]	927.667	701.333	2304.33	2178.67	2147		1.32272	0.403506	0.0409787
Cd160	3	96798763	96829351	-		Cd160	ENSMUSG00000038304	CD160 antigen [Source:MGI Symbol;Acc:MGI:1860383]	18.6667	410	38	32.6667	49.6667		0.0455285	-4.45709	3.43863e-19
Bcl9	3	97203662	97297917	-		Bcl9	ENSMUSG00000038256	B cell CLL/lymphoma 9 [Source:MGI Symbol;Acc:MGI:1924828]	1059.33	494.333	1931.67	1295.67	1213.67		2.14295	1.0996	1.7166e-08
Notch2	3	98013527	98150361	+		Notch2	ENSMUSG00000027878	notch 2 [Source:MGI Symbol;Acc:MGI:97364]	3277.67	2302	7529	7075.67	9102.33		1.42383	0.509781	0.0129595
Gm42820	3	98121588	98124650	+		Notch2	ENSMUSG00000027878	notch 2 [Source:MGI Symbol;Acc:MGI:97364]	165	94.3333	237.333	222.667	364.667		1.74912	0.806626	0.0106141
Phgdh	3	98313170	98339990	-		Phgdh	ENSMUSG00000053398	3-phosphoglycerate dehydrogenase [Source:MGI Symbol;Acc:MGI:1355330]	221.333	328.667	1350	802.667	923.667		0.673428	-0.570404	0.0232408
Fam46c	3	100451628	100489324	-		Fam46c	ENSMUSG00000044468	family with sequence similarity 46, member C [Source:MGI Symbol;Acc:MGI:1921895]	988.667	2034.33	2650.33	1732.33	1359.33		0.48599	-1.041	0.00525856
Ptgfrn	3	101040232	101110278	-		Ptgfrn	ENSMUSG00000027864	prostaglandin F2 receptor negative regulator [Source:MGI Symbol;Acc:MGI:1277114]	223.333	40.6667	50	79.3333	88.6667		5.4918	2.45728	5.75017e-13
Cd2	3	101275899	101287939	-		Cd2	ENSMUSG00000027863	CD2 antigen [Source:MGI Symbol;Acc:MGI:88320]	502.333	1081.67	2028.33	2179	1992.67		0.464407	-1.10654	0.000114096
Igsf3	3	101377083	101463059	+		Igsf3	ENSMUSG00000042035	immunoglobulin superfamily, member 3 [Source:MGI Symbol;Acc:MGI:1926158]	629.333	94.3333	85.6667	224	540		6.67138	2.73798	1.20133e-05
Ampd1	3	103074014	103099720	+		Ampd1	ENSMUSG00000070385	adenosine monophosphate deaminase 1 [Source:MGI Symbol;Acc:MGI:88015]	1.66667	31.3333	4	0.333333	3		0.0531915	-4.23266	0.00485906
Dennd2c	3	103102604	103169769	+		Dennd2c	ENSMUSG00000007379	DENN/MADD domain containing 2C [Source:MGI Symbol;Acc:MGI:3036254]	42	106	13	21.6667	19.3333		0.396226	-1.3356	0.0038719
Olfml3	3	103722222	103738001	-		Olfml3	ENSMUSG00000027848	olfactomedin-like 3 [Source:MGI Symbol;Acc:MGI:1914877]	48.3333	14.6667	52.3333	66.6667	25		3.29545	1.72048	0.00575745
Bcl2l15	3	103832601	103854618	+		Gm43064	ENSMUSG00000105053	predicted gene 43064 [Source:MGI Symbol;Acc:MGI:5663201]	9.33333	41	44.6667	28.6667	9		0.227642	-2.13516	0.0319911
Ptpn22	3	103859795	103912247	+		Ptpn22	ENSMUSG00000027843	protein tyrosine phosphatase, non-receptor type 22 (lymphoid) [Source:MGI Symbol;Acc:MGI:107170]	1095	1632	5126	4171.67	2063		0.670956	-0.57571	0.0291863
Gm15472	3	103863166	103864423	+		Ptpn22	ENSMUSG00000027843	protein tyrosine phosphatase, non-receptor type 22 (lymphoid) [Source:MGI Symbol;Acc:MGI:107170]	4	23.6667	4	5.33333	3.33333		0.169014	-2.56478	0.019506
Slc16a1	3	104638668	104658462	+		Slc16a1	ENSMUSG00000032902	solute carrier family 16 (monocarboxylic acid transporters), member 1 [Source:MGI Symbol;Acc:MGI:106013]	309.333	614.333	413	208.333	421.333		0.503527	-0.989859	0.00123655
Fam19a3	3	104767406	104781840	-		Gm43584	ENSMUSG00000105195	predicted gene 43584 [Source:MGI Symbol;Acc:MGI:5663721]	4	37.3333	1.33333	3.33333	9		0.107143	-3.22239	7.13317e-05
Ppm1j	3	104781056	104786018	+		Fam19a3	ENSMUSG00000055865	family with sequence similarity 19, member A3 [Source:MGI Symbol;Acc:MGI:3046463]	24	188.667	34.6667	34.3333	65.3333		0.127208	-2.97473	3.51962e-08
Rhoc	3	104788375	104794459	+		Rhoc	ENSMUSG00000002233	ras homolog family member C [Source:MGI Symbol;Acc:MGI:106028]	294.333	127.667	261.667	392	556		2.30548	1.20507	0.000240479
Gm40117	3	104994032	105004005	+		Gm40117	ENSMUSG00000105355	predicted gene, 40117 [Source:MGI Symbol;Acc:MGI:5623002]	63.6667	29.6667	74.6667	72	78		2.14607	1.1017	0.0425233
Cttnbp2nl	3	105001915	105053146	-		Gm40117	ENSMUSG00000105355	predicted gene, 40117 [Source:MGI Symbol;Acc:MGI:5623002]	1457	534.333	1286.33	1071	1435		2.72676	1.44719	0.00121196
Rap1a	3	105727267	105801336	-		Rap1a	ENSMUSG00000068798	RAS-related protein-1a [Source:MGI Symbol;Acc:MGI:97852]	557.333	860.333	2102	2175.67	2100.67		0.647811	-0.626355	0.0109485
Gm5547	3	105815540	105817357	+		Gm5547	ENSMUSG00000104835	predicted gene 5547 [Source:MGI Symbol;Acc:MGI:3648206]	66.6667	243	93	135.333	137.667		0.274348	-1.86592	2.19259e-09
Adora3	3	105870858	105908926	+		Adora3	ENSMUSG00000000562	adenosine A3 receptor [Source:MGI Symbol;Acc:MGI:104847]	5	45.6667	8	14	10		0.109489	-3.19114	1.97375e-05
I830077J02Rik	3	105924358	105932664	-		I830077J02Rik	ENSMUSG00000074342	RIKEN cDNA I830077J02 gene [Source:MGI Symbol;Acc:MGI:3588284]	554.667	1028.67	487.333	832.333	826		0.539209	-0.891082	0.00549466
Gm42722	3	106001561	106017539	+		Pifo	ENSMUSG00000010136	primary cilia formation [Source:MGI Symbol;Acc:MGI:1923670]	6.66667	34.6667	7	7	16.6667		0.192308	-2.37851	0.00779722
Chil5	3	106016919	106032814	-		Gm42722	ENSMUSG00000106093	predicted gene 42722 [Source:MGI Symbol;Acc:MGI:5662859]	18.3333	98.3333	31.6667	28.6667	30.6667		0.186441	-2.42321	5.33747e-07
Chil3	3	106147554	106167564	-		Chil3	ENSMUSG00000040809	chitinase-like 3 [Source:MGI Symbol;Acc:MGI:1330860]	51	309.667	1686.67	5557	16.6667		0.164693	-2.60215	8.82785e-23
Cym	3	107211293	107221732	-		Cym	ENSMUSG00000046213	chymosin [Source:MGI Symbol;Acc:MGI:2684977]	0	59.3333	0.333333	0	0.333333		0	#NUM!	1.25038e-08
Sort1	3	108284082	108361511	+		Gm12523	ENSMUSG00000084863	predicted gene 12523 [Source:MGI Symbol;Acc:MGI:3649602]	2047	1119.33	1302	1699.33	2037		1.82877	0.870871	0.00853949
Mybphl	3	108364911	108380057	+		Mybphl	ENSMUSG00000068745	myosin binding protein H-like [Source:MGI Symbol;Acc:MGI:1916003]	0	9.66667	1.66667	2	1.33333		0	#NUM!	0.021488
Stxbp3	3	108793176	108840526	-		Stxbp3	ENSMUSG00000027882	syntaxin binding protein 3 [Source:MGI Symbol;Acc:MGI:107362]	1006	710.333	1694.67	1667	2083.67		1.41624	0.502062	0.0395192
Fndc7	3	108853678	108890008	-		Fndc7	ENSMUSG00000045326	fibronectin type III domain containing 7 [Source:MGI Symbol;Acc:MGI:2443535]	36.6667	183	18	23.6667	34.3333		0.200364	-2.3193	0.000243807
Vav3	3	109340653	109685698	+		Vav3	ENSMUSG00000033721	vav 3 oncogene [Source:MGI Symbol;Acc:MGI:1888518]	1172.67	726	931.667	871	1130.67		1.61524	0.691751	0.0105096
Mfsd14a	3	116631164	116662677	-		Mfsd14a	ENSMUSG00000089911	major facilitator superfamily domain containing 14A [Source:MGI Symbol;Acc:MGI:1201609]	912.333	1231	1901.67	1465.67	1794.33		0.741132	-0.432198	0.0237485
Agl	3	116739999	116808166	-		Agl	ENSMUSG00000033400	amylo-1,6-glucosidase, 4-alpha- glucanotransferase [Source:MGI Symbol;Acc:MGI:1924809]	601.333	364.333	453	1104.33	563		1.6505	0.722906	0.0164488
Frrs1	3	116859464	116908177	+		Frrs1	ENSMUSG00000033386	ferric-chelate reductase 1 [Source:MGI Symbol;Acc:MGI:108076]	650	402.333	369.333	568.333	548.333		1.61558	0.692048	0.00541336
Plppr4	3	117319139	117360876	-		Plppr4	ENSMUSG00000044667	phospholipid phosphatase related 4 [Source:MGI Symbol;Acc:MGI:106530]	49	1	44.6667	29.6667	17.6667		49	5.61471	1.49616e-07
Tmem56	3	121201761	121283098	-		Tmem56	ENSMUSG00000028132	transmembrane protein 56 [Source:MGI Symbol;Acc:MGI:1923195]	3.66667	66.3333	12.6667	0.666667	0.666667		0.0552764	-4.17719	0.00155718
Abcd3	3	121758774	121815302	-		Abcd3	ENSMUSG00000028127	ATP-binding cassette, sub-family D (ALD), member 3 [Source:MGI Symbol;Acc:MGI:1349216]	653	379	669.667	487.333	658.333		1.72296	0.784885	0.00051328
Fnbp1l	3	122538719	122619715	-		Fnbp1l	ENSMUSG00000039735	formin binding protein 1-like [Source:MGI Symbol;Acc:MGI:1925642]	723	107.333	355.333	915.667	466.667		6.73602	2.7519	5.74697e-19
Synpo2	3	123076519	123236149	-		Synpo2	ENSMUSG00000050315	synaptopodin 2 [Source:MGI Symbol;Acc:MGI:2153070]	1936	83.3333	377	1369.33	1231		23.232	4.53804	3.33083e-25
Gm43011	3	126600029	126604461	+		Camk2d	ENSMUSG00000053819	calcium/calmodulin-dependent protein kinase II, delta [Source:MGI Symbol;Acc:MGI:1341265]	4.66667	46.6667	5	4.33333	6		0.1	-3.32193	3.86323e-06
Alpk1	3	127670310	127780527	-		Alpk1	ENSMUSG00000028028	alpha-kinase 1 [Source:MGI Symbol;Acc:MGI:1918731]	554.667	305.667	193	209.333	328.667		1.81461	0.859662	0.0134673
Enpep	3	129269175	129332720	-		Enpep	ENSMUSG00000028024	glutamyl aminopeptidase [Source:MGI Symbol;Acc:MGI:106645]	21.3333	0	0	0	1.33333		#DIV/0!	#DIV/0!	2.29549e-05
Egf	3	129677565	129755316	-		Egf	ENSMUSG00000028017	epidermal growth factor [Source:MGI Symbol;Acc:MGI:95290]	666	38	90.3333	54	232		17.5263	4.13145	1.43627e-18
Gm42697	3	129728845	129740188	+		Egf	ENSMUSG00000028017	epidermal growth factor [Source:MGI Symbol;Acc:MGI:95290]	29.6667	0	2.66667	0	8.33333		#DIV/0!	#DIV/0!	9.84085e-05
Lef1	3	131110471	131224356	+		Gm43352	ENSMUSG00000106086	predicted gene 43352 [Source:MGI Symbol;Acc:MGI:5663489]	308.667	731.333	501.333	490.333	1121		0.42206	-1.24448	0.00023352
Dkk2	3	132085292	132180304	+		Dkk2	ENSMUSG00000028031	dickkopf WNT signaling pathway inhibitor 2 [Source:MGI Symbol;Acc:MGI:1890663]	202.667	27.3333	10	16.6667	258.667		7.41463	2.89038	0.0139936
Tbck	3	132684144	132841688	+		Aimp1	ENSMUSG00000028029	aminoacyl tRNA synthetase complex- interacting multifunctional protein 1 [Source:MGI Symbol;Acc:MGI:102774]	628.333	408	604.333	552.333	698.333		1.54003	0.622961	0.0490521
Npnt	3	132881745	132950291	-		Npnt	ENSMUSG00000040998	nephronectin [Source:MGI Symbol;Acc:MGI:2148811]	44.3333	13.6667	23.3333	14	10.3333		3.2439	1.69773	0.0125873
Ube2d3	3	135438149	135468198	+		4930539J05Rik	ENSMUSG00000097032	RIKEN cDNA 4930539J05 gene [Source:MGI Symbol;Acc:MGI:1922477]	1510.33	2042.67	6432.33	6131.33	6187.33		0.739393	-0.435587	0.0436542
Slc39a8	3	135825279	135888572	+		Slc39a8	ENSMUSG00000053897	solute carrier family 39 (metal ion transporter), member 8 [Source:MGI Symbol;Acc:MGI:1914797]	73.3333	182.667	42.3333	22	60		0.40146	-1.31667	0.00069595
Dnajb14	3	137867675	137916557	+		Dnajb14	ENSMUSG00000074212	DnaJ heat shock protein family (Hsp40) member B14 [Source:MGI Symbol;Acc:MGI:1917854]	1128	589.333	764.333	706.667	1205.67		1.91403	0.936611	0.000781457
Mttp	3	138089854	138144968	-		Mttp	ENSMUSG00000028158	microsomal triglyceride transfer protein [Source:MGI Symbol;Acc:MGI:106926]	88.3333	44.3333	198.333	68.6667	59.3333		1.99248	0.994566	0.0268247
Adh4	3	138415466	138430892	+		Adh4	ENSMUSG00000037797	alcohol dehydrogenase 4 (class II), pi polypeptide [Source:MGI Symbol;Acc:MGI:1349472]	60.6667	0	22	3	2.33333		#DIV/0!	#DIV/0!	1.19727e-07
Tspan5	3	138742195	138907905	+		Tspan5	ENSMUSG00000028152	tetraspanin 5 [Source:MGI Symbol;Acc:MGI:1928096]	205.333	342.333	283.333	268.667	254.667		0.599805	-0.737434	0.000287418
Gbp5	3	142493978	142522344	+		Gbp5	ENSMUSG00000105504	guanylate binding protein 5 [Source:MGI Symbol;Acc:MGI:2429943]	1433	592.667	2961.67	2993.33	2296.33		2.41789	1.27375	2.40111e-17
Gbp2b	3	142594847	142619179	+		Gbp2b	ENSMUSG00000040264	guanylate binding protein 2b [Source:MGI Symbol;Acc:MGI:95666]	163.333	11.6667	71	59.3333	27.3333		14	3.80735	0.0290967
Gbp2	3	142620602	142638008	+		Gbp2	ENSMUSG00000028270	guanylate binding protein 2 [Source:MGI Symbol;Acc:MGI:102772]	1787	854.333	5829.33	6355	4270.67		2.09169	1.06467	0.00013382
Lmo4	3	144188530	144205220	-		Lmo4	ENSMUSG00000028266	LIM domain only 4 [Source:MGI Symbol;Acc:MGI:109360]	442.333	618.333	2802	1176.67	1354.33		0.715364	-0.483251	0.0298306
Clca3a1	3	144729677	144760977	-		Clca3a1	ENSMUSG00000056025	chloride channel accessory 3A1 [Source:MGI Symbol;Acc:MGI:1316732]	0.333333	35.6667	14.6667	41	0.333333		0.00934579	-6.74147	0.000766452
Lpar3	3	146220963	146286186	+		Lpar3	ENSMUSG00000036832	lysophosphatidic acid receptor 3 [Source:MGI Symbol;Acc:MGI:1929469]	200.333	48.6667	143	190	185.667		4.11644	2.0414	6.8133e-08
Gm16325	3	146641932	146651715	+		Gm16325	ENSMUSG00000085810	predicted gene 16325 [Source:MGI Symbol;Acc:MGI:3826549]	41.3333	2.33333	1.33333	1	0.333333		17.7143	4.14684	0.00144982
Adgrl2	3	148815583	148990555	-		Adgrl2	ENSMUSG00000028184	adhesion G protein-coupled receptor L2 [Source:MGI Symbol;Acc:MGI:2139714]	680	220.667	1140	1045.33	161		3.08157	1.62367	0.00762269
Gm30382	3	149284418	149445301	-		Gm30382	ENSMUSG00000106515	predicted gene, 30382 [Source:MGI Symbol;Acc:MGI:5589541]	43.6667	2.33333	64.6667	93.3333	2		18.7143	4.22607	4.66693e-06
Adgrl4	3	151437887	151545086	+		Adgrl4	ENSMUSG00000039167	adhesion G protein-coupled receptor L4 [Source:MGI Symbol;Acc:MGI:2655562]	5.33333	92	13.3333	58.3333	13		0.057971	-4.10852	0.000174416
Dnajb4	3	152178511	152210302	-		Dnajb4	ENSMUSG00000028035	DnaJ heat shock protein family (Hsp40) member B4 [Source:MGI Symbol;Acc:MGI:1914285]	354.333	612.667	397.333	353.667	325.333		0.578346	-0.789995	0.00846781
St6galnac3	3	153198266	153725174	-		St6galnac3	ENSMUSG00000052544	ST6 (alpha-N-acetyl-neuraminyl-2,3-beta- galactosyl-1,3)-N-acetylgalactosaminide alpha-2,6- sialyltransferase 3 [Source:MGI Symbol;Acc:MGI:1341828]	190.667	65.3333	166.333	162	117		2.91837	1.54516	2.20598e-05
Acadm	3	153922357	153944632	-		Acadm	ENSMUSG00000062908	acyl-Coenzyme A dehydrogenase, medium chain [Source:MGI Symbol;Acc:MGI:87867]	933.333	644.667	1146	1613	1519.33		1.44778	0.533839	0.0119596
Slc44a5	3	153973436	154271722	+		Slc44a5	ENSMUSG00000028360	solute carrier family 44, member 5 [Source:MGI Symbol;Acc:MGI:3035141]	364	47.3333	389.667	140.667	85		7.69014	2.94301	2.33171e-05
Ptger3	3	157566892	157645888	+		Ptger3	ENSMUSG00000040016	prostaglandin E receptor 3 (subtype EP3) [Source:MGI Symbol;Acc:MGI:97795]	6.33333	93	4.66667	13.3333	8.66667		0.0681004	-3.87619	2.77295e-08
AI838599	4	3242055	3258092	+		AI838599	ENSMUSG00000085180	expressed sequence AI838599 [Source:MGI Symbol;Acc:MGI:3510989]	8	0	7.66667	9.66667	2		#DIV/0!	#DIV/0!	0.0206856
Nsmaf	4	6396207	6454271	-		Sdcbp	ENSMUSG00000028249	syndecan binding protein [Source:MGI Symbol;Acc:MGI:1337026]	1142	1479.67	2792.67	1996.67	2301.67		0.771795	-0.373709	0.025065
Tox	4	6686353	6991557	-		Tox	ENSMUSG00000041272	thymocyte selection-associated high mobility group box [Source:MGI Symbol;Acc:MGI:2181659]	63.6667	252.333	169.667	122	110.333		0.252312	-1.98672	3.65584e-09
Gm11802	4	6688169	6704160	+		Tox	ENSMUSG00000041272	thymocyte selection-associated high mobility group box [Source:MGI Symbol;Acc:MGI:2181659]	5	26.3333	13.6667	9.66667	11		0.189873	-2.39689	0.00526559
Asph	4	9448069	9669344	-		Clvs1	ENSMUSG00000041216	clavesin 1 [Source:MGI Symbol;Acc:MGI:1921688]	907.333	494	507	422.333	1006		1.83671	0.877122	0.000198024
Ccne2	4	11191351	11204779	+		Ccne2	ENSMUSG00000028212	cyclin E2 [Source:MGI Symbol;Acc:MGI:1329034]	178.333	363	208.333	187.333	199.333		0.491276	-1.02539	0.00381861
Gem	4	11704457	11714752	+		Gem	ENSMUSG00000028214	GTP binding protein (gene overexpressed in skeletal muscle) [Source:MGI Symbol;Acc:MGI:99844]	476.667	710	544	577.333	362.667		0.671361	-0.574838	0.00318406
Cdh17	4	11758147	11817895	+		Cdh17	ENSMUSG00000028217	cadherin 17 [Source:MGI Symbol;Acc:MGI:1095414]	1097	258	1016	921.667	257		4.25194	2.08812	2.5649e-12
Gm11837	4	14929908	14953030	+		Gm11837	ENSMUSG00000086587	predicted gene 11837 [Source:MGI Symbol;Acc:MGI:3702175]	1.33333	23.6667	1	0.666667	0		0.056338	-4.14975	0.0453907
Wwp1	4	19608303	19708993	-		Gm12353	ENSMUSG00000078772	predicted gene 12353 [Source:MGI Symbol;Acc:MGI:3699710]	1068.33	738.667	491.333	424	1417.33		1.4463	0.532367	0.00844694
Atp6v0d2	4	19876841	19922605	-		Atp6v0d2	ENSMUSG00000028238	ATPase, H+ transporting, lysosomal V0 subunit D2 [Source:MGI Symbol;Acc:MGI:1924415]	100.333	12	168	218	514.667		8.36111	3.06369	1.49818e-05
Coq3	4	21879673	21912162	+		Coq3	ENSMUSG00000028247	coenzyme Q3 methyltransferase [Source:MGI Symbol;Acc:MGI:101813]	213	117.333	195.667	163.333	193.333		1.81534	0.86024	0.0382711
Ndufaf4	4	24898083	24905001	+		Ndufaf4	ENSMUSG00000028261	NADH dehydrogenase (ubiquinone) 1 alpha subcomplex, assembly factor 4 [Source:MGI Symbol;Acc:MGI:1915743]	257	387	281.333	239	345.667		0.664083	-0.590565	0.011289
Bach2	4	32238804	32586108	+		Bach2	ENSMUSG00000040270	BTB and CNC homology, basic leucine zipper transcription factor 2 [Source:MGI Symbol;Acc:MGI:894679]	1637.67	1101.67	2377	2037.33	5112.67		1.48654	0.571954	0.00139367
Bach2os	4	32559680	32571708	-		Bach2	ENSMUSG00000040270	BTB and CNC homology, basic leucine zipper transcription factor 2 [Source:MGI Symbol;Acc:MGI:894679]	164.333	97.3333	163.667	135.333	349.333		1.68836	0.755619	0.0125194
Gabrr2	4	33062999	33095865	+		Gabrr2	ENSMUSG00000023267	gamma-aminobutyric acid (GABA) C receptor, subunit rho 2 [Source:MGI Symbol;Acc:MGI:95626]	7	29	7	8.66667	9.66667		0.241379	-2.05063	0.0244451
Srsf12	4	33208991	33233340	+		Srsf12	ENSMUSG00000054679	serine/arginine-rich splicing factor 12 [Source:MGI Symbol;Acc:MGI:2661424]	0	10	0	0.666667	2.66667		0	#NUM!	0.0182745
Pnrc1	4	33245423	33290163	-		Pnrc1	ENSMUSG00000040128	proline-rich nuclear receptor coactivator 1 [Source:MGI Symbol;Acc:MGI:1917838]	719.333	1173	2925.33	3163.33	2884.67		0.613242	-0.705471	0.00886929
3110043O21Rik	4	35191285	35226175	-		3110043O21Rik	ENSMUSG00000028300	RIKEN cDNA 3110043O21 gene [Source:MGI Symbol;Acc:MGI:1920455]	1059	638.667	1081.67	1072	1283.33		1.65814	0.729567	0.0391834
Aco1	4	40143081	40198338	+		Aco1	ENSMUSG00000028405	aconitase 1 [Source:MGI Symbol;Acc:MGI:87879]	922.667	625	921	864.667	1438		1.47627	0.561953	0.00106529
Dnaja1	4	40722150	40737149	+		Gm6297	ENSMUSG00000097123	predicted gene 6297 [Source:MGI Symbol;Acc:MGI:3779584]	580.667	973	1382	1038.33	1512		0.59678	-0.74473	1.02216e-05
Phf24	4	42916660	42944752	+		Phf24	ENSMUSG00000036062	PHD finger protein 24 [Source:MGI Symbol;Acc:MGI:2140712]	101.333	13	19.3333	52.3333	84.6667		7.79487	2.96253	7.40009e-08
Rusc2	4	43381979	43427088	+		Rusc2	ENSMUSG00000035969	RUN and SH3 domain containing 2 [Source:MGI Symbol;Acc:MGI:2140371]	253.333	47.3333	113	188.667	361.333		5.35211	2.42011	9.1473e-12
Sit1	4	43482081	43483734	-		Sit1	ENSMUSG00000028460	suppression inducing transmembrane adaptor 1 [Source:MGI Symbol;Acc:MGI:1889342]	75.3333	171	124.667	124.667	132.667		0.440546	-1.18264	0.00983848
Creb3	4	43562332	43567060	+		Tln1	ENSMUSG00000028465	talin 1 [Source:MGI Symbol;Acc:MGI:1099832]	420	600.667	804.667	871	977.333		0.699223	-0.516175	0.0180275
Gba2	4	43566928	43578873	-		Creb3	ENSMUSG00000028466	cAMP responsive element binding protein 3 [Source:MGI Symbol;Acc:MGI:99946]	575.333	796.667	756.333	729.333	1134.67		0.722176	-0.469578	0.0202179
Tmem8b	4	43668971	43692668	+		Fam221b	ENSMUSG00000043633	family with sequence similarity 221, member B [Source:MGI Symbol;Acc:MGI:2441678]	98.6667	43	77.6667	86.6667	111		2.29457	1.19823	0.010107
Glipr2	4	43957401	43979118	+		Glipr2	ENSMUSG00000028480	GLI pathogenesis-related 2 [Source:MGI Symbol;Acc:MGI:1917770]	1143.67	763	9610.67	6143.33	3057		1.49891	0.583912	0.0338697
Gm12678	4	44943753	44948330	+		Gm12678	ENSMUSG00000084854	predicted gene 12678 [Source:MGI Symbol;Acc:MGI:3650923]	98.6667	4.33333	7.33333	18.3333	18		22.7692	4.50901	1.03044e-13
Zbtb5	4	44991242	45012412	-		Zbtb5	ENSMUSG00000049657	zinc finger and BTB domain containing 5 [Source:MGI Symbol;Acc:MGI:1924601]	657.333	371.333	752	613.667	761.667		1.7702	0.82391	3.33773e-05
1700055D18Rik	4	45011687	45015406	+		Zbtb5	ENSMUSG00000049657	zinc finger and BTB domain containing 5 [Source:MGI Symbol;Acc:MGI:1924601]	34	12.3333	22.3333	19	28.6667		2.75676	1.46297	0.0316208
Stra6l	4	45848664	45887008	+		Stra6l	ENSMUSG00000028327	STRA6-like [Source:MGI Symbol;Acc:MGI:1921402]	285	723.667	79.6667	111.333	152		0.393828	-1.34436	0.00284685
Ccdc180	4	45890303	45950774	+		Ccdc180	ENSMUSG00000035539	coiled-coil domain containing 180 [Source:MGI Symbol;Acc:MGI:2685871]	22.3333	54.3333	41	82.3333	29		0.411043	-1.28264	0.0368672
Tdrd7	4	45965334	46034761	+		Tdrd7	ENSMUSG00000035517	tudor domain containing 7 [Source:MGI Symbol;Acc:MGI:2140279]	976	555.667	1465.67	1554	1294.67		1.75645	0.812661	1.33924e-06
Trmo	4	46376505	46389437	-		Trmo	ENSMUSG00000028331	tRNA methyltransferase O [Source:MGI Symbol;Acc:MGI:1922003]	156.333	245	221.333	192	300		0.638095	-0.648156	0.0132027
Hemgn	4	46393989	46413506	-		Hemgn	ENSMUSG00000028332	hemogen [Source:MGI Symbol;Acc:MGI:2136910]	5	399	52.3333	17	4.33333		0.0125313	-6.31832	8.64209e-07
Gabbr2	4	46662305	46991873	-		Gabbr2	ENSMUSG00000039809	gamma-aminobutyric acid (GABA) B receptor, 2 [Source:MGI Symbol;Acc:MGI:2386030]	19.3333	0	10.6667	1.33333	4		#DIV/0!	#DIV/0!	0.000984722
Invs	4	48279760	48431954	+		Invs	ENSMUSG00000028344	inversin [Source:MGI Symbol;Acc:MGI:1335082]	669	346	770.333	608.667	667.667		1.93353	0.951234	0.00594118
Fktn	4	53713998	53777890	+		Fktn	ENSMUSG00000028414	fukutin [Source:MGI Symbol;Acc:MGI:2179507]	321.333	185.333	147.333	148	274.667		1.73381	0.793948	0.0141918
Klf4	4	55527143	55532466	-		Klf4	ENSMUSG00000003032	Kruppel-like factor 4 (gut) [Source:MGI Symbol;Acc:MGI:1342287]	290.333	1064.33	123.667	270	352		0.272784	-1.87417	6.87155e-23
Ptpn3	4	57190841	57301837	-		Ptpn3	ENSMUSG00000038764	protein tyrosine phosphatase, non-receptor type 3 [Source:MGI Symbol;Acc:MGI:105307]	1025	284.333	565	407.667	475.667		3.60492	1.84997	0.000524736
Pakap	4	57568179	57896982	+		Palm2	ENSMUSG00000090053	paralemmin 2 [Source:MGI Symbol;Acc:MGI:1934601]	2118.67	645	1345	1728.33	2818.67		3.28475	1.71579	9.31083e-13
Akap2	4	57717657	57896984	+		Pakap	ENSMUSG00000089945	paralemmin A kinase anchor protein [Source:MGI Symbol;Acc:MGI:5141924]	2127.33	647	1352	1738.33	2840.33		3.288	1.71721	9.21453e-13
Zkscan16	4	58943628	58958355	+		Zkscan16	ENSMUSG00000038630	zinc finger with KRAB and SCAN domains 16 [Source:MGI Symbol;Acc:MGI:3510405]	21.3333	4.33333	6	6.66667	7		4.92308	2.29956	0.0194711
Dnajc25	4	58995062	59025573	+		Dnajc25	ENSMUSG00000070972	DnaJ heat shock protein family (Hsp40) member C25 [Source:MGI Symbol;Acc:MGI:1919679]	159.667	321	193.333	130	174		0.497404	-1.00751	1.58493e-05
Gm20503	4	59003210	59041888	+		Dnajc25	ENSMUSG00000070972	DnaJ heat shock protein family (Hsp40) member C25 [Source:MGI Symbol;Acc:MGI:1919679]	340.333	624	1332.33	1284.33	1290		0.545406	-0.874598	0.000256255
Gng10	4	59035088	59041903	+		Gm20503	ENSMUSG00000092345	predicted gene 20503 [Source:MGI Symbol;Acc:MGI:5141968]	349.333	643	1347.67	1294.67	1311		0.543287	-0.880214	0.000200291
Rgs3	4	62559847	62704001	+		Rgs3	ENSMUSG00000059810	regulator of G-protein signaling 3 [Source:MGI Symbol;Acc:MGI:1354734]	413.333	1013.33	853.333	879.333	710		0.407895	-1.29373	4.0101e-11
Tnfsf15	4	63727084	63745113	-		Tnfsf15	ENSMUSG00000050395	tumor necrosis factor (ligand) superfamily, member 15 [Source:MGI Symbol;Acc:MGI:2180140]	399.667	16.3333	104.667	81	4.33333		24.4694	4.61291	3.46436e-06
Tnc	4	63959785	64047015	-		Tnc	ENSMUSG00000028364	tenascin C [Source:MGI Symbol;Acc:MGI:101922]	64.3333	0	5.33333	8.66667	3.66667		#DIV/0!	#DIV/0!	1.24022e-09
8030451A03Rik	4	63979854	64149924	+		Tnc	ENSMUSG00000028364	tenascin C [Source:MGI Symbol;Acc:MGI:101922]	92.3333	0.666667	4.66667	9	2.33333		138.5	7.11374	7.73478e-09
Tle1	4	72117142	72200919	-		Tle1	ENSMUSG00000008305	transducin-like enhancer of split 1 [Source:MGI Symbol;Acc:MGI:104636]	351.333	552.667	143	141.333	558.333		0.635706	-0.653569	0.034554
C630043F03Rik	4	72201348	72215352	+		C630043F03Rik	ENSMUSG00000084910	RIKEN cDNA C630043F03 gene [Source:MGI Symbol;Acc:MGI:1915535]	8	26.3333	3	3.66667	11.3333		0.303797	-1.71882	0.0329526
Zdhhc21	4	82798738	82859958	-		Zdhhc21	ENSMUSG00000028403	zinc finger, DHHC domain containing 21 [Source:MGI Symbol;Acc:MGI:1915518]	832.667	524.333	658	503.333	885.333		1.58805	0.667255	0.000622935
Psip1	4	83455680	83486459	-		Snapc3	ENSMUSG00000028483	small nuclear RNA activating complex, polypeptide 3 [Source:MGI Symbol;Acc:MGI:1916338]	1041.33	1508	1778	1351	1868.33		0.690539	-0.534204	0.000839545
Cntln	4	84884309	85131921	+		Cntln	ENSMUSG00000038070	centlein, centrosomal protein [Source:MGI Symbol;Acc:MGI:2443104]	423.333	235	152.333	124.333	160.333		1.80142	0.849133	0.031367
Rraga	4	86575668	86577285	+		Rraga	ENSMUSG00000070934	Ras-related GTP binding A [Source:MGI Symbol;Acc:MGI:1915691]	478	675.333	1571	1036	1428		0.707799	-0.498589	0.0365055
Gm12606	4	89235699	89273403	-		Gm12606	ENSMUSG00000087659	predicted gene 12606 [Source:MGI Symbol;Acc:MGI:3649222]	11.6667	0.333333	43.6667	2.66667	12		35	5.12928	0.0166352
Cdkn2a	4	89274471	89294653	-		Cdkn2a	ENSMUSG00000044303	cyclin-dependent kinase inhibitor 2A [Source:MGI Symbol;Acc:MGI:104738]	43.3333	10.6667	63.3333	61.6667	115		4.0625	2.02237	0.0254558
Cdkn2b	4	89306289	89311032	-		Cdkn2b	ENSMUSG00000073802	cyclin-dependent kinase inhibitor 2B (p15, inhibits CDK4) [Source:MGI Symbol;Acc:MGI:104737]	223.667	52.6667	208.333	280.333	445		4.24684	2.08639	0.000832434
Dmrta1	4	89679436	89694772	+		Dmrta1	ENSMUSG00000043753	doublesex and mab-3 related transcription factor like family A1 [Source:MGI Symbol;Acc:MGI:2653627]	25	117.333	11.3333	15.6667	32.3333		0.213068	-2.23061	0.0276527
Jun	4	95049034	95052222	-		Jun	ENSMUSG00000052684	jun proto-oncogene [Source:MGI Symbol;Acc:MGI:96646]	781.667	2675.33	1547	1374.67	1811		0.292175	-1.77509	8.9266e-14
Junos	4	95051534	95167318	+		Jun	ENSMUSG00000052684	jun proto-oncogene [Source:MGI Symbol;Acc:MGI:96646]	57	173	90.6667	74.3333	100.667		0.32948	-1.60174	6.11936e-06
Dock7	4	98936671	99120915	-		Dock7	ENSMUSG00000028556	dedicator of cytokinesis 7 [Source:MGI Symbol;Acc:MGI:1914549]	870.667	350.333	310.667	305.333	548.667		2.48525	1.31339	4.68664e-07
Atg4c	4	99193934	99259787	+		Atg4c	ENSMUSG00000028550	autophagy related 4C, cysteine peptidase [Source:MGI Symbol;Acc:MGI:2651854]	431.667	225.333	254	234.667	365.333		1.91568	0.937857	5.43234e-06
Raver2	4	101068983	101152370	+		Raver2	ENSMUSG00000035275	ribonucleoprotein, PTB-binding 2 [Source:MGI Symbol;Acc:MGI:2443623]	32.6667	143.333	14.6667	10.6667	31.3333		0.227907	-2.13348	1.82476e-09
Lepr	4	101717404	101815352	+		Lepr	ENSMUSG00000057722	leptin receptor [Source:MGI Symbol;Acc:MGI:104993]	297.333	16.3333	5	1	1		18.2041	4.18619	2.41745e-20
Sgip1	4	102741297	102973628	+		Sgip1	ENSMUSG00000028524	SH3-domain GRB2-like (endophilin) interacting protein 1 [Source:MGI Symbol;Acc:MGI:1920344]	184.333	102.667	31.6667	37.6667	19		1.79545	0.844349	0.0160644
Prkaa2	4	105029874	105109890	-		Prkaa2	ENSMUSG00000028518	protein kinase, AMP-activated, alpha 2 catalytic subunit [Source:MGI Symbol;Acc:MGI:1336173]	50	3.66667	9	11	5.33333		13.6364	3.76939	8.89229e-07
Mroh7	4	106680417	106730925	-		Mroh7	ENSMUSG00000047502	maestro heat-like repeat family member 7 [Source:MGI Symbol;Acc:MGI:2685873]	0.666667	20	3	9.66667	1.66667		0.0333333	-4.90689	0.00233306
Acot11	4	106744555	106804998	-		Fam151a	ENSMUSG00000034871	family with sequence simliarity 151, member A [Source:MGI Symbol;Acc:MGI:2657115]	231.667	359.667	166.667	177	238.333		0.644115	-0.63461	0.0285695
Dmrtb1	4	107676290	107684230	-		Dmrtb1	ENSMUSG00000028610	DMRT-like family B with proline-rich C- terminal, 1 [Source:MGI Symbol;Acc:MGI:1927125]	0.333333	12	0	0	0		0.0277778	-5.16992	0.0231158
Cpt2	4	107903981	107923610	-		Cpt2	ENSMUSG00000028607	carnitine palmitoyltransferase 2 [Source:MGI Symbol;Acc:MGI:109176]	352	204.333	430.333	402	477.667		1.72268	0.784651	0.00118053
Echdc2	4	108165437	108179308	+		Echdc2	ENSMUSG00000028601	enoyl Coenzyme A hydratase domain containing 2 [Source:MGI Symbol;Acc:MGI:1289238]	46	4.66667	9.66667	24.6667	12		9.85714	3.30117	0.00070982
Kti12	4	108847785	108849413	+		Txndc12	ENSMUSG00000028567	thioredoxin domain containing 12 (endoplasmic reticulum) [Source:MGI Symbol;Acc:MGI:1913323]	242	379.333	646.333	499.333	658		0.637961	-0.648459	0.00142362
Skint3	4	112232245	112300468	+		Skint3	ENSMUSG00000070868	selection and upkeep of intraepithelial T cells 3 [Source:MGI Symbol;Acc:MGI:3045331]	82	343.667	28	32.3333	44.3333		0.238603	-2.06731	4.11208e-08
Trabd2b	4	114406724	114615098	+		Trabd2b	ENSMUSG00000070867	TraB domain containing 2B [Source:MGI Symbol;Acc:MGI:3650152]	2.33333	44.6667	15	14.3333	0		0.0522388	-4.25873	0.000468449
Tal1	4	115056426	115071755	+		Tal1	ENSMUSG00000028717	T cell acute lymphocytic leukemia 1 [Source:MGI Symbol;Acc:MGI:98480]	29	347.667	57.6667	96	4.66667		0.0834132	-3.58358	1.72562e-05
St3gal3	4	117932154	118134914	-		St3gal3	ENSMUSG00000028538	ST3 beta-galactoside alpha-2,3- sialyltransferase 3 [Source:MGI Symbol;Acc:MGI:1316659]	479.667	194.667	1377	750	603		2.46404	1.30103	0.000509067
Kdm4a	4	118136957	118180043	-		Kdm4a	ENSMUSG00000033326	lysine (K)-specific demethylase 4A [Source:MGI Symbol;Acc:MGI:2446210]	1758.33	1095.33	3727.33	3174	3771.33		1.6053	0.682839	1.44615e-05
Zfp691	4	119169513	119174195	-		Zfp691	ENSMUSG00000045268	zinc finger protein 691 [Source:MGI Symbol;Acc:MGI:3041163]	235.667	122	317.333	321	330		1.93169	0.949867	0.0101173
Ermap	4	119175457	119190011	-		Ermap	ENSMUSG00000028644	erythroblast membrane-associated protein [Source:MGI Symbol;Acc:MGI:1349816]	93.3333	531.667	62.3333	49.6667	49.3333		0.175549	-2.51006	0.000123163
P3h1	4	119232915	119248975	+		P3h1	ENSMUSG00000028641	prolyl 3-hydroxylase 1 [Source:MGI Symbol;Acc:MGI:1888921]	383.333	100.333	109	243.333	248.667		3.8206	1.9338	0.000253018
Cited4	4	120666572	120667820	+		Cited4	ENSMUSG00000070803	Cbp/p300-interacting transactivator, with Glu/Asp-rich carboxy-terminal domain, 4 [Source:MGI Symbol;Acc:MGI:1861694]	6.33333	107	24.6667	12.3333	25		0.05919	-4.0785	9.43652e-06
Col9a2	4	121039385	121055322	+		Col9a2	ENSMUSG00000028626	collagen, type IX, alpha 2 [Source:MGI Symbol;Acc:MGI:88466]	18.3333	1	2	10.6667	9		18.3333	4.1964	0.00585833
Ppt1	4	122836242	122859175	+		Ppt1	ENSMUSG00000028657	palmitoyl-protein thioesterase 1 [Source:MGI Symbol;Acc:MGI:1298204]	1026	1835.67	1937.33	2152	2027		0.558925	-0.839273	0.0026056
Mycl	4	122995652	123002485	+		Mycl	ENSMUSG00000028654	v-myc avian myelocytomatosis viral oncogene lung carcinoma derived [Source:MGI Symbol;Acc:MGI:96799]	184	641	142.333	285.333	322.667		0.287051	-1.80062	3.33331e-07
Trit1	4	123016597	123054949	+		Trit1	ENSMUSG00000028653	tRNA isopentenyltransferase 1 [Source:MGI Symbol;Acc:MGI:1914216]	281.667	428.333	393.667	402	509		0.657588	-0.604745	0.00145203
Heyl	4	123233556	123249875	+		Heyl	ENSMUSG00000032744	hairy/enhancer-of-split related with YRPW motif-like [Source:MGI Symbol;Acc:MGI:1860511]	95.6667	17	25.6667	30.6667	2.66667		5.62745	2.49248	0.000134513
Fhl3	4	124700701	124708611	+		Fhl3	ENSMUSG00000032643	four and a half LIM domains 3 [Source:MGI Symbol;Acc:MGI:1341092]	253.667	123	251.667	428.333	466.667		2.06233	1.04428	0.000421794
Yrdc	4	124850679	124855242	+		1110065P20Rik	ENSMUSG00000078570	RIKEN cDNA 1110065P20 gene [Source:MGI Symbol;Acc:MGI:1916170]	301.667	515.333	669.667	526.333	708		0.585382	-0.772551	0.000287743
Col8a2	4	126286793	126314330	+		Col8a2	ENSMUSG00000056174	collagen, type VIII, alpha 2 [Source:MGI Symbol;Acc:MGI:88464]	2.33333	74.6667	7	2.66667	10.6667		0.03125	-5	8.79676e-08
Ago1	4	126435012	126468583	-		Ago1	ENSMUSG00000041530	argonaute RISC catalytic subunit 1 [Source:MGI Symbol;Acc:MGI:2446630]	1927.67	1187.67	2405.67	2025	3437		1.62307	0.698726	2.50091e-05
Zmym6	4	127077383	127124372	+		Zmym6	ENSMUSG00000042408	zinc finger, MYM-type 6 [Source:MGI Symbol;Acc:MGI:106505]	760.333	502	516.667	506.333	889		1.51461	0.598945	0.040724
Tlr12	4	128615443	128618619	-		Tlr12	ENSMUSG00000062545	toll-like receptor 12 [Source:MGI Symbol;Acc:MGI:3045221]	135	244.333	202	162.667	395.333		0.552524	-0.855891	0.0403278
Zfp362	4	128773088	128806045	-		Zfp362	ENSMUSG00000028799	zinc finger protein 362 [Source:MGI Symbol;Acc:MGI:2652839]	946.667	601.667	2231	2334.67	2154.33		1.57341	0.653892	0.000183304
Fndc5	4	129136999	129144593	+		Fndc5	ENSMUSG00000001334	fibronectin type III domain containing 5 [Source:MGI Symbol;Acc:MGI:1917614]	10.6667	64.3333	52.3333	12	29.3333		0.165803	-2.59246	0.0249766
Sync	4	129287617	129308559	+		Sync	ENSMUSG00000001333	syncoilin [Source:MGI Symbol;Acc:MGI:1916078]	37	75.6667	27.3333	16.6667	32.6667		0.488987	-1.03213	0.0283061
Gm12979	4	129491969	129509746	-		Gm12979	ENSMUSG00000086336	predicted gene 12979 [Source:MGI Symbol;Acc:MGI:3651303]	19.6667	1.66667	8	4	37.3333		11.8	3.56071	0.0330692
Marcksl1	4	129513581	129515985	+		Marcksl1	ENSMUSG00000047945	MARCKS-like 1 [Source:MGI Symbol;Acc:MGI:97143]	1257	693.667	8688	11350.3	8131.33		1.81211	0.85767	0.000300641
Lck	4	129548344	129573641	-		Lck	ENSMUSG00000000409	lymphocyte protein tyrosine kinase [Source:MGI Symbol;Acc:MGI:96756]	607.333	1379.67	2501.33	2372.33	2488.33		0.440203	-1.18376	1.81599e-06
Adgrb2	4	129984870	130022633	+		Adgrb2	ENSMUSG00000028782	adhesion G protein-coupled receptor B2 [Source:MGI Symbol;Acc:MGI:2451244]	1	12.3333	0.333333	1.33333	4		0.0810811	-3.62449	0.028532
Gm12972	4	130786069	130787855	+		Gm12972	ENSMUSG00000086548	predicted gene 12972 [Source:MGI Symbol;Acc:MGI:3650043]	0.666667	18	1	0	0		0.037037	-4.75489	0.00586145
Tmem200b	4	131921771	131923140	+		Tmem200b	ENSMUSG00000070720	transmembrane protein 200B [Source:MGI Symbol;Acc:MGI:3646343]	52	4.66667	14.6667	46.3333	68		11.1429	3.47805	0.00226412
Epb41	4	131923413	132075321	-		Epb41	ENSMUSG00000028906	erythrocyte membrane protein band 4.1 [Source:MGI Symbol;Acc:MGI:95401]	3147.33	2239.33	5673.67	6229.33	5604.33		1.40548	0.491061	0.0435248
Gm37711	4	132104830	132109363	-		Gm37711	ENSMUSG00000102796	predicted gene, 37711 [Source:MGI Symbol;Acc:MGI:5610939]	159.333	4.33333	119	84.3333	90		36.7692	5.20043	2.55154e-21
Oprd1	4	132110726	132144486	-		Oprd1	ENSMUSG00000050511	opioid receptor, delta 1 [Source:MGI Symbol;Acc:MGI:97438]	494.667	23.3333	612.333	387.667	303.333		21.2	4.40599	1.17764e-19
Snhg12	4	132308678	132311024	+		Snhg12	ENSMUSG00000086290	small nucleolar RNA host gene 12 [Source:MGI Symbol;Acc:MGI:1916721]	216.333	350	469.333	536.667	511		0.618095	-0.694099	0.0111137
Rpa2	4	132768332	132778752	+		Rpa2	ENSMUSG00000028884	replication protein A2 [Source:MGI Symbol;Acc:MGI:1339939]	351.333	477	888.333	637.667	786.667		0.736548	-0.441149	0.0307461
Themis2	4	132781843	132796387	-		Themis2	ENSMUSG00000037731	thymocyte selection associated family member 2 [Source:MGI Symbol;Acc:MGI:2446213]	908	1579.33	2913	2747	3067		0.574926	-0.798552	0.00105508
Ppp1r8	4	132826929	132843169	-		Ppp1r8	ENSMUSG00000028882	protein phosphatase 1, regulatory (inhibitor) subunit 8 [Source:MGI Symbol;Acc:MGI:2140494]	502	711.667	1158.33	941.333	1131		0.705386	-0.503514	0.0144145
Stx12	4	132853501	132884509	-		Stx12	ENSMUSG00000028879	syntaxin 12 [Source:MGI Symbol;Acc:MGI:1931027]	970	718.667	1299	1089	1274.67		1.34972	0.432662	0.0355686
Fgr	4	132974095	133001910	+		Fgr	ENSMUSG00000028874	FGR proto-oncogene, Src family tyrosine kinase [Source:MGI Symbol;Acc:MGI:95527]	1033.33	1510	1496.33	3268.33	2138		0.684327	-0.547243	0.0168563
Wdtc1	4	133292459	133353481	-		Wdtc1	ENSMUSG00000037622	WD and tetratricopeptide repeats 1 [Source:MGI Symbol;Acc:MGI:2685541]	984	556.667	1740	1801.67	1984.33		1.76766	0.821845	0.00021416
Slc9a1	4	133369706	133423702	+		Slc9a1	ENSMUSG00000028854	solute carrier family 9 (sodium/hydrogen exchanger), member 1 [Source:MGI Symbol;Acc:MGI:102462]	934	607.667	1473.33	1285	1766.33		1.53703	0.620142	0.0153096
Zfp683	4	134053838	134058996	+		Zfp683	ENSMUSG00000049410	zinc finger protein 683 [Source:MGI Symbol;Acc:MGI:3650254]	0.333333	45	0	0	5.33333		0.00740741	-7.07682	5.14343e-05
Zfp593	4	134243289	134245592	-		Zfp593	ENSMUSG00000028840	zinc finger protein 593 [Source:MGI Symbol;Acc:MGI:1915290]	170.333	279.667	423	355.667	377.667		0.609058	-0.715348	0.00143936
E130218I03Rik	4	134243662	134245873	+		Zfp593	ENSMUSG00000028840	zinc finger protein 593 [Source:MGI Symbol;Acc:MGI:1915290]	144.333	228.667	384	315.667	326.333		0.631195	-0.663842	0.00716702
Slc30a2	4	134343181	134354484	+		Slc30a2	ENSMUSG00000028836	solute carrier family 30 (zinc transporter), member 2 [Source:MGI Symbol;Acc:MGI:106637]	30.6667	4	24.3333	29.3333	17.6667		7.66667	2.9386	0.00295622
Extl1	4	134356372	134383850	-		Extl1	ENSMUSG00000028838	exostoses (multiple)-like 1 [Source:MGI Symbol;Acc:MGI:1888742]	555	52.6667	90.3333	348	585.333		10.538	3.39753	5.70905e-16
Stmn1	4	134468320	134473843	+		Stmn1	ENSMUSG00000028832	stathmin 1 [Source:MGI Symbol;Acc:MGI:96739]	86	158.333	407.333	235	230		0.543158	-0.880556	0.0135073
Paqr7	4	134496697	134510235	+		Paqr7	ENSMUSG00000037348	progestin and adipoQ receptor family member VII [Source:MGI Symbol;Acc:MGI:1919154]	148.667	282	200.333	267.333	281.333		0.527187	-0.923614	0.000181106
Rhd	4	134864536	134896172	+		Rhd	ENSMUSG00000028825	Rh blood group, D antigen [Source:MGI Symbol;Acc:MGI:1202882]	9	240.667	23.3333	35.6667	5.66667		0.0373961	-4.74097	3.15494e-07
Syf2	4	134930898	134937548	+		Syf2	ENSMUSG00000028821	SYF2 homolog, RNA splicing factor (S. cerevisiae) [Source:MGI Symbol;Acc:MGI:1915842]	665	951.667	2333.33	2445	2569.67		0.698774	-0.517102	0.0184158
Rcan3	4	135412308	135433853	-		Rcan3	ENSMUSG00000059713	regulator of calcineurin 3 [Source:MGI Symbol;Acc:MGI:1858220]	650.333	379	506.667	479.667	694		1.71592	0.778981	0.00016885
Myom3	4	135759715	135815564	+		Myom3	ENSMUSG00000037139	myomesin family, member 3 [Source:MGI Symbol;Acc:MGI:2685280]	41.6667	1.33333	0.666667	1	0		31.25	4.96578	0.000445815
Cnr2	4	135895394	135920207	+		Cnr2	ENSMUSG00000062585	cannabinoid receptor 2 (macrophage) [Source:MGI Symbol;Acc:MGI:104650]	666.333	1234.33	1148.33	971	1823.67		0.539833	-0.889416	0.00231928
E2f2	4	136172394	136196057	+		E2f2	ENSMUSG00000018983	E2F transcription factor 2 [Source:MGI Symbol;Acc:MGI:1096341]	749.333	1025.67	1975.67	1809.33	1737		0.730582	-0.452882	0.0139156
Hspg2	4	137468769	137570630	+		Hspg2	ENSMUSG00000028763	perlecan (heparan sulfate proteoglycan 2) [Source:MGI Symbol;Acc:MGI:96257]	126.667	17.3333	195	159	97.6667		7.30769	2.86942	5.8944e-09
Alpl	4	137741733	137796384	-		Alpl	ENSMUSG00000028766	alkaline phosphatase, liver/bone/kidney [Source:MGI Symbol;Acc:MGI:87983]	931	138	912.667	507.333	343.333		6.74638	2.75411	2.44999e-11
Pla2g2d	4	138775735	138782046	+		Pla2g2d	ENSMUSG00000041202	phospholipase A2, group IID [Source:MGI Symbol;Acc:MGI:1341796]	43.3333	294	25.6667	71	65		0.147392	-2.76227	4.84005e-16
Nbl1	4	139082284	139092993	-		Nbl1	ENSMUSG00000041120	neuroblastoma, suppression of tumorigenicity 1 [Source:MGI Symbol;Acc:MGI:104591]	140.667	44	193.667	167	133		3.19697	1.67671	0.00431729
Mrto4	4	139347435	139352576	-		Mrto4	ENSMUSG00000028741	mRNA turnover 4, ribosome maturation factor [Source:MGI Symbol;Acc:MGI:1917152]	262.333	371	603	490.667	578		0.707098	-0.500018	0.0382625
Arhgef10l	4	140514485	140666012	-		Arhgef10l	ENSMUSG00000040964	Rho guanine nucleotide exchange factor (GEF) 10-like [Source:MGI Symbol;Acc:MGI:1920004]	1146.67	399	412.667	771	802.667		2.87385	1.52299	6.57338e-05
Padi4	4	140745865	140774236	-		Padi4	ENSMUSG00000025330	peptidyl arginine deiminase, type IV [Source:MGI Symbol;Acc:MGI:1338898]	20.3333	58.3333	104	1291.67	12.6667		0.348571	-1.52047	0.00756975
Padi2	4	140906344	140952586	+		Padi2	ENSMUSG00000028927	peptidyl arginine deiminase, type II [Source:MGI Symbol;Acc:MGI:1338892]	529.333	980.667	448	736.333	929		0.539769	-0.889586	2.11031e-09
Epha2	4	141301240	141329384	+		Epha2	ENSMUSG00000006445	Eph receptor A2 [Source:MGI Symbol;Acc:MGI:95278]	87.3333	206	120	116.667	194		0.423948	-1.23804	0.00127985
Fblim1	4	141576062	141606096	-		Fblim1	ENSMUSG00000006219	filamin binding LIM protein 1 [Source:MGI Symbol;Acc:MGI:1921452]	783.667	157	276	331.667	1194.33		4.99151	2.31948	8.752e-26
Plekhm2	4	141625734	141664899	-		Plekhm2	ENSMUSG00000028917	pleckstrin homology domain containing, family M (with RUN domain) member 2 [Source:MGI Symbol;Acc:MGI:1916832]	1901.33	966.667	2245.67	3453	4477		1.9669	0.975921	0.000498766
Dnajc16	4	141760189	141790931	-		Dnajc16	ENSMUSG00000040697	DnaJ heat shock protein family (Hsp40) member C16 [Source:MGI Symbol;Acc:MGI:2442146]	725.333	485.667	738.333	623	926		1.49348	0.578678	0.0139028
Casp9	4	141793612	141815976	+		Casp9	ENSMUSG00000028914	caspase 9 [Source:MGI Symbol;Acc:MGI:1277950]	917	629.333	2001	1611.67	1543.33		1.4571	0.543097	0.0465275
Pdpn	4	143267431	143299564	-		Pdpn	ENSMUSG00000028583	podoplanin [Source:MGI Symbol;Acc:MGI:103098]	23.6667	2	25.3333	105.667	0		11.8333	3.56478	0.0158717
Plod1	4	147909753	147936767	-		Plod1	ENSMUSG00000019055	procollagen-lysine, 2-oxoglutarate 5- dioxygenase 1 [Source:MGI Symbol;Acc:MGI:99907]	713.333	381.333	472.333	465.333	1078		1.87063	0.903524	6.81833e-06
2510039O18Rik	4	147940895	147947314	+		2510039O18Rik	ENSMUSG00000044496	RIKEN cDNA 2510039O18 gene [Source:MGI Symbol;Acc:MGI:1924284]	727.333	958.333	2428	2263.67	2322		0.758957	-0.397911	0.0321971
Ube4b	4	149328416	149426749	-		Ube4b	ENSMUSG00000028960	ubiquitination factor E4B [Source:MGI Symbol;Acc:MGI:1927086]	1362	964.333	1834.67	1623.67	2502.67		1.41237	0.498123	0.0412508
Nmnat1	4	149467572	149485202	-		Nmnat1	ENSMUSG00000028992	nicotinamide nucleotide adenylyltransferase 1 [Source:MGI Symbol;Acc:MGI:1913704]	188.333	95.6667	177.333	196.333	200.333		1.96864	0.9772	0.0410134
Gm37795	4	150068539	150070997	+		Mir34a	ENSMUSG00000065493	microRNA 34a [Source:MGI Symbol;Acc:MGI:3619363]	592.333	35	53.3333	74.3333	469		16.9238	4.08098	0.000756771
Gpr157	4	150087365	150105927	+		Gpr157	ENSMUSG00000047875	G protein-coupled receptor 157 [Source:MGI Symbol;Acc:MGI:2442046]	895.667	321	1226.67	635	1548.33		2.79024	1.48039	1.62674e-06
Tnfrsf9	4	150914562	150946102	+		Tnfrsf9	ENSMUSG00000028965	tumor necrosis factor receptor superfamily, member 9 [Source:MGI Symbol;Acc:MGI:1101059]	1163.33	559.333	500.667	1084.67	1588		2.07986	1.05648	0.0122326
Vamp3	4	151047300	151057963	-		Camta1	ENSMUSG00000014592	calmodulin binding transcription activator 1 [Source:MGI Symbol;Acc:MGI:2140230]	726.667	984.667	1568	1390.67	1586		0.737982	-0.438342	0.0308474
Plekhg5	4	152072498	152115400	+		Plekhg5	ENSMUSG00000039713	pleckstrin homology domain containing, family G (with RhoGef domain) member 5 [Source:MGI Symbol;Acc:MGI:2652860]	108.667	187.667	108.667	107.667	117.667		0.579041	-0.788263	0.0353287
Kcnab2	4	152390742	152477871	-		Kcnab2	ENSMUSG00000028931	potassium voltage-gated channel, shaker- related subfamily, beta member 2 [Source:MGI Symbol;Acc:MGI:109239]	727.333	1179.67	2051.33	2192.33	2510.67		0.616558	-0.697691	1.82156e-06
Dffb	4	153964449	153975126	-		Dffb	ENSMUSG00000029027	DNA fragmentation factor, beta subunit [Source:MGI Symbol;Acc:MGI:1196287]	206.333	314.667	313	271.333	411		0.65572	-0.608847	0.00830508
Smim1	4	154020470	154026230	-		Lrrc47	ENSMUSG00000029028	leucine rich repeat containing 47 [Source:MGI Symbol;Acc:MGI:1920196]	258.667	375	666	684.333	792.333		0.689778	-0.535796	0.0213868
Acap3	4	155891822	155907251	+		Acap3	ENSMUSG00000029033	ArfGAP with coiled-coil, ankyrin repeat and PH domains 3 [Source:MGI Symbol;Acc:MGI:2153589]	226.667	403.667	329.333	343.667	477.333		0.561519	-0.832592	0.0169176
Tnfrsf4	4	156013843	156016612	+		Tnfrsf4	ENSMUSG00000029075	tumor necrosis factor receptor superfamily, member 4 [Source:MGI Symbol;Acc:MGI:104512]	459	153.667	633	1219.67	1255.33		2.98698	1.57869	7.87906e-13
Agrn	4	156165290	156197488	-		Agrn	ENSMUSG00000041936	agrin [Source:MGI Symbol;Acc:MGI:87961]	801.333	211.333	603.333	845	763.333		3.7918	1.92288	6.52141e-12
AW011738	4	156203304	156205151	+		AW011738	ENSMUSG00000078349	expressed sequence AW011738 [Source:MGI Symbol;Acc:MGI:2140540]	72	145.333	271.667	134	85		0.495413	-1.0133	0.0322258
Perm1	4	156215868	156221307	+		Perm1	ENSMUSG00000078486	PPARGC1 and ESRR induced regulator, muscle 1 [Source:MGI Symbol;Acc:MGI:1921433]	165.333	59.3333	94	114.333	114		2.78652	1.47846	0.0148506
Plekhn1	4	156221456	156234857	-		Plekhn1	ENSMUSG00000078485	pleckstrin homology domain containing, family N member 1 [Source:MGI Symbol;Acc:MGI:2387630]	1001.67	550.333	886.667	950.667	1366		1.82011	0.864025	0.0469149
Rbm48	5	3583978	3596585	-		1700109H08Rik	ENSMUSG00000008307	RIKEN cDNA 1700109H08 gene [Source:MGI Symbol;Acc:MGI:1924286]	253	410.667	331.667	307.667	407.667		0.616071	-0.69883	0.000477016
Cdk14	5	4803391	5420312	-		Cdk14	ENSMUSG00000028926	cyclin-dependent kinase 14 [Source:MGI Symbol;Acc:MGI:894318]	469.333	701	292.333	320	332.333		0.66952	-0.578801	0.00282902
Gm8773	5	5573799	5576203	+		Gm8773	ENSMUSG00000073234	predicted gene 8773 [Source:MGI Symbol;Acc:MGI:3646213]	22.6667	2.33333	11.6667	14	35.6667		9.71429	3.28011	0.045088
Dbf4	5	8396973	8422716	-		Dbf4	ENSMUSG00000002297	DBF4 zinc finger [Source:MGI Symbol;Acc:MGI:1351328]	397	612.667	543	355	505		0.647987	-0.625963	0.00226412
Dmtf1	5	9118801	9161776	-		Tmem243	ENSMUSG00000079659	transmembrane protein 243, mitochondrial [Source:MGI Symbol;Acc:MGI:3606159]	1086.33	1407	996.333	1009	1640.33		0.772092	-0.373155	0.0115203
Kcnh2	5	24319589	24351604	-		Kcnh2	ENSMUSG00000038319	potassium voltage-gated channel, subfamily H (eag-related), member 2 [Source:MGI Symbol;Acc:MGI:1341722]	2.66667	32.6667	4.33333	9.33333	13		0.0816327	-3.61471	0.000419389
Atg9b	5	24384181	24392143	-		Nos3	ENSMUSG00000028978	nitric oxide synthase 3, endothelial cell [Source:MGI Symbol;Acc:MGI:97362]	5	31.6667	1.66667	4	4		0.157895	-2.66296	0.00144982
Abcb8	5	24393663	24410054	+		Abcb8	ENSMUSG00000028973	ATP-binding cassette, sub-family B (MDR/TAP), member 8 [Source:MGI Symbol;Acc:MGI:1351667]	535.333	242.333	683	587.333	539		2.20908	1.14344	2.22542e-06
Asic3	5	24413392	24417835	+		Asic3	ENSMUSG00000038276	acid-sensing (proton-gated) ion channel 3 [Source:MGI Symbol;Acc:MGI:2159339]	307.667	4.66667	31	47	11.6667		65.9286	6.04283	3.91073e-28
Gm42585	5	25369020	25373039	+		Kmt2c	ENSMUSG00000038056	lysine (K)-specific methyltransferase 2C [Source:MGI Symbol;Acc:MGI:2444959]	40	81	17	18	57.3333		0.493827	-1.01792	0.0350366
Gm42450	5	29886728	29891964	-		Gm42450	ENSMUSG00000105437	predicted gene 42450 [Source:MGI Symbol;Acc:MGI:5662587]	10	0	9.66667	1	4.66667		#DIV/0!	#DIV/0!	0.0361426
Il6	5	30013114	30019981	+		Il6	ENSMUSG00000025746	interleukin 6 [Source:MGI Symbol;Acc:MGI:96559]	256	62.6667	257	138.333	60.6667		4.08511	2.03037	0.015726
Slc35f6	5	30647933	30659729	+		Slc35f6	ENSMUSG00000029175	solute carrier family 35, member F6 [Source:MGI Symbol;Acc:MGI:1922169]	1074.33	575.667	864.333	922	1573.33		1.86624	0.900136	0.0109641
Cenpa	5	30666777	30674830	+		Cenpa	ENSMUSG00000029177	centromere protein A [Source:MGI Symbol;Acc:MGI:88375]	1066.33	697.667	1366.67	1163.67	1104		1.52843	0.612049	0.0110252
Dpysl5	5	30711564	30799375	+		Dpysl5	ENSMUSG00000029168	dihydropyrimidinase-like 5 [Source:MGI Symbol;Acc:MGI:1929772]	654	29.6667	71.6667	459	174.667		22.0449	4.46238	1.38793e-20
Ift172	5	31253277	31291116	-		Ift172	ENSMUSG00000038564	intraflagellar transport 172 [Source:MGI Symbol;Acc:MGI:2682064]	668	354.667	685	690.333	989.667		1.88346	0.913384	5.90198e-07
Plb1	5	32232708	32366520	+		Plb1	ENSMUSG00000029134	phospholipase B1 [Source:MGI Symbol;Acc:MGI:1922406]	27.3333	4.66667	8	15.3333	14		5.85714	2.5502	0.0419947
Depdc5	5	32863701	32994236	+		Depdc5	ENSMUSG00000037426	DEP domain containing 5 [Source:MGI Symbol;Acc:MGI:2141101]	1578.67	606	1250	1169.33	1658.33		2.60506	1.38132	8.41515e-13
Spon2	5	33198184	33218455	-		Spon2	ENSMUSG00000037379	spondin 2, extracellular matrix protein [Source:MGI Symbol;Acc:MGI:1923724]	0	9.66667	0	0.333333	0.333333		0	#NUM!	0.00808981
Haus3	5	34153880	34169527	-		Poln	ENSMUSG00000045102	DNA polymerase N [Source:MGI Symbol;Acc:MGI:2675617]	362.667	564.333	597	483	549.667		0.642646	-0.637903	0.00644578
Mxd4	5	34173883	34187720	-		Mxd4	ENSMUSG00000037235	Max dimerization protein 4 [Source:MGI Symbol;Acc:MGI:104991]	1259.33	1775.67	4316	4117.33	3213.33		0.709217	-0.4957	0.0220095
Gm42846	5	34173887	34174887	+		Mxd4	ENSMUSG00000037235	Max dimerization protein 4 [Source:MGI Symbol;Acc:MGI:104991]	152.333	238	756.667	881.333	576.333		0.640056	-0.64373	0.0141827
Htt	5	34761740	34912534	+		Htt	ENSMUSG00000029104	huntingtin [Source:MGI Symbol;Acc:MGI:96067]	1761.33	1222.33	1925.67	1579.67	2047.67		1.44096	0.52703	0.0325132
Sh3tc1	5	35697180	35739987	-		Sh3tc1	ENSMUSG00000036553	SH3 domain and tetratricopeptide repeats 1 [Source:MGI Symbol;Acc:MGI:2678949]	262.333	459.667	783.333	372	734.333		0.570703	-0.809187	0.013763
Afap1	5	35893319	36003923	+		Afap1	ENSMUSG00000029094	actin filament associated protein 1 [Source:MGI Symbol;Acc:MGI:1917542]	404	120.667	398	368.667	218.667		3.34807	1.74333	1.43152e-12
Grpel1	5	36464998	36474080	+		Grpel1	ENSMUSG00000029198	GrpE-like 1, mitochondrial [Source:MGI Symbol;Acc:MGI:1334417]	468	696.667	1171	1106	1303.67		0.67177	-0.57396	0.00318406
Tada2b	5	36473670	36484285	-		Grpel1	ENSMUSG00000029198	GrpE-like 1, mitochondrial [Source:MGI Symbol;Acc:MGI:1334417]	435	639	557	466.667	768.333		0.680751	-0.554801	0.00381861
Jakmip1	5	37028335	37150607	+		Jakmip1	ENSMUSG00000063646	janus kinase and microtubule interacting protein 1 [Source:MGI Symbol;Acc:MGI:1923321]	407.333	765	801	737.667	1455.33		0.532462	-0.90925	3.25994e-05
Evc	5	37289098	37336894	-		Crmp1	ENSMUSG00000029121	collapsin response mediator protein 1 [Source:MGI Symbol;Acc:MGI:107793]	2	25.6667	2.33333	4	4.66667		0.0779221	-3.68182	0.00648628
Clnk	5	38706462	38876812	-		Clnk	ENSMUSG00000039315	cytokine-dependent hematopoietic cell linker [Source:MGI Symbol;Acc:MGI:1351468]	10	104.667	7	11	10.6667		0.0955414	-3.38773	2.43315e-11
Hs3st1	5	39613935	39755475	-		Hs3st1	ENSMUSG00000051022	heparan sulfate (glucosamine) 3-O- sulfotransferase 1 [Source:MGI Symbol;Acc:MGI:1201606]	180.667	308.333	303.667	316.333	382.667		0.585946	-0.771161	0.0156974
Cc2d2a	5	43662346	43740972	+		Cc2d2a	ENSMUSG00000039765	coiled-coil and C2 domain containing 2A [Source:MGI Symbol;Acc:MGI:1924487]	124.333	20	58.6667	106	158.667		6.21667	2.63614	1.22368e-07
Gm43303	5	45192669	45251929	-		D5Ertd615e	ENSMUSG00000029092	DNA segment, Chr 5, ERATO Doi 615, expressed [Source:MGI Symbol;Acc:MGI:1277236]	0	7.33333	0.333333	0	0		0	#NUM!	0.023244
Ppargc1a	5	51454250	51567726	-		Ppargc1a	ENSMUSG00000029167	peroxisome proliferative activated receptor, gamma, coactivator 1 alpha [Source:MGI Symbol;Acc:MGI:1342774]	265	49.3333	27.6667	43	127.667		5.37162	2.42536	8.89448e-06
Gm43177	5	52117312	52118523	+		Gm43177	ENSMUSG00000104847	predicted gene 43177 [Source:MGI Symbol;Acc:MGI:5663314]	7	0	0.333333	0	2		#DIV/0!	#DIV/0!	0.0368685
Sod3	5	52363791	52371418	+		Sod3	ENSMUSG00000072941	superoxide dismutase 3, extracellular [Source:MGI Symbol;Acc:MGI:103181]	240.333	5.66667	70.3333	126	129		42.4118	5.40639	1.4508e-22
Sepsecs	5	52640087	52669708	-		Sepsecs	ENSMUSG00000029173	Sep (O-phosphoserine) tRNA:Sec (selenocysteine) tRNA synthase [Source:MGI Symbol;Acc:MGI:1098791]	772.667	448.333	804.333	509.333	1044		1.72342	0.785274	0.00121483
Pcdh7	5	57717967	58133230	+		4932441J04Rik	ENSMUSG00000097216	RIKEN cDNA 4932441J04 gene [Source:MGI Symbol;Acc:MGI:2441691]	0.333333	30.3333	2.66667	4.33333	1.33333		0.010989	-6.50779	0.00332829
C230096K16Rik	5	64804014	64805735	+		Gm20033	ENSMUSG00000097640	predicted gene, 20033 [Source:MGI Symbol;Acc:MGI:5012218]	17	59.3333	17.6667	21.6667	33		0.286517	-1.80331	0.00347686
Tlr6	5	64952031	64960097	-		Tlr6	ENSMUSG00000051498	toll-like receptor 6 [Source:MGI Symbol;Acc:MGI:1341296]	419	247	315	490.333	378.667		1.69636	0.762439	0.000215218
Fam114a1	5	64970071	65041886	+		Fam114a1	ENSMUSG00000029185	family with sequence similarity 114, member A1 [Source:MGI Symbol;Acc:MGI:1915553]	288	135.333	114.667	266	232		2.12808	1.08955	0.000252129
Tmem156	5	65054346	65092132	-		Tmem156	ENSMUSG00000037913	transmembrane protein 156 [Source:MGI Symbol;Acc:MGI:2685292]	244.667	394	215	207.667	294		0.620981	-0.687378	0.0208898
Wdr19	5	65199696	65260415	+		Wdr19	ENSMUSG00000037890	WD repeat domain 19 [Source:MGI Symbol;Acc:MGI:2443231]	166.333	47	132.667	119	99		3.53901	1.82334	1.90792e-05
N4bp2	5	65763521	65830108	+		N4bp2os	ENSMUSG00000106978	NEDD4 binding protein 2, opposite strand [Source:MGI Symbol;Acc:MGI:1921484]	1798.67	1230	2632.67	2495.67	3275		1.46233	0.548269	0.00906407
Apbb2	5	66298703	66618784	-		Apbb2	ENSMUSG00000029207	amyloid beta (A4) precursor protein-binding, family B, member 2 [Source:MGI Symbol;Acc:MGI:108405]	50.3333	14.6667	13.6667	15.6667	19.3333		3.43182	1.77897	0.0126737
Bend4	5	67392147	67428310	-		Bend4	ENSMUSG00000092060	BEN domain containing 4 [Source:MGI Symbol;Acc:MGI:3648414]	991.667	350	234.667	314.333	613.667		2.83333	1.5025	0.00193512
Atp8a1	5	67618140	67847434	-		Shisa3	ENSMUSG00000050010	shisa family member 3 [Source:MGI Symbol;Acc:MGI:3041225]	1255.67	1749	1737	1265.33	2192		0.717934	-0.478077	0.0118785
Gabra4	5	71569749	71658308	-		Gabra4	ENSMUSG00000029211	gamma-aminobutyric acid (GABA) A receptor, subunit alpha 4 [Source:MGI Symbol;Acc:MGI:95616]	0	11.3333	2.33333	0	0.666667		0	#NUM!	0.01969
Cnga1	5	72603696	72644275	-		Cnga1	ENSMUSG00000067220	cyclic nucleotide gated channel alpha 1 [Source:MGI Symbol;Acc:MGI:88436]	10.6667	46.3333	4	10	57.6667		0.230216	-2.11894	0.0121226
Txk	5	72695978	72752777	-		Txk	ENSMUSG00000054892	TXK tyrosine kinase [Source:MGI Symbol;Acc:MGI:102960]	161	743.333	301	139	250.333		0.216592	-2.20695	1.63265e-26
Rasl11b	5	74195286	74199481	+		Rasl11b	ENSMUSG00000049907	RAS-like, family 11, member B [Source:MGI Symbol;Acc:MGI:1916189]	10	41	18.6667	12.6667	27.6667		0.243902	-2.03562	0.00196185
Scfd2	5	74204816	74531759	-		Scfd2	ENSMUSG00000062110	Sec1 family domain containing 2 [Source:MGI Symbol;Acc:MGI:2443446]	185.667	291.667	241.667	174	191.667		0.636571	-0.651606	0.00643792
Chic2	5	74997988	75044774	-		Chic2	ENSMUSG00000029229	cysteine-rich hydrophobic domain 2 [Source:MGI Symbol;Acc:MGI:1921527]	424.667	745.333	920.667	809.667	989		0.569767	-0.811555	7.73225e-07
Kit	5	75574916	75656722	+		Kit	ENSMUSG00000005672	KIT proto-oncogene receptor tyrosine kinase [Source:MGI Symbol;Acc:MGI:96677]	2617	1363.67	1101.67	2040.33	3848.33		1.91909	0.940423	0.00151664
Gm19590	5	75833035	75835645	-		Gm19590	ENSMUSG00000107061	predicted gene, 19590 [Source:MGI Symbol;Acc:MGI:5011775]	11.3333	78.3333	7.66667	8.66667	28		0.144681	-2.78905	2.18952e-05
A730089K16Rik	5	76655929	76658355	-		A730089K16Rik	ENSMUSG00000103529	RIKEN cDNA A730089K16 gene [Source:MGI Symbol;Acc:MGI:2443970]	0	43.6667	0.333333	0.333333	0		0	#NUM!	9.7115e-05
C530008M17Rik	5	76656512	76873554	+		A730089K16Rik	ENSMUSG00000103529	RIKEN cDNA A730089K16 gene [Source:MGI Symbol;Acc:MGI:2443970]	7	80.6667	9	9	10.6667		0.0867769	-3.52655	0.00276224
Noa1	5	77294182	77310084	-		Noa1	ENSMUSG00000036285	nitric oxide associated 1 [Source:MGI Symbol;Acc:MGI:1914306]	281.333	457.667	481.333	427.667	444		0.614712	-0.702017	0.000672171
Adgrl3	5	81020138	81825133	+		Adgrl3	ENSMUSG00000037605	adhesion G protein-coupled receptor L3 [Source:MGI Symbol;Acc:MGI:2441950]	18.3333	348.667	1.66667	0.333333	4		0.0525813	-4.24931	9.10814e-28
Gm16054	5	81791909	81798426	-		Adgrl3	ENSMUSG00000037605	adhesion G protein-coupled receptor L3 [Source:MGI Symbol;Acc:MGI:2441950]	1.66667	45.6667	0	0	0		0.0364963	-4.7761	2.87767e-07
Rufy3	5	88565040	88651392	+		Rufy3	ENSMUSG00000029291	RUN and FYVE domain containing 3 [Source:MGI Symbol;Acc:MGI:106484]	1021	578.667	1082	1050.33	1231		1.7644	0.819178	0.000476248
Ppbp	5	90768518	90770063	+		Ppbp	ENSMUSG00000029372	pro-platelet basic protein [Source:MGI Symbol;Acc:MGI:1888712]	72.3333	12.3333	20.3333	140.333	44		5.86487	2.5521	3.86856e-06
Pf4	5	90772435	90773383	+		Pf4	ENSMUSG00000029373	platelet factor 4 [Source:MGI Symbol;Acc:MGI:1888711]	169.667	6	164.333	756	183		28.2778	4.8216	1.05133e-20
Cxcl3	5	90786103	90789600	+		Cxcl3	ENSMUSG00000029379	chemokine (C-X-C motif) ligand 3 [Source:MGI Symbol;Acc:MGI:3037818]	178.667	2	87.6667	266	73.3333		89.3333	6.48113	9.1303e-18
Cxcl1	5	90891241	90893115	+		Cxcl1	ENSMUSG00000029380	chemokine (C-X-C motif) ligand 1 [Source:MGI Symbol;Acc:MGI:108068]	48	8	20.3333	51.6667	21		6	2.58496	0.0116473
Areg	5	91139599	91148432	+		Areg	ENSMUSG00000029378	amphiregulin [Source:MGI Symbol;Acc:MGI:88068]	109.333	20	34.3333	69.6667	5.66667		5.46667	2.45066	1.16669e-06
Ppef2	5	92226679	92256278	-		Ppef2	ENSMUSG00000029410	protein phosphatase, EF hand calcium-binding domain 2 [Source:MGI Symbol;Acc:MGI:1342304]	9.66667	41.3333	5.66667	8	10		0.233871	-2.09622	0.000747907
Naaa	5	92257659	92278170	-		Naaa	ENSMUSG00000029413	N-acylethanolamine acid amidase [Source:MGI Symbol;Acc:MGI:1914361]	341	902.333	1353	900.333	736.667		0.377909	-1.40389	1.614e-05
Sdad1	5	92284010	92310479	-		Sdad1	ENSMUSG00000029415	SDA1 domain containing 1 [Source:MGI Symbol;Acc:MGI:2140779]	707.333	1159	1148	692	1264.67		0.610296	-0.712418	0.000914286
Cxcl9	5	92321347	92328079	-		Cxcl9	ENSMUSG00000029417	chemokine (C-X-C motif) ligand 9 [Source:MGI Symbol;Acc:MGI:1352449]	5	481.333	183.667	29.6667	46.6667		0.0103878	-6.58896	2.63291e-29
Cxcl10	5	92346638	92348889	-		Art3	ENSMUSG00000034842	ADP-ribosyltransferase 3 [Source:MGI Symbol;Acc:MGI:1202729]	82.3333	202.667	777	357	262.333		0.40625	-1.29956	0.000458802
Stbd1	5	92603041	92606579	+		Stbd1	ENSMUSG00000047963	starch binding domain 1 [Source:MGI Symbol;Acc:MGI:1261768]	157	62	158.333	160.333	129.333		2.53226	1.34042	0.00591505
Sept11	5	93093437	93176447	+		Sept11	ENSMUSG00000058013	septin 11 [Source:MGI Symbol;Acc:MGI:1277214]	1025.33	1832.33	1881.33	1448.67	2313.33		0.559578	-0.837589	0.00220749
Gm43682	5	93176970	93179059	+		Gm43682	ENSMUSG00000107019	predicted gene 43682 [Source:MGI Symbol;Acc:MGI:5663819]	19.6667	69.3333	19.6667	25.6667	21		0.283654	-1.8178	0.00617278
Cxcl13	5	95956951	95961068	+		Cxcl13	ENSMUSG00000023078	chemokine (C-X-C motif) ligand 13 [Source:MGI Symbol;Acc:MGI:1888499]	0	14.6667	0.666667	0	0.333333		0	#NUM!	0.000692453
Fras1	5	96373955	96784728	+		Fras1	ENSMUSG00000034687	Fraser extracellular matrix complex subunit 1 [Source:MGI Symbol;Acc:MGI:2385368]	209.333	3.33333	99.3333	96	15.6667		62.8	5.97269	2.91964e-06
Anxa3	5	96793339	96845966	+		Anxa3	ENSMUSG00000029484	annexin A3 [Source:MGI Symbol;Acc:MGI:1201378]	1314.33	341.667	2045	2764.67	4655.33		3.84683	1.94367	5.97734e-23
Gm42601	5	96879342	96891172	+		Gm42601	ENSMUSG00000106319	predicted gene 42601 [Source:MGI Symbol;Acc:MGI:5662738]	89.6667	6	22	14.3333	71.6667		14.9444	3.90154	0.000109505
Gm42602	5	96879518	96882741	+		Gm42601	ENSMUSG00000106319	predicted gene 42601 [Source:MGI Symbol;Acc:MGI:5662738]	82	3.66667	13.3333	6.33333	63		22.3636	4.48308	8.98175e-06
Bmp2k	5	96997689	97091867	+		Bmp2k	ENSMUSG00000034663	BMP2 inducible kinase [Source:MGI Symbol;Acc:MGI:2155456]	2837.33	1870.67	3921.67	3583.33	6737		1.51675	0.600983	0.0280366
Paqr3	5	97082329	97111596	-		Bmp2k	ENSMUSG00000034663	BMP2 inducible kinase [Source:MGI Symbol;Acc:MGI:2155456]	593.333	305	708.667	622.333	1254.67		1.94536	0.960034	0.00413034
Prdm8	5	98167198	98188991	+		Prdm8	ENSMUSG00000035456	PR domain containing 8 [Source:MGI Symbol;Acc:MGI:1924880]	57	4	13	41	40.6667		14.25	3.83289	4.63013e-05
A730035I17Rik	5	98183121	98185984	-		Prdm8	ENSMUSG00000035456	PR domain containing 8 [Source:MGI Symbol;Acc:MGI:1924880]	30	3.33333	5.33333	13	19.6667		9	3.16993	0.0179003
Rasgef1b	5	99217426	99729065	-		Rasgef1b	ENSMUSG00000089809	RasGEF domain family, member 1B [Source:MGI Symbol;Acc:MGI:2443755]	836.333	1562	1740	1738.67	1990.33		0.535425	-0.901245	0.0205271
Tmem150c	5	100077872	100159808	-		Tmem150c	ENSMUSG00000050640	transmembrane protein 150C [Source:MGI Symbol;Acc:MGI:3041258]	885.333	79.6667	998	773.333	1076		11.113	3.47417	4.19262e-30
Tmem150cos	5	100077962	100095273	+		Tmem150c	ENSMUSG00000050640	transmembrane protein 150C [Source:MGI Symbol;Acc:MGI:3041258]	52.3333	7	65	60	75.3333		7.47619	2.9023	6.01059e-06
Wdfy3	5	101832956	102069921	-		Wdfy3	ENSMUSG00000043940	WD repeat and FYVE domain containing 3 [Source:MGI Symbol;Acc:MGI:1096875]	1296.33	645	459.333	668.333	1248.33		2.00982	1.00707	0.00359254
Arhgap24	5	102481391	102897937	+		1700013M08Rik	ENSMUSG00000106586	RIKEN cDNA 1700013M08 gene [Source:MGI Symbol;Acc:MGI:1922755]	601.667	203.333	1483.33	1359.67	452.667		2.95902	1.56512	2.53557e-11
Ptpn13	5	103425192	103598303	+		Ptpn13	ENSMUSG00000034573	protein tyrosine phosphatase, non-receptor type 13 [Source:MGI Symbol;Acc:MGI:103293]	22.3333	77.3333	53.3333	31.3333	23		0.288793	-1.79189	6.52641e-05
Pkd2	5	104459450	104505819	+		Pkd2	ENSMUSG00000034462	polycystic kidney disease 2 [Source:MGI Symbol;Acc:MGI:1099818]	185	52	46.3333	41.6667	93.3333		3.55769	1.83094	8.28617e-05
Zfp951	5	104813169	104860070	-		Zfp951	ENSMUSG00000072774	zinc finger protein 951 [Source:MGI Symbol;Acc:MGI:2441896]	174.333	277	128.667	129.333	181.333		0.629362	-0.668038	0.0244393
Abcg3	5	104935057	104982718	-		Abcg3	ENSMUSG00000029299	ATP-binding cassette, sub-family G (WHITE), member 3 [Source:MGI Symbol;Acc:MGI:1351624]	545.667	1619.33	340.333	348.333	463.333		0.33697	-1.56931	7.2086e-07
Gbp8	5	105014150	105139540	-		Gbp8	ENSMUSG00000034438	guanylate-binding protein 8 [Source:MGI Symbol;Acc:MGI:1923324]	477.667	763.333	356.667	473.333	799.667		0.625764	-0.676309	0.0223074
4930428O21Rik	5	107698212	107703480	-		4930428O21Rik	ENSMUSG00000106333	RIKEN cDNA 4930428O21 gene [Source:MGI Symbol;Acc:MGI:1923034]	0.666667	13.3333	0	2.33333	0.666667		0.05	-4.32193	0.0187521
Gfi1	5	107716657	107726036	-		Gfi1	ENSMUSG00000029275	growth factor independent 1 [Source:MGI Symbol;Acc:MGI:103170]	105	296.667	182.667	161.667	161.333		0.353933	-1.49845	2.52393e-06
Fam69a	5	107908053	107987085	-		Rpl5	ENSMUSG00000058558	ribosomal protein L5 [Source:MGI Symbol;Acc:MGI:102854]	681.333	1032.33	1110.67	971.667	1271		0.659993	-0.599476	0.00692351
Idua	5	108660331	108684557	+		Dgkq	ENSMUSG00000004815	diacylglycerol kinase, theta [Source:MGI Symbol;Acc:MGI:102918]	651.667	423.667	735.333	744	1123		1.53816	0.621205	0.00618914
Pxmp2	5	110274282	110286186	-		Gm15788	ENSMUSG00000087439	predicted gene 15788 [Source:MGI Symbol;Acc:MGI:3783230]	92.3333	27	130.667	117.667	76.3333		3.41975	1.77389	0.000328195
Pole	5	110286306	110337474	+		Pole	ENSMUSG00000007080	polymerase (DNA directed), epsilon [Source:MGI Symbol;Acc:MGI:1196391]	561.333	320.333	631	354.667	393		1.75234	0.809284	0.000768556
Fbrsl1	5	110361754	110448503	-		Fbrsl1	ENSMUSG00000043323	fibrosin-like 1 [Source:MGI Symbol;Acc:MGI:1920907]	1428.67	913	1557.33	2007	3141		1.5648	0.645983	0.0168357
Gm26711	5	110385835	110388073	+		Fbrsl1	ENSMUSG00000043323	fibrosin-like 1 [Source:MGI Symbol;Acc:MGI:1920907]	65.3333	21.3333	33	54	82		3.0625	1.61471	0.0187521
Ttc28	5	110879803	111289780	+		Ttc28	ENSMUSG00000033209	tetratricopeptide repeat domain 28 [Source:MGI Symbol;Acc:MGI:2140873]	370.333	215	579.333	562	469		1.72248	0.784488	0.000495016
Miat	5	112213228	112229395	-		Miat	ENSMUSG00000097767	myocardial infarction associated transcript (non-protein coding) [Source:MGI Symbol;Acc:MGI:2444886]	0	14.6667	0	0	1.33333		0	#NUM!	0.00986798
Asphd2	5	112384354	112394866	-		Asphd2	ENSMUSG00000029348	aspartate beta-hydroxylase domain containing 2 [Source:MGI Symbol;Acc:MGI:1920148]	121	4	9.33333	49	57		30.25	4.91886	6.6764e-06
Sez6l	5	112419151	112577185	-		Sez6l	ENSMUSG00000058153	seizure related 6 homolog like [Source:MGI Symbol;Acc:MGI:1935121]	268	29.3333	20.6667	105.333	143.667		9.13636	3.19162	2.41805e-08
Myo18b	5	112688876	112896362	-		Myo18b	ENSMUSG00000072720	myosin XVIIIb [Source:MGI Symbol;Acc:MGI:1921626]	176.667	19.3333	98.6667	198	214		9.13793	3.19187	2.16133e-11
Grk3	5	112910482	113015791	-		Grk3	ENSMUSG00000042249	G protein-coupled receptor kinase 3 [Source:MGI Symbol;Acc:MGI:87941]	3113.67	2020.33	2642.33	2855.33	5061.67		1.54116	0.624021	0.00360692
2900026A02Rik	5	113086323	113221236	-		2900026A02Rik	ENSMUSG00000051339	RIKEN cDNA 2900026A02 gene [Source:MGI Symbol;Acc:MGI:1920194]	185	598.333	173	140.667	132.667		0.309192	-1.69342	0.036743
Wscd2	5	113490333	113589725	+		Wscd2	ENSMUSG00000063430	WSC domain containing 2 [Source:MGI Symbol;Acc:MGI:2445030]	1.66667	42	28.6667	19.6667	13.3333		0.0396825	-4.65535	4.28763e-06
Iscu	5	113772748	113778288	+		Iscu	ENSMUSG00000025825	iron-sulfur cluster assembly enzyme [Source:MGI Symbol;Acc:MGI:1913633]	483	305	1907.67	1889.33	1637.67		1.58361	0.663214	0.00110869
Tmem119	5	113793729	113800516	-		Tmem119	ENSMUSG00000054675	transmembrane protein 119 [Source:MGI Symbol;Acc:MGI:2385228]	59	15.3333	3.33333	19	30		3.84783	1.94404	0.00426904
Ssh1	5	113937094	113993894	-		Ssh1	ENSMUSG00000042121	slingshot homolog 1 (Drosophila) [Source:MGI Symbol;Acc:MGI:2686240]	2579.67	1087.33	2878.67	3301.33	3669.33		2.37247	1.24639	4.96711e-13
Dao	5	114003703	114025682	+		Dao	ENSMUSG00000042096	D-amino acid oxidase [Source:MGI Symbol;Acc:MGI:94859]	138.667	10.6667	29.6667	62.6667	105.333		13	3.70044	1.60159e-10
Mvk	5	114444269	114460591	+		Mvk	ENSMUSG00000041939	mevalonate kinase [Source:MGI Symbol;Acc:MGI:107624]	235.667	121.667	476.333	566	437		1.93699	0.953814	0.0305795
Trpv4	5	114622152	114658421	-		Trpv4	ENSMUSG00000014158	transient receptor potential cation channel, subfamily V, member 4 [Source:MGI Symbol;Acc:MGI:1926945]	124.667	51.3333	61.3333	37	88.3333		2.42857	1.28011	0.0265979
Oasl2	5	114896936	114912234	+		Oasl2	ENSMUSG00000029561	2'-5' oligoadenylate synthetase-like 2 [Source:MGI Symbol;Acc:MGI:1344390]	914.667	413.667	3977	5293.33	1650.67		2.21112	1.14478	0.0070475
Oasl1	5	114923240	114937915	+		Gm13822	ENSMUSG00000087477	predicted gene 13822 [Source:MGI Symbol;Acc:MGI:3650351]	609.333	247	3138.67	2728.33	1256.33		2.46694	1.30272	4.51504e-07
Unc119b	5	115122550	115134975	-		Unc119b	ENSMUSG00000046562	unc-119 lipid binding chaperone B [Source:MGI Symbol;Acc:MGI:2147162]	647	1134	2987.33	1238	2138.67		0.570547	-0.809583	1.47449e-05
Bicdl1	5	115648175	115731621	-		Bicdl1	ENSMUSG00000041609	BICD family like cargo adaptor 1 [Source:MGI Symbol;Acc:MGI:1922915]	141.667	340.667	448.667	289	313.667		0.415851	-1.26586	4.01859e-05
Vsig10	5	117319083	117355005	+		Gm10399	ENSMUSG00000072688	predicted gene 10399 [Source:MGI Symbol;Acc:MGI:3704255]	786.667	210	536	867.333	1193.33		3.74603	1.90536	6.31029e-10
Ksr2	5	117414000	117775003	+		Ksr2	ENSMUSG00000061578	kinase suppressor of ras 2 [Source:MGI Symbol;Acc:MGI:3610315]	182.333	71	63.6667	46.6667	79.3333		2.56808	1.36069	0.000149735
Nos1	5	117781032	117958840	+		Nos1	ENSMUSG00000029361	nitric oxide synthase 1, neuronal [Source:MGI Symbol;Acc:MGI:97360]	147	44.6667	2.66667	8.66667	23.6667		3.29104	1.71855	0.00529023
Tesc	5	118027743	118061878	+		Tesc	ENSMUSG00000029359	tescalcin [Source:MGI Symbol;Acc:MGI:1930803]	19.6667	77.3333	19	38	47.6667		0.25431	-1.97534	0.00135438
Rnft2	5	118190736	118245116	-		Rnft2	ENSMUSG00000032850	ring finger protein, transmembrane 2 [Source:MGI Symbol;Acc:MGI:2442859]	37.3333	10.6667	23	24	13.6667		3.5	1.80735	0.0262506
Plbd2	5	120483282	120503625	-		Sds	ENSMUSG00000029597	serine dehydratase [Source:MGI Symbol;Acc:MGI:98270]	1059	704	2090.33	1608.33	1864.33		1.50426	0.589055	0.019296
Dtx1	5	120680202	120711927	-		Dtx1	ENSMUSG00000029603	deltex 1, E3 ubiquitin ligase [Source:MGI Symbol;Acc:MGI:1352744]	1106	1586.33	6845.33	7779.67	2038.33		0.697205	-0.520345	0.00364242
Oas1g	5	120876142	120887613	-		Oas1g	ENSMUSG00000066861	2'-5' oligoadenylate synthetase 1G [Source:MGI Symbol;Acc:MGI:97429]	115.333	29.3333	195	303.667	85		3.93182	1.9752	0.00389167
Acad12	5	121596775	121618938	-		Acad12	ENSMUSG00000042647	acyl-Coenzyme A dehydrogenase family, member 12 [Source:MGI Symbol;Acc:MGI:2443320]	174	87	212	215.333	178		2	1	0.00228804
P2rx4	5	122707544	122729738	+		P2rx4	ENSMUSG00000029470	purinergic receptor P2X, ligand-gated ion channel 4 [Source:MGI Symbol;Acc:MGI:1338859]	1180.67	733.667	3340.33	2070.67	2927.67		1.60927	0.686405	0.000396908
Camkk2	5	122731170	122779409	-		Camkk2	ENSMUSG00000029471	calcium/calmodulin-dependent protein kinase kinase 2, beta [Source:MGI Symbol;Acc:MGI:2444812]	975	583	1134.67	1145	1430.67		1.67238	0.741906	5.50304e-05
AI480526	5	123133723	123141666	-		Gm26745	ENSMUSG00000097213	predicted gene, 26745 [Source:MGI Symbol;Acc:MGI:5477239]	814	296.667	594.667	618.667	1235.33		2.74382	1.45619	2.92714e-07
Gm38102	5	123133939	123137695	+		Gm26745	ENSMUSG00000097213	predicted gene, 26745 [Source:MGI Symbol;Acc:MGI:5477239]	340	111.667	231.667	224	475.333		3.04478	1.60634	0.000102039
4932422M17Rik	5	123138931	123141569	+		Gm26745	ENSMUSG00000097213	predicted gene, 26745 [Source:MGI Symbol;Acc:MGI:5477239]	366.333	133.667	234.667	240.667	465		2.74065	1.45452	6.39754e-08
Clip1	5	123577795	123684618	-		Clip1	ENSMUSG00000049550	CAP-GLY domain containing linker protein 1 [Source:MGI Symbol;Acc:MGI:1928401]	1742	1294.33	1986.33	1919	2119.67		1.34587	0.428535	0.0453465
Hcar2	5	123863570	123865499	-		Hcar2	ENSMUSG00000045502	hydroxycarboxylic acid receptor 2 [Source:MGI Symbol;Acc:MGI:1933383]	286	772.667	854.333	2584.33	321.333		0.370147	-1.43383	4.40484e-12
Atp6v0a2	5	124628576	124724455	+		Atp6v0a2	ENSMUSG00000038023	ATPase, H+ transporting, lysosomal V0 subunit A2 [Source:MGI Symbol;Acc:MGI:104855]	1063.67	1453	1549.33	1159	1795		0.732049	-0.449989	0.00607132
Ccdc92	5	124834418	124862424	-		Ccdc92	ENSMUSG00000037979	coiled-coil domain containing 92 [Source:MGI Symbol;Acc:MGI:106485]	35	110	80	63.3333	57.6667		0.318182	-1.65208	0.00737009
Glt1d1	5	127632262	127709374	+		Slc15a4	ENSMUSG00000029416	solute carrier family 15, member 4 [Source:MGI Symbol;Acc:MGI:2140796]	3.33333	48.3333	8	4	4.66667		0.0689655	-3.85798	0.00215811
Zfp11	5	129654593	129670099	-		Zfp11	ENSMUSG00000051034	zinc finger protein 11 [Source:MGI Symbol;Acc:MGI:99156]	109.333	46	70	56.3333	66.6667		2.37681	1.24903	0.00816154
Psph	5	129765558	129787449	-		Psph	ENSMUSG00000029446	phosphoserine phosphatase [Source:MGI Symbol;Acc:MGI:97788]	186	277.667	365.667	271	304		0.669868	-0.578051	0.0299512
Asl	5	130011258	130029247	-		Asl	ENSMUSG00000025533	argininosuccinate lyase [Source:MGI Symbol;Acc:MGI:88084]	605.333	332.667	961.667	1215.33	1166.33		1.81964	0.863652	8.17671e-07
Gatsl2	5	134099711	134144343	+		Gatsl2	ENSMUSG00000015944	GATS protein-like 2 [Source:MGI Symbol;Acc:MGI:1933384]	1581.67	358.333	2781.67	1528.33	2235		4.41395	2.14207	2.90889e-08
Gtf2ird2	5	134184019	134224355	+		Gtf2ird2	ENSMUSG00000015942	GTF2I repeat domain containing 2 [Source:MGI Symbol;Acc:MGI:2149780]	821	486.333	1862.67	2437.67	1976		1.68814	0.755437	0.000172032
Ncf1	5	134220053	134229625	-		Gtf2ird2	ENSMUSG00000015942	GTF2I repeat domain containing 2 [Source:MGI Symbol;Acc:MGI:2149780]	2933.67	1530.67	12976	18448	12931		1.91659	0.938545	0.000105992
Clip2	5	134489383	134552434	-		Clip2	ENSMUSG00000063146	CAP-GLY domain containing linker protein 2 [Source:MGI Symbol;Acc:MGI:1313136]	915.333	393.333	1337.67	1892	1310.33		2.32712	1.21854	1.92891e-06
Cldn13	5	134914249	134915526	-		Cldn13	ENSMUSG00000008843	claudin 13 [Source:MGI Symbol;Acc:MGI:1913102]	24.6667	131.667	30.6667	56.3333	8		0.187342	-2.41626	0.0353034
Ccl24	5	135569937	135573049	-		Ccl24	ENSMUSG00000004814	chemokine (C-C motif) ligand 24 [Source:MGI Symbol;Acc:MGI:1928953]	12.3333	98.3333	19.3333	2.33333	6.66667		0.125424	-2.99512	1.9191e-08
Orai2	5	136147459	136170713	-		Orai2	ENSMUSG00000039747	ORAI calcium release-activated calcium modulator 2 [Source:MGI Symbol;Acc:MGI:2443195]	702.333	966.333	1005	1704.67	2087.33		0.726802	-0.460365	0.00494988
Cux1	5	136248135	136567490	-		Cux1	ENSMUSG00000029705	cut-like homeobox 1 [Source:MGI Symbol;Acc:MGI:88568]	2250	1132.33	3138.67	2735	2630.67		1.98705	0.990626	7.2341e-09
4933404O12Rik	5	136919146	136937112	+		4933404O12Rik	ENSMUSG00000097908	RIKEN cDNA 4933404O12 gene [Source:MGI Symbol;Acc:MGI:1914002]	176	71.6667	183.333	119.333	143.333		2.45581	1.2962	0.00937566
Ache	5	137287519	137294466	+		Gm42456	ENSMUSG00000105736	predicted gene 42456 [Source:MGI Symbol;Acc:MGI:5662593]	5	57	5	28.3333	5		0.0877193	-3.51096	0.000404944
Tfr2	5	137569840	137587481	+		Tfr2	ENSMUSG00000029716	transferrin receptor 2 [Source:MGI Symbol;Acc:MGI:1354956]	10.6667	69	20.6667	11.6667	7.33333		0.154589	-2.69349	0.00742129
Irs3	5	137643031	137645714	-		Irs3	ENSMUSG00000047182	insulin receptor substrate 3 [Source:MGI Symbol;Acc:MGI:1194882]	21	1.66667	2.33333	5.33333	9.33333		12.6	3.65535	0.00158321
Pilrb1	5	137852147	137858106	-		Pilrb1	ENSMUSG00000066684	paired immunoglobin-like type 2 receptor beta 1 [Source:MGI Symbol;Acc:MGI:2450532]	204.333	432	234.667	420	124.667		0.472994	-1.08011	0.000177297
Gm36551	5	137857045	137860318	+		Pilrb1	ENSMUSG00000066684	paired immunoglobin-like type 2 receptor beta 1 [Source:MGI Symbol;Acc:MGI:2450532]	17.6667	43.6667	29	38.6667	11.6667		0.40458	-1.3055	0.0289681
Pilrb2	5	137865827	137871815	-		Pilrb2	ENSMUSG00000066682	paired immunoglobin-like type 2 receptor beta 2 [Source:MGI Symbol;Acc:MGI:2450535]	241	415.667	106.333	497.333	120.333		0.579792	-0.786394	0.0203941
Nxpe5	5	138225898	138253363	+		Nxpe5	ENSMUSG00000047592	neurexophilin and PC-esterase domain family, member 5 [Source:MGI Symbol;Acc:MGI:3584036]	312	114	53.3333	63.6667	73.6667		2.73684	1.45251	0.0138537
Pvrig	5	138341961	138343557	+		Pvrig	ENSMUSG00000109713	poliovirus receptor related immunoglobulin domain containing [Source:MGI Symbol;Acc:MGI:5596028]	42.3333	113	11.6667	6.66667	22.3333		0.374631	-1.41646	0.00176227
Zfp68	5	138603652	138619761	-		Zfp68	ENSMUSG00000058291	zinc finger protein 68 [Source:MGI Symbol;Acc:MGI:1344427]	659.333	931.333	874.333	783.667	1054		0.707946	-0.49829	0.00193451
Fam20c	5	138754514	138810077	+		Fam20c	ENSMUSG00000025854	family with sequence similarity 20, member C [Source:MGI Symbol;Acc:MGI:2136853]	390.667	67.3333	630	1484	546.333		5.80198	2.53655	8.74946e-05
Sun1	5	139200637	139249840	+		Sun1	ENSMUSG00000036817	Sad1 and UNC84 domain containing 1 [Source:MGI Symbol;Acc:MGI:1924303]	565.667	756.333	810.333	653.333	1049		0.747907	-0.41907	0.0244393
Adap1	5	139271876	139325622	-		Adap1	ENSMUSG00000056413	ArfGAP with dual PH domains 1 [Source:MGI Symbol;Acc:MGI:2442201]	1086.33	593.333	1990.33	2989.67	3356.33		1.8309	0.872552	2.41533e-08
C130050O18Rik	5	139405280	139415623	+		3110082I17Rik	ENSMUSG00000053553	RIKEN cDNA 3110082I17 gene [Source:MGI Symbol;Acc:MGI:1920462]	302.667	184	80.6667	88	156.333		1.64493	0.718024	0.0415667
Mafk	5	139791513	139802653	+		Mafk	ENSMUSG00000018143	v-maf musculoaponeurotic fibrosarcoma oncogene family, protein K (avian) [Source:MGI Symbol;Acc:MGI:99951]	496.667	1045	1215.67	995.667	1280		0.475279	-1.07315	7.72488e-08
Tmem184a	5	139802485	139819917	-		Mafk	ENSMUSG00000018143	v-maf musculoaponeurotic fibrosarcoma oncogene family, protein K (avian) [Source:MGI Symbol;Acc:MGI:99951]	26	56.3333	52	69.3333	61.3333		0.461538	-1.11548	0.0430971
Elfn1	5	139907943	139974722	+		Elfn1	ENSMUSG00000048988	leucine rich repeat and fibronectin type III, extracellular 1 [Source:MGI Symbol;Acc:MGI:2442479]	9.66667	0.333333	0.666667	0.666667	0		29	4.85798	0.0177708
Ttyh3	5	140620578	140649031	-		Ttyh3	ENSMUSG00000036565	tweety family member 3 [Source:MGI Symbol;Acc:MGI:1925589]	2231.67	1247	3705.33	6254.33	7480.33		1.78963	0.83966	3.11796e-07
Card11	5	140872990	141000582	-		Card11	ENSMUSG00000036526	caspase recruitment domain family, member 11 [Source:MGI Symbol;Acc:MGI:1916978]	749.333	1390.33	3356.67	3273.33	3618.67		0.538959	-0.891751	1.1161e-06
Ap5z1	5	142463944	142478710	+		Ap5z1	ENSMUSG00000039623	adaptor-related protein complex 5, zeta 1 subunit [Source:MGI Symbol;Acc:MGI:1924908]	755.333	502.667	961.333	1050.67	1566		1.50265	0.587511	0.0353502
Radil	5	142484839	142551098	-		Radil	ENSMUSG00000029576	Ras association and DIL domains [Source:MGI Symbol;Acc:MGI:2443088]	71.3333	5	13	43.3333	14		14.2667	3.83458	1.56252e-06
Fbxl18	5	142866946	142895421	-		Fbxl18	ENSMUSG00000066640	F-box and leucine-rich repeat protein 18 [Source:MGI Symbol;Acc:MGI:2444450]	545.667	212	423	470.333	658.667		2.5739	1.36396	4.11553e-05
Fscn1	5	142960343	142973185	+		Fscn1	ENSMUSG00000029581	fascin actin-bundling protein 1 [Source:MGI Symbol;Acc:MGI:1352745]	2755.67	615.333	19894.7	30793	24466		4.47833	2.16296	0
E130309D02Rik	5	143301195	143315360	-		E130309D02Rik	ENSMUSG00000039244	RIKEN cDNA E130309D02 gene [Source:MGI Symbol;Acc:MGI:2442621]	377	523	856.333	808	912.333		0.720841	-0.472246	0.0465275
Fam220a	5	143548706	143564531	+		Fam220a	ENSMUSG00000083012	family with sequence similarity 220, member A [Source:MGI Symbol;Acc:MGI:1914488]	305.333	437	683.667	796	420.333		0.698703	-0.517248	0.0144145
D130017N08Rik	5	143758354	143768575	+		D130017N08Rik	ENSMUSG00000097287	RIKEN cDNA D130017N08 gene [Source:MGI Symbol;Acc:MGI:2443273]	94.3333	37.6667	88.6667	80	85		2.50442	1.32448	0.0303245
Gm15708	5	144277061	144280513	+		Bri3	ENSMUSG00000047843	brain protein I3 [Source:MGI Symbol;Acc:MGI:1933174]	35	67.6667	20.3333	32.6667	63		0.517241	-0.95109	0.0364892
Smurf1	5	144876495	144965847	-		Smurf1	ENSMUSG00000038780	SMAD specific E3 ubiquitin protein ligase 1 [Source:MGI Symbol;Acc:MGI:1923038]	1229.67	681.333	1350.33	1370.67	1905.33		1.80479	0.851835	0.0264648
Flt3	5	147330741	147400489	-		Flt3	ENSMUSG00000042817	FMS-like tyrosine kinase 3 [Source:MGI Symbol;Acc:MGI:95559]	2143	1262.33	1677.33	2830	4143		1.69765	0.763539	7.88883e-06
Slc46a3	5	147878437	147894815	-		Slc46a3	ENSMUSG00000029650	solute carrier family 46, member 3 [Source:MGI Symbol;Acc:MGI:1918956]	499	876	586.667	754	1340		0.569635	-0.811891	0.0118913
Hmgb1	5	149046702	149184489	-		Hmgb1	ENSMUSG00000066551	high mobility group box 1 [Source:MGI Symbol;Acc:MGI:96113]	400	606	2553.67	1875	2339		0.660066	-0.599318	0.0439881
Uspl1	5	149184350	149215434	+		Hmgb1	ENSMUSG00000066551	high mobility group box 1 [Source:MGI Symbol;Acc:MGI:96113]	752	1040	910.667	869.667	1220.67		0.723077	-0.467779	0.0182419
Alox5ap	5	149264767	149288153	+		Alox5ap	ENSMUSG00000060063	arachidonate 5-lipoxygenase activating protein [Source:MGI Symbol;Acc:MGI:107505]	355.667	658.333	1382.33	3139	1036		0.540253	-0.888292	0.00303318
Gm19719	5	149282752	149287868	-		Alox5ap	ENSMUSG00000060063	arachidonate 5-lipoxygenase activating protein [Source:MGI Symbol;Acc:MGI:107505]	91.3333	165	356.667	787.667	272.667		0.553535	-0.853253	0.0173609
Fry	5	150118645	150497753	+		Fry	ENSMUSG00000056602	FRY microtubule binding protein [Source:MGI Symbol;Acc:MGI:2443895]	280.333	402.667	416.333	409.333	714.667		0.696192	-0.522443	0.044651
N4bp2l1	5	150571644	150597188	-		N4bp2l1	ENSMUSG00000041132	NEDD4 binding protein 2-like 1 [Source:MGI Symbol;Acc:MGI:2140872]	1700	1062	2897	3264.33	3268.67		1.60075	0.678751	0.000333774
Stard13	5	151037510	151233836	-		Stard13	ENSMUSG00000016128	StAR-related lipid transfer (START) domain containing 13 [Source:MGI Symbol;Acc:MGI:2385331]	248.333	3.66667	80	61.6667	8		67.7273	6.08166	1.81943e-26
Gm42906	5	151063546	151428163	-		Stard13	ENSMUSG00000016128	StAR-related lipid transfer (START) domain containing 13 [Source:MGI Symbol;Acc:MGI:2385331]	13.6667	0	6.33333	1.33333	0		#DIV/0!	#DIV/0!	0.000500748
Gm43197	6	3336772	3339354	-		Gm20559	ENSMUSG00000106734	predicted gene, 20559 [Source:MGI Symbol;Acc:MGI:5295666]	205	111	164	176.667	351		1.84685	0.885064	0.0139836
Gng11	6	4003904	4008445	+		Gng11	ENSMUSG00000032766	guanine nucleotide binding protein (G protein), gamma 11 [Source:MGI Symbol;Acc:MGI:1913316]	2	17	9.66667	26	6.33333		0.117647	-3.08746	0.00944722
Peg10	6	4747306	4760517	+		Peg10	ENSMUSG00000092035	paternally expressed 10 [Source:MGI Symbol;Acc:MGI:2157785]	285.667	31.3333	3	4.33333	4.66667		9.11702	3.18856	1.89152e-05
Gm44250	6	5216258	5220486	-		Gm44250	ENSMUSG00000107881	predicted gene, 44250 [Source:MGI Symbol;Acc:MGI:5690642]	330.333	133.667	56.6667	59.6667	183		2.47132	1.30528	4.63468e-06
Pon3	6	5220852	5256286	-		Pon3	ENSMUSG00000029759	paraoxonase 3 [Source:MGI Symbol;Acc:MGI:106686]	380	258.333	122.333	130	297		1.47097	0.556766	0.0175544
Tmem168	6	13580687	13608100	-		Tmem168	ENSMUSG00000029569	transmembrane protein 168 [Source:MGI Symbol;Acc:MGI:1921794]	1512.67	919	2672.33	2322.33	2819.33		1.64599	0.718957	0.00619143
Mdfic	6	15720661	15802169	+		Mdfic	ENSMUSG00000041390	MyoD family inhibitor domain containing [Source:MGI Symbol;Acc:MGI:104611]	1140	652	1639.33	1665.67	2344.67		1.74847	0.80609	0.0100393
Gm43990	6	15836089	15837779	+		Gm43990	ENSMUSG00000108048	predicted gene, 43990 [Source:MGI Symbol;Acc:MGI:5690382]	28.6667	4	13	20	12		7.16667	2.8413	0.00667396
Met	6	17463800	17573980	+		Met	ENSMUSG00000009376	met proto-oncogene [Source:MGI Symbol;Acc:MGI:96969]	489.667	218.333	1759.67	811	191.667		2.24275	1.16527	0.000345675
St7	6	17692933	17943025	+		St7	ENSMUSG00000029534	suppression of tumorigenicity 7 [Source:MGI Symbol;Acc:MGI:1927450]	492.333	247.333	257.667	281	207.667		1.99057	0.993179	0.000340596
Gm43844	6	17914996	17920600	+		St7	ENSMUSG00000029534	suppression of tumorigenicity 7 [Source:MGI Symbol;Acc:MGI:1927450]	20	2.66667	0	1.33333	4.66667		7.5	2.90689	0.0163209
Cttnbp2	6	18366478	18514843	-		Cttnbp2	ENSMUSG00000000416	cortactin binding protein 2 [Source:MGI Symbol;Acc:MGI:1353467]	11.6667	0.666667	5.33333	2	1.66667		17.5	4.12928	0.0324034
Ing3	6	21949571	21976038	+		Ing3	ENSMUSG00000029670	inhibitor of growth family, member 3 [Source:MGI Symbol;Acc:MGI:1919027]	432	653	649	545	713.667		0.661562	-0.596052	0.0104897
Gm42547	6	28211008	28214805	-		Gm42547	ENSMUSG00000106990	predicted gene 42547 [Source:MGI Symbol;Acc:MGI:5662684]	276.333	71.3333	240	138.667	246.667		3.87383	1.95376	1.75101e-09
Snd1	6	28475139	28935162	+		Snd1	ENSMUSG00000001424	staphylococcal nuclease and tudor domain containing 1 [Source:MGI Symbol;Acc:MGI:1929266]	1561.33	1144.67	4069	3461.33	4232		1.36401	0.447851	0.0179791
Ahcyl2	6	29768011	29912310	+		Ahcyl2	ENSMUSG00000029772	S-adenosylhomocysteine hydrolase-like 2 [Source:MGI Symbol;Acc:MGI:1921590]	2456.33	1132	3888.67	2294	2437.67		2.16991	1.11763	1.03497e-09
Strip2	6	29917012	29959681	+		Strip2	ENSMUSG00000039629	striatin interacting protein 2 [Source:MGI Symbol;Acc:MGI:2444363]	2565.67	238.333	1846.33	1894.67	3275		10.765	3.42828	8.3e-44
Cpa2	6	30541582	30564476	+		Cpa2	ENSMUSG00000071553	carboxypeptidase A2, pancreatic [Source:MGI Symbol;Acc:MGI:3617840]	29	3.66667	7.33333	11.3333	9		7.90909	2.98351	0.0284783
Mest	6	30723547	30748465	+		Mest	ENSMUSG00000051855	mesoderm specific transcript [Source:MGI Symbol;Acc:MGI:96968]	107.333	51.6667	49.6667	56.6667	58		2.07742	1.05479	0.042284
Tsga13	6	30896981	30915573	-		4930412F09Rik	ENSMUSG00000085321	RIKEN cDNA 4930412F09 gene [Source:MGI Symbol;Acc:MGI:1921177]	2	17.6667	2.33333	2.66667	0		0.113208	-3.14296	0.0297641
Lncpint	6	31093559	31218474	-		Lncpint	ENSMUSG00000044471	long non-protein coding RNA, Trp53 induced transcript [Source:MGI Symbol;Acc:MGI:2673128]	5.66667	28.6667	3	5	5		0.197674	-2.3388	0.0332777
2210408F21Rik	6	31220351	31337404	+		2210408F21Rik	ENSMUSG00000087380	RIKEN cDNA 2210408F21 gene [Source:MGI Symbol;Acc:MGI:1920902]	125	18.6667	74	98.6667	79.6667		6.69643	2.74339	5.61813e-12
Podxl	6	31519488	31563981	-		Podxl	ENSMUSG00000025608	podocalyxin-like [Source:MGI Symbol;Acc:MGI:1351317]	1.66667	31.3333	3	5.33333	1.33333		0.0531915	-4.23266	0.0036773
Plxna4	6	32144268	32588192	-		Plxna4	ENSMUSG00000029765	plexin A4 [Source:MGI Symbol;Acc:MGI:2179061]	86.6667	4.66667	11.3333	24.6667	72.3333		18.5714	4.21501	1.51632e-05
Gm13856	6	34151929	34174235	+		Gm13856	ENSMUSG00000087356	predicted gene 13856 [Source:MGI Symbol;Acc:MGI:3652199]	111	55.3333	69	78	100.667		2.00602	1.00434	0.0140339
Slc35b4	6	34153380	34177111	-		Gm13856	ENSMUSG00000087356	predicted gene 13856 [Source:MGI Symbol;Acc:MGI:3652199]	1727	799.333	1358.33	1676.67	2063.33		2.16055	1.1114	1.75101e-09
Gm13855	6	34179232	34186392	+		Gm13855	ENSMUSG00000087613	predicted gene 13855 [Source:MGI Symbol;Acc:MGI:3652198]	8.66667	0	0	0.333333	0.333333		#DIV/0!	#DIV/0!	0.0106882
Akr1b8	6	34354119	34368463	+		Akr1b8	ENSMUSG00000029762	aldo-keto reductase family 1, member B8 [Source:MGI Symbol;Acc:MGI:107673]	252.667	9.66667	22.3333	65.3333	398.667		26.1379	4.70807	2.32292e-14
Akr1b7	6	34412334	34423142	+		Akr1b7	ENSMUSG00000052131	aldo-keto reductase family 1, member B7 [Source:MGI Symbol;Acc:MGI:101918]	50.6667	131.333	2	4	32.6667		0.385787	-1.37412	0.0207988
Tmem140	6	34863146	34874946	+		Tmem140	ENSMUSG00000057137	transmembrane protein 140 [Source:MGI Symbol;Acc:MGI:1915737]	1084.33	637.333	1538.33	1770	2083.67		1.70136	0.766688	0.000280606
3110062M04Rik	6	34871771	34878060	-		Tmem140	ENSMUSG00000057137	transmembrane protein 140 [Source:MGI Symbol;Acc:MGI:1915737]	853.333	523.333	1265	1528.33	1876		1.63057	0.705379	0.00100056
Wdr91	6	34880426	34910876	-		Wdr91	ENSMUSG00000058486	WD repeat domain 91 [Source:MGI Symbol;Acc:MGI:2141558]	1019	651.667	1200.33	1743	3136		1.56368	0.644948	0.00834393
Dgki	6	36846022	37300184	-		Dgki	ENSMUSG00000038665	diacylglycerol kinase, iota [Source:MGI Symbol;Acc:MGI:2443430]	290.667	140.667	23.6667	14	150		2.06635	1.04709	0.00533093
Hipk2	6	38694390	38876165	-		Hipk2	ENSMUSG00000061436	homeodomain interacting protein kinase 2 [Source:MGI Symbol;Acc:MGI:1314872]	754	405	666.667	541.333	834.667		1.86173	0.896643	0.0022656
Parp12	6	39086410	39118349	-		Parp12	ENSMUSG00000038507	poly (ADP-ribose) polymerase family, member 12 [Source:MGI Symbol;Acc:MGI:2143990]	671	335.333	1410.33	1183.33	914.667		2.00099	1.00072	0.00631689
Rab19	6	39381175	39390380	+		Rab19	ENSMUSG00000029923	RAB19, member RAS oncogene family [Source:MGI Symbol;Acc:MGI:103292]	145.667	256.667	400.667	365.667	249.667		0.567532	-0.817225	0.00830516
Dennd2a	6	39462378	39557867	-		Dennd2a	ENSMUSG00000038456	DENN/MADD domain containing 2A [Source:MGI Symbol;Acc:MGI:2444961]	85.3333	25.6667	37.3333	54	40.3333		3.32468	1.73321	0.000275321
E330009J07Rik	6	40401375	40436135	-		E330009J07Rik	ENSMUSG00000037172	RIKEN cDNA E330009J07 gene [Source:MGI Symbol;Acc:MGI:2444256]	1411.67	734.667	695.333	716.333	716.667		1.92151	0.942238	0.034709
Clec5a	6	40574894	40585821	-		Clec5a	ENSMUSG00000029915	C-type lectin domain family 5, member a [Source:MGI Symbol;Acc:MGI:1345151]	44.3333	143	135.667	1250.33	29.6667		0.310023	-1.68955	0.0435253
Trbv1	6	40891229	40891885	+		Trbv1	ENSMUSG00000076461	T cell receptor beta, variable 1 [Source:MGI Symbol;Acc:MGI:98594]	18.3333	74	32.6667	25.6667	44.3333		0.247748	-2.01306	0.0253814
Trbv2	6	41047340	41047995	+		Trbv2	ENSMUSG00000076462	T cell receptor beta, variable 2 [Source:MGI Symbol;Acc:MGI:98599]	21.6667	86.6667	28.6667	20.6667	38.6667		0.25	-2	0.0435326
Trbv3	6	41048290	41048828	+		Trbv3	ENSMUSG00000076463	T cell receptor beta, variable 3 [Source:MGI Symbol;Acc:MGI:98590]	28	106.667	38.6667	38.3333	52		0.2625	-1.92961	0.0293305
5830405F06Rik	6	41055883	41063102	+		5830405F06Rik	ENSMUSG00000103586	RIKEN cDNA 5830405F06 gene [Source:MGI Symbol;Acc:MGI:1923265]	28.3333	129.333	58.6667	43.6667	60.6667		0.219072	-2.19052	0.0170451
Trbv4	6	41059394	41059886	+		5830405F06Rik	ENSMUSG00000103586	RIKEN cDNA 5830405F06 gene [Source:MGI Symbol;Acc:MGI:1923265]	12	59	28.6667	21.3333	34.6667		0.20339	-2.29768	0.0428541
Trbv5	6	41062332	41062803	+		5830405F06Rik	ENSMUSG00000103586	RIKEN cDNA 5830405F06 gene [Source:MGI Symbol;Acc:MGI:1923265]	16	71.6667	30.3333	22.6667	28		0.223256	-2.16323	0.0299512
Trbv13-1	6	41116007	41116468	+		Trbv13-1	ENSMUSG00000076467	T cell receptor beta, variable 13-1 [Source:MGI Symbol;Acc:MGI:98609]	22.6667	84.6667	53.3333	35	46.6667		0.267717	-1.90122	0.0467677
Trbv13-3	6	41130147	41130585	+		Trbv13-3	ENSMUSG00000076470	T cell receptor beta, variable 13-3 [Source:MGI Symbol;Acc:MGI:98607]	14.3333	73.3333	49	51.3333	42		0.195455	-2.3551	0.0221096
Trbv19	6	41178375	41179048	+		Trbv19	ENSMUSG00000076475	T cell receptor beta, variable 19 [Source:MGI Symbol;Acc:MGI:98604]	26.3333	104	50.6667	40.6667	39		0.253205	-1.98162	0.0166865
Trbv26	6	41227505	41227993	+		Trbv26	ENSMUSG00000076479	T cell receptor beta, variable 26 [Source:MGI Symbol;Acc:MGI:98596]	6.66667	50	16	17.3333	12.3333		0.133333	-2.90689	0.00202963
Prss2	6	41521787	41525079	+		Prss2	ENSMUSG00000057163	protease, serine 2 [Source:MGI Symbol;Acc:MGI:102759]	0.333333	12.3333	6.33333	1.66667	3.33333		0.027027	-5.20945	0.00671622
Trbj1-1	6	41533864	41533911	+		Trbj1-1	ENSMUSG00000076483	T cell receptor beta joining 1-1 [Source:MGI Symbol;Acc:MGI:4439570]	3	37.6667	6.66667	4	8.33333		0.079646	-3.65025	1.42622e-05
Trbj1-2	6	41534001	41534048	+		Trbj1-2	ENSMUSG00000076484	T cell receptor beta joining 1-2 [Source:MGI Symbol;Acc:MGI:4439569]	3	29.3333	5.66667	4.66667	9		0.102273	-3.28951	0.000161933
Trbj1-3	6	41534323	41534376	+		Trbj1-3	ENSMUSG00000076485	T cell receptor beta joining 1-3 [Source:MGI Symbol;Acc:MGI:4439568]	2	18.3333	4	2.33333	7		0.109091	-3.1964	0.00751145
Trbj1-6	6	41535554	41535606	+		Trbj1-6	ENSMUSG00000076488	T cell receptor beta joining 1-6 [Source:MGI Symbol;Acc:MGI:4439575]	2.33333	16	5	3.33333	8		0.145833	-2.77761	0.034554
Trbc1	6	41538218	41539881	+		Trbc1	ENSMUSG00000076490	T cell receptor beta, constant region 1 [Source:MGI Symbol;Acc:MGI:4439726]	126.667	382	645.667	565.333	618		0.331588	-1.59254	2.64093e-08
Trbc2	6	41546730	41548352	+		Trbc2	ENSMUSG00000076498	T cell receptor beta, constant 2 [Source:MGI Symbol;Acc:MGI:4835227]	215.333	424	1077	1111.33	1173		0.507862	-0.977493	0.0181
Trbv31	6	41557691	41558452	-		Trbv31	ENSMUSG00000076499	T cell receptor beta, variable 31 [Source:MGI Symbol;Acc:MGI:98588]	15	54.3333	20.6667	23	36.3333		0.276074	-1.85688	0.0345391
Ephb6	6	41605482	41620509	+		Ephb6	ENSMUSG00000029869	Eph receptor B6 [Source:MGI Symbol;Acc:MGI:1096338]	38.3333	136.333	50	44.6667	51.3333		0.281174	-1.83047	1.68822e-05
Kel	6	41686330	41704339	-		Kel	ENSMUSG00000029866	Kell blood group [Source:MGI Symbol;Acc:MGI:1346053]	16	202.667	21.6667	51.6667	1		0.0789474	-3.66297	0.0137411
Tcaf2	6	42623016	42645254	-		Tcaf2	ENSMUSG00000029851	TRPM8 channel-associated factor 2 [Source:MGI Symbol;Acc:MGI:2385258]	12	0.666667	41.6667	0.333333	1.33333		18	4.16992	0.0318985
Arhgef5	6	43265582	43289320	+		Gm44731	ENSMUSG00000108190	predicted gene 44731 [Source:MGI Symbol;Acc:MGI:5753307]	51	176.667	65	23.6667	37.6667		0.288679	-1.79246	0.000716405
Sspo	6	48448229	48501250	+		Sspo	ENSMUSG00000029797	SCO-spondin [Source:MGI Symbol;Acc:MGI:2674311]	50.3333	94	44.3333	35	86.6667		0.535461	-0.901147	0.0482663
Gimap9	6	48676129	48679114	+		Gimap9	ENSMUSG00000051124	GTPase, IMAP family member 9 [Source:MGI Symbol;Acc:MGI:3511744]	474.667	793.333	1556	1270.33	1487.33		0.598319	-0.741012	0.00734806
Gimap7	6	48718621	48724636	+		Gm28053	ENSMUSG00000098715	predicted gene, 28053 [Source:MGI Symbol;Acc:MGI:5547789]	209.333	469.333	951.333	706.333	587.333		0.446023	-1.16481	0.0303726
Tmem176a	6	48840919	48847071	+		Tmem176b	ENSMUSG00000029810	transmembrane protein 176B [Source:MGI Symbol;Acc:MGI:1916348]	1147.33	653	1277.67	2566	4625.67		1.75702	0.81313	0.0027739
Gpnmb	6	49036546	49070929	+		Gpnmb	ENSMUSG00000029816	glycoprotein (transmembrane) nmb [Source:MGI Symbol;Acc:MGI:1934765]	1828	46.3333	7221.67	11925.3	10412		39.4532	5.30207	1.01768e-35
Gm43980	6	49254851	49256462	+		Tra2a	ENSMUSG00000029817	transformer 2 alpha homolog (Drosophila) [Source:MGI Symbol;Acc:MGI:1933972]	119.333	51.3333	39.6667	31.3333	155.333		2.32468	1.21703	0.0177029
Nfe2l3	6	51432670	51458768	+		Nfe2l3	ENSMUSG00000029832	nuclear factor, erythroid derived 2, like 3 [Source:MGI Symbol;Acc:MGI:1339958]	239	48	413.333	33.6667	222.667		4.97917	2.3159	0.0058192
Creb5	6	53287270	53700376	+		Creb5	ENSMUSG00000053007	cAMP responsive element binding protein 5 [Source:MGI Symbol;Acc:MGI:2443973]	93.6667	10	50.3333	79	20.3333		9.36667	3.22754	0.000380098
Chn2	6	54039554	54301810	+		Chn2	ENSMUSG00000004633	chimerin 2 [Source:MGI Symbol;Acc:MGI:1917243]	159	452.333	309.333	243.333	137		0.351511	-1.50836	5.93218e-07
9130019P16Rik	6	54269681	54430221	-		Chn2	ENSMUSG00000004633	chimerin 2 [Source:MGI Symbol;Acc:MGI:1917243]	15.6667	45	37	33.3333	17		0.348148	-1.52223	0.0133936
Plekha8	6	54595111	54645839	+		Fkbp14	ENSMUSG00000038074	FK506 binding protein 14 [Source:MGI Symbol;Acc:MGI:2387639]	271.333	149	287	214	148		1.82103	0.864754	0.0138919
Mturn	6	54681624	54703851	+		Gm28402	ENSMUSG00000101651	predicted gene 28402 [Source:MGI Symbol;Acc:MGI:5579108]	274.333	435.667	284	295.667	551.667		0.629686	-0.667295	0.0297378
Znrf2	6	54816916	54893500	+		Znrf2	ENSMUSG00000058446	zinc and ring finger 2 [Source:MGI Symbol;Acc:MGI:1196246]	1307.33	1840.33	3739.33	2861	3332.67		0.710379	-0.49334	0.011569
Aqp1	6	55336432	55348555	+		Aqp1	ENSMUSG00000004655	aquaporin 1 [Source:MGI Symbol;Acc:MGI:103201]	5.66667	598.333	68	57	0.666667		0.00947075	-6.72231	1.06081e-06
Nt5c3	6	56882400	56923932	-		Nt5c3	ENSMUSG00000029780	5'-nucleotidase, cytosolic III [Source:MGI Symbol;Acc:MGI:1927186]	444.333	642.333	1946.33	1443	992.667		0.691749	-0.53168	0.0418439
Vopp1	6	57727807	57825159	-		Lancl2	ENSMUSG00000062190	LanC (bacterial lantibiotic synthetase component C)-like 2 [Source:MGI Symbol;Acc:MGI:1919085]	1418.67	1040.67	2293.67	848.333	1789.67		1.36323	0.447028	0.0320625
Abcg2	6	58584523	58695676	+		Abcg2	ENSMUSG00000029802	ATP-binding cassette, sub-family G (WHITE), member 2 [Source:MGI Symbol;Acc:MGI:1347061]	91	346	115	61	82.3333		0.263006	-1.92683	9.74397e-11
Gprin3	6	59347226	59426294	-		Gprin3	ENSMUSG00000045441	GPRIN family member 3 [Source:MGI Symbol;Acc:MGI:1924785]	58	156	95.3333	45	121		0.371795	-1.42742	1.49532e-05
Ccser1	6	61180324	62382865	+		A730020E08Rik	ENSMUSG00000097924	RIKEN cDNA A730020E08 gene [Source:MGI Symbol;Acc:MGI:2444999]	43.6667	103	26	22.6667	25.6667		0.423948	-1.23804	0.0125873
Ndnf	6	65671590	65712326	+		Ndnf	ENSMUSG00000049001	neuron-derived neurotrophic factor [Source:MGI Symbol;Acc:MGI:1915419]	720.333	121.667	137	171.333	451.667		5.92055	2.56573	2.7613e-05
Gadd45a	6	67035096	67037457	-		Gadd45a	ENSMUSG00000036390	growth arrest and DNA-damage-inducible 45 alpha [Source:MGI Symbol;Acc:MGI:107799]	370	258.667	410.667	713.333	526.333		1.43041	0.516431	0.0433055
Il23r	6	67422932	67491855	-		Il23r	ENSMUSG00000049093	interleukin 23 receptor [Source:MGI Symbol;Acc:MGI:2181693]	54.6667	14	77	29	22.6667		3.90476	1.96523	0.024661
Gm42889	6	67532489	67556204	+		Gm42889	ENSMUSG00000105650	predicted gene 42889 [Source:MGI Symbol;Acc:MGI:5663026]	144.333	325.333	175	112.333	544.333		0.443648	-1.17251	4.72635e-06
Igkv4-71	6	69243158	69243445	-		Igkv4-71	ENSMUSG00000073028	immunoglobulin kappa chain variable 4-71 [Source:MGI Symbol;Acc:MGI:4439654]	1.66667	27.6667	5.33333	3.66667	2.33333		0.060241	-4.05311	0.0139683
Igkv4-62	6	69399810	69400097	-		Igkv4-62	ENSMUSG00000094262	immunoglobulin kappa variable 4-62 [Source:MGI Symbol;Acc:MGI:3643587]	5	30.3333	7.33333	3.33333	45.6667		0.164835	-2.6009	0.00262954
Gm30211	6	70719074	70740554	+		Gm30211	ENSMUSG00000105646	predicted gene, 30211 [Source:MGI Symbol;Acc:MGI:5589370]	115.333	228.667	1510	1253.67	731.333		0.504373	-0.987437	0.00310522
Rpia	6	70765720	70792232	-		Rpia	ENSMUSG00000053604	ribose 5-phosphate isomerase A [Source:MGI Symbol;Acc:MGI:103254]	378.667	532.333	1451	1011	1301.67		0.711334	-0.491401	0.040882
Gm44321	6	71276494	71279348	+		Smyd1	ENSMUSG00000055027	SET and MYND domain containing 1 [Source:MGI Symbol;Acc:MGI:104790]	65	22	21.3333	21.3333	52.6667		2.95455	1.56294	0.0298897
Gm44174	6	71353035	71373284	+		Gm44174	ENSMUSG00000108289	predicted gene, 44174 [Source:MGI Symbol;Acc:MGI:5690566]	0.666667	17.3333	3	1	3		0.0384615	-4.70044	0.0391965
Gm26628	6	71961145	71963775	-		Polr1a	ENSMUSG00000049553	polymerase (RNA) I polypeptide A [Source:MGI Symbol;Acc:MGI:1096397]	55.3333	26	41.3333	35	35		2.12821	1.08964	0.0489359
Elmod3	6	72565922	72598413	-		Elmod3	ENSMUSG00000056698	ELMO/CED-12 domain containing 3 [Source:MGI Symbol;Acc:MGI:2445168]	411.333	199.333	521.333	519.667	410.333		2.06355	1.04513	0.00152162
Retsat	6	72598475	72608425	+		Retsat	ENSMUSG00000056666	retinol saturase (all trans retinol 13,14 reductase) [Source:MGI Symbol;Acc:MGI:1914692]	275	147.667	182.667	174	166		1.8623	0.897087	0.000882065
Tcf7l1	6	72626378	72789254	-		Tcf7l1	ENSMUSG00000055799	transcription factor 7 like 1 (T cell specific, HMG box) [Source:MGI Symbol;Acc:MGI:1202876]	97	16.3333	42	38.3333	124.333		5.93878	2.57017	0.000647647
Gm20560	6	73012043	73020360	+		Gm20560	ENSMUSG00000107546	predicted gene, 20560 [Source:MGI Symbol;Acc:MGI:5295667]	28.3333	0.666667	2.33333	16.3333	2		42.5	5.40939	0.000132522
Dnah6	6	73017606	73221651	-		Gm20560	ENSMUSG00000107546	predicted gene, 20560 [Source:MGI Symbol;Acc:MGI:5295667]	117.667	8	139.333	55	34		14.7083	3.87856	9.05997e-07
Sema4f	6	82911885	82939769	-		Sema4f	ENSMUSG00000000627	sema domain, immunoglobulin domain (Ig), TM domain, and short cytoplasmic domain [Source:MGI Symbol;Acc:MGI:1340055]	94.3333	231	89.3333	97.3333	183.667		0.408369	-1.29205	0.00597812
Dok1	6	83030934	83033471	-		Dok1	ENSMUSG00000068335	docking protein 1 [Source:MGI Symbol;Acc:MGI:893587]	919	577.333	2690.33	3045.67	2899.67		1.5918	0.67066	0.000379251
Loxl3	6	83034173	83052562	+		Loxl3	ENSMUSG00000000693	lysyl oxidase-like 3 [Source:MGI Symbol;Acc:MGI:1337004]	843	327.333	858.667	1108.67	1733.67		2.57536	1.36477	5.91982e-14
Htra2	6	83051266	83055273	-		Loxl3	ENSMUSG00000000693	lysyl oxidase-like 3 [Source:MGI Symbol;Acc:MGI:1337004]	1111	758	2855	3057	3336.33		1.4657	0.551589	0.000908099
Dqx1	6	83057844	83067318	+		Dqx1	ENSMUSG00000009145	DEAQ RNA-dependent ATPase [Source:MGI Symbol;Acc:MGI:2136388]	194.667	74.3333	99.6667	121	291.333		2.61883	1.38892	0.000344543
Actg2	6	83512905	83536265	-		Actg2	ENSMUSG00000059430	actin, gamma 2, smooth muscle, enteric [Source:MGI Symbol;Acc:MGI:104589]	56.6667	4.66667	21.6667	41	2.33333		12.1429	3.60204	0.000471129
Nagk	6	83794982	83804018	+		Nagk	ENSMUSG00000034744	N-acetylglucosamine kinase [Source:MGI Symbol;Acc:MGI:1860418]	478	309.333	629.333	741	908.667		1.54526	0.627848	0.00563866
Paip2b	6	83805401	83831741	-		Paip2b	ENSMUSG00000045896	poly(A) binding protein interacting protein 2B [Source:MGI Symbol;Acc:MGI:2386865]	555.667	799	840.333	531	913		0.695453	-0.523976	0.0272938
Exoc6b	6	84618487	85069513	-		Exoc6b	ENSMUSG00000033769	exocyst complex component 6B [Source:MGI Symbol;Acc:MGI:1923164]	741	374.667	598.333	528.333	492.333		1.97776	0.983866	4.84886e-05
Sfxn5	6	85213049	85333422	-		Sfxn5	ENSMUSG00000033720	sideroflexin 5 [Source:MGI Symbol;Acc:MGI:2137681]	208.667	103	193	294.333	147.333		2.02589	1.01856	0.00523121
Rab11fip5	6	85334962	85374634	-		Rab11fip5	ENSMUSG00000051343	RAB11 family interacting protein 5 (class I) [Source:MGI Symbol;Acc:MGI:1098586]	306.333	161.333	185	321.667	261.333		1.89876	0.925058	0.00523121
Pradc1	6	85446810	85451970	-		Pradc1	ENSMUSG00000030008	protease-associated domain containing 1 [Source:MGI Symbol;Acc:MGI:1920577]	104.667	176.333	170.667	157.667	182.333		0.593573	-0.752503	0.0203752
Add2	6	86028681	86124409	+		Add2	ENSMUSG00000030000	adducin 2 (beta) [Source:MGI Symbol;Acc:MGI:87919]	9.66667	302.333	14.6667	19	0		0.0319735	-4.96698	0.00244171
Gm44089	6	86084366	86087080	-		Add2	ENSMUSG00000030000	adducin 2 (beta) [Source:MGI Symbol;Acc:MGI:87919]	0.333333	30	1	0.666667	0		0.0111111	-6.49185	0.00413496
Asprv1	6	86628164	86629710	+		Asprv1	ENSMUSG00000033508	aspartic peptidase, retroviral-like 1 [Source:MGI Symbol;Acc:MGI:1915105]	583.667	159.667	89.6667	2779.67	2649.67		3.65553	1.87008	5.27227e-17
Mxd1	6	86647042	86669161	-		Mxd1	ENSMUSG00000001156	MAX dimerization protein 1 [Source:MGI Symbol;Acc:MGI:96908]	2529.67	1412.33	3396.33	8677.33	6085.67		1.79113	0.840867	0.000199815
Gm44292	6	86663188	86665551	-		Mxd1	ENSMUSG00000001156	MAX dimerization protein 1 [Source:MGI Symbol;Acc:MGI:96908]	31	7	4	6.66667	21.3333		4.42857	2.14684	0.0349497
Gm44036	6	86733489	86737065	+		Gm44036	ENSMUSG00000107961	predicted gene, 44036 [Source:MGI Symbol;Acc:MGI:5690428]	45	15.6667	71	128.667	107.667		2.87234	1.52223	0.00845267
Anxa4	6	86736840	86793584	-		Gm44036	ENSMUSG00000107961	predicted gene, 44036 [Source:MGI Symbol;Acc:MGI:5690428]	1346.33	439.667	3068	4926	4089		3.06217	1.61455	3.02777e-21
Gfpt1	6	87042846	87092197	+		Gfpt1	ENSMUSG00000029992	glutamine fructose-6-phosphate transaminase 1 [Source:MGI Symbol;Acc:MGI:95698]	3641	1456	3743.33	5030	4833		2.50069	1.32232	8.6355e-09
D6Ertd527e	6	87104746	87112997	+		D6Ertd527e	ENSMUSG00000090891	DNA segment, Chr 6, ERATO Doi 527, expressed [Source:MGI Symbol;Acc:MGI:1261919]	54.6667	21	13.6667	16.3333	28.3333		2.60317	1.38027	0.0360294
Antxr1	6	87133853	87335821	-		Antxr1	ENSMUSG00000033420	anthrax toxin receptor 1 [Source:MGI Symbol;Acc:MGI:1916788]	70.6667	20.3333	18.6667	34.6667	14.3333		3.47541	1.79718	0.000556516
Prokr1	6	87578591	87590743	-		Prokr1	ENSMUSG00000049409	prokineticin receptor 1 [Source:MGI Symbol;Acc:MGI:1929676]	51	12.3333	23	31	47.3333		4.13514	2.04793	0.0020052
Rab43	6	87788853	87812164	-		Rab43	ENSMUSG00000030055	RAB43, member RAS oncogene family [Source:MGI Symbol;Acc:MGI:1917084]	1805	2406.67	5931	3700.67	5069.33		0.75	-0.415038	0.00435032
B130021K23Rik	6	87830274	87832866	-		Gm45140	ENSMUSG00000107928	predicted gene 45140 [Source:MGI Symbol;Acc:MGI:5753716]	29.6667	7.33333	3.66667	1.33333	10		4.04545	2.0163	0.00583718
H1fx	6	87980421	87981637	-		H1fx	ENSMUSG00000044927	H1 histone family, member X [Source:MGI Symbol;Acc:MGI:2685307]	16.6667	2.66667	22.3333	72	19.3333		6.25	2.64386	0.0152078
Gm44187	6	88040539	88042467	-		Rab7	ENSMUSG00000079477	RAB7, member RAS oncogene family [Source:MGI Symbol;Acc:MGI:105068]	0.666667	18.6667	0.333333	2	1		0.0357143	-4.80735	0.00295733
Gata2	6	88193891	88207032	+		Gata2	ENSMUSG00000015053	GATA binding protein 2 [Source:MGI Symbol;Acc:MGI:95662]	16.6667	86.6667	34.3333	85.3333	14		0.192308	-2.37851	5.18244e-06
Mcm2	6	88883474	88898780	-		Mcm2	ENSMUSG00000002870	minichromosome maintenance complex component 2 [Source:MGI Symbol;Acc:MGI:105380]	638	904.667	1481	791	1280		0.705232	-0.50383	0.0246244
Tpra1	6	88902251	88912238	+		Tpra1	ENSMUSG00000002871	transmembrane protein, adipocyte asscociated 1 [Source:MGI Symbol;Acc:MGI:1345190]	707.333	408	951.333	809.667	1355.33		1.73366	0.793821	2.95044e-05
Gm1965	6	89140994	89147388	+		Gm1965	ENSMUSG00000090254	predicted gene 1965 [Source:MGI Symbol;Acc:MGI:3584270]	14.6667	38.3333	17.3333	46	43.3333		0.382609	-1.38606	0.0307877
Gm26811	6	89304630	89327621	+		Gm26811	ENSMUSG00000097816	predicted gene, 26811 [Source:MGI Symbol;Acc:MGI:5477305]	272	110.333	161	307.667	537.333		2.46526	1.30174	0.000729526
Plxna1	6	89316314	89362620	-		Gm26811	ENSMUSG00000097816	predicted gene, 26811 [Source:MGI Symbol;Acc:MGI:5477305]	1872.67	733.333	1266	2342.33	4027.67		2.55364	1.35255	0.000363231
Aldh1l1	6	90486427	90600203	+		Gm45901	ENSMUSG00000108111	predicted gene 45901 [Source:MGI Symbol;Acc:MGI:5805016]	230.667	47	34.6667	242.667	48		4.9078	2.29508	3.08185e-06
Slc41a3	6	90604725	90646412	+		Slc41a3	ENSMUSG00000030089	solute carrier family 41, member 3 [Source:MGI Symbol;Acc:MGI:1918949]	244.667	129.667	149	273.667	251		1.88689	0.91601	0.0448246
Nup210	6	91013068	91116829	-		Nup210	ENSMUSG00000030091	nucleoporin 210 [Source:MGI Symbol;Acc:MGI:1859555]	1674.33	2336.67	5410.33	3461	6136.67		0.716548	-0.480865	0.0226461
Slc6a6	6	91684053	91759066	+		Slc6a6	ENSMUSG00000030096	solute carrier family 6 (neurotransmitter transporter, taurine), member 6 [Source:MGI Symbol;Acc:MGI:98488]	3644	2272.67	5534.33	6464	8860.33		1.6034	0.681137	0.00472186
Grip2	6	91761509	91827250	-		Grip2	ENSMUSG00000030098	glutamate receptor interacting protein 2 [Source:MGI Symbol;Acc:MGI:2681173]	2.33333	20	0	0.333333	10.6667		0.116667	-3.09954	0.0117005
Ccdc174	6	91878053	91899843	+		Ccdc174	ENSMUSG00000034083	coiled-coil domain containing 174 [Source:MGI Symbol;Acc:MGI:2444652]	445.333	655	560	590	573.667		0.679898	-0.556609	0.00484732
Fgd5	6	91978878	92076004	+		Fgd5	ENSMUSG00000034037	FYVE, RhoGEF and PH domain containing 5 [Source:MGI Symbol;Acc:MGI:2443369]	85.3333	6.33333	9.66667	42.6667	24.6667		13.4737	3.75207	5.47087e-13
Lrig1	6	94604529	94700158	-		Slc25a26	ENSMUSG00000045100	solute carrier family 25 (mitochondrial carrier, phosphate carrier), member 26 [Source:MGI Symbol;Acc:MGI:1914832]	163.667	282.333	310.667	175.333	258		0.579693	-0.786639	0.0166685
Arl6ip5	6	97210689	97233315	+		Arl6ip5	ENSMUSG00000035199	ADP-ribosylation factor-like 6 interacting protein 5 [Source:MGI Symbol;Acc:MGI:1929501]	636	1069.33	2576.33	2514	2397.67		0.594763	-0.749613	0.0013152
Frmd4b	6	97286867	97617541	-		Frmd4b	ENSMUSG00000030064	FERM domain containing 4B [Source:MGI Symbol;Acc:MGI:2141794]	784.333	1119.33	307.667	235	992		0.700715	-0.513101	0.000869804
Mitf	6	97807052	98021349	+		Mitf	ENSMUSG00000035158	microphthalmia-associated transcription factor [Source:MGI Symbol;Acc:MGI:104554]	345.333	150.667	268.667	347	514.333		2.29204	1.19663	0.000189595
Prok2	6	99711299	99726392	-		Prok2	ENSMUSG00000030069	prokineticin 2 [Source:MGI Symbol;Acc:MGI:1354178]	0.333333	24	17.3333	55.3333	0.333333		0.0138889	-6.16992	0.0490521
Il5ra	6	106710357	106749037	-		Il5ra	ENSMUSG00000005364	interleukin 5 receptor, alpha [Source:MGI Symbol;Acc:MGI:96558]	1175.67	286	1473.67	1329	928		4.11072	2.03939	4.98803e-11
Lmcd1	6	112273758	112330425	+		Lmcd1	ENSMUSG00000057604	LIM and cysteine-rich domains 1 [Source:MGI Symbol;Acc:MGI:1353635]	96.3333	4	317	463.333	13.3333		24.0833	4.58996	4.52571e-09
Camk1	6	113334124	113343984	-		Ogg1	ENSMUSG00000030271	8-oxoguanine DNA-glycosylase 1 [Source:MGI Symbol;Acc:MGI:1097693]	453.333	224	178	361.667	580.667		2.02381	1.01707	0.000206877
Gm26982	6	113714971	113716121	+		Gm26982	ENSMUSG00000097994	predicted gene, 26982 [Source:MGI Symbol;Acc:MGI:5504097]	86.6667	162.333	98.6667	95.3333	159.333		0.533881	-0.90541	0.0491981
Hrh1	6	114397936	114483296	+		Hrh1	ENSMUSG00000053004	histamine receptor H1 [Source:MGI Symbol;Acc:MGI:107619]	36.3333	118.333	18.3333	16.3333	64.6667		0.307042	-1.70349	0.000141552
Pparg	6	115360951	115490399	+		Pparg	ENSMUSG00000000440	peroxisome proliferator activated receptor gamma [Source:MGI Symbol;Acc:MGI:97747]	393.333	527	157	170.667	590		0.746363	-0.42205	0.0408864
Tmem40	6	115729131	115762410	-		Tmem40	ENSMUSG00000059900	transmembrane protein 40 [Source:MGI Symbol;Acc:MGI:2137870]	3	18.6667	11.6667	228.667	2		0.160714	-2.63743	0.0202179
Ift122	6	115853470	115926699	+		Ift122	ENSMUSG00000030323	intraflagellar transport 122 [Source:MGI Symbol;Acc:MGI:1932386]	175.667	71	180	120	142.667		2.47418	1.30695	5.33607e-06
Plxnd1	6	115954811	115995005	-		Plxnd1	ENSMUSG00000030123	plexin D1 [Source:MGI Symbol;Acc:MGI:2154244]	2116	854.333	4146	5604.67	2863.67		2.47679	1.30847	2.33645e-10
Alox5	6	116410077	116461178	-		Alox5	ENSMUSG00000025701	arachidonate 5-lipoxygenase [Source:MGI Symbol;Acc:MGI:87999]	57.6667	119	83.3333	514.333	34.6667		0.484594	-1.04515	0.0237358
Rassf4	6	116633008	116673952	-		Rassf4	ENSMUSG00000042129	Ras association (RalGDS/AF-6) domain family member 4 [Source:MGI Symbol;Acc:MGI:2386853]	2740.33	2032.33	3998	4029.33	5368.33		1.34837	0.431214	0.0381202
Cxcl12	6	117168535	117181367	+		Cxcl12	ENSMUSG00000061353	chemokine (C-X-C motif) ligand 12 [Source:MGI Symbol;Acc:MGI:103556]	1	17	23	3	2		0.0588235	-4.08746	0.0205313
Fbxl14	6	119479668	119482630	+		Wnt5b	ENSMUSG00000030170	wingless-type MMTV integration site family, member 5B [Source:MGI Symbol;Acc:MGI:98959]	508	837.667	1612.67	1291.33	1582.67		0.606446	-0.721548	2.11382e-05
Erc1	6	119570796	119848167	-		Erc1	ENSMUSG00000030172	ELKS/RAB6-interacting/CAST family member 1 [Source:MGI Symbol;Acc:MGI:2151013]	369.333	191.667	317.333	209.667	279.333		1.92696	0.946324	0.000102039
Gm44317	6	119570941	119578057	+		Erc1	ENSMUSG00000030172	ELKS/RAB6-interacting/CAST family member 1 [Source:MGI Symbol;Acc:MGI:2151013]	75.3333	33.6667	78	55.3333	81		2.23762	1.16197	0.0125515
Il17ra	6	120463247	120487559	+		Il17ra	ENSMUSG00000002897	interleukin 17 receptor A [Source:MGI Symbol;Acc:MGI:107399]	1287.33	2233	5601.67	3320.33	5175.33		0.576504	-0.794598	0.00131724
Hdhd5	6	120509494	120531319	-		Hdhd5	ENSMUSG00000058979	haloacid dehalogenase like hydrolase domain containing 5 [Source:MGI Symbol;Acc:MGI:2136976]	343.667	654.667	502.333	447.667	708		0.524949	-0.929751	2.1595e-07
Cecr2	6	120666369	120771190	+		Cecr2	ENSMUSG00000071226	CECR2, histone acetyl-lysine reader [Source:MGI Symbol;Acc:MGI:1923799]	569.333	279.667	83.6667	69	835.667		2.03576	1.02557	0.0339433
Mical3	6	120931707	121130999	-		Mical3	ENSMUSG00000051586	microtubule associated monooxygenase, calponin and LIM domain containing 3 [Source:MGI Symbol;Acc:MGI:2442733]	1617	526.667	1259.33	1271.67	1720.67		3.07025	1.61836	1.39202e-11
Gm43916	6	120951901	120952867	+		Mical3	ENSMUSG00000051586	microtubule associated monooxygenase, calponin and LIM domain containing 3 [Source:MGI Symbol;Acc:MGI:2442733]	185.333	15.6667	143	208.667	57.3333		11.8298	3.56435	5.55012e-14
Slc6a12	6	121343076	121365775	+		Slc6a12	ENSMUSG00000030109	solute carrier family 6 (neurotransmitter transporter, betaine/GABA), member 12 [Source:MGI Symbol;Acc:MGI:95628]	222.667	72.3333	99.3333	154.333	31		3.07834	1.62215	1.23659e-05
Klrg1	6	122270596	122282882	-		Klrg1	ENSMUSG00000030114	killer cell lectin-like receptor subfamily G, member 1 [Source:MGI Symbol;Acc:MGI:1355294]	13.3333	356.333	19.3333	27.6667	26.6667		0.0374181	-4.74012	0
Apobec1	6	122577792	122602444	-		Apobec1	ENSMUSG00000040613	apolipoprotein B mRNA editing enzyme, catalytic polypeptide 1 [Source:MGI Symbol;Acc:MGI:103298]	1155.67	776	1935.67	1996	2658.67		1.48926	0.574597	0.00960585
Slc2a3	6	122727809	122801640	-		Slc2a3	ENSMUSG00000003153	solute carrier family 2 (facilitated glucose transporter), member 3 [Source:MGI Symbol;Acc:MGI:95757]	409.667	958.667	793.333	1318.33	793.333		0.42733	-1.22658	6.20171e-12
Clec4b1	6	123049962	123071555	+		Clec4b1	ENSMUSG00000030147	C-type lectin domain family 4, member b1 [Source:MGI Symbol;Acc:MGI:1917060]	36	147.667	96.6667	13	40.3333		0.243792	-2.03628	2.95011e-05
Clec4b2	6	123172893	123204671	+		Clec4b2	ENSMUSG00000067767	C-type lectin domain family 4, member b2 [Source:MGI Symbol;Acc:MGI:3588267]	1	28	127.667	50.3333	0		0.0357143	-4.80735	0.000334565
Clec4d	6	123262111	123275265	+		Clec4d	ENSMUSG00000030144	C-type lectin domain family 4, member d [Source:MGI Symbol;Acc:MGI:1298389]	673.333	253.667	1127.67	6087.67	805.333		2.6544	1.40839	0.0106041
Cd163	6	124304656	124330527	+		Cd163	ENSMUSG00000008845	CD163 antigen [Source:MGI Symbol;Acc:MGI:2135946]	397	1126	22.3333	22.6667	191.667		0.352575	-1.504	1.99509e-08
Eno2	6	124760053	124769673	-		Eno2	ENSMUSG00000004267	enolase 2, gamma neuronal [Source:MGI Symbol;Acc:MGI:95394]	757	117.667	162.667	376.333	1051.33		6.43343	2.68559	1.79487e-09
Lag3	6	124904361	124911705	-		Lag3	ENSMUSG00000030124	lymphocyte-activation gene 3 [Source:MGI Symbol;Acc:MGI:106588]	162	434.667	1386	788.667	672.667		0.372699	-1.42392	6.01197e-07
Pianp	6	124996694	125003096	+		Pianp	ENSMUSG00000030329	PILR alpha associated neural protein [Source:MGI Symbol;Acc:MGI:2441908]	16.3333	72	38	15.6667	35		0.226852	-2.14018	0.0125515
Cd27	6	125232622	125237010	-		Vamp1	ENSMUSG00000030337	vesicle-associated membrane protein 1 [Source:MGI Symbol;Acc:MGI:1313276]	179.667	521.667	405.667	413.333	489		0.344409	-1.53781	1.35828e-06
Scnn1a	6	125320659	125344943	+		Scnn1a	ENSMUSG00000030340	sodium channel, nonvoltage-gated 1 alpha [Source:MGI Symbol;Acc:MGI:101782]	28	111.333	12.6667	47.6667	19.6667		0.251497	-1.99139	1.49184e-06
Vwf	6	125546774	125686679	+		Vwf	ENSMUSG00000001930	Von Willebrand factor [Source:MGI Symbol;Acc:MGI:98941]	93.3333	188.667	71.3333	267.333	277.333		0.4947	-1.01538	0.0411352
Dyrk4	6	126876020	126921839	-		Dyrk4	ENSMUSG00000030345	dual-specificity tyrosine-(Y)- phosphorylation regulated kinase 4 [Source:MGI Symbol;Acc:MGI:1330292]	112.667	19	188.333	210	27.6667		5.92982	2.56799	1.51756e-06
Ccnd2	6	127125162	127152193	-		Gm43126	ENSMUSG00000107379	predicted gene 43126 [Source:MGI Symbol;Acc:MGI:5663263]	1653.33	2169.67	4493.67	1737.33	2233		0.762022	-0.392096	0.0241158
Parp11	6	127446840	127494261	+		Parp11	ENSMUSG00000037997	poly (ADP-ribose) polymerase family, member 11 [Source:MGI Symbol;Acc:MGI:2141505]	644.667	415.667	743.333	619.333	953		1.55092	0.633126	0.0403178
Tspan9	6	127961396	128143594	-		Tspan9	ENSMUSG00000030352	tetraspanin 9 [Source:MGI Symbol;Acc:MGI:1924558]	106.333	256.333	31.3333	28	90		0.414824	-1.26943	0.00592876
Tulp3	6	128321161	128355851	-		Tulp3	ENSMUSG00000001521	tubby-like protein 3 [Source:MGI Symbol;Acc:MGI:1329045]	172.333	93.3333	320.333	155.333	143		1.84643	0.884737	0.0156974
Klrb1a	6	128609227	128623533	-		Klrb1a	ENSMUSG00000030361	killer cell lectin-like receptor subfamily B member 1A [Source:MGI Symbol;Acc:MGI:107540]	1	249	0.666667	2	11.6667		0.00401606	-7.96	1.29195e-16
Klrb1	6	128705836	128723059	-		Klrb1	ENSMUSG00000079299	killer cell lectin-like receptor subfamily B member 1 [Source:MGI Symbol;Acc:MGI:96877]	15.3333	77.6667	0.666667	3	27		0.197425	-2.34062	0.00137545
Klrb1c	6	128778485	128789215	-		Klrb1c	ENSMUSG00000030325	killer cell lectin-like receptor subfamily B member 1C [Source:MGI Symbol;Acc:MGI:107538]	15.6667	1391.33	31	29.3333	146		0.0112602	-6.47263	0
Gm44511	6	128780285	128826315	-		Klrb1c	ENSMUSG00000030325	killer cell lectin-like receptor subfamily B member 1C [Source:MGI Symbol;Acc:MGI:107538]	115	469	147	88.6667	138		0.245203	-2.02795	2.12013e-08
Gm44067	6	128843786	128846959	-		Gm26656	ENSMUSG00000096931	predicted gene, 26656 [Source:MGI Symbol;Acc:MGI:5477150]	3.66667	37.6667	7.33333	2	3.33333		0.0973451	-3.36075	0.00838464
Gm26656	6	128843786	128846959	+		Gm26656	ENSMUSG00000096931	predicted gene, 26656 [Source:MGI Symbol;Acc:MGI:5477150]	3.66667	37.6667	7.33333	2	3.33333		0.0973451	-3.36075	0.00838464
BC035044	6	128849090	128891126	-		BC035044	ENSMUSG00000090164	cDNA sequence BC035044 [Source:MGI Symbol;Acc:MGI:2448540]	333.667	707.667	805	178.333	486.333		0.471503	-1.08466	6.35199e-06
Klrb1f	6	129045901	129057464	+		Klrb1f	ENSMUSG00000030154	killer cell lectin-like receptor subfamily B member 1F [Source:MGI Symbol;Acc:MGI:2442965]	31.3333	405.667	81.6667	40.6667	69.3333		0.0772391	-3.69452	1.10413e-29
Cd69	6	129267325	129275436	-		Cd69	ENSMUSG00000030156	CD69 antigen [Source:MGI Symbol;Acc:MGI:88343]	503.667	1241.33	765	554.667	586		0.405746	-1.30135	0.000229013
Clec9a	6	129408862	129424763	+		Clec1b	ENSMUSG00000030159	C-type lectin domain family 1, member b [Source:MGI Symbol;Acc:MGI:1913287]	205	763	225.667	209.667	331.333		0.268676	-1.89606	1.58248e-12
Tmem52b	6	129512555	129519227	+		Tmem52b	ENSMUSG00000030160	transmembrane protein 52B [Source:MGI Symbol;Acc:MGI:2442838]	19	1.33333	4.66667	8.33333	2		14.25	3.83289	0.0081224
Klre1	6	129577905	129585827	+		Klre1	ENSMUSG00000050241	killer cell lectin-like receptor family E member 1 [Source:MGI Symbol;Acc:MGI:2662547]	61.6667	597	110.667	34	147.333		0.103294	-3.27517	4.51579e-22
Klrd1	6	129591782	129598775	+		Klrd1	ENSMUSG00000030165	killer cell lectin-like receptor, subfamily D, member 1 [Source:MGI Symbol;Acc:MGI:1196275]	354	753	251.667	423	892		0.47012	-1.0889	2.06748e-06
Klrk1	6	129610323	129623864	-		Klrk1	ENSMUSG00000030149	killer cell lectin-like receptor subfamily K, member 1 [Source:MGI Symbol;Acc:MGI:1196250]	422.667	1469.33	525.333	337.333	694		0.287659	-1.79757	1.29378e-22
Klrc3	6	129639064	129643337	-		Klrc3	ENSMUSG00000033027	killer cell lectin-like receptor subfamily C, member 3 [Source:MGI Symbol;Acc:MGI:1929720]	2.66667	52	1.66667	0.333333	9		0.0512821	-4.2854	8.90442e-08
Klrc2	6	129647496	129660689	-		Klrc2	ENSMUSG00000052736	killer cell lectin-like receptor subfamily C, member 2 [Source:MGI Symbol;Acc:MGI:1336162]	34.3333	416.667	27	10.3333	85.3333		0.0824	-3.60121	1.38613e-10
Klrc1	6	129666015	129678973	-		Klrc1	ENSMUSG00000030167	killer cell lectin-like receptor subfamily C, member 1 [Source:MGI Symbol;Acc:MGI:1336161]	185	434.333	179.333	90.3333	180		0.42594	-1.23128	0.00431729
Klri1	6	129697218	129717132	-		Klri1	ENSMUSG00000067610	killer cell lectin-like receptor family I member 1 [Source:MGI Symbol;Acc:MGI:3530275]	207	365	61	31.3333	233.667		0.567123	-0.818266	0.0196083
Klri2	6	129729041	129740484	-		Klri2	ENSMUSG00000043932	killer cell lectin-like receptor family I member 2 [Source:MGI Symbol;Acc:MGI:2443965]	240	1427	238	83.6667	310.667		0.168185	-2.57188	8.9266e-14
Klra17	6	129831154	129876672	-		Klra17	ENSMUSG00000014543	killer cell lectin-like receptor, subfamily A, member 17 [Source:MGI Symbol;Acc:MGI:2180674]	130.667	284	155.333	165	209.333		0.460094	-1.12	0.00248687
Klra5	6	129898996	129917650	-		Klra5	ENSMUSG00000030173	killer cell lectin-like receptor, subfamily A, member 5 [Source:MGI Symbol;Acc:MGI:101903]	9.66667	67	6.33333	1.66667	7.33333		0.144279	-2.79307	1.1161e-06
Klra6	6	130013033	130026954	-		Klra6	ENSMUSG00000061769	killer cell lectin-like receptor, subfamily A, member 6 [Source:MGI Symbol;Acc:MGI:101902]	10	102.333	22	3.33333	8.66667		0.0977199	-3.3552	0.000236332
Klra4	6	130043731	130067271	-		Klra4	ENSMUSG00000079852	killer cell lectin-like receptor, subfamily A, member 4 [Source:MGI Symbol;Acc:MGI:101904]	24.6667	906	114.667	29.3333	187		0.0272259	-5.19888	0
Klra8	6	130115226	130129898	-		Klra8	ENSMUSG00000089727	killer cell lectin-like receptor, subfamily A, member 8 [Source:MGI Symbol;Acc:MGI:102968]	9	598.667	146.667	18.3333	154.667		0.0150334	-6.05568	0
Klra9	6	130178675	130193112	-		Klra9	ENSMUSG00000033024	killer cell lectin-like receptor subfamily A, member 9 [Source:MGI Symbol;Acc:MGI:1321153]	16	474.667	63	30.3333	42		0.0337079	-4.89077	0
Klra7	6	130218605	130233322	-		Klra7	ENSMUSG00000067599	killer cell lectin-like receptor, subfamily A, member 7 [Source:MGI Symbol;Acc:MGI:101901]	33	498.667	84	14	77		0.0661765	-3.91754	4.51449e-15
Klra10	6	130269194	130281928	-		Klra10	ENSMUSG00000072718	killer cell lectin-like receptor subfamily A, member 10 [Source:MGI Symbol;Acc:MGI:1321093]	0	57.6667	1.33333	0.333333	5		0	#NUM!	5.01148e-09
Klra3	6	130323289	130337574	-		Klra3	ENSMUSG00000067591	killer cell lectin-like receptor, subfamily A, member 3 [Source:MGI Symbol;Acc:MGI:101905]	53	285.333	39.6667	42	32		0.185748	-2.42858	1.81715e-18
Klra1	6	130363917	130386874	-		Klra1	ENSMUSG00000079853	killer cell lectin-like receptor, subfamily A, member 1 [Source:MGI Symbol;Acc:MGI:101907]	43	266	51	53.6667	30		0.161654	-2.62902	0.000591647
Klra2	6	131219223	131247362	-		Klra2	ENSMUSG00000030187	killer cell lectin-like receptor, subfamily A, member 2 [Source:MGI Symbol;Acc:MGI:101906]	123	352.333	140.667	174.667	23.6667		0.349101	-1.51828	0.000252889
Styk1	6	131299142	131353597	-		Styk1	ENSMUSG00000032899	serine/threonine/tyrosine kinase 1 [Source:MGI Symbol;Acc:MGI:2141396]	16.3333	165	13.3333	2.66667	15.6667		0.0989899	-3.33657	5.61869e-14
Etv6	6	134035700	134270158	+		Etv6	ENSMUSG00000030199	ets variant 6 [Source:MGI Symbol;Acc:MGI:109336]	2384	1648.67	4208.67	2969.67	3774.33		1.44602	0.532085	0.0435438
4933406J09Rik	6	134308951	134403415	-		4933406J09Rik	ENSMUSG00000107666	RIKEN cDNA 4933406J09 gene [Source:MGI Symbol;Acc:MGI:1921314]	32.6667	0.666667	20.3333	13.3333	15.3333		49	5.61471	0.000247924
Bcl2l14	6	134396318	134438736	+		4933406J09Rik	ENSMUSG00000107666	RIKEN cDNA 4933406J09 gene [Source:MGI Symbol;Acc:MGI:1921314]	1225	153.333	3230.33	3320.67	1999.67		7.98913	2.99804	4.8421e-19
Gm44448	6	134404077	134424353	-		Bcl2l14	ENSMUSG00000030200	BCL2-like 14 (apoptosis facilitator) [Source:MGI Symbol;Acc:MGI:1914063]	7.33333	0	2.33333	2	2.33333		#DIV/0!	#DIV/0!	0.0239353
Dusp16	6	134715468	134792625	-		Dusp16	ENSMUSG00000030203	dual specificity phosphatase 16 [Source:MGI Symbol;Acc:MGI:1917936]	1832	1132	1715.67	1075.67	1451		1.61837	0.694546	0.0269155
Crebl2	6	134830154	134858931	+		Crebl2	ENSMUSG00000032652	cAMP responsive element binding protein-like 2 [Source:MGI Symbol;Acc:MGI:1889385]	942.333	642	1278.33	1137.67	1286.33		1.46781	0.553664	0.0198044
Apold1	6	134981718	134986836	+		Apold1	ENSMUSG00000090698	apolipoprotein L domain containing 1 [Source:MGI Symbol;Acc:MGI:2685921]	98.3333	16.6667	9.66667	5.66667	2.33333		5.9	2.56072	7.92199e-08
Gprc5d	6	135105991	135118283	-		Gprc5d	ENSMUSG00000030205	G protein-coupled receptor, family C, group 5, member D [Source:MGI Symbol;Acc:MGI:1935037]	76.6667	0.666667	4	14	111.333		115	6.84549	2.56084e-07
Plbd1	6	136612070	136661928	-		Plbd1	ENSMUSG00000030214	phospholipase B domain containing 1 [Source:MGI Symbol;Acc:MGI:1914107]	996.333	1771	2630.33	2158.67	1806.67		0.562582	-0.829864	0.00293205
Hist4h4	6	136801553	136804415	-		Hist4h4	ENSMUSG00000096010	histone cluster 4, H4 [Source:MGI Symbol;Acc:MGI:2448443]	1	16.6667	1.66667	0.666667	3.66667		0.06	-4.05889	0.00854301
Rerg	6	137054825	137170497	-		Rerg	ENSMUSG00000030222	RAS-like, estrogen-regulated, growth- inhibitor [Source:MGI Symbol;Acc:MGI:2665139]	47.3333	1.33333	48.6667	5.33333	15.3333		35.5	5.14975	2.94217e-07
Eps8	6	137477245	137654876	-		Eps8	ENSMUSG00000015766	epidermal growth factor receptor pathway substrate 8 [Source:MGI Symbol;Acc:MGI:104684]	204	660	227	229.667	255.333		0.309091	-1.6939	0.00121991
Gm44013	6	140620162	140622423	-		Gm44013	ENSMUSG00000107750	predicted gene, 44013 [Source:MGI Symbol;Acc:MGI:5690405]	80	13.6667	23.6667	35	58.3333		5.85366	2.54934	2.58283e-05
Aebp2	6	140622663	140678472	+		Aebp2	ENSMUSG00000030232	AE binding protein 2 [Source:MGI Symbol;Acc:MGI:1338038]	2362.33	1738.33	4012	4656.67	5089.33		1.35896	0.442508	0.0489726
Slco1a5	6	142234227	142322981	-		Slco1a5	ENSMUSG00000063975	solute carrier organic anion transporter family, member 1a5 [Source:MGI Symbol;Acc:MGI:1351865]	47.3333	0	0.333333	1.66667	20.6667		#DIV/0!	#DIV/0!	8.71958e-07
Kcnj8	6	142564837	142571614	-		Kcnj8	ENSMUSG00000030247	potassium inwardly-rectifying channel, subfamily J, member 8 [Source:MGI Symbol;Acc:MGI:1100508]	41.6667	201	12.6667	25.3333	37.3333		0.207297	-2.27023	0.00106713
Cmas	6	142756686	142775714	+		Cmas	ENSMUSG00000030282	cytidine monophospho-N-acetylneuraminic acid synthetase [Source:MGI Symbol;Acc:MGI:1337124]	515	781.667	1191.67	905.333	962.333		0.658849	-0.601981	0.000863242
Sox5	6	143828425	144781977	-		Sox5	ENSMUSG00000041540	SRY (sex determining region Y)-box 5 [Source:MGI Symbol;Acc:MGI:98367]	231.667	45.3333	287	281.333	47.3333		5.11029	2.35341	0.000529707
Lrmp	6	145115653	145174934	+		Lrmp	ENSMUSG00000030263	lymphoid-restricted membrane protein [Source:MGI Symbol;Acc:MGI:108424]	1002.33	1452	3068.33	2937	4462.33		0.690312	-0.534679	0.0236077
Casc1	6	145174834	145211005	-		Lrmp	ENSMUSG00000030263	lymphoid-restricted membrane protein [Source:MGI Symbol;Acc:MGI:108424]	1060.33	76.3333	96.3333	292	379.667		13.8908	3.79606	6.77938e-19
2010013B24Rik	6	145303152	145308951	+		2010013B24Rik	ENSMUSG00000087277	RIKEN cDNA 2010013B24 gene [Source:MGI Symbol;Acc:MGI:1919329]	6	34	2.33333	2.66667	3.33333		0.176471	-2.5025	0.00380477
Gm44428	6	145304310	145305183	+		2010013B24Rik	ENSMUSG00000087277	RIKEN cDNA 2010013B24 gene [Source:MGI Symbol;Acc:MGI:1919329]	5.66667	45.6667	1.66667	3	6		0.124088	-3.01057	4.2731e-05
Lmntd1	6	145365134	145614319	-		Lmntd1	ENSMUSG00000054966	lamin tail domain containing 1 [Source:MGI Symbol;Acc:MGI:1921321]	0	9	4	5.33333	3.66667		0	#NUM!	0.011851
Sspn	6	145931641	145965223	+		Sspn	ENSMUSG00000030255	sarcospan [Source:MGI Symbol;Acc:MGI:1353511]	524.333	140.667	120.333	108	314.333		3.72749	1.8982	0.0122633
Ints13	6	146549632	146577835	-		Ints13	ENSMUSG00000040250	integrator complex subunit 13 [Source:MGI Symbol;Acc:MGI:1918427]	608	885.333	739.333	618.333	932		0.686747	-0.542149	0.0217096
Tmtc1	6	148232430	148444389	-		Tmtc1	ENSMUSG00000030306	transmembrane and tetratricopeptide repeat containing 1 [Source:MGI Symbol;Acc:MGI:3039590]	7.66667	63	9	3.33333	4.33333		0.121693	-3.03868	5.82472e-05
Dennd5b	6	148988071	149101680	-		Dennd5b	ENSMUSG00000030313	DENN/MADD domain containing 5B [Source:MGI Symbol;Acc:MGI:2444273]	431.333	655.667	587	507	1467		0.657855	-0.604159	0.024233
Amn1	6	149157147	149188712	-		Amn1	ENSMUSG00000068250	antagonist of mitotic exit network 1 [Source:MGI Symbol;Acc:MGI:2442933]	431.333	214	195.333	207.333	326		2.01558	1.01119	0.00100341
Nlrp12	7	3218784	3249740	-		Nlrp12	ENSMUSG00000078817	NLR family, pyrin domain containing 12 [Source:MGI Symbol;Acc:MGI:2676630]	5.33333	31.3333	10.3333	129	0		0.170213	-2.55459	0.00887603
Pirb	7	3711409	3720391	-		Pirb	ENSMUSG00000058818	paired Ig-like receptor B [Source:MGI Symbol;Acc:MGI:894311]	1472.67	1050	2581.67	5500.33	4716		1.40254	0.488042	0.0354175
Gm15448	7	3816781	3825687	-		Gm15448	ENSMUSG00000074419	predicted gene 15448 [Source:MGI Symbol;Acc:MGI:3705216]	242.667	147.333	114.667	273.667	168		1.64706	0.719892	0.0166752
Pira2	7	3836812	3845051	-		Pira2	ENSMUSG00000089942	paired-Ig-like receptor A2 [Source:MGI Symbol;Acc:MGI:1195970]	243.667	155	185.333	355.333	331.667		1.57204	0.652641	0.0211283
Lilra6	7	3908280	3915503	-		Lilra6	ENSMUSG00000030427	leukocyte immunoglobulin-like receptor, subfamily A (with TM domain), member 6 [Source:MGI Symbol;Acc:MGI:1195969]	349	223.333	563	834.667	320		1.56269	0.644028	0.0154304
Lair1	7	4003402	4063204	-		Lair1	ENSMUSG00000055541	leukocyte-associated Ig-like receptor 1 [Source:MGI Symbol;Acc:MGI:105492]	647	1334.33	775.333	1005.67	1524.67		0.484886	-1.04428	0.00015396
Leng8	7	4137039	4148177	+		Leng8	ENSMUSG00000035545	leukocyte receptor cluster (LRC) member 8 [Source:MGI Symbol;Acc:MGI:2142195]	2200	1611.33	2865.33	3001.67	6676.33		1.36533	0.449248	0.00348686
Ncr1	7	4337724	4345164	+		Ncr1	ENSMUSG00000062524	natural cytotoxicity triggering receptor 1 [Source:MGI Symbol;Acc:MGI:1336212]	16.6667	785	86.6667	64.6667	106.667		0.0212314	-5.55766	1.42e-43
Eps8l1	7	4460674	4480487	+		Gm15494	ENSMUSG00000091177	predicted gene 15494 [Source:MGI Symbol;Acc:MGI:3782940]	7.33333	311	10.6667	31	630		0.0235799	-5.4063	4.03155e-31
Tmem150b	7	4706832	4725249	-		Brsk1	ENSMUSG00000035390	BR serine/threonine kinase 1 [Source:MGI Symbol;Acc:MGI:2685946]	53.3333	111.667	26	20.6667	26		0.477612	-1.06609	0.0125397
Ube2s	7	4794546	4812590	-		Rpl28	ENSMUSG00000030432	ribosomal protein L28 [Source:MGI Symbol;Acc:MGI:101839]	98	191	552.667	401	371.333		0.513089	-0.962719	0.000272322
Zfp329	7	12804977	12818858	-		Zfp329	ENSMUSG00000057894	zinc finger protein 329 [Source:MGI Symbol;Acc:MGI:1921283]	627.333	418.667	329	301.333	758		1.49841	0.58343	0.027964
Zfp128	7	12881177	12893422	+		Zfp128	ENSMUSG00000060397	zinc finger protein 128 [Source:MGI Symbol;Acc:MGI:2389445]	212.333	102.667	127.667	117.667	172		2.06818	1.04836	0.000368009
6330408A02Rik	7	13258967	13278721	-		6330408A02Rik	ENSMUSG00000070814	RIKEN cDNA 6330408A02 gene [Source:MGI Symbol;Acc:MGI:2447816]	175.333	85	161.667	136	177		2.06275	1.04457	0.000632883
Ehd2	7	15946958	15967567	-		Ehd2	ENSMUSG00000074364	EH-domain containing 2 [Source:MGI Symbol;Acc:MGI:2154274]	374	152.667	493.667	475	464.333		2.44978	1.29265	0.000147353
Slc8a2	7	16129826	16161063	+		Slc8a2	ENSMUSG00000030376	solute carrier family 8 (sodium/calcium exchanger), member 2 [Source:MGI Symbol;Acc:MGI:107996]	11.6667	76.6667	4.33333	65.6667	8		0.152174	-2.71621	0.00136777
C5ar2	7	16234585	16244154	-		C5ar2	ENSMUSG00000074361	complement component 5a receptor 2 [Source:MGI Symbol;Acc:MGI:2442013]	263	101.667	30.3333	55.3333	188		2.58689	1.37122	0.012866
C5ar1	7	16246743	16259540	-		C5ar1	ENSMUSG00000049130	complement component 5a receptor 1 [Source:MGI Symbol;Acc:MGI:88232]	630.667	217.667	457.333	1275.67	521		2.8974	1.53476	0.00644772
Ceacam15	7	16671331	16675705	-		Ceacam15	ENSMUSG00000078795	carcinoembryonic antigen-related cell adhesion molecule 15 [Source:MGI Symbol;Acc:MGI:2141810]	312	2	22.3333	299	132.667		156	7.2854	2.28453e-23
Slc1a5	7	16781340	16798274	+		Slc1a5	ENSMUSG00000001918	solute carrier family 1 (neutral amino acid transporter), member 5 [Source:MGI Symbol;Acc:MGI:105305]	968.667	1382.67	2615	2294.33	4433.33		0.700579	-0.513381	0.000869804
Dact3	7	16875317	16887462	+		Dact3	ENSMUSG00000078794	dishevelled-binding antagonist of beta- catenin 3 [Source:MGI Symbol;Acc:MGI:3654828]	69	23.6667	30	79.3333	69		2.91549	1.54374	0.00250355
Pglyrp1	7	18871331	18890459	+		Pglyrp1	ENSMUSG00000030413	peptidoglycan recognition protein 1 [Source:MGI Symbol;Acc:MGI:1345092]	102.333	317.333	740.333	3705.67	274.667		0.322479	-1.63272	6.70283e-11
Dmpk	7	19083849	19093821	+		Dmpk	ENSMUSG00000030409	dystrophia myotonica-protein kinase [Source:MGI Symbol;Acc:MGI:94906]	849.667	350	226.333	212	1192.33		2.42762	1.27954	0.000283326
Gpr4	7	19212538	19224174	+		Gpr4	ENSMUSG00000044317	G protein-coupled receptor 4 [Source:MGI Symbol;Acc:MGI:2441992]	29.3333	120.333	50.3333	96.3333	74.3333		0.243767	-2.03642	2.36342e-06
Fosb	7	19302696	19310051	-		Fosb	ENSMUSG00000003545	FBJ osteosarcoma oncogene B [Source:MGI Symbol;Acc:MGI:95575]	27	2017	29	16.6667	35.6667		0.0133862	-6.22311	0
Relb	7	19606217	19629438	-		Relb	ENSMUSG00000002983	avian reticuloendotheliosis viral (v-rel) oncogene related B [Source:MGI Symbol;Acc:MGI:103289]	1954	1055.33	7552	8464.33	11048.7		1.85155	0.888732	1.38696e-09
Gm19345	7	19852003	19858350	+		Gm19345	ENSMUSG00000092216	predicted gene, 19345 [Source:MGI Symbol;Acc:MGI:5011530]	79.6667	32.6667	124.667	138	73		2.43878	1.28616	0.00226412
Ceacam16	7	19852097	19861299	-		Gm19345	ENSMUSG00000092216	predicted gene, 19345 [Source:MGI Symbol;Acc:MGI:5011530]	155	71.3333	315	374.667	176.333		2.1729	1.11962	0.000173033
Pvr	7	19903578	19921160	-		Pvr	ENSMUSG00000040511	poliovirus receptor [Source:MGI Symbol;Acc:MGI:107741]	850.667	445.333	692	1042.33	842.333		1.91018	0.933708	0.0127741
Zfp111	7	24193947	24211443	-		Zfp111	ENSMUSG00000087598	zinc finger protein 111 [Source:MGI Symbol;Acc:MGI:1929114]	224.667	54	82.6667	81.3333	129.333		4.16049	2.05675	1.1793e-05
Kcnn4	7	24370263	24386690	+		Kcnn4	ENSMUSG00000054342	potassium intermediate/small conductance calcium-activated channel, subfamily N, member 4 [Source:MGI Symbol;Acc:MGI:1277957]	304	798	1031.33	692.333	743		0.380952	-1.39232	2.10577e-05
Plaur	7	24462484	24475968	+		Plaur	ENSMUSG00000046223	plasminogen activator, urokinase receptor [Source:MGI Symbol;Acc:MGI:97612]	337	872	1667.67	2053	951.667		0.386468	-1.37158	9.25657e-15
Cd177	7	24743983	24760311	-		Cd177	ENSMUSG00000052212	CD177 antigen [Source:MGI Symbol;Acc:MGI:1916141]	11.6667	91.6667	263.667	2298.33	12.3333		0.127273	-2.974	5.70139e-11
Atp1a3	7	24978167	25005958	-		Atp1a3	ENSMUSG00000040907	ATPase, Na+/K+ transporting, alpha 3 polypeptide [Source:MGI Symbol;Acc:MGI:88107]	384	578.667	375	705	473		0.663594	-0.591626	0.00761785
Pou2f2	7	25087344	25179726	-		Pou2f2	ENSMUSG00000008496	POU domain, class 2, transcription factor 2 [Source:MGI Symbol;Acc:MGI:101897]	2763	1831.67	5490.67	5806	5455.67		1.50846	0.593079	0.0231158
Dedd2	7	25199915	25220615	-		Dedd2	ENSMUSG00000054499	death effector domain-containing DNA binding protein 2 [Source:MGI Symbol;Acc:MGI:1914629]	616.667	1355.67	1530.67	1852.67	1544.33		0.454881	-1.13644	2.29549e-05
Erf	7	25242561	25250761	-		Erf	ENSMUSG00000040857	Ets2 repressor factor [Source:MGI Symbol;Acc:MGI:109637]	211.333	426.667	391.333	317	545.333		0.495312	-1.01359	0.0113455
Megf8	7	25317164	25365917	+		Megf8	ENSMUSG00000045039	multiple EGF-like-domains 8 [Source:MGI Symbol;Acc:MGI:2446294]	439	126.667	443.667	376	594.333		3.46579	1.79318	0.0001088
Lipe	7	25379527	25398710	-		4732471J01Rik	ENSMUSG00000053714	RIKEN cDNA 4732471J01 gene [Source:MGI Symbol;Acc:MGI:3603586]	722.667	420	1124.33	1179	1420		1.72063	0.782941	0.000304783
Cyp2s1	7	25802475	25816913	-		Cyp2s1	ENSMUSG00000040703	cytochrome P450, family 2, subfamily s, polypeptide 1 [Source:MGI Symbol;Acc:MGI:1921384]	7	34	8.66667	6.33333	39.3333		0.205882	-2.28011	0.021915
Coq8b	7	27233023	27257950	+		Coq8b	ENSMUSG00000003762	coenzyme Q8B [Source:MGI Symbol;Acc:MGI:1924139]	541	255.333	1567.33	1837	950.667		2.1188	1.08325	0.000243188
Gm15567	7	27249263	27257932	-		Coq8b	ENSMUSG00000003762	coenzyme Q8B [Source:MGI Symbol;Acc:MGI:1924139]	102.333	44.6667	236.667	277.333	151.333		2.29104	1.19601	0.00870753
Plekhg2	7	28359604	28372599	-		Plekhg2	ENSMUSG00000037552	pleckstrin homology domain containing, family G (with RhoGef domain) member 2 [Source:MGI Symbol;Acc:MGI:2141874]	1969.67	945	1452	2082.67	4137		2.0843	1.05957	0.000338852
Zfp36	7	28376784	28380253	-		Zfp36	ENSMUSG00000044786	zinc finger protein 36 [Source:MGI Symbol;Acc:MGI:99180]	1535.67	2730.33	5825	7799.33	10586.3		0.562447	-0.830212	0.000669718
Nccrp1	7	28543596	28547254	-		Samd4b	ENSMUSG00000109336	sterile alpha motif domain containing 4B [Source:MGI Symbol;Acc:MGI:2448542]	55	19.6667	9.66667	78	19.3333		2.79661	1.48368	0.0299512
Fbxo17	7	28716804	28738144	+		Fbxo17	ENSMUSG00000030598	F-box protein 17 [Source:MGI Symbol;Acc:MGI:1354707]	14	51.6667	88.6667	28.6667	35.3333		0.270968	-1.88381	0.0389395
Rinl	7	28788969	28798963	+		Rinl	ENSMUSG00000051735	Ras and Rab interactor-like [Source:MGI Symbol;Acc:MGI:2444024]	608	1022.33	1358	1311.67	1101.67		0.594718	-0.749722	0.00445825
Ryr1	7	29003344	29125179	-		Ryr1	ENSMUSG00000030592	ryanodine receptor 1, skeletal muscle [Source:MGI Symbol;Acc:MGI:99659]	22.6667	177.667	115.667	84.3333	115.667		0.12758	-2.97053	9.97031e-14
Rasgrp4	7	29134851	29153961	+		Rasgrp4	ENSMUSG00000030589	RAS guanyl releasing protein 4 [Source:MGI Symbol;Acc:MGI:2386851]	451	749.333	508.667	1534.67	763		0.601868	-0.73248	0.00341841
Spred3	7	29158829	29170411	-		Spred3	ENSMUSG00000037239	sprouty-related, EVH1 domain containing 3 [Source:MGI Symbol;Acc:MGI:2142186]	170.333	51.3333	59.3333	44.6667	127.667		3.31818	1.73039	0.00752844
Catsperg1	7	29181321	29214035	-		Catsperg1	ENSMUSG00000049676	cation channel sperm associated auxiliary subunit gamma 1 [Source:MGI Symbol;Acc:MGI:2443617]	447.667	25.6667	98.6667	135.667	487.667		17.4416	4.12446	6.43168e-22
Kcnk6	7	29221926	29232515	-		Kcnk6	ENSMUSG00000046410	potassium inwardly-rectifying channel, subfamily K, member 6 [Source:MGI Symbol;Acc:MGI:1891291]	1504.33	619	1192.67	1609.33	2344.67		2.43026	1.28111	3.33928e-15
2200002D01Rik	7	29246561	29248466	-		Yif1b	ENSMUSG00000030588	Yip1 interacting factor homolog B (S. cerevisiae) [Source:MGI Symbol;Acc:MGI:1924504]	134.667	69	193.667	329.333	316.333		1.95169	0.964725	0.0401899
Ppp1r14a	7	29289308	29293801	+		Ppp1r14a	ENSMUSG00000037166	protein phosphatase 1, regulatory (inhibitor) subunit 14A [Source:MGI Symbol;Acc:MGI:1931139]	3	62.6667	7.66667	3.33333	14.6667		0.0478723	-4.38466	1.2273e-05
Sipa1l3	7	29320372	29518641	-		Sipa1l3	ENSMUSG00000030583	signal-induced proliferation-associated 1 like 3 [Source:MGI Symbol;Acc:MGI:1921456]	781.333	360.333	785	913	1123.67		2.16836	1.11661	0.0034959
Alkbh6	7	30308717	30314304	+		Alkbh6	ENSMUSG00000042831	alkB homolog 6 [Source:MGI Symbol;Acc:MGI:2142037]	465.667	292	819	889.333	976.667		1.59475	0.673329	0.000508511
Hcst	7	30417712	30419854	-		Hcst	ENSMUSG00000064109	hematopoietic cell signal transducer [Source:MGI Symbol;Acc:MGI:1344360]	103.333	258.667	414.667	480.333	286		0.399485	-1.32379	4.208e-06
Nfkbid	7	30421732	30428746	+		Nfkbid	ENSMUSG00000036931	nuclear factor of kappa light polypeptide gene enhancer in B cells inhibitor, delta [Source:MGI Symbol;Acc:MGI:3041243]	556.333	914.333	1680.33	1866.33	2020.33		0.608458	-0.716771	0.000132752
Zbtb32	7	30589681	30598909	-		Zbtb32	ENSMUSG00000006310	zinc finger and BTB domain containing 32 [Source:MGI Symbol;Acc:MGI:1891838]	812	251.333	2653.33	2883.33	393.667		3.23077	1.69188	0.000978352
2200002J24Rik	7	30698926	30700536	+		2200002J24Rik	ENSMUSG00000013083	RIKEN cDNA 2200002J24 gene [Source:MGI Symbol;Acc:MGI:1916397]	7.66667	0	16	23.6667	0		#DIV/0!	#DIV/0!	0.0196155
Ffar2	7	30818348	30823775	-		Ffar2	ENSMUSG00000051314	free fatty acid receptor 2 [Source:MGI Symbol;Acc:MGI:2441731]	69	374	128	515	35.3333		0.184492	-2.43837	0.0087161
Ffar1	7	30857390	30861564	-		Ffar1	ENSMUSG00000044453	free fatty acid receptor 1 [Source:MGI Symbol;Acc:MGI:2684079]	149.333	347.667	271.333	280.333	872		0.42953	-1.21917	1.97446e-08
Gm4673	7	30956909	30961619	+		Gm17077	ENSMUSG00000090357	predicted gene 17077 [Source:MGI Symbol;Acc:MGI:4937904]	252.667	126.667	271.667	338.333	286.667		1.99474	0.996198	0.00137659
Lsr	7	30957770	30973464	-		Gm17077	ENSMUSG00000090357	predicted gene 17077 [Source:MGI Symbol;Acc:MGI:4937904]	307	145	364.333	460	318.333		2.11724	1.08219	0.000157944
Fam187b	7	30973790	30989726	+		Fam187b	ENSMUSG00000046826	family with sequence similarity 187, member B [Source:MGI Symbol;Acc:MGI:1923665]	30.3333	5.33333	10.3333	9.66667	11.6667		5.6875	2.50779	0.00781416
Gramd1a	7	31130127	31155896	-		Gramd1a	ENSMUSG00000001248	GRAM domain containing 1A [Source:MGI Symbol;Acc:MGI:105490]	1630.33	2224.33	2269.33	2986	6166.67		0.732954	-0.448206	0.0460416
Kctd15	7	34639014	34656732	-		Kctd15	ENSMUSG00000030499	potassium channel tetramerisation domain containing 15 [Source:MGI Symbol;Acc:MGI:2385276]	4.66667	34.3333	6.66667	9	9.33333		0.135922	-2.87915	0.00842719
Nudt19	7	35547185	35556304	-		Nudt19	ENSMUSG00000034875	nudix (nucleoside diphosphate linked moiety X)-type motif 19 [Source:MGI Symbol;Acc:MGI:94203]	224.667	357	477	447.667	472.333		0.629318	-0.668138	0.0354409
Tshz3	7	36698118	36773553	+		Tshz3	ENSMUSG00000021217	teashirt zinc finger family member 3 [Source:MGI Symbol;Acc:MGI:2442819]	25	83.6667	33.3333	12.3333	14.3333		0.298805	-1.74272	0.00130738
Plekhf1	7	38216972	38228016	-		Plekhf1	ENSMUSG00000074170	pleckstrin homology domain containing, family F (with FYVE domain) member 1 [Source:MGI Symbol;Acc:MGI:1919537]	16.6667	48	12.6667	12.6667	15.6667		0.347222	-1.52607	0.00843407
Zfp141	7	42473386	42505740	-		Zfp141	ENSMUSG00000092416	zinc finger protein 141 [Source:MGI Symbol;Acc:MGI:3584269]	302.333	450.333	435.333	342.667	356.333		0.671355	-0.574853	0.00572084
Nkg7	7	43437073	43438249	+		Nkg7	ENSMUSG00000004612	natural killer cell group 7 sequence [Source:MGI Symbol;Acc:MGI:1931250]	50.3333	759	190	142	245.667		0.0663153	-3.91451	1.15228e-18
Cldnd2	7	43440782	43443334	+		Cldnd2	ENSMUSG00000038973	claudin domain containing 2 [Source:MGI Symbol;Acc:MGI:1921526]	0	17	0	0	0.666667		0	#NUM!	0.000416717
Zfp658	7	43562256	43575461	+		Zfp658	ENSMUSG00000056592	zinc finger protein 658 [Source:MGI Symbol;Acc:MGI:2652821]	118.667	274	103	98.6667	170.333		0.43309	-1.20726	0.000354934
Siglece	7	43651070	43660161	-		Siglece	ENSMUSG00000030474	sialic acid binding Ig-like lectin E [Source:MGI Symbol;Acc:MGI:1932475]	291.667	485.667	109	692.667	203		0.600549	-0.735646	0.0172586
Klk8	7	43797577	43803826	+		2310002F09Rik	ENSMUSG00000097178	RIKEN cDNA 2310002F09 gene [Source:MGI Symbol;Acc:MGI:1916779]	24	194.667	104.667	107	90		0.123288	-3.0199	3.99639e-07
Klk1b27	7	44052290	44056712	+		Klk1b27	ENSMUSG00000063177	kallikrein 1-related peptidase b27 [Source:MGI Symbol;Acc:MGI:891980]	9	74.3333	64	74.6667	69.3333		0.121076	-3.04601	0.00967136
Klk1	7	44225360	44229618	+		Gm10109	ENSMUSG00000062073	predicted gene 10109 [Source:MGI Symbol;Acc:MGI:3647742]	61	196.667	532.667	227.667	347.667		0.310169	-1.68887	0.0450818
Shank1	7	44310253	44360572	+		Shank1	ENSMUSG00000038738	SH3/ankyrin domain gene 1 [Source:MGI Symbol;Acc:MGI:3613677]	118.667	57.3333	377.667	189	228		2.06977	1.04947	0.00913953
Il4i1	7	44816387	44840809	+		Atf5	ENSMUSG00000038539	activating transcription factor 5 [Source:MGI Symbol;Acc:MGI:2141857]	2859.33	816	6973.67	11012.7	15869.3		3.50408	1.80904	1.25568e-27
Tbc1d17	7	44834623	44849079	-		Il4i1	ENSMUSG00000074141	interleukin 4 induced 1 [Source:MGI Symbol;Acc:MGI:109552]	4343	1474.67	8554	12857.7	18999.3		2.94507	1.5583	2.69687e-34
Ptov1	7	44863067	44869788	-		Ptov1	ENSMUSG00000038502	prostate tumor over expressed gene 1 [Source:MGI Symbol;Acc:MGI:1933946]	528.667	308	544.333	724	749		1.71645	0.779428	0.0216268
D7Bwg0826e	7	44894305	44898099	-		D7Bwg0826e	ENSMUSG00000109198	DNA segment, Chr 7, Brigham & Women's Genetics 0826 expressed [Source:MGI Symbol;Acc:MGI:106455]	240	142	232	242.333	267.667		1.69014	0.757143	0.0387542
Fuz	7	44896079	44902631	+		D7Bwg0826e	ENSMUSG00000109198	DNA segment, Chr 7, Brigham & Women's Genetics 0826 expressed [Source:MGI Symbol;Acc:MGI:106455]	867	395.667	937.667	1160.33	1298.67		2.19124	1.13175	2.07157e-07
Prrg2	7	45053584	45062677	-		Prrg2	ENSMUSG00000007837	proline-rich Gla (G-carboxyglutamic acid) polypeptide 2 [Source:MGI Symbol;Acc:MGI:1929596]	178	80.3333	223	265.667	251.333		2.21577	1.14781	0.0058335
Gm45552	7	45121917	45124144	+		Gm45552	ENSMUSG00000110279	predicted gene 45552 [Source:MGI Symbol;Acc:MGI:5791388]	191.333	350	4154.67	4750.67	3535.67		0.546667	-0.871267	0.00972153
Flt3l	7	45129788	45136432	-		Gm45713	ENSMUSG00000089989	predicted gene 45713 [Source:MGI Symbol;Acc:MGI:5804828]	240	479	630.667	694.667	707		0.501044	-0.996991	0.00209891
Dhdh	7	45470987	45488805	-		Gm45808	ENSMUSG00000109926	predicted gene 45808 [Source:MGI Symbol;Acc:MGI:5804923]	268.667	124.667	220	173.333	176.667		2.15508	1.10774	0.0343888
Ppp1r15a	7	45522916	45526268	-		Tulp2	ENSMUSG00000023467	tubby-like protein 2 [Source:MGI Symbol;Acc:MGI:1861600]	947.333	1759.33	2766	3656.33	2095		0.538461	-0.893085	0.000510159
Rasip1	7	45627488	45639093	+		Izumo1	ENSMUSG00000064158	izumo sperm-egg fusion 1 [Source:MGI Symbol;Acc:MGI:1920706]	178.333	39	219.667	252	230.333		4.57265	2.19303	9.99101e-05
A030001D20Rik	7	45635680	45638765	-		Rasip1	ENSMUSG00000044562	Ras interacting protein 1 [Source:MGI Symbol;Acc:MGI:1917153]	73	19	62.6667	73.6667	82.6667		3.84211	1.9419	0.00338373
Mamstr	7	45639977	45646521	+		Mamstr	ENSMUSG00000042918	MEF2 activating motif and SAP domain containing transcriptional regulator [Source:MGI Symbol;Acc:MGI:1921740]	46.6667	2.66667	17.3333	23.3333	20.6667		17.5	4.12928	9.21001e-06
Gm45441	7	45830895	45835249	+		Grwd1	ENSMUSG00000053801	glutamate-rich WD repeat containing 1 [Source:MGI Symbol;Acc:MGI:2141989]	15.6667	1.33333	3.66667	10.3333	12		11.75	3.55459	0.0266446
Grin2d	7	45831883	45878378	-		Gm45441	ENSMUSG00000110020	predicted gene 45441 [Source:MGI Symbol;Acc:MGI:5791277]	37.3333	9.66667	12.3333	19.3333	24		3.86207	1.94937	0.0125397
Abcc6	7	45967555	46030302	-		Abcc6	ENSMUSG00000030834	ATP-binding cassette, sub-family C (CFTR/MRP), member 6 [Source:MGI Symbol;Acc:MGI:1351634]	12.3333	0	0.666667	1.33333	0.666667		#DIV/0!	#DIV/0!	0.00107079
Tmem86a	7	47050601	47054777	+		Tmem86a	ENSMUSG00000010307	transmembrane protein 86A [Source:MGI Symbol;Acc:MGI:1915143]	572.333	412	845.667	765	1440.67		1.38916	0.474211	0.0450953
Nav2	7	48908716	49610090	+		Gm2788	ENSMUSG00000085995	predicted gene 2788 [Source:MGI Symbol;Acc:MGI:3780956]	279.333	48.6667	116	117.667	294.333		5.73973	2.52098	1.10476e-05
Cyfip1	7	55841745	55932602	+		Cyfip1	ENSMUSG00000030447	cytoplasmic FMR1 interacting protein 1 [Source:MGI Symbol;Acc:MGI:1338801]	2778	1615.33	5070.33	5554	4378.67		1.71977	0.782215	0.000889296
9330162G02Rik	7	59223847	59254788	-		9330162G02Rik	ENSMUSG00000109536	RIKEN cDNA 9330162G02 gene [Source:MGI Symbol;Acc:MGI:2442217]	76.6667	160.667	109	87.6667	153.333		0.477178	-1.0674	0.000118548
Gm32633	7	64001885	64020959	+		Gm32633	ENSMUSG00000108393	predicted gene, 32633 [Source:MGI Symbol;Acc:MGI:5591792]	9	91.6667	32.3333	12.3333	44		0.0981818	-3.3484	2.5483e-05
Trpm1	7	64153835	64269775	+		Trpm1	ENSMUSG00000030523	transient receptor potential cation channel, subfamily M, member 1 [Source:MGI Symbol;Acc:MGI:1330305]	3.33333	36.3333	2.66667	3	9		0.0917431	-3.44626	0.0213098
Fan1	7	64346758	64374095	-		Fan1	ENSMUSG00000033458	FANCD2/FANCI-associated nuclease 1 [Source:MGI Symbol;Acc:MGI:3045266]	201.667	93	159	117	149		2.16846	1.11667	0.00319562
Fam189a1	7	64756091	65156570	-		Fam189a1	ENSMUSG00000030518	family with sequence similarity 189, member A1 [Source:MGI Symbol;Acc:MGI:1917888]	20.6667	0.333333	5.66667	3.66667	14.3333		62	5.9542	0.0111556
Nsmce3	7	64867052	64872997	-		Fam189a1	ENSMUSG00000030518	family with sequence similarity 189, member A1 [Source:MGI Symbol;Acc:MGI:1917888]	504	287.333	795	1018	1411.67		1.75406	0.810698	0.00256189
Tarsl2	7	65644898	65692091	+		Tarsl2	ENSMUSG00000030515	threonyl-tRNA synthetase-like 2 [Source:MGI Symbol;Acc:MGI:2444486]	82	188	57.6667	50.6667	101.667		0.43617	-1.19704	0.0108156
Chsy1	7	66109515	66173798	+		Gm26827	ENSMUSG00000097634	predicted gene, 26827 [Source:MGI Symbol;Acc:MGI:5477321]	723.667	1740	2010.33	1809.33	1229.33		0.4159	-1.26569	9.06658e-08
Lrrk1	7	66226912	66388350	-		Lrrk1	ENSMUSG00000015133	leucine-rich repeat kinase 1 [Source:MGI Symbol;Acc:MGI:2142227]	2799	1366	3958.67	3558	5271		2.04905	1.03495	7.92457e-08
Lins1	7	66689889	66717256	+		Lins1	ENSMUSG00000053091	lines homolog 1 [Source:MGI Symbol;Acc:MGI:1919885]	170.667	259	190.667	209.667	190.667		0.658945	-0.601771	0.04145
Pgpep1l	7	68236610	68264233	-		Pgpep1l	ENSMUSG00000030553	pyroglutamyl-peptidase I-like [Source:MGI Symbol;Acc:MGI:1925694]	53	21	143	158.333	103.333		2.52381	1.3356	0.0368685
Mctp2	7	72077830	72306608	-		Mctp2	ENSMUSG00000032776	multiple C2 domains, transmembrane 2 [Source:MGI Symbol;Acc:MGI:2685335]	337.667	735.333	409.667	355	704		0.459202	-1.1228	5.24536e-06
1810026B05Rik	7	73539203	73558395	-		Chd2	ENSMUSG00000078671	chromodomain helicase DNA binding protein 2 [Source:MGI Symbol;Acc:MGI:2448567]	592.333	928.667	944.667	1197.33	1596.33		0.637832	-0.648752	0.00897716
AU020206	7	75769038	75782099	-		AU020206	ENSMUSG00000097415	expressed sequence AU020206 [Source:MGI Symbol;Acc:MGI:2142134]	1773.33	1076.67	4969.67	5355.67	3899.33		1.64706	0.719892	0.0163933
Isg20	7	78913424	78920396	+		Isg20	ENSMUSG00000039236	interferon-stimulated protein [Source:MGI Symbol;Acc:MGI:1928895]	159	308	1715	1375.67	436		0.516234	-0.953904	0.0309647
Mfge8	7	79133768	79149060	-		Mfge8	ENSMUSG00000030605	milk fat globule-EGF factor 8 protein [Source:MGI Symbol;Acc:MGI:102768]	378	225.333	992.667	401.667	567.667		1.67751	0.746326	0.0145749
Gm44950	7	79922572	79924867	-		Gm44950	ENSMUSG00000108350	predicted gene 44950 [Source:MGI Symbol;Acc:MGI:5753526]	124	17.6667	52.6667	46.6667	85.3333		7.01887	2.81124	0.000477305
Arpin	7	79925361	79935359	-		Arpin	ENSMUSG00000039043	actin-related protein 2/3 complex inhibitor [Source:MGI Symbol;Acc:MGI:1917670]	549.667	108	518	596.667	866		5.08951	2.34753	0.000242559
Whamm	7	81571266	81596836	+		Whamm	ENSMUSG00000045795	WAS protein homolog associated with actin, golgi membranes and microtubules [Source:MGI Symbol;Acc:MGI:2142282]	391.667	547.333	629.667	650.667	734.333		0.715591	-0.482793	0.0120527
Homer2	7	81600481	81707527	-		Homer2	ENSMUSG00000025813	homer scaffolding protein 2 [Source:MGI Symbol;Acc:MGI:1347354]	3.33333	21.3333	61.3333	2.66667	0.333333		0.15625	-2.67807	0.00618993
Hdgfl3	7	81881251	81934473	-		Tm6sf1	ENSMUSG00000038623	transmembrane 6 superfamily member 1 [Source:MGI Symbol;Acc:MGI:1933209]	411.667	640.333	1110.67	1113	793		0.642894	-0.637346	0.00319279
Saxo2	7	82632960	82648528	-		Saxo2	ENSMUSG00000038570	stabilizer of axonemal microtubules 2 [Source:MGI Symbol;Acc:MGI:1914618]	273.333	7	153.333	167.333	7.66667		39.0476	5.28716	3.5633e-18
Efl1	7	82648614	82777852	+		Efl1	ENSMUSG00000038563	elongation factor like GPTase 1 [Source:MGI Symbol;Acc:MGI:2141969]	734	453	708.667	638	600.333		1.62031	0.696269	0.0265299
Fah	7	84585159	84606722	-		Fah	ENSMUSG00000030630	fumarylacetoacetate hydrolase [Source:MGI Symbol;Acc:MGI:95482]	203	84.6667	434	518.333	177.667		2.39764	1.26161	9.43975e-05
Gm44751	7	88311478	88315864	+		Gm44751	ENSMUSG00000109244	predicted gene 44751 [Source:MGI Symbol;Acc:MGI:5753327]	55	107.667	42	39	65.6667		0.510836	-0.969068	0.0370435
E230029C05Rik	7	89980723	90049069	+		Eed	ENSMUSG00000030619	embryonic ectoderm development [Source:MGI Symbol;Acc:MGI:95286]	289.667	169.667	118	77.6667	148.333		1.70727	0.77169	0.00542845
Gm45223	7	90132492	90137629	+		Picalm	ENSMUSG00000039361	phosphatidylinositol binding clathrin assembly protein [Source:MGI Symbol;Acc:MGI:2385902]	3.66667	24.3333	2.33333	1.66667	4.66667		0.150685	-2.73039	0.0100503
Gm45222	7	90145948	90150254	+		Picalm	ENSMUSG00000039361	phosphatidylinositol binding clathrin assembly protein [Source:MGI Symbol;Acc:MGI:2385902]	23	64	11.3333	12.6667	19.6667		0.359375	-1.47644	0.00324866
Sytl2	7	90302252	90410719	+		Sytl2	ENSMUSG00000030616	synaptotagmin-like 2 [Source:MGI Symbol;Acc:MGI:1933366]	82.6667	724.667	18.6667	18.6667	74		0.114075	-3.13194	2.46998e-14
Dlg2	7	91090706	92449247	+		Dlg2	ENSMUSG00000052572	discs, large homolog 2 (Drosophila) [Source:MGI Symbol;Acc:MGI:1344351]	35.3333	188.667	18.6667	12.6667	11.3333		0.187279	-2.41674	5.09798e-12
6430511E19Rik	7	92639949	92643783	+		Gm26944	ENSMUSG00000098066	predicted gene, 26944 [Source:MGI Symbol;Acc:MGI:5504059]	68.3333	24.6667	19.6667	26.6667	65		2.77027	1.47003	0.0445977
Rab30	7	92741603	92844535	+		Rab30	ENSMUSG00000030643	RAB30, member RAS oncogene family [Source:MGI Symbol;Acc:MGI:1923235]	296.333	578.667	370.667	369.667	807		0.512097	-0.965512	0.025065
Gab2	7	97081586	97308946	+		Gab2	ENSMUSG00000004508	growth factor receptor bound protein 2- associated protein 2 [Source:MGI Symbol;Acc:MGI:1333854]	1401.67	804.333	675	745	985.333		1.74264	0.801278	0.0107728
Usp35	7	97309380	97332020	-		Usp35	ENSMUSG00000035713	ubiquitin specific peptidase 35 [Source:MGI Symbol;Acc:MGI:2685339]	333.667	201.667	190.333	261	360.333		1.65455	0.726435	0.00651061
Kctd21	7	97332327	97350213	+		Kctd21	ENSMUSG00000044952	potassium channel tetramerisation domain containing 21 [Source:MGI Symbol;Acc:MGI:3643121]	265.333	143.667	144	140.667	210.667		1.84687	0.885081	0.000598588
Pak1	7	97788541	97912381	+		Pak1	ENSMUSG00000030774	p21 protein (Cdc42/Rac)-activated kinase 1 [Source:MGI Symbol;Acc:MGI:1339975]	458.333	941.333	338.667	326.667	420.667		0.486898	-1.03831	2.64944e-09
Capn5	7	98121559	98178274	-		Capn5	ENSMUSG00000035547	calpain 5 [Source:MGI Symbol;Acc:MGI:1100859]	138.667	332.333	410	284	364.667		0.417252	-1.26101	7.8698e-05
Omp	7	98143359	98145502	-		Capn5	ENSMUSG00000035547	calpain 5 [Source:MGI Symbol;Acc:MGI:1100859]	0.333333	14.6667	45.3333	6	13		0.0227273	-5.45943	0.00455885
Acer3	7	98206389	98321208	-		Acer3	ENSMUSG00000030760	alkaline ceramidase 3 [Source:MGI Symbol;Acc:MGI:1913440]	567.333	856.333	623	322.667	569.667		0.662515	-0.593976	0.00157416
Lrrc32	7	98489283	98502181	+		Lrrc32	ENSMUSG00000090958	leucine rich repeat containing 32 [Source:MGI Symbol;Acc:MGI:93882]	406	88.3333	335.333	274.333	103.667		4.59623	2.20045	3.8281e-12
Wnt11	7	98835112	98855195	+		Wnt11	ENSMUSG00000015957	wingless-type MMTV integration site family, member 11 [Source:MGI Symbol;Acc:MGI:101948]	272	50.3333	139.333	193	224.333		5.40397	2.43402	0.00221798
Dgat2	7	99153658	99182719	-		Dgat2	ENSMUSG00000030747	diacylglycerol O-acyltransferase 2 [Source:MGI Symbol;Acc:MGI:1915050]	309.667	150	88.3333	225	61.3333		2.06444	1.04575	0.00807253
Tpbgl	7	99624082	99627103	-		Tpbgl	ENSMUSG00000096606	trophoblast glycoprotein-like [Source:MGI Symbol;Acc:MGI:3646425]	223	49.3333	55.3333	50	251.333		4.52027	2.17641	0.00254136
Kcne3	7	100176502	100184869	+		Gm34821	ENSMUSG00000109186	predicted gene, 34821 [Source:MGI Symbol;Acc:MGI:5593980]	8.66667	40.6667	0	1	6.66667		0.213115	-2.2303	0.00341479
Fam168a	7	100706635	100841656	+		Fam168a	ENSMUSG00000029461	family with sequence similarity 168, member A [Source:MGI Symbol;Acc:MGI:2442372]	1358.67	884.333	1525	1332.33	1203.33		1.53637	0.619529	0.0168357
Arhgef17	7	100869752	100932107	-		Arhgef17	ENSMUSG00000032875	Rho guanine nucleotide exchange factor (GEF) 17 [Source:MGI Symbol;Acc:MGI:2673002]	22.6667	5.66667	27	25.3333	3		4	2	0.0379425
Inppl1	7	101822632	101838229	-		Phox2a	ENSMUSG00000007946	paired-like homeobox 2a [Source:MGI Symbol;Acc:MGI:106633]	841	518.333	851	743.333	1318.67		1.62251	0.698226	0.0101434
Gm10602	7	101836503	101842771	+		Inppl1	ENSMUSG00000032737	inositol polyphosphate phosphatase-like 1 [Source:MGI Symbol;Acc:MGI:1333787]	179.667	43.6667	81.3333	86.6667	190		4.1145	2.04072	2.88732e-08
Folr2	7	101839988	101857194	-		Gm10602	ENSMUSG00000073985	predicted gene 10602 [Source:MGI Symbol;Acc:MGI:3708759]	136.333	9	22.6667	35.6667	95.6667		15.1481	3.92107	2.07605e-13
Il18bp	7	102014885	102018690	-		Numa1	ENSMUSG00000066306	nuclear mitotic apparatus protein 1 [Source:MGI Symbol;Acc:MGI:2443665]	556.333	293.333	550.333	727	814.333		1.89659	0.923408	0.0307742
Art5	7	102096879	102109489	-		Art5	ENSMUSG00000070424	ADP-ribosyltransferase 5 [Source:MGI Symbol;Acc:MGI:107948]	0.333333	9.66667	0.666667	3	4.33333		0.0344828	-4.85798	0.0251001
Pgap2	7	102210208	102238567	+		Pgap2	ENSMUSG00000030990	post-GPI attachment to proteins 2 [Source:MGI Symbol;Acc:MGI:2385286]	893	490.333	1650.67	1355.67	1448.33		1.82121	0.864897	0.000109367
AC139579.1	7	102235854	102237530	+		Pgap2	ENSMUSG00000030990	post-GPI attachment to proteins 2 [Source:MGI Symbol;Acc:MGI:2385286]	230.333	111.667	512	422	442		2.06269	1.04452	0.000345575
Hbb-bt	7	103812524	103813996	-		Hbb-bt	ENSMUSG00000073940	hemoglobin, beta adult t chain [Source:MGI Symbol;Acc:MGI:5474850]	131	314.667	12826.3	15856.3	397.667		0.416314	-1.26426	0.0242275
Hbb-bs	7	103826534	103828096	-		Hbb-bs	ENSMUSG00000052305	hemoglobin, beta adult s chain [Source:MGI Symbol;Acc:MGI:5474852]	227.667	562.667	87005.7	125235	3256.33		0.404621	-1.30536	0.0156005
Trim6	7	104218793	104235152	+		Trim6	ENSMUSG00000072244	tripartite motif-containing 6 [Source:MGI Symbol;Acc:MGI:2137352]	467.333	28	44.3333	105.667	183		16.6905	4.06095	2.69463e-27
Trim5	7	104263386	104288094	-		Trim5	ENSMUSG00000060441	tripartite motif-containing 5 [Source:MGI Symbol;Acc:MGI:3646853]	601.333	322	541.667	791.667	919.333		1.86749	0.901104	0.0223623
Tpp1	7	105744811	105752235	-		Tpp1	ENSMUSG00000030894	tripeptidyl peptidase I [Source:MGI Symbol;Acc:MGI:1336194]	1538.33	1186.67	2447	2569.33	3686.67		1.29635	0.374454	0.0487656
Dchs1	7	105752990	105787654	-		Dchs1	ENSMUSG00000036862	dachsous 1 (Drosophila) [Source:MGI Symbol;Acc:MGI:2685011]	66.6667	24	4.66667	9	53.6667		2.77778	1.47393	0.0480987
Ppfibp2	7	107595207	107748583	+		Ppfibp2	ENSMUSG00000036528	PTPRF interacting protein, binding protein 2 (liprin beta 2) [Source:MGI Symbol;Acc:MGI:894649]	1187.33	652	1272	1257	1222.67		1.82106	0.864781	0.00206403
Cyb5r2	7	107748455	107758032	-		Ppfibp2	ENSMUSG00000036528	PTPRF interacting protein, binding protein 2 (liprin beta 2) [Source:MGI Symbol;Acc:MGI:894649]	86.3333	5	79.6667	98	21.3333		17.2667	4.10992	4.42568e-07
Lmo1	7	109138572	109175207	-		Lmo1	ENSMUSG00000036111	LIM domain only 1 [Source:MGI Symbol;Acc:MGI:102812]	0.666667	35.3333	72	8.66667	3		0.0188679	-5.72792	3.95049e-05
St5	7	109523911	109703605	-		St5	ENSMUSG00000031024	suppression of tumorigenicity 5 [Source:MGI Symbol;Acc:MGI:108517]	32	120.333	33	32.6667	26.6667		0.265928	-1.91089	0.000396908
Tmem9b	7	109735834	109752875	-		Tmem9b	ENSMUSG00000031021	TMEM9 domain family, member B [Source:MGI Symbol;Acc:MGI:1915254]	421.667	630.333	954.333	978	998		0.668958	-0.580012	0.0145297
Dennd5a	7	109893780	109960470	-		Dennd5a	ENSMUSG00000035901	DENN/MADD domain containing 5A [Source:MGI Symbol;Acc:MGI:1201681]	3084.67	1918	6985.33	5778.67	6530.33		1.60827	0.685512	0.00134073
Gm45515	7	110277782	110281527	-		Swap70	ENSMUSG00000031015	SWA-70 protein [Source:MGI Symbol;Acc:MGI:1298390]	564	322.667	1734	1759.33	2256.33		1.74793	0.805651	0.00147952
Sbf2	7	110308013	110614922	-		Sbf2	ENSMUSG00000038371	SET binding factor 2 [Source:MGI Symbol;Acc:MGI:1921831]	1438.67	459.333	1022.67	900.667	1223		3.13208	1.64712	2.63499e-17
Pde3b	7	114415281	114539251	+		Pde3b	ENSMUSG00000030671	phosphodiesterase 3B, cGMP-inhibited [Source:MGI Symbol;Acc:MGI:1333863]	2465.33	1394.67	2966.33	2555.33	3365		1.76769	0.821862	0.0148777
Sox6	7	115470872	116038796	-		Sox6	ENSMUSG00000051910	SRY (sex determining region Y)-box 6 [Source:MGI Symbol;Acc:MGI:98368]	5.33333	97.3333	10	8.66667	1.33333		0.0547945	-4.18982	0.000103268
Itpripl2	7	118485111	118491975	-		Itpripl2	ENSMUSG00000095115	inositol 1,4,5-triphosphate receptor interacting protein-like 2 [Source:MGI Symbol;Acc:MGI:2442416]	1469.67	830.333	1260	1412.67	1976		1.76997	0.823726	0.0048598
Gp2	7	119442537	119459285	-		Gp2	ENSMUSG00000030954	glycoprotein 2 (zymogen granule membrane) [Source:MGI Symbol;Acc:MGI:1914383]	0	73	0	0	0		0	#NUM!	4.05877e-07
Cdr2	7	120957036	120982312	-		Cdr2	ENSMUSG00000030878	cerebellar degeneration-related 2 [Source:MGI Symbol;Acc:MGI:1100885]	212	371	282	378	192.667		0.571429	-0.807355	0.0480987
Hs3st2	7	121391859	121501770	+		Gm36736	ENSMUSG00000108351	predicted gene, 36736 [Source:MGI Symbol;Acc:MGI:5595895]	52.6667	170.667	2	2.33333	23.6667		0.308594	-1.69622	0.00385504
Ears2	7	122037213	122067263	-		Ears2	ENSMUSG00000030871	glutamyl-tRNA synthetase 2, mitochondrial [Source:MGI Symbol;Acc:MGI:1914667]	580.667	263	728	448.667	406.667		2.20786	1.14265	1.82476e-09
Gtf3c1	7	125640954	125707780	-		Gtf3c1	ENSMUSG00000032777	general transcription factor III C 1 [Source:MGI Symbol;Acc:MGI:107887]	1280.67	922.333	1572	1336	2106.67		1.38851	0.473535	0.0354345
D430042O09Rik	7	125707888	125874793	+		D430042O09Rik	ENSMUSG00000032743	RIKEN cDNA D430042O09 gene [Source:MGI Symbol;Acc:MGI:2442760]	537.333	319	450	404.333	497.667		1.68443	0.752261	0.00080329
Sbk1	7	126272619	126295016	+		Sbk1	ENSMUSG00000042978	SH3-binding kinase 1 [Source:MGI Symbol;Acc:MGI:2135937]	910.333	1526	4698	4476.33	7190.67		0.596549	-0.745288	0.000434282
Lat	7	126363824	126369570	-		Lat	ENSMUSG00000030742	linker for activation of T cells [Source:MGI Symbol;Acc:MGI:1342293]	219.333	574	463.667	552	892.333		0.382114	-1.38793	0.00126941
Il27	7	126589010	126594941	-		Apobr	ENSMUSG00000042759	apolipoprotein B receptor [Source:MGI Symbol;Acc:MGI:2176230]	22	50.6667	189.333	54.6667	25.6667		0.434211	-1.20353	0.0364745
Sult1a1	7	126672865	126676432	-		Sgf29	ENSMUSG00000030714	SAGA complex associated factor 29 [Source:MGI Symbol;Acc:MGI:1922815]	22.3333	125.667	5.33333	10	13.6667		0.177719	-2.49233	3.51446e-06
Mvp	7	126986860	127014621	-		Mvp	ENSMUSG00000030681	major vault protein [Source:MGI Symbol;Acc:MGI:1925638]	1594.67	915	5489.67	6077.67	5853		1.74281	0.801411	6.86545e-06
AI467606	7	127091359	127093986	+		AI467606	ENSMUSG00000045165	expressed sequence AI467606 [Source:MGI Symbol;Acc:MGI:2141979]	533.667	718.667	1603.33	1673.67	2135.67		0.742579	-0.429384	0.0388483
Qprt	7	127107114	127122226	-		Qprt	ENSMUSG00000030674	quinolinate phosphoribosyltransferase [Source:MGI Symbol;Acc:MGI:1914625]	36.3333	108.667	67.3333	68.6667	61.3333		0.334356	-1.58054	0.000118079
Spn	7	127132232	127137823	-		Spn	ENSMUSG00000051457	sialophorin [Source:MGI Symbol;Acc:MGI:98384]	1090.33	2529.33	4986.67	3198.33	2352.33		0.431075	-1.21399	1.28715e-09
Zfp768	7	127342795	127345589	-		Zfp768	ENSMUSG00000047371	zinc finger protein 768 [Source:MGI Symbol;Acc:MGI:2384582]	280.667	168.667	359	332	351.333		1.66403	0.734683	0.0379425
1700008J07Rik	7	127510438	127512869	-		1700008J07Rik	ENSMUSG00000101225	RIKEN cDNA 1700008J07 gene [Source:MGI Symbol;Acc:MGI:1916610]	88.3333	45.6667	88	77	122.333		1.93431	0.951816	0.0208365
Zfp629	7	127607031	127615797	-		Zfp629	ENSMUSG00000045639	zinc finger protein 629 [Source:MGI Symbol;Acc:MGI:2444524]	671.667	253.667	199	252.667	602.667		2.64783	1.40481	0.000102064
Fbxl19	7	127744543	127769483	+		Fbxl19	ENSMUSG00000030811	F-box and leucine-rich repeat protein 19 [Source:MGI Symbol;Acc:MGI:3039600]	468.333	244.333	617	605	756		1.91678	0.938685	0.000361696
9430064I24Rik	7	127800094	127802762	-		Setd1a	ENSMUSG00000042308	SET domain containing 1A [Source:MGI Symbol;Acc:MGI:2446244]	278.667	94.6667	239.667	231	307.333		2.94366	1.55761	1.39815e-08
Hsd3b7	7	127800604	127803802	+		AC149222.1	ENSMUSG00000108815	No description	523.667	206.333	486	520.333	674		2.53796	1.34367	3.08037e-07
Stx1b	7	127803900	127824549	-		Stx1b	ENSMUSG00000030806	syntaxin 1B [Source:MGI Symbol;Acc:MGI:1930705]	75.6667	1.66667	15	26.6667	46.6667		45.4	5.50462	1.72658e-10
Itgax	7	128129547	128150657	+		Itgax	ENSMUSG00000030789	integrin alpha X [Source:MGI Symbol;Acc:MGI:96609]	774.333	2325	1346.67	1049	1158.33		0.333047	-1.5862	4.02386e-14
Itgad	7	128154376	128223816	+		Gm17831	ENSMUSG00000108729	predicted gene, 17831 [Source:MGI Symbol;Acc:MGI:5010016]	1134.33	1788	215.333	204	789.333		0.634415	-0.656502	0.00501639
4931431B13Rik	7	128192050	128203328	-		Itgad	ENSMUSG00000070369	integrin, alpha D [Source:MGI Symbol;Acc:MGI:3578624]	173	305.667	30.6667	37.6667	115.333		0.565976	-0.821187	0.000939621
Btbd16	7	130774069	130825899	+		Fgfr2	ENSMUSG00000030849	fibroblast growth factor receptor 2 [Source:MGI Symbol;Acc:MGI:95523]	3	17.3333	44	22.3333	2		0.173077	-2.53051	0.018439
Htra1	7	130936111	130985660	+		Fgfr2	ENSMUSG00000030849	fibroblast growth factor receptor 2 [Source:MGI Symbol;Acc:MGI:95523]	62	23	36.6667	82.3333	21.6667		2.69565	1.43063	0.041061
Acadsb	7	131410601	131448944	+		Fgfr2	ENSMUSG00000030849	fibroblast growth factor receptor 2 [Source:MGI Symbol;Acc:MGI:95523]	636	377.667	741.333	743.333	590.667		1.68402	0.751913	0.0406978
Chst15	7	132235780	132317228	-		Fgfr2	ENSMUSG00000030849	fibroblast growth factor receptor 2 [Source:MGI Symbol;Acc:MGI:95523]	1236	827.667	1762	1612.67	2383.33		1.49335	0.578557	0.00233336
Nkx1-2	7	132594878	132599637	-		Fgfr2	ENSMUSG00000030849	fibroblast growth factor receptor 2 [Source:MGI Symbol;Acc:MGI:95523]	380	9.66667	5.33333	36	179.333		39.3103	5.29684	1.27219e-11
Gm16764	7	132597387	132599637	+		Fgfr2	ENSMUSG00000030849	fibroblast growth factor receptor 2 [Source:MGI Symbol;Acc:MGI:95523]	19	0.333333	0	2	11.3333		57	5.83289	0.00474551
Lhpp	7	132610638	132706420	+		Fgfr2	ENSMUSG00000030849	fibroblast growth factor receptor 2 [Source:MGI Symbol;Acc:MGI:95523]	326	129.333	259	312.667	340		2.52062	1.33378	0.000793486
Fam53b	7	132712082	132813886	-		Fgfr2	ENSMUSG00000030849	fibroblast growth factor receptor 2 [Source:MGI Symbol;Acc:MGI:95523]	1463.33	1003.67	2600.67	2364.33	3102		1.45799	0.543978	0.0495125
Dock1	7	134670654	135173639	+		Dock1	ENSMUSG00000058325	dedicator of cytokinesis 1 [Source:MGI Symbol;Acc:MGI:2429765]	385.333	114.333	141.333	138	174		3.37026	1.75286	5.47297e-10
Ptpre	7	135537481	135686293	+		Ptpre	ENSMUSG00000041836	protein tyrosine phosphatase, receptor type, E [Source:MGI Symbol;Acc:MGI:97813]	605.333	891	798.333	871.333	855.667		0.679386	-0.557696	0.0104739
5830432E09Rik	7	135635931	135652314	-		Ptpre	ENSMUSG00000041836	protein tyrosine phosphatase, receptor type, E [Source:MGI Symbol;Acc:MGI:97813]	73.6667	218	125	117.667	130.667		0.33792	-1.56524	3.96016e-06
Stk32c	7	139103638	139213307	-		Stk32c	ENSMUSG00000015981	serine/threonine kinase 32C [Source:MGI Symbol;Acc:MGI:2385336]	27.3333	207.667	46.3333	83.3333	33.3333		0.131621	-2.92554	2.56242e-14
Ifitm1	7	140967221	140969825	+		Ifitm1	ENSMUSG00000025491	interferon induced transmembrane protein 1 [Source:MGI Symbol;Acc:MGI:1915963]	534.667	214.333	595	1524	440		2.49456	1.31878	0.00160169
Ifitm6	7	141015699	141017924	-		Ifitm6	ENSMUSG00000059108	interferon induced transmembrane protein 6 [Source:MGI Symbol;Acc:MGI:2686976]	83.6667	278.333	1323	1648.33	47.3333		0.300599	-1.73409	4.87499e-07
Cdhr5	7	141269083	141276786	-		Cdhr5	ENSMUSG00000025497	cadherin-related family member 5 [Source:MGI Symbol;Acc:MGI:1919290]	14.6667	1.33333	27	37.3333	5.33333		11	3.45943	0.0126838
Eps8l2	7	141338880	141363020	+		Eps8l2	ENSMUSG00000025504	EPS8-like 2 [Source:MGI Symbol;Acc:MGI:2138828]	187	17	40	168	256		11	3.45943	1.25787e-07
B230206H07Rik	7	141359141	141365110	-		Eps8l2	ENSMUSG00000025504	EPS8-like 2 [Source:MGI Symbol;Acc:MGI:2138828]	93	9.66667	18.6667	89	126.667		9.62069	3.26614	3.13357e-05
Cd151	7	141467392	141471473	+		Gm10575	ENSMUSG00000073787	predicted gene 10575 [Source:MGI Symbol;Acc:MGI:3708765]	374.333	250.333	300	338.667	670.333		1.49534	0.580473	0.0297641
Polr2l	7	141471860	141475132	-		Polr2l	ENSMUSG00000038489	polymerase (RNA) II (DNA directed) polypeptide L [Source:MGI Symbol;Acc:MGI:1913741]	46.3333	88.6667	69	57.3333	83.3333		0.522556	-0.936341	0.033818
Ifitm10	7	142325837	142373753	-		Ifitm10	ENSMUSG00000045777	interferon induced transmembrane protein 10 [Source:MGI Symbol;Acc:MGI:2444776]	25	176.667	55.6667	81.6667	85		0.141509	-2.82103	1.17818e-10
Tnni2	7	142441808	142444410	+		Tnni2	ENSMUSG00000031097	troponin I, skeletal, fast 2 [Source:MGI Symbol;Acc:MGI:105070]	65	127	167	147.333	210		0.511811	-0.966317	0.0201704
Prr33	7	142491074	142506771	-		Lsp1	ENSMUSG00000018819	lymphocyte specific 1 [Source:MGI Symbol;Acc:MGI:96832]	478.333	194.333	176.667	198.667	693.333		2.46141	1.29948	0.000106688
Slc22a18	7	143473736	143499334	+		Slc22a18	ENSMUSG00000000154	solute carrier family 22 (organic cation transporter), member 18 [Source:MGI Symbol;Acc:MGI:1336884]	38	11	23	38.3333	42		3.45455	1.7885	0.0373216
Osbpl5	7	143688762	143756985	-		Osbpl5	ENSMUSG00000037606	oxysterol binding protein-like 5 [Source:MGI Symbol;Acc:MGI:1930265]	258	455.667	799.333	659	750		0.566203	-0.820608	0.00158108
Cttn	7	144435733	144471009	-		Cttn	ENSMUSG00000031078	cortactin [Source:MGI Symbol;Acc:MGI:99695]	352.333	120.667	127	91.3333	289.333		2.91989	1.54591	4.43344e-10
Ccnd1	7	144929931	144939925	-		Oraov1	ENSMUSG00000031072	oral cancer overexpressed 1 [Source:MGI Symbol;Acc:MGI:1919534]	493.667	1356.67	817.333	1370.33	2031.33		0.363882	-1.45846	2.50727e-05
Tpcn2	7	145186524	145284011	-		Tpcn2	ENSMUSG00000048677	two pore segment channel 2 [Source:MGI Symbol;Acc:MGI:2385297]	768	414.667	377.333	483.333	1225.67		1.85209	0.889154	0.000469463
Insr	8	3122061	3279617	-		Insr	ENSMUSG00000005534	insulin receptor [Source:MGI Symbol;Acc:MGI:96575]	1006.67	581.333	772.667	630.667	1338.33		1.73165	0.792149	6.21588e-05
Mcoln1	8	3500457	3515232	+		Mcoln1	ENSMUSG00000004567	mucolipin 1 [Source:MGI Symbol;Acc:MGI:1890498]	971	665.333	989.333	1138.33	1813		1.45942	0.545394	0.0470645
Pnpla6	8	3515384	3544267	+		Pnpla6	ENSMUSG00000004565	patatin-like phospholipase domain containing 6 [Source:MGI Symbol;Acc:MGI:1354723]	910.667	600.333	675.333	641.667	1177		1.51694	0.601159	0.0209643
Retn	8	3655770	3660110	+		Retn	ENSMUSG00000012705	resistin [Source:MGI Symbol;Acc:MGI:1888506]	23.6667	1	9.66667	4.66667	0.666667		23.6667	4.56478	0.00158036
Clec4g	8	3707064	3720651	-		Clec4g	ENSMUSG00000074491	C-type lectin domain family 4, member g [Source:MGI Symbol;Acc:MGI:1923113]	17.3333	66.3333	5.66667	9.66667	40.6667		0.261307	-1.93618	0.04145
Gm16553	8	3709804	3739044	+		Clec4g	ENSMUSG00000074491	C-type lectin domain family 4, member g [Source:MGI Symbol;Acc:MGI:1923113]	1	31.3333	0.666667	4.66667	8.33333		0.0319149	-4.96963	0.000133329
Cd209a	8	3743397	3748984	-		Cd209a	ENSMUSG00000031494	CD209a antigen [Source:MGI Symbol;Acc:MGI:2157942]	127.333	659.333	55	75.6667	375		0.193124	-2.3724	4.48207e-13
Cd209e	8	3847965	3854309	-		Cd209e	ENSMUSG00000040197	CD209e antigen [Source:MGI Symbol;Acc:MGI:2157948]	5	82.3333	0	1	6.66667		0.0607287	-4.04148	7.64777e-11
Cd209d	8	3871824	3878555	-		Cd209d	ENSMUSG00000031495	CD209d antigen [Source:MGI Symbol;Acc:MGI:2157947]	53.6667	249.333	25.3333	40	241.667		0.215241	-2.21598	6.95783e-06
Cd209b	8	3917655	3926844	-		Cd209b	ENSMUSG00000065987	CD209b antigen [Source:MGI Symbol;Acc:MGI:1916415]	0	38.6667	0	0	1		0	#NUM!	6.31887e-07
Cd209c	8	3940222	3954746	-		Cd209c	ENSMUSG00000040165	CD209c antigen [Source:MGI Symbol;Acc:MGI:2157945]	9	39.6667	1	4.33333	22		0.226891	-2.13993	0.018188
Tgfbr3l	8	4248214	4251423	+		Map2k7	ENSMUSG00000109061	mitogen-activated protein kinase kinase 7 [Source:MGI Symbol;Acc:MGI:1346871]	110	50	94	111	201.667		2.2	1.1375	0.00688706
Efnb2	8	8617434	8661242	-		Efnb2	ENSMUSG00000001300	ephrin B2 [Source:MGI Symbol;Acc:MGI:105097]	850.333	74.6667	1155	438.333	739.333		11.3884	3.50949	2.25823e-10
Gm2814	8	10898169	10900558	-		Gm2814	ENSMUSG00000109291	predicted gene 2814 [Source:MGI Symbol;Acc:MGI:3780984]	3.33333	28	1.66667	1.66667	2		0.119048	-3.07039	0.0065133
4833411C07Rik	8	10899922	10903893	+		Gm2814	ENSMUSG00000109291	predicted gene 2814 [Source:MGI Symbol;Acc:MGI:3780984]	2.33333	22.3333	0.333333	1.66667	1		0.104478	-3.25873	0.00542845
Irs2	8	10984681	11008458	-		Irs2	ENSMUSG00000038894	insulin receptor substrate 2 [Source:MGI Symbol;Acc:MGI:109334]	790	1708	922	781.667	1490.33		0.462529	-1.11238	1.00112e-06
Atp11a	8	12757014	12868728	+		Atp11a	ENSMUSG00000031441	ATPase, class VI, type 11A [Source:MGI Symbol;Acc:MGI:1354735]	1436	453.667	980.667	1250.33	1672.67		3.16532	1.66235	1.25725e-05
Gm15350	8	12828335	12833865	-		Atp11a	ENSMUSG00000031441	ATPase, class VI, type 11A [Source:MGI Symbol;Acc:MGI:1354735]	50.3333	12.6667	29.3333	32.3333	44.6667		3.97368	1.99048	0.00594541
Gm15347	8	12860358	12877344	-		Atp11a	ENSMUSG00000031441	ATPase, class VI, type 11A [Source:MGI Symbol;Acc:MGI:1354735]	40.3333	9.33333	40	40.6667	60.6667		4.32143	2.11151	0.0310542
F7	8	13026034	13035809	+		F7	ENSMUSG00000031443	coagulation factor VII [Source:MGI Symbol;Acc:MGI:109325]	72.6667	3.33333	137.333	206.667	101.333		21.8	4.44626	1.06995e-06
Gas6	8	13465374	13494490	-		Tmem255b	ENSMUSG00000038457	transmembrane protein 255B [Source:MGI Symbol;Acc:MGI:2685533]	292	76.3333	43.6667	102.667	414.667		3.82533	1.93558	0.00246797
Coprs	8	13884794	13890281	-		Coprs	ENSMUSG00000031458	coordinator of PRMT5, differentiation stimulator [Source:MGI Symbol;Acc:MGI:1913673]	102.333	50.6667	66.3333	68.3333	117		2.01974	1.01417	0.0131011
Tdrp	8	13952008	13975032	-		Tdrp	ENSMUSG00000050052	testis development related protein [Source:MGI Symbol;Acc:MGI:1919398]	106	228.667	67.6667	102.333	349.667		0.463557	-1.10918	0.0382825
Gm37844	8	15024326	15028422	-		Kbtbd11	ENSMUSG00000055675	kelch repeat and BTB (POZ) domain containing 11 [Source:MGI Symbol;Acc:MGI:1922151]	88.6667	179.667	249.667	238	318.667		0.493506	-1.01886	0.0219094
Angpt2	8	18690263	18741562	-		Mcph1	ENSMUSG00000039842	microcephaly, primary autosomal recessive 1 [Source:MGI Symbol;Acc:MGI:2443308]	64.3333	5.66667	6	20.6667	34		11.3529	3.50499	4.39623e-08
Agpat5	8	18846277	18891361	+		Agpat5	ENSMUSG00000031467	1-acylglycerol-3-phosphate O-acyltransferase 5 (lysophosphatidic acid acyltransferase, epsilon) [Source:MGI Symbol;Acc:MGI:1196345]	286.667	403	368.667	344.667	444.333		0.711332	-0.491406	0.0419027
Atp7b	8	21992785	22060305	-		Atp7b	ENSMUSG00000006567	ATPase, Cu++ transporting, beta polypeptide [Source:MGI Symbol;Acc:MGI:103297]	4	38.3333	8.66667	5	6.33333		0.104348	-3.26053	0.00510628
Ikbkb	8	22659212	22706589	-		Ikbkb	ENSMUSG00000031537	inhibitor of kappaB kinase beta [Source:MGI Symbol;Acc:MGI:1338071]	2887.33	2164.33	3814	4123	5914		1.33405	0.415815	0.011289
Plat	8	22757727	22782844	+		Plat	ENSMUSG00000031538	plasminogen activator, tissue [Source:MGI Symbol;Acc:MGI:97610]	140.667	11.3333	17.6667	78	36.3333		12.4118	3.63364	1.21899e-07
Ap3m2	8	22787354	22805622	-		Ap3m2	ENSMUSG00000031539	adaptor-related protein complex 3, mu 2 subunit [Source:MGI Symbol;Acc:MGI:1929214]	652.333	432.333	877	758.333	921		1.50887	0.593465	0.00531323
Ank1	8	22974844	23150497	+		Ank1	ENSMUSG00000031543	ankyrin 1, erythroid [Source:MGI Symbol;Acc:MGI:88024]	28.6667	337.667	114.667	54	21.3333		0.0848963	-3.55815	1.2273e-05
Gm15816	8	23138794	23149585	-		Ank1	ENSMUSG00000031543	ankyrin 1, erythroid [Source:MGI Symbol;Acc:MGI:88024]	0.666667	16	9.33333	1.33333	0.666667		0.0416667	-4.58496	0.0314931
Ido2	8	24531892	24576333	-		Ido2	ENSMUSG00000031549	indoleamine 2,3-dioxygenase 2 [Source:MGI Symbol;Acc:MGI:2142489]	320	4	30.6667	71.3333	294.333		80	6.32193	0.0078536
Ido1	8	24584136	24597009	-		Ido1	ENSMUSG00000031551	indoleamine 2,3-dioxygenase 1 [Source:MGI Symbol;Acc:MGI:96416]	318	8.66667	38	129	279		36.6923	5.19741	4.2128e-26
Adam9	8	24949611	25016927	-		Adam9	ENSMUSG00000031555	a disintegrin and metallopeptidase domain 9 (meltrin gamma) [Source:MGI Symbol;Acc:MGI:105376]	1205.67	741.667	878	1047.33	1310.67		1.62562	0.700988	0.0425493
5830408C22Rik	8	25101216	25109986	+		Plekha2	ENSMUSG00000031557	pleckstrin homology domain-containing, family A (phosphoinositide binding specific) member 2 [Source:MGI Symbol;Acc:MGI:1928144]	258.333	124	134.667	146.667	273		2.08333	1.05889	0.00755013
Gm45745	8	25103489	25104668	-		5830408C22Rik	ENSMUSG00000110148	RIKEN cDNA 5830408C22 gene [Source:MGI Symbol;Acc:MGI:1921994]	143	58.3333	94.3333	91.6667	154.333		2.45143	1.29362	0.000186561
Fgfr1	8	25513654	25575718	+		Fgfr1	ENSMUSG00000031565	fibroblast growth factor receptor 1 [Source:MGI Symbol;Acc:MGI:95522]	433.667	203	32.6667	174.333	159		2.13629	1.09511	0.00129786
Adgra2	8	27085583	27123436	+		Adgra2	ENSMUSG00000031486	adhesion G protein-coupled receptor A2 [Source:MGI Symbol;Acc:MGI:1925810]	54	237	33.6667	27.3333	105.667		0.227848	-2.13386	2.96932e-06
Rab11fip1	8	27138773	27174646	-		Rab11fip1	ENSMUSG00000031488	RAB11 family interacting protein 1 (class I) [Source:MGI Symbol;Acc:MGI:1923017]	1941.67	1067	1427	1860.67	1595.33		1.81974	0.863735	0.0284783
Rnf122	8	31111820	31131482	+		Rnf122	ENSMUSG00000039328	ring finger protein 122 [Source:MGI Symbol;Acc:MGI:1916117]	134	352.333	380.667	382	676.333		0.380322	-1.39471	3.7758e-09
Nrg1	8	31814551	32884029	-		Nrg1	ENSMUSG00000062991	neuregulin 1 [Source:MGI Symbol;Acc:MGI:96083]	1026	4.66667	97.3333	487.333	271.333		219.857	7.78042	0
Wrn	8	33234384	33385527	-		Wrn	ENSMUSG00000031583	Werner syndrome RecQ like helicase [Source:MGI Symbol;Acc:MGI:109635]	1078.67	771	990.667	803.667	1177.33		1.39905	0.484446	0.033251
Gsr	8	33652523	33698163	+		Gsr	ENSMUSG00000031584	glutathione reductase [Source:MGI Symbol;Acc:MGI:95804]	1053.33	754.333	2444.67	4526.33	2127.67		1.39638	0.481688	0.040882
Leprotl1	8	34135572	34147033	-		Leprotl1	ENSMUSG00000031513	leptin receptor overlapping transcript-like 1 [Source:MGI Symbol;Acc:MGI:1915442]	570	836.333	1146.67	987.333	1522		0.681546	-0.553116	0.00187213
Saraf	8	34154575	34170821	+		Saraf	ENSMUSG00000031532	store-operated calcium entry-associated regulatory factor [Source:MGI Symbol;Acc:MGI:1915137]	706.333	1315.67	2004.33	1766.33	3067.33		0.536863	-0.897373	1.15617e-07
Gm29243	8	34216859	34226145	+		Gm29243	ENSMUSG00000100605	predicted gene 29243 [Source:MGI Symbol;Acc:MGI:5579949]	1	24.3333	2.66667	4.66667	4.33333		0.0410959	-4.60486	0.000603805
Mfhas1	8	35587798	35679449	+		Gm16793	ENSMUSG00000097357	predicted gene, 16793 [Source:MGI Symbol;Acc:MGI:4439717]	1345.67	874	2636.33	2253	1772.67		1.53966	0.622616	0.0013515
Prag1	8	36094828	36147787	+		Prag1	ENSMUSG00000050271	PEAK1 related kinase activating pseudokinase 1 [Source:MGI Symbol;Acc:MGI:1196223]	208.333	414.667	452.333	432.333	348.333		0.502412	-0.993058	6.40159e-07
AI429214	8	36993604	36995533	+		G630064G18Rik	ENSMUSG00000110242	RIKEN cDNA G630064G18 gene [Source:MGI Symbol;Acc:MGI:3041241]	70.3333	23.3333	23	21	35.6667		3.01429	1.59182	0.00479687
Msr1	8	39581685	39642673	-		Msr1	ENSMUSG00000025044	macrophage scavenger receptor 1 [Source:MGI Symbol;Acc:MGI:98257]	1246.33	125.667	757.667	1435	1119.33		9.91777	3.31002	2.22132e-40
Cnot7	8	40492540	40515847	-		Zdhhc2	ENSMUSG00000039470	zinc finger, DHHC domain containing 2 [Source:MGI Symbol;Acc:MGI:1923452]	658.333	889.667	1135.67	972.333	1314.67		0.739977	-0.434447	0.0367458
Fat1	8	44935447	45052257	+		Fat1	ENSMUSG00000070047	FAT atypical cadherin 1 [Source:MGI Symbol;Acc:MGI:109168]	37.6667	2	8.66667	4	10.3333		18.8333	4.23522	0.00160597
Snx25	8	46033261	46152159	-		Snx25	ENSMUSG00000038291	sorting nexin 25 [Source:MGI Symbol;Acc:MGI:2142610]	650.333	905.667	966	729.333	1227.67		0.718071	-0.477801	0.0298666
Gm45244	8	46471391	46473590	-		Acsl1	ENSMUSG00000018796	acyl-CoA synthetase long-chain family member 1 [Source:MGI Symbol;Acc:MGI:102797]	1.66667	17	1.66667	4.33333	2.66667		0.0980392	-3.3505	0.00806771
Casp3	8	46617291	46639689	+		Casp3	ENSMUSG00000031628	caspase 3 [Source:MGI Symbol;Acc:MGI:107739]	1522	968.667	2651	2179.67	3780		1.57123	0.651896	6.89781e-05
Trappc11	8	47490115	47533470	-		Trappc11	ENSMUSG00000038102	trafficking protein particle complex 11 [Source:MGI Symbol;Acc:MGI:2444585]	1106	800.333	1101.33	1045.67	1767		1.38192	0.466679	0.0088784
Cdkn2aip	8	47709344	47713932	-		Cdkn2aip	ENSMUSG00000038069	CDKN2A interacting protein [Source:MGI Symbol;Acc:MGI:1918175]	398.667	600	475	419.333	735.333		0.664444	-0.58978	0.031989
Vegfc	8	54077606	54187096	+		Vegfc	ENSMUSG00000031520	vascular endothelial growth factor C [Source:MGI Symbol;Acc:MGI:109124]	26.6667	97.6667	15	9.33333	17		0.273038	-1.87283	0.000311417
Fbxo8	8	56551090	56593939	+		Fbxo8	ENSMUSG00000038206	F-box protein 8 [Source:MGI Symbol;Acc:MGI:1354696]	295.333	395.667	474.333	367.333	515		0.74642	-0.421941	0.0479032
Galnt7	8	57523828	57653032	-		Galnt7	ENSMUSG00000031608	UDP-N-acetyl-alpha-D-galactosamine: polypeptide N-acetylgalactosaminyltransferase 7 [Source:MGI Symbol;Acc:MGI:1349449]	856.333	647	926.333	765.333	866		1.32354	0.404407	0.0478127
Sh3rf1	8	61223872	61396071	+		Sh3rf1	ENSMUSG00000031642	SH3 domain containing ring finger 1 [Source:MGI Symbol;Acc:MGI:1913066]	245.333	126	154.333	123.333	180		1.94709	0.96132	0.0243826
Palld	8	61511433	61902690	-		Palld	ENSMUSG00000058056	palladin, cytoskeletal associated protein [Source:MGI Symbol;Acc:MGI:1919583]	765	85.6667	62.6667	396.667	504		8.92996	3.15865	1.26623e-15
Ddx60	8	61928087	62038244	+		Ddx60	ENSMUSG00000037921	DEAD (Asp-Glu-Ala-Asp) box polypeptide 60 [Source:MGI Symbol;Acc:MGI:2384570]	687	331.333	1166	1144.33	503.667		2.07344	1.05203	0.0352683
Gm15354	8	66384623	66387535	-		March1	ENSMUSG00000036469	membrane-associated ring finger (C3HC4) 1 [Source:MGI Symbol;Acc:MGI:1920175]	24.6667	63.6667	29.6667	35.3333	57.6667		0.387435	-1.36798	0.00848215
Sh2d4a	8	68276567	68347699	+		Sh2d4a	ENSMUSG00000053886	SH2 domain containing 4A [Source:MGI Symbol;Acc:MGI:1919531]	448.667	59	37	235	122.333		7.60452	2.92686	1.15633e-09
Lpar2	8	69822429	69831102	+		Lpar2	ENSMUSG00000031861	lysophosphatidic acid receptor 2 [Source:MGI Symbol;Acc:MGI:1858422]	157	335.333	477	252	487.333		0.468191	-1.09483	0.00244171
Isyna1	8	70594373	70597290	+		Isyna1	ENSMUSG00000019139	myo-inositol 1-phosphate synthase A1 [Source:MGI Symbol;Acc:MGI:1919030]	429.333	584.333	1277.33	1054	1574.67		0.73474	-0.444693	0.0392305
Ssbp4	8	70597490	70608872	-		Ssbp4	ENSMUSG00000070003	single stranded DNA binding protein 4 [Source:MGI Symbol;Acc:MGI:1924150]	243.667	381.333	1035.33	1041.33	872		0.638986	-0.646144	0.0244569
Gdf15	8	70629393	70632456	-		Gdf15	ENSMUSG00000038508	growth differentiation factor 15 [Source:MGI Symbol;Acc:MGI:1346047]	181.667	318.667	325.667	818.667	1321.67		0.570084	-0.810754	0.0294759
Pgpep1	8	70646435	70660388	-		Pgpep1	ENSMUSG00000056204	pyroglutamyl-peptidase I [Source:MGI Symbol;Acc:MGI:1913772]	418.667	228.667	571.667	543.667	684.333		1.8309	0.872556	0.00702987
Jund	8	70698949	70700616	+		Jund	ENSMUSG00000071076	jun D proto-oncogene [Source:MGI Symbol;Acc:MGI:96648]	633.333	1476.33	6640.33	6245.33	5918.33		0.428991	-1.22098	0.000170654
Gm11175	8	70699162	70700080	-		Jund	ENSMUSG00000071076	jun D proto-oncogene [Source:MGI Symbol;Acc:MGI:96648]	332.333	760	4048.33	3657	3520.33		0.437281	-1.19337	0.000780012
Gm16486	8	70703457	70717650	+		Gm16486	ENSMUSG00000110622	predicted gene 16486 [Source:MGI Symbol;Acc:MGI:3708784]	0.666667	13	0	1.33333	1		0.0512821	-4.2854	0.0177755
Gm3336	8	70718543	70722634	+		Gm3336	ENSMUSG00000095026	predicted gene 3336 [Source:MGI Symbol;Acc:MGI:3781514]	1	17.6667	1.33333	0.333333	0.666667		0.0566038	-4.14296	0.011919
Il12rb1	8	70808449	70821424	+		Il12rb1	ENSMUSG00000000791	interleukin 12 receptor, beta 1 [Source:MGI Symbol;Acc:MGI:104579]	43.3333	131.333	294.333	174	66.6667		0.329949	-1.59968	0.00763439
Gm10654	8	70931405	70933037	+		Gm10654	ENSMUSG00000074252	predicted gene 10654 [Source:MGI Symbol;Acc:MGI:3643366]	0	10.3333	2.66667	2	2.33333		0	#NUM!	0.0415434
Myo9b	8	71272714	71360713	+		Haus8	ENSMUSG00000035439	4HAUS augmin-like complex, subunit 8 [Source:MGI Symbol;Acc:MGI:1923728]	2879.67	2238.67	5220	5856.33	7671		1.28633	0.363262	0.0252604
Ushbp1	8	71384272	71395802	-		Ushbp1	ENSMUSG00000034911	USH1 protein network component harmonin binding protein 1 [Source:MGI Symbol;Acc:MGI:1922920]	0.666667	18.6667	2.66667	2	3		0.0357143	-4.80735	0.0041085
Slc27a1	8	71568882	71587302	+		Slc27a1	ENSMUSG00000031808	solute carrier family 27 (fatty acid transporter), member 1 [Source:MGI Symbol;Acc:MGI:1347098]	330	159.333	357	491.667	611.333		2.07113	1.05042	0.0481299
Fam129c	8	71597648	71607936	+		Pgls	ENSMUSG00000031807	6-phosphogluconolactonase [Source:MGI Symbol;Acc:MGI:1913421]	1091.67	657	2951	2941.33	3185.67		1.66159	0.732567	0.0160505
Gm16091	8	72147601	72160855	-		Tpm4	ENSMUSG00000031799	tropomyosin 4 [Source:MGI Symbol;Acc:MGI:2449202]	126	53.3333	17.6667	26.6667	83		2.3625	1.24031	0.00228625
Klf2	8	72319033	72321656	+		Klf2	ENSMUSG00000055148	Kruppel-like factor 2 (lung) [Source:MGI Symbol;Acc:MGI:1342772]	397.333	1297.67	5164.33	4954.67	5920		0.306191	-1.7075	6.86218e-07
Med26	8	72494561	72548270	-		Gm17435	ENSMUSG00000097000	predicted gene, 17435 [Source:MGI Symbol;Acc:MGI:4937069]	247.667	394.667	453.667	375.333	435.667		0.627534	-0.672235	0.0201205
F2rl3	8	72761880	72763874	+		F2rl3	ENSMUSG00000050147	coagulation factor II (thrombin) receptor- like 3 [Source:MGI Symbol;Acc:MGI:1298207]	5.66667	20.3333	7	19	8		0.278689	-1.84327	0.0470645
Gm45705	8	72765481	72767614	+		Gm45705	ENSMUSG00000110481	predicted gene 45705 [Source:MGI Symbol;Acc:MGI:5804820]	2	21	3	9.33333	3.33333		0.0952381	-3.39232	0.00381895
Gm45706	8	72765481	72767616	-		Gm45705	ENSMUSG00000110481	predicted gene 45705 [Source:MGI Symbol;Acc:MGI:5804820]	2	21	3	9.33333	3.33333		0.0952381	-3.39232	0.00381895
Large1	8	72814599	73353540	-		Large1	ENSMUSG00000004383	LARGE xylosyl- and glucuronyltransferase 1 [Source:MGI Symbol;Acc:MGI:1342270]	352	169.333	93	171.333	338.667		2.07874	1.05571	0.00474551
Arhgap10	8	77250366	77517953	-		Arhgap10	ENSMUSG00000037148	Rho GTPase activating protein 10 [Source:MGI Symbol;Acc:MGI:1925764]	366.667	172.333	255	238.333	545		2.12766	1.08927	0.000113213
Zfp827	8	79028437	79193766	+		Zfp827	ENSMUSG00000071064	zinc finger protein 827 [Source:MGI Symbol;Acc:MGI:2444807]	456.667	181.667	256.333	249.667	350.333		2.51376	1.32985	4.33525e-05
Hhip	8	79965851	80058006	-		Hhip	ENSMUSG00000064325	Hedgehog-interacting protein [Source:MGI Symbol;Acc:MGI:1341847]	107.667	2.66667	6	9.33333	27		40.375	5.33539	0.0359371
Gab1	8	80764438	80880519	-		Gab1	ENSMUSG00000031714	growth factor receptor bound protein 2- associated protein 1 [Source:MGI Symbol;Acc:MGI:108088]	209.667	48.6667	27.3333	59	52.3333		4.30822	2.10709	4.36333e-07
Il15	8	82331632	82403222	-		Il15	ENSMUSG00000031712	interleukin 15 [Source:MGI Symbol;Acc:MGI:103014]	405	197	469.667	522.333	459		2.05584	1.03973	0.0103102
Elmod2	8	83312632	83332486	-		Elmod2	ENSMUSG00000035151	ELMO/CED-12 domain containing 2 [Source:MGI Symbol;Acc:MGI:2445165]	595.333	376.333	489.333	394.333	698.667		1.58193	0.661686	0.00501882
Clgn	8	83389867	83428552	+		Clgn	ENSMUSG00000002190	calmegin [Source:MGI Symbol;Acc:MGI:107472]	55.6667	7.66667	3.66667	3.66667	4.33333		7.26087	2.86014	0.00607481
Dnajb1	8	83608193	83612653	+		Dnajb1	ENSMUSG00000005483	DnaJ heat shock protein family (Hsp40) member B1 [Source:MGI Symbol;Acc:MGI:1931874]	602.667	1020	1398.67	1196.67	1371.33		0.59085	-0.759137	5.71125e-07
Ddx39	8	83715177	83726892	+		Ddx39	ENSMUSG00000005481	DEAD (Asp-Glu-Ala-Asp) box polypeptide 39 [Source:MGI Symbol;Acc:MGI:1915528]	1057.67	1756	3848	2926.33	3585.67		0.602316	-0.731408	0.00126941
Adgre5	8	83723251	83741326	-		Ddx39	ENSMUSG00000005481	DEAD (Asp-Glu-Ala-Asp) box polypeptide 39 [Source:MGI Symbol;Acc:MGI:1915528]	1493.33	2917.67	6515.67	5884.33	5788		0.511825	-0.966279	0.000125427
Adgrl1	8	83900105	83941954	+		Adgrl1	ENSMUSG00000013033	adhesion G protein-coupled receptor L1 [Source:MGI Symbol;Acc:MGI:1929461]	195.333	428	238.667	184.667	441.667		0.456386	-1.13167	0.00302866
Il27ra	8	84030294	84042589	-		Palm3	ENSMUSG00000047986	paralemmin 3 [Source:MGI Symbol;Acc:MGI:1921587]	347	797.667	803	849.333	1381		0.435019	-1.20085	0.021171
Gm37352	8	84200869	84203049	+		Gm37352	ENSMUSG00000103593	predicted gene, 37352 [Source:MGI Symbol;Acc:MGI:5610580]	16	88.3333	3.33333	6.66667	28		0.181132	-2.46489	0.000966499
Ier2	8	84661331	84662852	-		Ier2	ENSMUSG00000053560	immediate early response 2 [Source:MGI Symbol;Acc:MGI:104815]	496	1051.33	1497.33	2135	1792.67		0.471782	-1.08381	2.19795e-07
Klf1	8	84901928	84905291	+		Klf1	ENSMUSG00000054191	Kruppel-like factor 1 (erythroid) [Source:MGI Symbol;Acc:MGI:1342771]	3	141.333	4.66667	10	7		0.0212264	-5.558	3.56087e-06
Junb	8	84976910	84978718	-		Junb	ENSMUSG00000052837	jun B proto-oncogene [Source:MGI Symbol;Acc:MGI:96647]	1065.33	2058.67	4314.33	7244.33	5100.33		0.517487	-0.950405	0.000627696
Hook2	8	84990603	85003349	+		Hook2	ENSMUSG00000052566	hook microtubule tethering protein 2 [Source:MGI Symbol;Acc:MGI:2181664]	327	152.667	338	330	436.667		2.14192	1.09891	0.0025699
Mylk3	8	85324303	85386345	-		Mylk3	ENSMUSG00000031698	myosin light chain kinase 3 [Source:MGI Symbol;Acc:MGI:2443063]	0.666667	62	6	3.33333	0		0.0107527	-6.53916	0.00013382
4921524J17Rik	8	85408759	85432833	-		4921524J17Rik	ENSMUSG00000036934	RIKEN cDNA 4921524J17 gene [Source:MGI Symbol;Acc:MGI:1913964]	165.333	275.333	231.667	238.333	256.333		0.600484	-0.735802	0.00576263
Cbln1	8	87468405	87472609	-		Gm2694	ENSMUSG00000097248	predicted gene 2694 [Source:MGI Symbol;Acc:MGI:3780864]	0	30	0.666667	0	1.66667		0	#NUM!	7.17407e-06
Nod2	8	88647315	88688474	+		Nod2	ENSMUSG00000055994	nucleotide-binding oligomerization domain containing 2 [Source:MGI Symbol;Acc:MGI:2429397]	943.667	377	255.333	852.333	497		2.50309	1.32371	8.56979e-05
Tox3	8	90247040	90348343	-		Tox3	ENSMUSG00000043668	TOX high mobility group box family member 3 [Source:MGI Symbol;Acc:MGI:3039593]	119.333	17	41.3333	53	95		7.01961	2.81139	0.00252217
Rpgrip1l	8	91217030	91313262	-		Gm36243	ENSMUSG00000110089	predicted gene, 36243 [Source:MGI Symbol;Acc:MGI:5595402]	231.667	102.667	138.667	103.333	118.333		2.25649	1.17408	1.38602e-05
Mt2	8	94172664	94173568	+		Gm45774	ENSMUSG00000110588	predicted gene 45774 [Source:MGI Symbol;Acc:MGI:5804889]	44	151.333	27.3333	102	32.3333		0.290749	-1.78215	0.0122288
Gm15889	8	94377872	94380317	+		Gm15889	ENSMUSG00000089712	predicted gene 15889 [Source:MGI Symbol;Acc:MGI:3802159]	46.6667	11.3333	8.66667	14.6667	45.3333		4.11765	2.04182	0.00109368
Gm15890	8	94379184	94386972	-		Gm15889	ENSMUSG00000089712	predicted gene 15889 [Source:MGI Symbol;Acc:MGI:3802159]	27.6667	7.33333	7	10.6667	33.3333		3.77273	1.91561	0.0247156
9330175E14Rik	8	94422898	94435103	-		9330175E14Rik	ENSMUSG00000097194	RIKEN cDNA 9330175E14 gene [Source:MGI Symbol;Acc:MGI:2443913]	348	153.333	321.667	268.333	495.333		2.26957	1.18242	7.09213e-07
Nlrc5	8	94434356	94527272	+		9330175E14Rik	ENSMUSG00000097194	RIKEN cDNA 9330175E14 gene [Source:MGI Symbol;Acc:MGI:2443913]	2774.33	2132	6954	6451	6777		1.30128	0.379934	0.0318376
Cpne2	8	94532990	94570531	+		Cpne2	ENSMUSG00000034361	copine II [Source:MGI Symbol;Acc:MGI:2387578]	792	202.667	2385.67	1790.33	1040.67		3.90789	1.96639	5.78525e-14
Ccl22	8	94745590	94751699	+		Ccl22	ENSMUSG00000031779	chemokine (C-C motif) ligand 22 [Source:MGI Symbol;Acc:MGI:1306779]	3866.33	242.667	22478.3	29537	4054.33		15.9327	3.99392	1.00401e-36
Cx3cl1	8	94772009	94782427	+		Cx3cl1	ENSMUSG00000031778	chemokine (C-X3-C motif) ligand 1 [Source:MGI Symbol;Acc:MGI:1097153]	917	37	1170	1417	359.667		24.7838	4.63132	4.49175e-06
Ccdc102a	8	94902869	94918098	-		Ccdc102a	ENSMUSG00000063605	coiled-coil domain containing 102A [Source:MGI Symbol;Acc:MGI:2686927]	96.3333	198.667	55.6667	150.667	104.667		0.484899	-1.04424	0.000497957
Adgrg5	8	94923694	94943280	+		Adgrg5	ENSMUSG00000061577	adhesion G protein-coupled receptor G5 [Source:MGI Symbol;Acc:MGI:2685955]	129	538.667	64	185.667	155.667		0.23948	-2.06202	2.40855e-09
Kifc3	8	95099828	95202812	-		Katnb1	ENSMUSG00000031787	katanin p80 (WD40-containing) subunit B 1 [Source:MGI Symbol;Acc:MGI:1921437]	55.6667	178	324.333	442	70.3333		0.312734	-1.67699	3.09079e-06
Gins3	8	95633453	95645060	+		Gins3	ENSMUSG00000031669	GINS complex subunit 3 (Psf3 homolog) [Source:MGI Symbol;Acc:MGI:1926083]	724.667	246.667	745	508	746.333		2.93784	1.55475	1.79506e-12
Slc38a7	8	95835920	95853539	-		Slc38a7	ENSMUSG00000036534	solute carrier family 38, member 7 [Source:MGI Symbol;Acc:MGI:2679005]	675.333	407.333	907.667	864	964.333		1.65794	0.72939	0.0156024
Cdh5	8	104101625	104144511	+		Gm29682	ENSMUSG00000110053	predicted gene, 29682 [Source:MGI Symbol;Acc:MGI:5588841]	43.3333	146	97	104.667	120		0.296804	-1.75242	0.0124238
Cmtm4	8	104348191	104395807	-		Cmtm4	ENSMUSG00000096188	CKLF-like MARVEL transmembrane domain containing 4 [Source:MGI Symbol;Acc:MGI:2142888]	741	385.333	140.667	150.333	814		1.92301	0.943367	0.0376922
Terb1	8	104446719	104509910	-		Terb1	ENSMUSG00000052616	telomere repeat binding bouquet formation protein 1 [Source:MGI Symbol;Acc:MGI:2443187]	4	49.6667	4	3.33333	6.33333		0.0805369	-3.63421	1.92891e-06
Ces2c	8	104847068	104854483	+		Ces2c	ENSMUSG00000061825	carboxylesterase 2C [Source:MGI Symbol;Acc:MGI:2385905]	85.3333	19.3333	100	125	8		4.41379	2.14202	0.000785305
Ces2g	8	104961718	104969537	+		Ces2g	ENSMUSG00000031877	carboxylesterase 2G [Source:MGI Symbol;Acc:MGI:1919611]	3.33333	251.667	12.6667	12	0		0.013245	-6.2384	4.33525e-05
4931428F04Rik	8	105280409	105289864	-		Nol3	ENSMUSG00000014776	nucleolar protein 3 (apoptosis repressor with CARD domain) [Source:MGI Symbol;Acc:MGI:1925938]	212	101.667	130.667	136.667	165		2.08525	1.06022	0.0212874
Tppp3	8	105467493	105471526	-		Tppp3	ENSMUSG00000014846	tubulin polymerization-promoting protein family member 3 [Source:MGI Symbol;Acc:MGI:1915221]	22.3333	198.333	101	29.3333	15		0.112605	-3.15066	3.98093e-15
Gm38384	8	105633750	105634871	+		Agrp	ENSMUSG00000005705	agouti related neuropeptide [Source:MGI Symbol;Acc:MGI:892013]	47.3333	10.3333	10	14.6667	52.3333		4.58065	2.19555	0.0226975
Tsnaxip1	8	105827731	105844680	+		Tsnaxip1	ENSMUSG00000031893	translin-associated factor X (Tsnax) interacting protein 1 [Source:MGI Symbol;Acc:MGI:1919486]	1.33333	11.6667	2.66667	4.33333	7.66667		0.114286	-3.12928	0.0496502
Dpep2	8	105984944	105996423	-		Gm45752	ENSMUSG00000110457	predicted gene 45752 [Source:MGI Symbol;Acc:MGI:5804867]	272	174	84	171.333	215.667		1.56322	0.644519	0.0148643
Nqo1	8	107388225	107403206	-		Nqo1	ENSMUSG00000003849	NAD(P)H dehydrogenase, quinone 1 [Source:MGI Symbol;Acc:MGI:103187]	226.333	58.6667	109	324	100.667		3.85795	1.94784	0.000379251
Nob1	8	107412486	107425051	-		Nob1	ENSMUSG00000003848	NIN1/RPN12 binding protein 1 homolog [Source:MGI Symbol;Acc:MGI:1914869]	356.667	540.667	699.333	585.667	716.333		0.659679	-0.600163	0.00564983
Hp	8	109575128	109579172	-		Hp	ENSMUSG00000031722	haptoglobin [Source:MGI Symbol;Acc:MGI:96211]	320	181.667	332.667	4677.67	268.333		1.76147	0.816778	0.0136699
Glg1	8	111154421	111259216	-		Glg1	ENSMUSG00000003316	golgi apparatus protein 1 [Source:MGI Symbol;Acc:MGI:104967]	2657.67	2010	3160.33	2621.33	3958.67		1.32222	0.402965	0.0162351
Mlkl	8	111311797	111338177	-		Mlkl	ENSMUSG00000012519	mixed lineage kinase domain-like [Source:MGI Symbol;Acc:MGI:1921818]	297	111.333	445	372.667	176.333		2.66766	1.41558	1.5071e-06
Fa2h	8	111345135	111393824	-		Fa2h	ENSMUSG00000033579	fatty acid 2-hydroxylase [Source:MGI Symbol;Acc:MGI:2443327]	22	0.666667	0	0	0.333333		33	5.04439	0.000722821
Tmem231	8	111912011	111933881	-		Tmem231	ENSMUSG00000031951	transmembrane protein 231 [Source:MGI Symbol;Acc:MGI:2685024]	36	88.6667	66	69.6667	49		0.406015	-1.30039	0.0425233
Mon1b	8	113635587	113645179	+		Mon1b	ENSMUSG00000078908	MON1 homolog B, secretory traffciking associated [Source:MGI Symbol;Acc:MGI:1923231]	976	697.667	1480	1194	1402		1.39895	0.484343	0.0454279
Cmc2	8	116888685	116921455	-		Cmc2	ENSMUSG00000014633	COX assembly mitochondrial protein 2 [Source:MGI Symbol;Acc:MGI:1913781]	321	134.333	387.333	581	393.667		2.38958	1.25676	0.0167681
Atmin	8	116943393	116960445	+		Atmin	ENSMUSG00000047388	ATM interactor [Source:MGI Symbol;Acc:MGI:2682328]	1686	870.333	2387.33	2687.67	2411.67		1.93719	0.953965	5.46727e-06
Crispld2	8	119992438	120052793	+		Gm20388	ENSMUSG00000092329	predicted gene 20388 [Source:MGI Symbol;Acc:MGI:5141853]	605.333	72	81.3333	560	1243.67		8.40741	3.07166	3.11479e-06
Zfpm1	8	122282141	122337251	+		Gm20388	ENSMUSG00000092329	predicted gene 20388 [Source:MGI Symbol;Acc:MGI:5141853]	279.333	532.667	1840.67	1672	1034.33		0.524405	-0.931245	0.000424797
Mvd	8	122433601	122443422	-		Gm20388	ENSMUSG00000092329	predicted gene 20388 [Source:MGI Symbol;Acc:MGI:5141853]	517	244.667	651	1073	885.667		2.11308	1.07935	3.85296e-05
Rnf166	8	122466147	122476064	-		Gm20388	ENSMUSG00000092329	predicted gene 20388 [Source:MGI Symbol;Acc:MGI:5141853]	465.333	638.333	1075.67	1124	1439.67		0.728982	-0.456045	0.0189527
A530010L16Rik	8	122760045	122763021	-		Gm20388	ENSMUSG00000092329	predicted gene 20388 [Source:MGI Symbol;Acc:MGI:5141853]	229.333	40.3333	65	70.3333	202.333		5.68595	2.5074	5.64356e-05
Cpne7	8	123117374	123135182	+		Gm20388	ENSMUSG00000092329	predicted gene 20388 [Source:MGI Symbol;Acc:MGI:5141853]	19	315.333	15	12	88.6667		0.0602537	-4.05281	1.58061e-10
Fanca	8	123268300	123318576	-		Gm20388	ENSMUSG00000092329	predicted gene 20388 [Source:MGI Symbol;Acc:MGI:5141853]	315.667	479.333	674.333	358.333	733		0.658554	-0.602627	0.0093062
Rab4a	8	123805985	123835287	+		Gm20388	ENSMUSG00000092329	predicted gene 20388 [Source:MGI Symbol;Acc:MGI:5141853]	7.66667	48.6667	22	24	7		0.157534	-2.66626	0.00118964
Taf5l	8	123996318	124021397	-		Gm20388	ENSMUSG00000092329	predicted gene 20388 [Source:MGI Symbol;Acc:MGI:5141853]	482.333	742.333	1025.67	761.333	887.333		0.649753	-0.622037	0.00013382
Fam89a	8	124740257	124751832	-		Fam89a	ENSMUSG00000043068	family with sequence similarity 89, member A [Source:MGI Symbol;Acc:MGI:1916877]	126.667	41.3333	208.333	253	128		3.06452	1.61566	2.19608e-06
Egln1	8	124908587	124949324	-		Egln1	ENSMUSG00000031987	egl-9 family hypoxia-inducible factor 1 [Source:MGI Symbol;Acc:MGI:1932286]	524.667	780.667	933	701.333	917.333		0.672075	-0.573306	0.000809404
Disc1	8	125054195	125261858	+		Disc1	ENSMUSG00000043051	disrupted in schizophrenia 1 [Source:MGI Symbol;Acc:MGI:2447658]	27.6667	81	45.3333	24.6667	32		0.341564	-1.54977	0.000120932
Dync2h1	9	6928503	7184446	-		Dync2h1	ENSMUSG00000047193	dynein cytoplasmic 2 heavy chain 1 [Source:MGI Symbol;Acc:MGI:107736]	372	149	206.667	143	190.333		2.49664	1.31999	6.16408e-11
Mmp13	9	7272514	7283331	+		Mmp13	ENSMUSG00000050578	matrix metallopeptidase 13 [Source:MGI Symbol;Acc:MGI:1340026]	434.667	142	40	93.6667	957		3.06103	1.61402	5.21609e-05
Mmp8	9	7558456	7568485	+		Mmp8	ENSMUSG00000005800	matrix metallopeptidase 8 [Source:MGI Symbol;Acc:MGI:1202395]	628	84.3333	689.333	5538.67	257		7.44664	2.89659	1.96633e-27
Mmp27	9	7571396	7581885	+		Mmp27	ENSMUSG00000070323	matrix metallopeptidase 27 [Source:MGI Symbol;Acc:MGI:3039232]	362	33.6667	9.66667	26.6667	204.333		10.7525	3.4266	1.00631e-13
Mmp20	9	7628231	7674979	+		Mmp20	ENSMUSG00000018620	matrix metallopeptidase 20 (enamelysin) [Source:MGI Symbol;Acc:MGI:1353466]	34	1	1.66667	4	3.33333		34	5.08746	0.000293891
AV064505	9	7669429	7695631	-		Mmp20	ENSMUSG00000018620	matrix metallopeptidase 20 (enamelysin) [Source:MGI Symbol;Acc:MGI:1353466]	26.6667	1.66667	1.33333	9	12		16	4	0.000699675
Mmp7	9	7692090	7699585	+		AV064505	ENSMUSG00000086381	expressed sequence AV064505 [Source:MGI Symbol;Acc:MGI:2143259]	197.667	10	8.66667	51	84.3333		19.7667	4.305	1.27173e-11
Tmem123	9	7764041	7794333	+		Tmem123	ENSMUSG00000050912	transmembrane protein 123 [Source:MGI Symbol;Acc:MGI:1919179]	3760.33	2436.33	32349.7	30419.3	31771		1.54344	0.626149	0.00512109
Birc2	9	7818227	7837064	-		Birc2	ENSMUSG00000057367	baculoviral IAP repeat-containing 2 [Source:MGI Symbol;Acc:MGI:1197009]	2371.67	1239	3058.33	3730.33	5115.67		1.91418	0.936725	5.33863e-09
Arhgap42	9	8994329	9239101	-		Arhgap42	ENSMUSG00000050730	Rho GTPase activating protein 42 [Source:MGI Symbol;Acc:MGI:1918794]	10.6667	44.6667	0.666667	0.666667	1		0.238806	-2.06609	0.00801341
Piwil4	9	14696230	14740733	-		Piwil4	ENSMUSG00000036912	piwi-like RNA-mediated gene silencing 4 [Source:MGI Symbol;Acc:MGI:3041167]	58.6667	7.33333	6.33333	39.3333	23		8	3	1.23659e-05
Fut4	9	14748320	14752393	-		Fut4	ENSMUSG00000049307	fucosyltransferase 4 [Source:MGI Symbol;Acc:MGI:95594]	909.333	343.333	323	869.333	1236		2.64854	1.4052	9.69143e-09
1700012B09Rik	9	14756587	14771030	-		1700012B09Rik	ENSMUSG00000031927	RIKEN cDNA 1700012B09 gene [Source:MGI Symbol;Acc:MGI:1916575]	21	0.333333	0	0.333333	0.333333		63	5.97728	0.000546517
Gpr83	9	14860210	14870789	+		Gpr83	ENSMUSG00000031932	G protein-coupled receptor 83 [Source:MGI Symbol;Acc:MGI:95712]	2.33333	38	10.6667	14	21		0.0614035	-4.02554	0.00204347
Izumo1r	9	14885814	14903949	-		Izumo1r	ENSMUSG00000031933	IZUMO1 receptor, JUNO [Source:MGI Symbol;Acc:MGI:1929185]	30.3333	218.667	142.333	253.667	114		0.13872	-2.84976	0.000281936
Panx1	9	15002128	15045478	-		Panx1	ENSMUSG00000031934	pannexin 1 [Source:MGI Symbol;Acc:MGI:1860055]	413.667	709	614.667	622.333	814.667		0.583451	-0.777317	2.83971e-05
Taf1d	9	15306214	15316991	+		4931406C07Rik	ENSMUSG00000031938	RIKEN cDNA 4931406C07 gene [Source:MGI Symbol;Acc:MGI:1918234]	841.667	1180.67	968.333	841.333	1162.67		0.712874	-0.488281	0.0100393
Icam4	9	21029373	21030595	+		AC159314.1	ENSMUSG00000110790	No description	5.66667	34.6667	9	14	8.33333		0.163462	-2.61298	0.0305026
Tyk2	9	21104068	21131243	-		1700084C06Rik	ENSMUSG00000086016	RIKEN cDNA 1700084C06 gene [Source:MGI Symbol;Acc:MGI:1923868]	2089.33	1486.67	4616.33	4348	5411		1.40538	0.490962	0.00898681
S1pr5	9	21242912	21248443	-		S1pr5	ENSMUSG00000045087	sphingosine-1-phosphate receptor 5 [Source:MGI Symbol;Acc:MGI:2150641]	58	454.667	32	49	56.6667		0.127566	-2.97068	7.15085e-30
Cdkn2d	9	21288410	21291407	-		Cdkn2d	ENSMUSG00000096472	cyclin-dependent kinase inhibitor 2D (p19, inhibits CDK4) [Source:MGI Symbol;Acc:MGI:105387]	179.333	419.667	734	880	756.333		0.427323	-1.2266	2.84323e-06
Ap1m2	9	21294275	21312337	-		Ap1m2	ENSMUSG00000003309	adaptor protein complex AP-1, mu 2 subunit [Source:MGI Symbol;Acc:MGI:1336974]	161	75.3333	259.667	308	207.333		2.13717	1.0957	0.00659232
Slc44a2	9	21320698	21355028	+		Slc44a2	ENSMUSG00000057193	solute carrier family 44, member 2 [Source:MGI Symbol;Acc:MGI:1915932]	1403	2288	4952.33	4544.67	7420.33		0.613199	-0.705572	0.000569194
Ldlr	9	21723483	21749919	+		Ldlr	ENSMUSG00000032193	low density lipoprotein receptor [Source:MGI Symbol;Acc:MGI:96765]	1662.67	783.667	1733	2215.67	2892.33		2.12165	1.08519	0.000397204
Dock6	9	21799860	21852635	-		Dock6	ENSMUSG00000032198	dedicator of cytokinesis 6 [Source:MGI Symbol;Acc:MGI:1914789]	216	96.3333	271.667	229.333	234		2.24221	1.16492	0.0165445
Tmem205	9	21921008	21927556	-		Tmem205	ENSMUSG00000040883	transmembrane protein 205 [Source:MGI Symbol;Acc:MGI:3045495]	119.333	50	136.667	156.667	159.667		2.38667	1.255	0.0472496
Zfp872	9	22188090	22202123	+		Zfp872	ENSMUSG00000074472	zinc finger protein 872 [Source:MGI Symbol;Acc:MGI:3588272]	449.667	12.3333	93.6667	223.667	441		36.4595	5.18822	0
1810064F22Rik	9	22196963	22213860	-		Zfp872	ENSMUSG00000074472	zinc finger protein 872 [Source:MGI Symbol;Acc:MGI:3588272]	87.3333	3	17.3333	52.3333	85		29.1111	4.8635	3.95061e-09
Zfp809	9	22225714	22243354	+		Zfp809	ENSMUSG00000057982	zinc finger protein 809 [Source:MGI Symbol;Acc:MGI:2143362]	801.667	486.667	563	585	1065.33		1.64726	0.720069	0.00453553
Bmper	9	23223076	23485200	+		Bmper	ENSMUSG00000031963	BMP-binding endothelial regulator [Source:MGI Symbol;Acc:MGI:1920480]	80.3333	9.66667	24	34.3333	61.6667		8.31034	3.05491	1.62514e-05
Dpy19l1	9	24411776	24503140	-		Gm10701	ENSMUSG00000074465	predicted gene 10701 [Source:MGI Symbol;Acc:MGI:3642532]	702.667	1149	1402	605.667	1119		0.611546	-0.709466	0.000323476
Vps26b	9	27007771	27030065	-		Vps26b	ENSMUSG00000031988	VPS26 retromer complex component B [Source:MGI Symbol;Acc:MGI:1917656]	610.667	811.333	766	612	747.333		0.752671	-0.40991	0.0252604
St14	9	31089402	31131853	-		St14	ENSMUSG00000031995	suppression of tumorigenicity 14 (colon carcinoma) [Source:MGI Symbol;Acc:MGI:1338881]	1709.67	379	1340.33	2569	3529.33		4.51099	2.17345	3.11938e-30
Kirrel3os	9	34918233	34929509	-		Kirrel3	ENSMUSG00000032036	kin of IRRE like 3 (Drosophila) [Source:MGI Symbol;Acc:MGI:1914953]	9.66667	0.666667	1	1.66667	1		14.5	3.85798	0.0322258
St3gal4	9	35046576	35119268	-		St3gal4	ENSMUSG00000032038	ST3 beta-galactoside alpha-2,3- sialyltransferase 4 [Source:MGI Symbol;Acc:MGI:1316743]	518	749	630	807.333	783.667		0.691589	-0.532014	0.013337
Cdon	9	35421128	35507652	+		Cdon	ENSMUSG00000038119	cell adhesion molecule-related/down- regulated by oncogenes [Source:MGI Symbol;Acc:MGI:1926387]	1083.33	498.333	640.667	560	827		2.17391	1.12029	0.000181926
Slc37a2	9	37227585	37255738	-		Slc37a2	ENSMUSG00000032122	solute carrier family 37 (glycerol-3- phosphate transporter), member 2 [Source:MGI Symbol;Acc:MGI:1929693]	1849	1107.67	1179	1332	3699.67		1.66927	0.739222	0.00054824
Esam	9	37528078	37538319	+		Esam	ENSMUSG00000001946	endothelial cell-specific adhesion molecule [Source:MGI Symbol;Acc:MGI:1916774]	342.667	142.333	54	264	387.667		2.40749	1.26753	0.00655925
Vsig2	9	37539255	37544205	+		Vsig2	ENSMUSG00000001943	V-set and immunoglobulin domain containing 2 [Source:MGI Symbol;Acc:MGI:1928009]	30.3333	5	0.666667	4.66667	25.3333		6.06667	2.6009	0.0478258
Nrgn	9	37544492	37552904	-		Nrgn	ENSMUSG00000053310	neurogranin [Source:MGI Symbol;Acc:MGI:1927184]	28.6667	102.333	82.6667	187.333	140.333		0.28013	-1.83583	4.36061e-06
Vwa5a	9	38718268	38743337	+		Vwa5a	ENSMUSG00000023186	von Willebrand factor A domain containing 5A [Source:MGI Symbol;Acc:MGI:1915026]	1802.33	782.667	2455.33	4140.33	3313.33		2.30281	1.2034	1.00345e-12
Crtam	9	40969691	41004628	-		Crtam	ENSMUSG00000032021	cytotoxic and regulatory T cell molecule [Source:MGI Symbol;Acc:MGI:1859822]	16.3333	291	104.667	71	106		0.0561283	-4.15513	1.35602e-14
AC160051.2	9	42141993	42146506	+		AC160051.2	ENSMUSG00000111167	No description	10.6667	129.667	25.6667	120.333	56		0.0822622	-3.60363	5.68091e-08
Arhgef12	9	42963842	43107239	-		Arhgef12	ENSMUSG00000059495	Rho guanine nucleotide exchange factor (GEF) 12 [Source:MGI Symbol;Acc:MGI:1916882]	933.333	484.333	778.333	576	803		1.92705	0.946392	0.00210911
Thy1	9	44043384	44048579	+		Thy1	ENSMUSG00000032011	thymus cell antigen 1, theta [Source:MGI Symbol;Acc:MGI:98747]	262.667	906	925	905.667	916.667		0.289919	-1.78628	2.21008e-05
Mcam	9	44134469	44142727	+		Gm10687	ENSMUSG00000097617	predicted gene 10687 [Source:MGI Symbol;Acc:MGI:3642689]	16.6667	427.667	28	32.3333	29.6667		0.0389712	-4.68145	0.00295622
Abcg4	9	44273188	44288615	-		Abcg4	ENSMUSG00000032131	ATP-binding cassette, sub-family G (WHITE), member 4 [Source:MGI Symbol;Acc:MGI:1890594]	5.33333	67.6667	2.66667	4	3.33333		0.0788177	-3.66534	0.00154191
AC151971.9	9	44579608	44584652	+		AC151971.9	ENSMUSG00000111378	No description	2.66667	19.6667	2	4	6.33333		0.135593	-2.88264	0.0200397
AC151971.5	9	44618253	44621018	+		Ddx6	ENSMUSG00000032097	DEAD (Asp-Glu-Ala-Asp) box polypeptide 6 [Source:MGI Symbol;Acc:MGI:104976]	37.6667	152	45.6667	33.3333	43		0.247807	-2.01271	2.93987e-09
Tmem25	9	44793769	44799307	-		Tmem25	ENSMUSG00000002032	transmembrane protein 25 [Source:MGI Symbol;Acc:MGI:1918937]	27.3333	7	80	15.3333	16		3.90476	1.96523	0.0451947
Kmt2a	9	44803355	44881296	-		Kmt2a	ENSMUSG00000002028	lysine (K)-specific methyltransferase 2A [Source:MGI Symbol;Acc:MGI:96995]	3411.67	2257.33	3783.67	3273.33	6732.33		1.51137	0.595857	0.00329627
AC061963.1	9	44877891	44884397	+		Kmt2a	ENSMUSG00000002028	lysine (K)-specific methyltransferase 2A [Source:MGI Symbol;Acc:MGI:96995]	70.3333	7	46	84.3333	47.3333		10.0476	3.32878	3.59942e-06
Cd3g	9	44969572	44980431	-		Cd3g	ENSMUSG00000002033	CD3 antigen, gamma polypeptide [Source:MGI Symbol;Acc:MGI:88333]	185	584.667	792.667	729	627.333		0.31642	-1.66009	0.00226375
Cd3d	9	44981786	44987339	+		Cd3d	ENSMUSG00000032094	CD3 antigen, delta polypeptide [Source:MGI Symbol;Acc:MGI:88331]	167	455.333	801	664.333	771		0.366764	-1.44707	0.0244699
Mpzl2	9	45039799	45054015	+		Mpzl2	ENSMUSG00000032092	myelin protein zero-like 2 [Source:MGI Symbol;Acc:MGI:1289160]	301	30.6667	220	192.333	83.6667		9.81522	3.29502	6.91647e-15
AC122305.1	9	45051424	45055344	-		Mpzl2	ENSMUSG00000032092	myelin protein zero-like 2 [Source:MGI Symbol;Acc:MGI:1289160]	223.667	28.6667	161.333	147	68.6667		7.80233	2.9639	5.60502e-12
Jaml	9	45079183	45108534	+		Jaml	ENSMUSG00000048534	junction adhesion molecule like [Source:MGI Symbol;Acc:MGI:2685484]	329	753	1309.33	984.667	739.667		0.436919	-1.19456	0.000497957
Gm10684	9	45107176	45135606	-		Jaml	ENSMUSG00000048534	junction adhesion molecule like [Source:MGI Symbol;Acc:MGI:2685484]	74.3333	177	323.667	232.333	178.333		0.419962	-1.25167	0.00073048
Scn4b	9	45138395	45154152	+		Scn4b	ENSMUSG00000046480	sodium channel, type IV, beta [Source:MGI Symbol;Acc:MGI:2687406]	129	32.6667	348.667	210.333	314.667		3.94898	1.98148	0.000145732
BC049352	9	45182007	45250020	+		Tmprss4	ENSMUSG00000032091	transmembrane protease, serine 4 [Source:MGI Symbol;Acc:MGI:2384877]	23.3333	72	15.6667	14.3333	23		0.324074	-1.6256	0.000416716
Fxyd6	9	45370185	45396159	+		Fxyd6	ENSMUSG00000066705	FXYD domain-containing ion transport regulator 6 [Source:MGI Symbol;Acc:MGI:1890226]	45	2	37	46.6667	1.66667		22.5	4.49185	1.97124e-07
Dscaml1	9	45426628	45753712	+		4833428L15Rik	ENSMUSG00000097074	RIKEN cDNA 4833428L15 gene [Source:MGI Symbol;Acc:MGI:1921852]	369	26.3333	48	269.667	344.333		14.0127	3.80866	3.55576e-15
Bace1	9	45838580	45864399	+		Bace1	ENSMUSG00000032086	beta-site APP cleaving enzyme 1 [Source:MGI Symbol;Acc:MGI:1346542]	378	244.667	302.333	293.667	438.667		1.54496	0.627569	0.0433253
AC122273.2	9	45930112	45933738	+		Tagln	ENSMUSG00000032085	transgelin [Source:MGI Symbol;Acc:MGI:106012]	77	177.667	89.3333	83	104.667		0.433396	-1.20624	0.047181
Nxpe4	9	48162023	48400025	+		Nxpe4	ENSMUSG00000044229	neurexophilin and PC-esterase domain family, member 4 [Source:MGI Symbol;Acc:MGI:1924792]	910	454.333	361	443.667	809		2.00293	1.00212	1.12543e-07
Ttc12	9	49436963	49486225	-		Ttc12	ENSMUSG00000040219	tetratricopeptide repeat domain 12 [Source:MGI Symbol;Acc:MGI:2444588]	54.6667	16	15.6667	22	42		3.41667	1.77259	0.00125003
2010007H06Rik	9	51278513	51284210	+		Colca2	ENSMUSG00000079559	COLCA2 homolog [Source:MGI Symbol;Acc:MGI:2685530]	208	115.667	113.667	91	199.667		1.79827	0.84661	0.00164496
Ddx10	9	53098635	53248053	-		Ddx10	ENSMUSG00000053289	DEAD (Asp-Glu-Ala-Asp) box polypeptide 10 [Source:MGI Symbol;Acc:MGI:1924841]	619.333	898	889	722.333	936		0.689681	-0.535999	0.00548462
Dmxl2	9	54365158	54501626	-		Dmxl2	ENSMUSG00000041268	Dmx-like 2 [Source:MGI Symbol;Acc:MGI:2444630]	1344	335.333	169	703.333	620		4.00795	2.00287	8.88925e-05
Dnaja4	9	54698873	54716315	+		Dnaja4	ENSMUSG00000032285	DnaJ heat shock protein family (Hsp40) member A4 [Source:MGI Symbol;Acc:MGI:1927638]	102.333	257.667	185.667	142.333	81.6667		0.397154	-1.33223	9.31264e-06
Scaper	9	55549879	55938119	-		Scaper	ENSMUSG00000034007	S phase cyclin A-associated protein in the ER [Source:MGI Symbol;Acc:MGI:1925976]	982.333	535.333	833	850.333	694		1.83499	0.875775	2.78453e-05
Tspan3	9	56131725	56165477	-		Tspan3	ENSMUSG00000032324	tetraspanin 3 [Source:MGI Symbol;Acc:MGI:1928098]	1287.33	611.667	3253	6561	5608.33		2.10463	1.07357	6.54393e-07
Neil1	9	57142800	57148305	-		Neil1	ENSMUSG00000032298	nei endonuclease VIII-like 1 (E. coli) [Source:MGI Symbol;Acc:MGI:1920024]	523	308.333	367	384.667	671.667		1.69622	0.76232	0.00667474
Sema7a	9	57940112	57962865	+		Sema7a	ENSMUSG00000038264	sema domain, immunoglobulin domain (Ig), and GPI membrane anchor, (semaphorin) 7A [Source:MGI Symbol;Acc:MGI:1306826]	1715.33	755.667	5548.33	5916.67	2829.67		2.26996	1.18267	0.00426625
Cd276	9	58524298	58555437	-		Cd276	ENSMUSG00000035914	CD276 antigen [Source:MGI Symbol;Acc:MGI:2183926]	10.6667	38.3333	12	14.6667	41.6667		0.278261	-1.84549	0.0145896
Neo1	9	58874687	59036441	-		Neo1	ENSMUSG00000032340	neogenin [Source:MGI Symbol;Acc:MGI:1097159]	71.6667	26.3333	55.6667	56.6667	27		2.72152	1.44441	0.0310542
Adpgk	9	59291558	59324052	+		Adpgk	ENSMUSG00000025236	ADP-dependent glucokinase [Source:MGI Symbol;Acc:MGI:1919391]	691.333	975.667	1213.67	1984.33	1709.33		0.708575	-0.497007	0.0126547
Senp8	9	59734259	59750710	-		Senp8	ENSMUSG00000051705	SUMO/sentrin specific peptidase 8 [Source:MGI Symbol;Acc:MGI:1918849]	191.667	86.3333	153.333	141	142.667		2.22008	1.15061	0.00115608
Lrrc49	9	60568859	60688158	-		Lrrc49	ENSMUSG00000047766	leucine rich repeat containing 49 [Source:MGI Symbol;Acc:MGI:2442689]	103.667	30.6667	88	70.3333	42.3333		3.38043	1.75721	3.22802e-05
Smad6	9	63953076	64022059	-		Smad6	ENSMUSG00000036867	SMAD family member 6 [Source:MGI Symbol;Acc:MGI:1336883]	135.333	19	31.6667	38	105		7.12281	2.83245	0.000806502
Pdcd7	9	65346104	65359643	+		Pdcd7	ENSMUSG00000041837	programmed cell death 7 [Source:MGI Symbol;Acc:MGI:1859170]	335	452	549	439.667	655.333		0.74115	-0.432162	0.0423138
Rasl12	9	65398506	65414853	+		Rasl12	ENSMUSG00000041696	RAS-like, family 12 [Source:MGI Symbol;Acc:MGI:1918034]	1.66667	155.333	10.3333	4	18.6667		0.0107296	-6.54226	1.63576e-12
Pclaf	9	65890237	65903266	+		Trip4	ENSMUSG00000032386	thyroid hormone receptor interactor 4 [Source:MGI Symbol;Acc:MGI:1928469]	223	424.667	883.333	377.667	523.667		0.525118	-0.929287	0.000105261
Csnk1g1	9	65908924	66045015	+		Csnk1g1	ENSMUSG00000032384	casein kinase 1, gamma 1 [Source:MGI Symbol;Acc:MGI:2660884]	1165	788.667	985.667	830.333	1421		1.47718	0.562842	0.00659734
Snx22	9	66065176	66069719	-		Ppib	ENSMUSG00000032383	peptidylprolyl isomerase B [Source:MGI Symbol;Acc:MGI:97750]	553	925.667	3891.67	4345.67	2999.67		0.597407	-0.743213	0.00344461
Dapk2	9	66158223	66272242	+		Dapk2	ENSMUSG00000032380	death-associated protein kinase 2 [Source:MGI Symbol;Acc:MGI:1341297]	480.333	200.667	626.333	702	90.6667		2.39369	1.25923	0.000173082
Car12	9	66713686	66766845	+		Car12	ENSMUSG00000032373	carbonic anhydrase 12 [Source:MGI Symbol;Acc:MGI:1923709]	5	30	8.33333	4	5		0.166667	-2.58496	0.0160644
Tpm1	9	67022590	67049406	-		Tpm1	ENSMUSG00000032366	tropomyosin 1, alpha [Source:MGI Symbol;Acc:MGI:98809]	1061	627	1041.67	1392.33	2673.67		1.69219	0.758887	2.0891e-06
Vps13c	9	67840396	67995638	+		Vps13c	ENSMUSG00000035284	vacuolar protein sorting 13C [Source:MGI Symbol;Acc:MGI:2444207]	1443	601.333	936	701.333	1131.33		2.39967	1.26283	0.00400619
Fam81a	9	70088511	70142560	-		Fam81a	ENSMUSG00000032224	family with sequence similarity 81, member A [Source:MGI Symbol;Acc:MGI:1924136]	54.3333	14	6.66667	11.3333	5.33333		3.88095	1.95641	0.0011974
Ccnb2	9	70407692	70421547	-		Ccnb2	ENSMUSG00000032218	cyclin B2 [Source:MGI Symbol;Acc:MGI:88311]	155	301.333	343	245	166		0.514381	-0.959092	0.0457038
Lipc	9	70798128	70952226	-		Lipc	ENSMUSG00000032207	lipase, hepatic [Source:MGI Symbol;Acc:MGI:96216]	382.667	87.6667	1123.33	1409.67	69.6667		4.36502	2.12599	1.17699e-10
Aqp9	9	71110659	71168682	-		Aqp9	ENSMUSG00000032204	aquaporin 9 [Source:MGI Symbol;Acc:MGI:1891066]	54	190.667	60.6667	68	24.6667		0.283217	-1.82002	0.000284588
Gcom1	9	71479325	71592265	-		Polr2m	ENSMUSG00000032199	polymerase (RNA) II (DNA directed) polypeptide M [Source:MGI Symbol;Acc:MGI:107282]	273	373	916.333	665.333	829		0.731903	-0.450275	0.0314945
Cgnl1	9	71626509	71771602	-		Cgnl1	ENSMUSG00000032232	cingulin-like 1 [Source:MGI Symbol;Acc:MGI:1915428]	226.333	22	17.3333	53.6667	14.6667		10.2879	3.36287	1.27994e-17
Mns1	9	72438011	72462025	+		Mns1	ENSMUSG00000032221	meiosis-specific nuclear structural protein 1 [Source:MGI Symbol;Acc:MGI:107933]	155.667	364.667	137.333	95.6667	201		0.426874	-1.22812	0.033715
Gm36948	9	72440760	72444006	+		Mns1	ENSMUSG00000032221	meiosis-specific nuclear structural protein 1 [Source:MGI Symbol;Acc:MGI:107933]	0	8	0.666667	0	7.33333		0	#NUM!	0.0318427
Tmod2	9	75565621	75611325	-		Tmod2	ENSMUSG00000032186	tropomodulin 2 [Source:MGI Symbol;Acc:MGI:1355335]	557.667	84	544.667	572	672.667		6.63889	2.73094	2.11723e-09
Fbxo9	9	78081499	78109065	-		Fbxo9	ENSMUSG00000001366	f-box protein 9 [Source:MGI Symbol;Acc:MGI:1918788]	384.333	548	704.333	685	755.667		0.701338	-0.511818	0.0179089
Gsta4	9	78182774	78209349	+		Gsta4	ENSMUSG00000032348	glutathione S-transferase, alpha 4 [Source:MGI Symbol;Acc:MGI:1309515]	15.6667	58	1.66667	2.66667	3.66667		0.270115	-1.88835	0.00192194
Ddx43	9	78395777	78423587	+		4930542C12Rik	ENSMUSG00000090724	RIKEN cDNA 4930542C12 gene [Source:MGI Symbol;Acc:MGI:1914898]	4	113.333	11	10.6667	11.6667		0.0352941	-4.82443	3.32889e-15
Slc17a5	9	78536488	78588041	-		Slc17a5	ENSMUSG00000049624	solute carrier family 17 (anion/sugar transporter), member 5 [Source:MGI Symbol;Acc:MGI:1924105]	482.333	276.667	254.667	253.333	446		1.74337	0.801882	0.00108178
Myo6	9	80165031	80311729	+		Myo6	ENSMUSG00000033577	myosin VI [Source:MGI Symbol;Acc:MGI:104785]	166.333	346	232.333	220.667	98.6667		0.480732	-1.05669	0.0117931
Hmgn3	9	83109948	83146685	-		Hmgn3	ENSMUSG00000066456	high mobility group nucleosomal binding domain 3 [Source:MGI Symbol;Acc:MGI:2138069]	466	280.667	917.667	1078.67	1036.67		1.66033	0.731472	0.00210167
Sh3bgrl2	9	83548327	83638801	+		Sh3bgrl2	ENSMUSG00000032261	SH3 domain binding glutamic acid-rich protein like 2 [Source:MGI Symbol;Acc:MGI:1915350]	854.333	227.667	525.667	547.333	589		3.75256	1.90788	2.78024e-15
Bckdhb	9	83925145	84124240	+		Bckdhb	ENSMUSG00000032263	branched chain ketoacid dehydrogenase E1, beta polypeptide [Source:MGI Symbol;Acc:MGI:88137]	196.667	97.3333	144	176.667	117.333		2.02055	1.01475	0.0109564
Me1	9	86581371	86695953	-		Me1	ENSMUSG00000032418	malic enzyme 1, NADP(+)-dependent, cytosolic [Source:MGI Symbol;Acc:MGI:97043]	26.6667	3.66667	12.6667	25.3333	25.3333		7.27273	2.8625	0.0109641
Cyb5r4	9	87022014	87077774	+		Cyb5r4	ENSMUSG00000032872	cytochrome b5 reductase 4 [Source:MGI Symbol;Acc:MGI:2386848]	448.333	783.667	1955	1791	1578		0.572097	-0.805668	0.000811154
9330159M07Rik	9	88840236	88858870	-		Trim43c	ENSMUSG00000067399	tripartite motif-containing 43C [Source:MGI Symbol;Acc:MGI:3647365]	53.6667	19	21.6667	34.3333	21.6667		2.82456	1.49803	0.0250621
Gm2396	9	88878994	88937342	-		Gm26611	ENSMUSG00000097677	predicted gene, 26611 [Source:MGI Symbol;Acc:MGI:5477105]	109.667	6	4	7	26		18.2778	4.19202	4.1051e-15
Trim43b	9	89084624	89092835	-		Trim43b	ENSMUSG00000079162	tripartite motif-containing 43B [Source:MGI Symbol;Acc:MGI:3648996]	55.6667	2.66667	17.3333	26	21.6667		20.875	4.3837	8.16321e-05
AC121793.2	9	89550698	89560384	-		AC121793.2	ENSMUSG00000111806	No description	8.66667	0	0	0	0		#DIV/0!	#DIV/0!	0.0210495
Adamts7	9	90163069	90208071	+		Adamts7	ENSMUSG00000032363	a disintegrin-like and metallopeptidase (reprolysin type) with thrombospondin type 1 motif, 7 [Source:MGI Symbol;Acc:MGI:1347346]	86.3333	28.6667	103	115	94.3333		3.01163	1.59054	0.00716702
Tbc1d2b	9	90202027	90270804	-		Adamts7	ENSMUSG00000032363	a disintegrin-like and metallopeptidase (reprolysin type) with thrombospondin type 1 motif, 7 [Source:MGI Symbol;Acc:MGI:1347346]	1073	1494.33	732.667	1296.33	1238.67		0.718046	-0.477852	0.011919
Plscr1	9	92249750	92272278	+		Plscr1	ENSMUSG00000032369	phospholipid scramblase 1 [Source:MGI Symbol;Acc:MGI:893575]	677.667	289	1278.33	1451.67	876.667		2.34487	1.22951	3.94004e-07
Plscr4	9	92457373	92492456	+		Plscr4	ENSMUSG00000032377	phospholipid scramblase 4 [Source:MGI Symbol;Acc:MGI:2143267]	18.6667	99	44.6667	31.3333	17.6667		0.188552	-2.40696	3.02544e-08
Slc9a9	9	94669909	95230445	+		Slc9a9	ENSMUSG00000031129	solute carrier family 9 (sodium/hydrogen exchanger), member 9 [Source:MGI Symbol;Acc:MGI:2679732]	547.333	872.667	299.333	205	425		0.627196	-0.673011	0.000170804
Paqr9	9	95559657	95568023	+		Paqr9	ENSMUSG00000064225	progestin and adipoQ receptor family member IX [Source:MGI Symbol;Acc:MGI:1922802]	368.667	790.333	148.333	99.3333	573.333		0.46647	-1.10014	1.81069e-05
Xrn1	9	95954760	96057803	+		Gm16794	ENSMUSG00000097777	predicted gene, 16794 [Source:MGI Symbol;Acc:MGI:4439718]	1488	1152	1835.67	1141.67	1861.33		1.29167	0.369234	0.0315867
Tfdp2	9	96196275	96323646	+		Tfdp2	ENSMUSG00000032411	transcription factor Dp 2 [Source:MGI Symbol;Acc:MGI:107167]	467.667	727.333	579.667	539	600.333		0.642988	-0.637136	0.0302925
Pxylp1	9	96823336	96892669	-		Pxylp1	ENSMUSG00000043587	2-phosphoxylose phosphatase 1 [Source:MGI Symbol;Acc:MGI:2442444]	21	191.667	90.3333	69.3333	112.667		0.109565	-3.19014	2.09175e-16
Dbr1	9	99575799	99584501	+		Dbr1	ENSMUSG00000032469	debranching RNA lariats 1 [Source:MGI Symbol;Acc:MGI:1931520]	305.333	435	599.667	408.333	550		0.701916	-0.51063	0.0168357
1300017J02Rik	9	103250521	103305082	-		1300017J02Rik	ENSMUSG00000033688	RIKEN cDNA 1300017J02 gene [Source:MGI Symbol;Acc:MGI:1919025]	9	77.6667	19.6667	11.6667	2.33333		0.11588	-3.1093	0.00953264
5830418P13Rik	9	103423578	103461260	+		5830418P13Rik	ENSMUSG00000086236	RIKEN cDNA 5830418P13 gene [Source:MGI Symbol;Acc:MGI:3604110]	26.3333	73	63.6667	71.3333	76		0.360731	-1.47101	0.0108156
Bfsp2	9	103424924	103480420	-		5830418P13Rik	ENSMUSG00000086236	RIKEN cDNA 5830418P13 gene [Source:MGI Symbol;Acc:MGI:3604110]	70.6667	130.667	193.667	247.667	184		0.540816	-0.886789	0.0453907
Cpne4	9	104547286	105034544	+		Cpne4	ENSMUSG00000032564	copine IV [Source:MGI Symbol;Acc:MGI:1921270]	11	44.3333	1.66667	1	0.666667		0.24812	-2.01089	0.00526513
Alas1	9	106233455	106248654	-		Alas1	ENSMUSG00000032786	aminolevulinic acid synthase 1 [Source:MGI Symbol;Acc:MGI:87989]	683	432	1155	2110.67	1294		1.58102	0.660854	0.015756
Pcbp4	9	106453291	106464012	+		Pcbp4	ENSMUSG00000023495	poly(rC) binding protein 4 [Source:MGI Symbol;Acc:MGI:1890471]	497.333	97	271	684	723.333		5.12715	2.35816	7.19878e-16
Dock3	9	106892825	107231909	-		4930524O07Rik	ENSMUSG00000090207	RIKEN cDNA 4930524O07 gene [Source:MGI Symbol;Acc:MGI:1915514]	32.3333	9.66667	14	25.3333	29		3.34483	1.74193	0.0138385
Cish	9	107296026	107302784	+		Gm17040	ENSMUSG00000091366	predicted gene 17040 [Source:MGI Symbol;Acc:MGI:4937867]	433	252.333	342.333	403	183.333		1.71598	0.779036	0.0331551
Hemk1	9	107327084	107338350	-		Hemk1	ENSMUSG00000032579	HemK methyltransferase family member 1 [Source:MGI Symbol;Acc:MGI:1916786]	271	133.667	421.333	269.333	241.667		2.02743	1.01965	2.1661e-05
Hyal1	9	107576927	107581710	+		Gm16343	ENSMUSG00000089935	predicted gene 16343 [Source:MGI Symbol;Acc:MGI:3840128]	390.333	72.3333	59	98.3333	326.333		5.39631	2.43197	5.50139e-09
Nat6	9	107578887	107584050	+		Gm16343	ENSMUSG00000089935	predicted gene 16343 [Source:MGI Symbol;Acc:MGI:3840128]	487	181	416	496	764		2.69061	1.42793	1.41916e-07
Sema3b	9	107597674	107609229	-		Sema3b	ENSMUSG00000057969	sema domain, immunoglobulin domain (Ig), short basic domain, secreted, (semaphorin) 3B [Source:MGI Symbol;Acc:MGI:107561]	51.3333	7.66667	5.66667	17.3333	12.3333		6.69565	2.74322	0.00218121
Slc38a3	9	107650634	107669530	-		Slc38a3	ENSMUSG00000010064	solute carrier family 38, member 3 [Source:MGI Symbol;Acc:MGI:1923507]	58	0.333333	0	1.33333	0.666667		174	7.44294	1.96779e-06
Sema3f	9	107681500	107710475	-		Sema3f	ENSMUSG00000034684	sema domain, immunoglobulin domain (Ig), short basic domain, secreted, (semaphorin) 3F [Source:MGI Symbol;Acc:MGI:1096347]	269.667	21.6667	20	68	44.3333		12.4462	3.63763	2.73815e-16
Uba7	9	107975505	107984060	+		Uba7	ENSMUSG00000032596	ubiquitin-like modifier activating enzyme 7 [Source:MGI Symbol;Acc:MGI:1349462]	2555	1373.33	5137.33	5008	7481		1.86044	0.895641	0.035517
Nicn1	9	108290429	108296498	+		Nicn1	ENSMUSG00000032606	nicolin 1 [Source:MGI Symbol;Acc:MGI:1913507]	197.667	89.3333	259.333	259.667	173.333		2.21269	1.1458	0.0052855
Amt	9	108296853	108302302	+		Amt	ENSMUSG00000032607	aminomethyltransferase [Source:MGI Symbol;Acc:MGI:3646700]	91.3333	35	42	52.3333	95.6667		2.60952	1.38379	0.000371635
Klhdc8b	9	108447636	108461581	-		Klhdc8b	ENSMUSG00000032609	kelch domain containing 8B [Source:MGI Symbol;Acc:MGI:1925517]	204.667	57	91.3333	118.667	207.333		3.59064	1.84424	1.05914e-06
Ccdc71	9	108460527	108465938	+		Klhdc8b	ENSMUSG00000032609	kelch domain containing 8B [Source:MGI Symbol;Acc:MGI:1925517]	681	500.333	1235	1242.67	1303		1.36109	0.444765	0.028898
4833445I07Rik	9	108567533	108569174	+		4833445I07Rik	ENSMUSG00000103103	RIKEN cDNA 4833445I07 gene [Source:MGI Symbol;Acc:MGI:2143268]	72.3333	28.6667	42	48.3333	81.6667		2.52326	1.33529	0.00763334
Wdr6	9	108572311	108578739	-		Dalrd3	ENSMUSG00000019039	DALR anticodon binding domain containing 3 [Source:MGI Symbol;Acc:MGI:1915039]	1217.33	858	2837.67	2543.67	2705		1.4188	0.504675	0.0257178
Pfkfb4	9	108991778	109032228	+		Pfkfb4	ENSMUSG00000025648	6-phosphofructo-2-kinase/fructose-2,6- biphosphatase 4 [Source:MGI Symbol;Acc:MGI:2687284]	655	411	687.333	1136.33	851.333		1.59367	0.672357	0.00051328
Fbxw13	9	109179227	109195975	-		Fbxw13	ENSMUSG00000049314	F-box and WD-40 domain protein 13 [Source:MGI Symbol;Acc:MGI:3505590]	0	10.6667	3.66667	0.333333	19		0	#NUM!	0.013763
Camp	9	109847379	109849617	-		Camp	ENSMUSG00000038357	cathelicidin antimicrobial peptide [Source:MGI Symbol;Acc:MGI:108443]	18.6667	137.667	841.667	9423.33	12.3333		0.135593	-2.88264	1.81549e-10
Cdc25a	9	109875579	109893895	+		Cdc25a	ENSMUSG00000032477	cell division cycle 25A [Source:MGI Symbol;Acc:MGI:103198]	349.667	476	507.667	226.667	396.667		0.734594	-0.444981	0.0492516
Map4	9	109931460	110083955	+		Map4	ENSMUSG00000032479	microtubule-associated protein 4 [Source:MGI Symbol;Acc:MGI:97178]	2383.33	1415.67	3748.33	4289.33	4650.67		1.68354	0.751499	2.39635e-06
Ngp	9	110419747	110423012	+		Ngp	ENSMUSG00000032484	neutrophilic granule protein [Source:MGI Symbol;Acc:MGI:105983]	104	437	1886.33	25591.3	46.6667		0.237986	-2.07105	2.97534e-19
Kif9	9	110476958	110525179	+		Kif9	ENSMUSG00000032489	kinesin family member 9 [Source:MGI Symbol;Acc:MGI:1098237]	98	183	163	124.333	111.333		0.535519	-0.90099	0.0491981
Prss50	9	110857967	110864629	+		Prss50	ENSMUSG00000048752	protease, serine 50 [Source:MGI Symbol;Acc:MGI:2447303]	0.333333	18.6667	0	1.33333	0		0.0178571	-5.80735	0.0253234
Ltf	9	111019271	111042767	+		Ltf	ENSMUSG00000032496	lactotransferrin [Source:MGI Symbol;Acc:MGI:96837]	55.6667	325.333	561.333	10149.7	24.3333		0.171107	-2.54703	1.06644e-17
Clasp2	9	113741473	113919682	+		Clasp2	ENSMUSG00000033392	CLIP associating protein 2 [Source:MGI Symbol;Acc:MGI:1923749]	1994.67	944	1389.33	1403	2112.33		2.11299	1.07929	0.00069632
Gpd1l	9	114899341	114933987	-		Gpd1l	ENSMUSG00000050627	glycerol-3-phosphate dehydrogenase 1-like [Source:MGI Symbol;Acc:MGI:1289257]	970.333	1369.67	1930.33	1481.67	3282.67		0.708445	-0.497272	0.0283926
AC131777.2	9	116218802	116249753	+		AC131777.2	ENSMUSG00000111324	No description	40.6667	1.66667	9.66667	13.3333	3.33333		24.4	4.60881	5.24536e-06
Eomes	9	118478212	118486132	+		Eomes	ENSMUSG00000032446	eomesodermin [Source:MGI Symbol;Acc:MGI:1201683]	41.6667	1438.33	370.667	125.667	227.333		0.0289687	-5.10936	7.42641e-25
Gm33460	9	118485559	118489099	-		Eomes	ENSMUSG00000032446	eomesodermin [Source:MGI Symbol;Acc:MGI:1201683]	2.33333	98.6667	23	8	11.6667		0.0236486	-5.4021	4.52515e-11
Itga9	9	118606690	118901003	+		Itga9	ENSMUSG00000039115	integrin alpha 9 [Source:MGI Symbol;Acc:MGI:104756]	1729.33	1070.33	148	175	1029.67		1.6157	0.692156	0.000785305
Ctdspl	9	118926453	119043998	+		Gm2415	ENSMUSG00000086119	predicted gene 2415 [Source:MGI Symbol;Acc:MGI:3780582]	83.3333	25	32.6667	39.6667	13		3.33333	1.73697	0.0034959
Ttc21a	9	119937606	119967793	+		Cx3cr1	ENSMUSG00000052336	chemokine (C-X3-C motif) receptor 1 [Source:MGI Symbol;Acc:MGI:1333815]	26.6667	2	1.66667	5.66667	7.66667		13.3333	3.73697	0.00347375
Csrnp1	9	119971163	119984658	-		Cx3cr1	ENSMUSG00000052336	chemokine (C-X3-C motif) receptor 1 [Source:MGI Symbol;Acc:MGI:1333815]	1042	1408.33	1927	1933.67	2709.33		0.739882	-0.434634	0.00542845
AC137127.3	9	120674405	120682399	+		AC137127.3	ENSMUSG00000111533	No description	0.666667	20.3333	0	0.333333	0.333333		0.0327869	-4.93074	0.000687959
Vipr1	9	121642716	121672954	+		Vipr1	ENSMUSG00000032528	vasoactive intestinal peptide receptor 1 [Source:MGI Symbol;Acc:MGI:109272]	143.333	451.333	111.333	139.667	498.333		0.317578	-1.65482	0.000253218
Ackr2	9	121898355	121911074	+		Ackr2	ENSMUSG00000044534	atypical chemokine receptor 2 [Source:MGI Symbol;Acc:MGI:1891697]	469.667	152	1352	1672.67	73.3333		3.08991	1.62757	0.000402404
1700048O20Rik	9	121937223	121947016	+		1700048O20Rik	ENSMUSG00000043773	RIKEN cDNA 1700048O20 gene [Source:MGI Symbol;Acc:MGI:1920637]	157.333	42	53.3333	54.3333	44.3333		3.74603	1.90536	6.41222e-06
Cdcp1	9	123170824	123216038	-		Cdcp1	ENSMUSG00000035498	CUB domain containing protein 1 [Source:MGI Symbol;Acc:MGI:2442010]	799	152.667	56.3333	201.667	819.667		5.23362	2.38781	5.90198e-07
Tmem158	9	123259053	123260764	-		Tmem158	ENSMUSG00000054871	transmembrane protein 158 [Source:MGI Symbol;Acc:MGI:1919559]	119.333	33.3333	38.3333	153.667	330		3.58	1.83996	1.89781e-05
Ccr9	9	123678439	123784330	+		Slc6a20a	ENSMUSG00000036814	solute carrier family 6 (neurotransmitter transporter), member 20A [Source:MGI Symbol;Acc:MGI:2143217]	616.667	944.333	1292.33	1471.33	2406		0.653018	-0.614805	0.0341545
Xcr1	9	123852315	123862029	-		Xcr1	ENSMUSG00000060509	chemokine (C motif) receptor 1 [Source:MGI Symbol;Acc:MGI:1346338]	104.667	497.667	39.6667	70.3333	60		0.210315	-2.24938	8.48869e-08
Ccr1	9	123962124	123968692	-		Ccr1	ENSMUSG00000025804	chemokine (C-C motif) receptor 1 [Source:MGI Symbol;Acc:MGI:104618]	514.667	325	1292	2075.67	415.667		1.58359	0.663199	0.0266006
Ccr1l1	9	123977243	123978408	-		Ccr1l1	ENSMUSG00000064039	chemokine (C-C motif) receptor 1-like 1 [Source:MGI Symbol;Acc:MGI:104617]	3	17.3333	3.66667	0.333333	2.33333		0.173077	-2.53051	0.0378091
Ccr3	9	124021972	124031689	+		Ccr3	ENSMUSG00000035448	chemokine (C-C motif) receptor 3 [Source:MGI Symbol;Acc:MGI:104616]	409.667	1200	67	29	350		0.341389	-1.55051	1.60201e-09
Ccr2	9	124101950	124113557	+		Ccr2	ENSMUSG00000049103	chemokine (C-C motif) receptor 2 [Source:MGI Symbol;Acc:MGI:106185]	438	1628	1253.67	255	1029.67		0.269042	-1.8941	5.45488e-25
2010315B03Rik	9	124291804	124312696	-		2010315B03Rik	ENSMUSG00000074829	RIKEN cDNA 2010315B03 gene [Source:MGI Symbol;Acc:MGI:1919321]	564	314	505.667	511	761.333		1.79618	0.844931	0.00348023
Plekhg1	10	3740364	3967303	+		Plekhg1	ENSMUSG00000040624	pleckstrin homology domain containing, family G (with RhoGef domain) member 1 [Source:MGI Symbol;Acc:MGI:2676551]	380	65.3333	198.667	442	207		5.81633	2.54011	1.137e-06
Zbtb2	10	4367075	4388108	-		Zbtb2	ENSMUSG00000075327	zinc finger and BTB domain containing 2 [Source:MGI Symbol;Acc:MGI:2685949]	333.667	795.333	569.667	465.667	717.333		0.419531	-1.25315	0.00552796
Fbxo5	10	5799160	5805600	-		Fbxo5	ENSMUSG00000019773	F-box protein 5 [Source:MGI Symbol;Acc:MGI:1914391]	179.333	292.333	247.333	184.667	285.667		0.613455	-0.704971	0.0279974
Ipcef1	10	6885796	7052478	-		Oprm1	ENSMUSG00000000766	opioid receptor, mu 1 [Source:MGI Symbol;Acc:MGI:97441]	698.667	1720.67	1543.33	1413.33	995		0.406044	-1.30029	0.000251705
Cnksr3	10	7119063	7212237	-		Cnksr3	ENSMUSG00000015202	Cnksr family member 3 [Source:MGI Symbol;Acc:MGI:2674130]	159.333	385	129.333	117.667	238.333		0.413853	-1.27281	2.82363e-06
Lrp11	10	7589800	7625483	+		Lrp11	ENSMUSG00000019796	low density lipoprotein receptor-related protein 11 [Source:MGI Symbol;Acc:MGI:2442989]	127	49	103	68	98.3333		2.59184	1.37397	0.000261865
Zc3h12d	10	7832470	7870396	+		Zc3h12d	ENSMUSG00000039981	zinc finger CCCH type containing 12D [Source:MGI Symbol;Acc:MGI:3045313]	1394.33	908.667	3758.67	2678	3327		1.53448	0.617752	0.000405769
Sash1	10	8722219	8886070	-		Sash1	ENSMUSG00000015305	SAM and SH3 domain containing 1 [Source:MGI Symbol;Acc:MGI:1917347]	1645.33	1112.67	330.667	373	1101.33		1.47873	0.564359	0.000502266
Stxbp5	10	9755547	9901079	-		Stxbp5	ENSMUSG00000019790	syntaxin binding protein 5 (tomosyn) [Source:MGI Symbol;Acc:MGI:1926058]	1016.67	702	1001	1386	1098.33		1.44824	0.534304	0.00623348
Adgb	10	10335703	10472326	-		Adgb	ENSMUSG00000050994	androglobin [Source:MGI Symbol;Acc:MGI:3605549]	117.667	17	7	37.3333	56.3333		6.92157	2.7911	1.45405e-06
Ltv1	10	13178140	13193168	-		Ltv1	ENSMUSG00000019814	LTV1 ribosome biogenesis factor [Source:MGI Symbol;Acc:MGI:2447810]	474.333	665.333	768.667	502.667	872.333		0.712926	-0.488176	0.00923838
Aig1	10	13647054	13868980	-		Aig1	ENSMUSG00000019806	androgen-induced 1 [Source:MGI Symbol;Acc:MGI:1913503]	168.667	319.667	209	268.333	171.333		0.527633	-0.922393	0.000965711
Adgrg6	10	14402583	14545179	-		Adgrg6	ENSMUSG00000039116	adhesion G protein-coupled receptor G6 [Source:MGI Symbol;Acc:MGI:1916151]	1403	233.667	3301.67	839.333	1574		6.00428	2.58599	1.70425e-07
AC118202.1	10	14544490	14551031	+		Adgrg6	ENSMUSG00000039116	adhesion G protein-coupled receptor G6 [Source:MGI Symbol;Acc:MGI:1916151]	36.6667	8.66667	166.667	45.3333	73.3333		4.23077	2.08092	0.00525856
Txlnb	10	17796226	17845665	+		Gm20655	ENSMUSG00000093672	predicted gene 20655 [Source:MGI Symbol;Acc:MGI:5313102]	66.6667	25.3333	38.3333	54	16.6667		2.63158	1.39593	0.0235215
Tnfaip3	10	19000910	19015657	-		Tnfaip3	ENSMUSG00000019850	tumor necrosis factor, alpha-induced protein 3 [Source:MGI Symbol;Acc:MGI:1196377]	2184.33	3158.67	4346.33	3666	4251.67		0.691536	-0.532123	0.00347048
AC153862.2	10	19486715	19507311	+		AC153862.2	ENSMUSG00000110902	No description	43.3333	100.667	9.33333	21	26		0.430464	-1.21604	0.00131944
Il22ra2	10	19621998	19634681	+		Il22ra2	ENSMUSG00000039760	interleukin 22 receptor, alpha 2 [Source:MGI Symbol;Acc:MGI:2665114]	1	11	0	0.333333	0		0.0909091	-3.45943	0.0384998
Pde7b	10	20398004	20725078	-		Pde7b	ENSMUSG00000019990	phosphodiesterase 7B [Source:MGI Symbol;Acc:MGI:1352752]	376.667	31.3333	72	85.3333	42.3333		12.0213	3.58752	5.43512e-28
Gm26740	10	22187013	22302835	-		Raet1e	ENSMUSG00000053219	retinoic acid early transcript 1E [Source:MGI Symbol;Acc:MGI:2675273]	219.667	129.333	139.667	163	387.333		1.69845	0.764222	0.0206956
Eya4	10	23102963	23350786	-		Eya4	ENSMUSG00000010461	EYA transcriptional coactivator and phosphatase 4 [Source:MGI Symbol;Acc:MGI:1337104]	16	0.333333	2	5.33333	12.3333		48	5.58496	0.00472751
Moxd1	10	24223517	24302790	+		Moxd1	ENSMUSG00000020000	monooxygenase, DBH-like 1 [Source:MGI Symbol;Acc:MGI:1921582]	34.3333	0	2	3.33333	0		#DIV/0!	#DIV/0!	1.18793e-06
Arg1	10	24915221	24927484	-		Arg1	ENSMUSG00000019987	arginase, liver [Source:MGI Symbol;Acc:MGI:88070]	328.333	10.6667	1.66667	18.6667	33		30.7812	4.94398	1.55413e-36
Samd3	10	26229707	26272172	+		Samd3	ENSMUSG00000051354	sterile alpha motif domain containing 3 [Source:MGI Symbol;Acc:MGI:2685469]	35	673.667	30	37.3333	112.667		0.0519545	-4.26661	2.33118e-19
Rnf217	10	31493193	31609184	-		Rnf217	ENSMUSG00000063760	ring finger protein 217 [Source:MGI Symbol;Acc:MGI:3610311]	137	37.6667	60.6667	106	88		3.63717	1.86282	1.56314e-05
Fam26f	10	34126067	34127984	-		Fam26f	ENSMUSG00000046031	family with sequence similarity 26, member F [Source:MGI Symbol;Acc:MGI:2443082]	95.6667	219.333	292	306	295.333		0.43617	-1.19704	0.0273795
Tspyl1	10	34282190	34285275	+		Tspyl1	ENSMUSG00000047514	testis-specific protein, Y-encoded-like 1 [Source:MGI Symbol;Acc:MGI:1298395]	881	1256.33	1971.67	1568.67	2020.67		0.701247	-0.512005	0.00984808
Frk	10	34483399	34611278	+		Frk	ENSMUSG00000019779	fyn-related kinase [Source:MGI Symbol;Acc:MGI:103265]	13.3333	1.66667	0	0.666667	4		8	3	0.0385924
Marcks	10	37133375	37138920	-		Marcks	ENSMUSG00000069662	myristoylated alanine rich protein kinase C substrate [Source:MGI Symbol;Acc:MGI:96907]	2883.33	1983	8215.67	9287.33	12081.7		1.45403	0.540053	0.0105622
Gm26535	10	37337486	37379652	+		Gm26535	ENSMUSG00000097742	predicted gene, 26535 [Source:MGI Symbol;Acc:MGI:5477029]	118.333	8	37.3333	34	99.3333		14.7917	3.88671	1.17801e-07
Fyn	10	39368855	39565381	+		Fyn	ENSMUSG00000019843	Fyn proto-oncogene [Source:MGI Symbol;Acc:MGI:95602]	1267	2176.33	3920.33	2951.67	3939.33		0.582172	-0.780483	0.00121849
Smpd2	10	41485642	41490369	-		Mical1	ENSMUSG00000019823	microtubule associated monooxygenase, calponin and LIM domain containing 1 [Source:MGI Symbol;Acc:MGI:2385847]	475.667	747.333	814.667	1197.33	1456		0.636485	-0.651801	0.0461969
Scml4	10	42860370	42960780	+		Scml4	ENSMUSG00000044770	sex comb on midleg-like 4 (Drosophila) [Source:MGI Symbol;Acc:MGI:2446140]	482	757.333	970.333	931.333	1639.67		0.636444	-0.651895	0.0105354
AC153536.3	10	43745809	43765836	+		AC153536.3	ENSMUSG00000111422	No description	57	8	27	35.3333	38		7.125	2.83289	4.15862e-05
Rtn4ip1	10	43901807	43957201	+		Rtn4ip1	ENSMUSG00000019864	reticulon 4 interacting protein 1 [Source:MGI Symbol;Acc:MGI:2178759]	510.333	308.333	672.333	532	580.333		1.65514	0.726949	0.0127945
AC153955.2	10	44597889	44602174	-		AC153955.2	ENSMUSG00000111116	No description	117.333	38	27.6667	31	28.6667		3.08772	1.62654	8.54117e-06
Dcbld1	10	52233619	52321378	+		Dcbld1	ENSMUSG00000019891	discoidin, CUB and LCCL domain containing 1 [Source:MGI Symbol;Acc:MGI:1913936]	134.333	70.3333	110	54.3333	132.333		1.90995	0.933537	0.0148435
Fam184a	10	53633145	53751123	-		Fam184a	ENSMUSG00000019856	family with sequence similarity 184, member A [Source:MGI Symbol;Acc:MGI:1923156]	4.33333	111.333	18	5.66667	6.33333		0.0389222	-4.68326	4.4166e-08
Tbc1d32	10	56014293	56228689	-		Tbc1d32	ENSMUSG00000038122	TBC1 domain family, member 32 [Source:MGI Symbol;Acc:MGI:2442827]	208.333	96.6667	118.333	98.3333	90		2.15517	1.1078	0.000235387
Gja1	10	56377330	56402513	+		Gja1	ENSMUSG00000050953	gap junction protein, alpha 1 [Source:MGI Symbol;Acc:MGI:95713]	162	39	17.3333	17.3333	12		4.15385	2.05445	0.00538167
Hsf2	10	57486385	57513135	+		Hsf2	ENSMUSG00000019878	heat shock factor 2 [Source:MGI Symbol;Acc:MGI:96239]	732	319	861.667	398.333	619.333		2.29467	1.19829	0.000717897
Pkib	10	57631981	57741112	+		Pkib	ENSMUSG00000019876	protein kinase inhibitor beta, cAMP dependent, testis specific [Source:MGI Symbol;Acc:MGI:101937]	867.667	589	1844.33	1764.33	1274		1.47312	0.558873	0.0249502
Fabp7	10	57784881	57788450	+		Fabp7	ENSMUSG00000019874	fatty acid binding protein 7, brain [Source:MGI Symbol;Acc:MGI:101916]	27.6667	0.666667	1.33333	8.66667	34.3333		41.5	5.37504	0.000729481
Micu1	10	59702477	59864132	+		Micu1	ENSMUSG00000020111	mitochondrial calcium uptake 1 [Source:MGI Symbol;Acc:MGI:2384909]	876.333	605.333	1810.67	2485.67	2095		1.44769	0.53375	0.00236915
Cdh23	10	60302748	60696490	-		Cdh23	ENSMUSG00000012819	cadherin 23 (otocadherin) [Source:MGI Symbol;Acc:MGI:1890219]	199.333	32.3333	54	107.333	58.6667		6.16495	2.62409	1.08123e-11
Slc29a3	10	60712072	60752794	-		Slc29a3	ENSMUSG00000020100	solute carrier family 29 (nucleoside transporters), member 3 [Source:MGI Symbol;Acc:MGI:1918529]	1594.33	982	3905.67	2577.33	2803.33		1.62356	0.699158	0.00857774
Adamts14	10	61197112	61273438	-		Adamts14	ENSMUSG00000059901	a disintegrin-like and metallopeptidase (reprolysin type) with thrombospondin type 1 motif, 14 [Source:MGI Symbol;Acc:MGI:2179942]	11	719	48.6667	50.3333	93.6667		0.015299	-6.03042	9.10819e-39
Prf1	10	61297833	61304680	+		Prf1	ENSMUSG00000037202	perforin 1 (pore forming protein) [Source:MGI Symbol;Acc:MGI:97551]	79	1101.67	265.667	242.333	199		0.0717095	-3.80169	1.1771e-35
Tspan15	10	62185396	62231251	-		Tspan15	ENSMUSG00000037031	tetraspanin 15 [Source:MGI Symbol;Acc:MGI:1917673]	80.3333	242	32.3333	28.6667	40.3333		0.331956	-1.59094	0.000396908
Ddx21	10	62580251	62602281	-		Ddx21	ENSMUSG00000020075	DEAD (Asp-Glu-Ala-Asp) box polypeptide 21 [Source:MGI Symbol;Acc:MGI:1860494]	1763.67	2634	4020.33	2649.67	4005.67		0.669577	-0.578677	0.0135225
Dna2	10	62947026	62974185	+		Dna2	ENSMUSG00000036875	DNA replication helicase/nuclease 2 [Source:MGI Symbol;Acc:MGI:2443732]	430	630.333	243.333	169.333	327.333		0.682179	-0.551778	0.0307675
Dnajc12	10	63382443	63410576	+		Dnajc12	ENSMUSG00000036764	DnaJ heat shock protein family (Hsp40) member C12 [Source:MGI Symbol;Acc:MGI:1353428]	372	127	339	458	327.333		2.92913	1.55047	0.00219606
Egr2	10	67535475	67542188	+		Egr2	ENSMUSG00000037868	early growth response 2 [Source:MGI Symbol;Acc:MGI:95296]	213.333	609.667	475.333	487.667	867		0.349918	-1.51491	0.00740414
Zfp365	10	67886103	67912662	-		Zfp365	ENSMUSG00000037855	zinc finger protein 365 [Source:MGI Symbol;Acc:MGI:2143676]	4.33333	30.3333	14.6667	15.3333	18		0.142857	-2.80735	0.0279974
Tmem26	10	68723646	68782650	+		Tmem26	ENSMUSG00000060044	transmembrane protein 26 [Source:MGI Symbol;Acc:MGI:2143537]	1080.67	763.333	131.667	173.667	591.333		1.41572	0.501536	0.0129595
Ccdc6	10	70097121	70193200	+		Ccdc6	ENSMUSG00000048701	coiled-coil domain containing 6 [Source:MGI Symbol;Acc:MGI:1923801]	1633.33	830	2039	1442.67	2154		1.96787	0.976636	1.00359e-05
Tfam	10	71225464	71238280	-		Tfam	ENSMUSG00000003923	transcription factor A, mitochondrial [Source:MGI Symbol;Acc:MGI:107810]	595.333	861.333	1197.33	1058	1386.67		0.691176	-0.532874	0.019503
Gnaz	10	74967177	75016907	+		Rsph14	ENSMUSG00000009070	radial spoke head homolog 14 (Chlamydomonas) [Source:MGI Symbol;Acc:MGI:1918486]	1.66667	29	4.33333	22.3333	5		0.0574713	-4.12102	0.00907514
Adora2a	10	75316877	75334784	+		Adora2a	ENSMUSG00000020178	adenosine A2a receptor [Source:MGI Symbol;Acc:MGI:99402]	957	595	2140.33	2212	2533.33		1.6084	0.685629	0.0370435
Gucd1	10	75351111	75517972	-		AC137067.2	ENSMUSG00000112471	No description	1520	929	3528.67	4485.67	4748.67		1.63617	0.710321	0.000189636
Upb1	10	75401115	75441679	+		Gucd1	ENSMUSG00000033416	guanylyl cyclase domain containing 1 [Source:MGI Symbol;Acc:MGI:1916028]	46.3333	180	413.667	184.333	321		0.257407	-1.95787	9.31264e-06
Gstt3	10	75774115	75781414	-		Gm20441	ENSMUSG00000092360	predicted gene 20441 [Source:MGI Symbol;Acc:MGI:5141906]	182.333	49.6667	180.333	319.667	110.667		3.67114	1.87623	6.97746e-10
Gm867	10	75937723	75940672	-		Chchd10	ENSMUSG00000049422	coiled-coil-helix-coiled-coil-helix domain containing 10 [Source:MGI Symbol;Acc:MGI:2143558]	2	35.3333	2.66667	3.66667	7.33333		0.0566038	-4.14296	0.00254575
Dip2a	10	76259429	76345291	-		S100b	ENSMUSG00000033208	S100 protein, beta polypeptide, neural [Source:MGI Symbol;Acc:MGI:98217]	372.667	180.667	255.667	236	374		2.06273	1.04456	0.00155133
1700009J07Rik	10	77893417	77896114	+		1700009J07Rik	ENSMUSG00000096573	RIKEN cDNA 1700009J07 gene [Source:MGI Symbol;Acc:MGI:1914938]	1.33333	23.6667	0	0.333333	1		0.056338	-4.14975	0.00733349
Lrrc3	10	77897575	77902536	-		Lrrc3	ENSMUSG00000051652	leucine rich repeat containing 3 [Source:MGI Symbol;Acc:MGI:2447899]	18	54.6667	12	15.6667	14.6667		0.329268	-1.60266	0.0124068
Trpm2	10	77907722	77970563	-		Trpm2	ENSMUSG00000009292	transient receptor potential cation channel, subfamily M, member 2 [Source:MGI Symbol;Acc:MGI:1351901]	426.667	1209.33	336	1583.33	263.333		0.352811	-1.50303	1.25749e-09
Agpat3	10	78269178	78352489	-		Agpat3	ENSMUSG00000001211	1-acylglycerol-3-phosphate O-acyltransferase 3 [Source:MGI Symbol;Acc:MGI:1336186]	1012	1427.33	2316.67	2225.33	2033.67		0.709014	-0.496113	0.000640363
Cdc34	10	79682195	79688398	+		Cdc34	ENSMUSG00000020307	cell division cycle 34 [Source:MGI Symbol;Acc:MGI:102657]	357.667	477.667	1293	1378.33	1264.67		0.748779	-0.417389	0.043009
Gzmm	10	79689020	79695261	+		Gzmm	ENSMUSG00000054206	granzyme M (lymphocyte met-ase 1) [Source:MGI Symbol;Acc:MGI:99549]	25.6667	101	24.3333	18	37.3333		0.254125	-1.97639	0.000176118
Efna2	10	80179482	80190010	+		Efna2	ENSMUSG00000003070	ephrin A2 [Source:MGI Symbol;Acc:MGI:102707]	166	10.6667	331.333	215.333	144.333		15.5625	3.96	3.2878e-15
Atp8b3	10	80519584	80539124	-		Atp8b3	ENSMUSG00000003341	ATPase, class I, type 8B, member 3 [Source:MGI Symbol;Acc:MGI:1914581]	130.333	3	11.3333	49.6667	36.3333		43.4444	5.4411	0.00685782
Scamp4	10	80602872	80615783	+		Scamp4	ENSMUSG00000113949	secretory carrier membrane protein 4 [Source:MGI Symbol;Acc:MGI:1928947]	429.667	561.667	1184.33	1064.33	1431.67		0.764985	-0.386496	0.0490426
Adat3	10	80602880	80615784	+		Scamp4	ENSMUSG00000113949	secretory carrier membrane protein 4 [Source:MGI Symbol;Acc:MGI:1928947]	495	649	1267	1133.33	1582.67		0.762712	-0.39079	0.0406978
Gadd45b	10	80930073	80932204	+		Gadd45b	ENSMUSG00000015312	growth arrest and DNA-damage-inducible 45 beta [Source:MGI Symbol;Acc:MGI:107776]	1166	612	4857.33	6123.33	6128		1.90523	0.929964	0.0247968
Atcayos	10	81194609	81210877	+		Atcayos	ENSMUSG00000085779	ataxia, cerebellar, Cayman type, opposite strand [Source:MGI Symbol;Acc:MGI:1916928]	98.6667	10.6667	79.6667	91.6667	37.3333		9.25	3.20945	6.51651e-12
Nmrk2	10	81198170	81202051	-		Atcayos	ENSMUSG00000085779	ataxia, cerebellar, Cayman type, opposite strand [Source:MGI Symbol;Acc:MGI:1916928]	9.33333	0	3	1	1.33333		#DIV/0!	#DIV/0!	0.00845267
Atcay	10	81204508	81230833	-		Atcayos	ENSMUSG00000085779	ataxia, cerebellar, Cayman type, opposite strand [Source:MGI Symbol;Acc:MGI:1916928]	88.6667	16	24.6667	41.6667	58.6667		5.54167	2.47032	0.00119221
Gipc3	10	81335265	81343266	-		Gipc3	ENSMUSG00000034872	GIPC PDZ domain containing family, member 3 [Source:MGI Symbol;Acc:MGI:2387006]	124.333	31.3333	268.333	194.667	137.333		3.96809	1.98844	0.00028138
S1pr4	10	81497747	81500132	-		S1pr4	ENSMUSG00000044199	sphingosine-1-phosphate receptor 4 [Source:MGI Symbol;Acc:MGI:1333809]	460	655	2265	2429.33	3193.33		0.70229	-0.509861	0.018188
1700028I16Rik	10	82812123	82824242	+		1700028I16Rik	ENSMUSG00000056821	RIKEN cDNA 1700028I16 gene [Source:MGI Symbol;Acc:MGI:1917253]	41	8.66667	26	45	12.3333		4.73077	2.24207	0.00554936
Slc41a2	10	83230848	83337882	-		Slc41a2	ENSMUSG00000034591	solute carrier family 41, member 2 [Source:MGI Symbol;Acc:MGI:2442940]	208.667	454.667	359	286.667	428.667		0.458944	-1.12361	0.00607481
Nuak1	10	84370905	84440597	-		Nuak1	ENSMUSG00000020032	NUAK family, SNF1-like kinase, 1 [Source:MGI Symbol;Acc:MGI:1925226]	761	295.333	251.333	200.667	861		2.57675	1.36555	2.66957e-08
Gm17249	10	84618341	84622578	-		Gm17249	ENSMUSG00000097309	predicted gene, 17249 [Source:MGI Symbol;Acc:MGI:4936883]	54.6667	23.6667	32	23	56		2.30986	1.2078	0.0312727
Btbd11	10	85386814	85660292	+		Btbd11	ENSMUSG00000020042	BTB (POZ) domain containing 11 [Source:MGI Symbol;Acc:MGI:1921257]	68.3333	377	82	63	146.333		0.181256	-2.4639	2.94217e-07
Syn3	10	86055125	86498896	-		Syn3	ENSMUSG00000059602	synapsin III [Source:MGI Symbol;Acc:MGI:1351334]	395.333	11	62.6667	150.667	153.667		35.9394	5.16749	7.19266e-21
Dram1	10	88322804	88379080	-		Dram1	ENSMUSG00000020057	DNA-damage regulated autophagy modulator 1 [Source:MGI Symbol;Acc:MGI:1918962]	416.333	206	424	801.667	486		2.02104	1.01509	9.53172e-07
Chpt1	10	88452745	88504073	-		Chpt1	ENSMUSG00000060002	choline phosphotransferase 1 [Source:MGI Symbol;Acc:MGI:2384841]	400.667	236	487.333	618.333	407.667		1.69774	0.763616	0.00500715
Mybpc1	10	88518279	88605152	-		Mybpc1	ENSMUSG00000020061	myosin binding protein C, slow-type [Source:MGI Symbol;Acc:MGI:1336213]	13	46.3333	29.3333	19	7		0.280576	-1.83354	0.00571566
Apaf1	10	90989311	91082770	-		Apaf1	ENSMUSG00000019979	apoptotic peptidase activating factor 1 [Source:MGI Symbol;Acc:MGI:1306796]	1901	1139.33	2041.33	2191	2064.67		1.66852	0.738569	0.000237183
Elk3	10	93247414	93311135	-		Cdk17	ENSMUSG00000020015	cyclin-dependent kinase 17 [Source:MGI Symbol;Acc:MGI:97517]	1680.67	1169.67	2478	2726.67	2612		1.43688	0.522936	0.020637
Gm15915	10	93674218	93683322	-		Ntn4	ENSMUSG00000020019	netrin 4 [Source:MGI Symbol;Acc:MGI:1888978]	1	87.6667	3	3	0.333333		0.0114068	-6.45396	0.00741729
Tmcc3	10	94311949	94590956	+		Tmcc3	ENSMUSG00000020023	transmembrane and coiled coil domains 3 [Source:MGI Symbol;Acc:MGI:2442900]	2330.67	842.667	2532.67	2039.67	3099.67		2.76582	1.46771	4.08043e-06
Cep83os	10	94671025	94688576	-		Cep83os	ENSMUSG00000097164	centrosomal protein 83, opposite strand [Source:MGI Symbol;Acc:MGI:1914973]	342.333	199.333	434.667	369	386.333		1.71739	0.780219	0.0216518
Plxnc1	10	94790866	94944835	-		Plxnc1	ENSMUSG00000074785	plexin C1 [Source:MGI Symbol;Acc:MGI:1890127]	3582.33	2250.67	11037.3	7274	9826		1.59168	0.670547	0.000396908
Socs2	10	95385362	95417180	-		Socs2	ENSMUSG00000020027	suppressor of cytokine signaling 2 [Source:MGI Symbol;Acc:MGI:1201787]	1441	235.333	1437	1555	3411.33		6.12323	2.61429	2.21356e-23
5730420D15Rik	10	95417375	95428640	+		5730420D15Rik	ENSMUSG00000097766	RIKEN cDNA 5730420D15 gene [Source:MGI Symbol;Acc:MGI:1917773]	13.3333	0	1.66667	1.33333	7.33333		#DIV/0!	#DIV/0!	0.00644191
AC153938.2	10	96310131	96362367	+		AC153938.1	ENSMUSG00000112234	No description	3.33333	33	1.66667	1.33333	4.33333		0.10101	-3.30743	0.00431371
AC153365.1	10	96495721	96523982	-		AC153365.1	ENSMUSG00000112264	No description	89	20.3333	229.667	210.333	72.6667		4.37705	2.12996	2.08655e-05
Btg1	10	96617006	96622809	+		Btg1	ENSMUSG00000036478	B cell translocation gene 1, anti- proliferative [Source:MGI Symbol;Acc:MGI:88215]	1768.33	3043	18622	16595.7	17505.3		0.581115	-0.783104	0.0216528
Lum	10	97565128	97572703	+		Lum	ENSMUSG00000036446	lumican [Source:MGI Symbol;Acc:MGI:109347]	16	0	0.666667	0.666667	0.333333		#DIV/0!	#DIV/0!	0.00262243
Dusp6	10	99263231	99267489	+		Dusp6	ENSMUSG00000019960	dual specificity phosphatase 6 [Source:MGI Symbol;Acc:MGI:1914853]	460.667	893.667	520	908.333	575		0.515479	-0.956014	0.000493667
Tmtc2	10	105187663	105574451	-		Tmtc2	ENSMUSG00000036019	transmembrane and tetratricopeptide repeat containing 2 [Source:MGI Symbol;Acc:MGI:1914057]	989.333	45.3333	526	332	543.333		21.8235	4.44781	6.33407e-31
Gm15663	10	105573953	105583874	+		Tmtc2	ENSMUSG00000036019	transmembrane and tetratricopeptide repeat containing 2 [Source:MGI Symbol;Acc:MGI:1914057]	180.333	11	49.6667	50.3333	86.6667		16.3939	4.03509	2.42882e-08
Bbs10	10	111298679	111301727	+		Bbs10	ENSMUSG00000035759	Bardet-Biedl syndrome 10 (human) [Source:MGI Symbol;Acc:MGI:1919019]	107	45	73	71.3333	107.667		2.37778	1.24961	0.00479687
AC153497.1	10	115315646	115316374	+		AC153497.1	ENSMUSG00000112301	No description	42	11	19.6667	26.3333	30.6667		3.81818	1.93289	0.00816319
Tmem19	10	115339674	115362501	-		Tmem19	ENSMUSG00000069520	transmembrane protein 19 [Source:MGI Symbol;Acc:MGI:1914476]	1179.67	566.333	1574.67	1705	2264		2.08299	1.05866	3.34036e-13
Zfc3h1	10	115384959	115432772	+		Zfc3h1	ENSMUSG00000034163	zinc finger, C3H1-type containing [Source:MGI Symbol;Acc:MGI:2446143]	2610.67	1195.33	1422.67	1476	3616		2.18405	1.12701	6.27998e-14
Tspan8	10	115816832	115849893	+		AC153364.1	ENSMUSG00000112513	No description	5.33333	65.6667	3.33333	13.3333	1		0.0812183	-3.62205	0.00254752
Lyz1	10	117287797	117292868	-		Lyz1	ENSMUSG00000069515	lysozyme 1 [Source:MGI Symbol;Acc:MGI:96902]	45.6667	118	67	126.333	123		0.387006	-1.36957	0.00138062
Mdm1	10	118141811	118168997	+		Mdm1	ENSMUSG00000020212	transformed mouse 3T3 cell double minute 1 [Source:MGI Symbol;Acc:MGI:96951]	154.667	305	190.333	156	199		0.507104	-0.979647	0.000103432
Il22	10	118204942	118210047	+		Il22	ENSMUSG00000074695	interleukin 22 [Source:MGI Symbol;Acc:MGI:1355307]	15.6667	0	1.66667	20.3333	3.66667		#DIV/0!	#DIV/0!	0.00092757
Ifng	10	118441046	118445892	+		Ifng	ENSMUSG00000055170	interferon gamma [Source:MGI Symbol;Acc:MGI:107656]	40.3333	403	74.3333	19.6667	55.6667		0.100083	-3.32074	2.24798e-10
AC153498.1	10	118441419	118444140	+		Ifng	ENSMUSG00000055170	interferon gamma [Source:MGI Symbol;Acc:MGI:107656]	15.3333	137	20.6667	3.66667	21.3333		0.111922	-3.15943	9.28087e-09
Irak3	10	120141648	120202130	-		Irak3	ENSMUSG00000020227	interleukin-1 receptor-associated kinase 3 [Source:MGI Symbol;Acc:MGI:1921164]	995.667	491.333	901	1399.33	793.667		2.02646	1.01896	0.00219156
1700006J14Rik	10	120364157	120384336	+		Hmga2	ENSMUSG00000056758	high mobility group AT-hook 2 [Source:MGI Symbol;Acc:MGI:101761]	1.66667	24.6667	4.33333	5.66667	0.666667		0.0675676	-3.88753	0.0144016
AC134528.2	10	120632672	120699203	-		AC134528.2	ENSMUSG00000112716	No description	0.333333	15	0	0.333333	0		0.0222222	-5.49185	0.00767239
Gm15910	10	120857629	120863326	+		Msrb3	ENSMUSG00000051236	methionine sulfoxide reductase B3 [Source:MGI Symbol;Acc:MGI:2443538]	50.6667	15.3333	59	29.3333	13.3333		3.30435	1.72437	0.00515645
Tbc1d30	10	121263820	121351278	-		Tbc1d30	ENSMUSG00000052302	TBC1 domain family, member 30 [Source:MGI Symbol;Acc:MGI:1921944]	516	225	222.667	170.333	216.333		2.29333	1.19745	0.0473583
Rassf3	10	121410350	121476347	-		Rassf3	ENSMUSG00000025795	Ras association (RalGDS/AF-6) domain family member 3 [Source:MGI Symbol;Acc:MGI:2179722]	2159.33	1468.33	4500.33	4355	6423		1.4706	0.556406	0.00462086
Srgap1	10	121780991	122047315	-		Srgap1	ENSMUSG00000020121	SLIT-ROBO Rho GTPase activating protein 1 [Source:MGI Symbol;Acc:MGI:2152936]	23	2.33333	5.66667	11.6667	7.66667		9.85714	3.30117	0.0296315
March9	10	127055011	127060184	-		March9	ENSMUSG00000040502	membrane-associated ring finger (C3HC4) 9 [Source:MGI Symbol;Acc:MGI:2446144]	51.6667	131.667	127.667	99	136.333		0.392405	-1.34958	0.0402094
Agap2	10	127075284	127093169	+		Agap2	ENSMUSG00000025422	ArfGAP with GTPase domain, ankyrin repeat and PH domain 2 [Source:MGI Symbol;Acc:MGI:3580016]	562	852	1476.33	1282.33	1789.33		0.659624	-0.600283	0.0176824
Gli1	10	127329882	127341974	-		Arhgap9	ENSMUSG00000040345	Rho GTPase activating protein 9 [Source:MGI Symbol;Acc:MGI:2143764]	85.6667	26.6667	20.3333	34.3333	36.6667		3.2125	1.6837	0.00194776
Lrp1	10	127538161	127621148	-		Lrp1	ENSMUSG00000040249	low density lipoprotein receptor-related protein 1 [Source:MGI Symbol;Acc:MGI:96828]	3415	1732.33	1091.67	2000.67	8033.33		1.97133	0.979169	0.00293833
Nab2	10	127660918	127668568	-		Stat6	ENSMUSG00000002147	signal transducer and activator of transcription 6 [Source:MGI Symbol;Acc:MGI:103034]	405.667	713.333	780	743	1272.33		0.568692	-0.814282	0.0202614
Gls2	10	128194457	128210004	+		Gls2	ENSMUSG00000044005	glutaminase 2 (liver, mitochondrial) [Source:MGI Symbol;Acc:MGI:2143539]	294.333	32.3333	83	280.333	52		9.10309	3.18636	1.29398e-05
Stat2	10	128270559	128292849	+		Stat2	ENSMUSG00000040033	signal transducer and activator of transcription 2 [Source:MGI Symbol;Acc:MGI:103039]	1851.33	1284.67	5997.67	3503	5232.67		1.4411	0.527171	0.0373894
Erbb3	10	128567523	128589652	-		Erbb3	ENSMUSG00000018166	erb-b2 receptor tyrosine kinase 3 [Source:MGI Symbol;Acc:MGI:95411]	337.667	219.333	227	214.333	287.667		1.53951	0.622475	0.0227057
Ikzf4	10	128630843	128645991	-		Ikzf4	ENSMUSG00000002578	IKAROS family zinc finger 4 [Source:MGI Symbol;Acc:MGI:1343139]	490.333	48	105	231.333	333.667		10.2153	3.35266	6.41569e-20
Suox	10	128669894	128674073	-		Suox	ENSMUSG00000049858	sulfite oxidase [Source:MGI Symbol;Acc:MGI:2446117]	830.667	320.333	591	800.333	899.667		2.59313	1.3747	1.00417e-13
Cdk2	10	128697939	128705031	-		Cdk2	ENSMUSG00000025358	cyclin-dependent kinase 2 [Source:MGI Symbol;Acc:MGI:104772]	1066.67	738	922.333	952.333	1797		1.44535	0.531417	0.00484485
Tmem198b	10	128800036	128804370	-		AC131081.1	ENSMUSG00000112429	No description	895.667	342	435.667	580.333	1012.67		2.61891	1.38897	0.00451625
Gdf11	10	128882295	128891718	-		Gdf11	ENSMUSG00000025352	growth differentiation factor 11 [Source:MGI Symbol;Acc:MGI:1338027]	186.667	421.333	1285	370.333	613.333		0.443038	-1.1745	0.000525541
Cd63	10	128900989	128912822	+		Cd63	ENSMUSG00000025351	CD63 antigen [Source:MGI Symbol;Acc:MGI:99529]	680.333	224.667	3170.33	5930.33	5048.67		3.02819	1.59846	1.77862e-06
Pik3ip1	11	3330401	3342971	+		Gm12592	ENSMUSG00000053263	predicted gene 12592 [Source:MGI Symbol;Acc:MGI:3649892]	405	681.333	1150	1224.67	1251.33		0.594423	-0.750439	0.000834076
Inpp5j	11	3494375	3504821	-		Pla2g3	ENSMUSG00000034579	phospholipase A2, group III [Source:MGI Symbol;Acc:MGI:2444945]	63	5.66667	238.667	49.3333	30.3333		11.1176	3.47478	4.47222e-05
Dusp18	11	3895240	3901296	+		Dusp18	ENSMUSG00000047205	dual specificity phosphatase 18 [Source:MGI Symbol;Acc:MGI:1922469]	16.6667	85.6667	13.3333	8.33333	14		0.194553	-2.36177	0.00762269
Tcn2	11	3917192	3932159	-		Tcn2	ENSMUSG00000020432	transcobalamin 2 [Source:MGI Symbol;Acc:MGI:98534]	1116	642.667	1244.67	2116.67	1426		1.73651	0.796194	0.000503653
Gatsl3	11	4218225	4222409	+		Gatsl3	ENSMUSG00000020424	GATS protein-like 3 [Source:MGI Symbol;Acc:MGI:1919212]	408	102	1515.67	665.667	392		4	2	7.39937e-10
Osm	11	4236420	4241026	+		Osm	ENSMUSG00000058755	oncostatin M [Source:MGI Symbol;Acc:MGI:104749]	544.667	199.333	1060.67	618.333	356.333		2.73244	1.45019	2.98607e-13
Lif	11	4257557	4272514	+		Lif	ENSMUSG00000034394	leukemia inhibitory factor [Source:MGI Symbol;Acc:MGI:96787]	375.667	29.6667	95.6667	104.667	106		12.6629	3.66254	3.7302e-23
Ascc2	11	4637747	4685699	+		Ascc2	ENSMUSG00000020412	activating signal cointegrator 1 complex subunit 2 [Source:MGI Symbol;Acc:MGI:1922702]	1077	756.333	1237.67	1148.33	1273.33		1.42398	0.509924	0.0232408
Nefh	11	4938754	4948064	-		Nefh	ENSMUSG00000020396	neurofilament, heavy polypeptide [Source:MGI Symbol;Acc:MGI:97309]	42.3333	128	104.667	49.6667	57		0.330729	-1.59628	9.4489e-06
Ap1b1	11	4986824	5042791	+		Ap1b1	ENSMUSG00000009090	adaptor protein complex AP-1, beta 1 subunit [Source:MGI Symbol;Acc:MGI:1096368]	1061.33	1386.67	2870	1939.33	2741.33		0.765385	-0.385743	0.0141053
Emid1	11	5106265	5152257	-		Emid1	ENSMUSG00000034164	EMI domain containing 1 [Source:MGI Symbol;Acc:MGI:2155091]	63.6667	234.333	75.3333	82.3333	295.667		0.271693	-1.87995	1.74724e-07
Kremen1	11	5191552	5261558	-		Kremen1	ENSMUSG00000020393	kringle containing transmembrane protein 1 [Source:MGI Symbol;Acc:MGI:1933988]	618	449	804.667	648.333	674.667		1.37639	0.460891	0.0231715
Znrf3	11	5276324	5444847	-		Znrf3	ENSMUSG00000041961	zinc and ring finger 3 [Source:MGI Symbol;Acc:MGI:3039616]	121.333	327.333	107	56.3333	166.667		0.370672	-1.43178	0.000404152
Xbp1	11	5520659	5525893	+		Xbp1	ENSMUSG00000020484	X-box binding protein 1 [Source:MGI Symbol;Acc:MGI:98970]	1068.33	1656	4455.33	2542	4202.33		0.645129	-0.632341	0.0314943
Ankrd36	11	5569684	5689337	+		Ankrd36	ENSMUSG00000020481	ankyrin repeat domain 36 [Source:MGI Symbol;Acc:MGI:1923639]	21.3333	1	13.6667	22.6667	5.33333		21.3333	4.41504	0.00469143
Myo1g	11	6506548	6520965	-		Myo1g	ENSMUSG00000020437	myosin IG [Source:MGI Symbol;Acc:MGI:1927091]	4323.33	2698.33	12518.3	21059.7	26168.7		1.60222	0.680076	0.00176227
Abca13	11	9191942	9684259	+		Abca13	ENSMUSG00000004668	ATP-binding cassette, sub-family A (ABC1), member 13 [Source:MGI Symbol;Acc:MGI:2388707]	0.333333	8.66667	52	135.667	0		0.0384615	-4.70044	0.0497633
Grb10	11	11930508	12038683	-		Grb10	ENSMUSG00000020176	growth factor receptor bound protein 10 [Source:MGI Symbol;Acc:MGI:103232]	6	48.6667	9	12.6667	1		0.123288	-3.0199	0.000531779
Bcl11a	11	24078056	24174123	+		Bcl11a	ENSMUSG00000000861	B cell CLL/lymphoma 11A (zinc finger protein) [Source:MGI Symbol;Acc:MGI:106190]	784	1535.67	2212.33	2009	3302		0.510527	-0.969939	0.0247156
Ccdc88a	11	29373658	29510808	+		Ccdc88a	ENSMUSG00000032740	coiled coil domain containing 88A [Source:MGI Symbol;Acc:MGI:1925177]	1709	1032.67	816.667	1049	1580.67		1.65494	0.726778	0.0116694
Eml6	11	29743048	30026033	-		Rtn4	ENSMUSG00000020458	reticulon 4 [Source:MGI Symbol;Acc:MGI:1915835]	525	154.333	264.333	220	269.667		3.40173	1.76627	2.87665e-05
Hba-a1	11	32283511	32284465	+		Hba-a1	ENSMUSG00000069919	hemoglobin alpha, adult chain 1 [Source:MGI Symbol;Acc:MGI:96015]	75.3333	185	33294	45516	1303		0.407207	-1.29616	0.0166685
Sh3pxd2b	11	32347820	32428173	+		Sh3pxd2b	ENSMUSG00000040711	SH3 and PX domains 2B [Source:MGI Symbol;Acc:MGI:2442062]	1080.67	387.333	495	974.333	681.333		2.79002	1.48027	0.0348625
Stk10	11	32533305	32624587	+		Stk10	ENSMUSG00000020272	serine/threonine kinase 10 [Source:MGI Symbol;Acc:MGI:1099439]	1579	2470.33	4315.33	3866.67	5371.33		0.639185	-0.645695	0.0113117
Lcp2	11	34046920	34092295	+		4930469K13Rik	ENSMUSG00000085684	RIKEN cDNA 4930469K13 gene [Source:MGI Symbol;Acc:MGI:1924124]	743.667	1352.33	1656.33	1757.67	1621.33		0.549914	-0.862723	3.00973e-06
Slit3	11	35121224	35708507	+		Slit3	ENSMUSG00000056427	slit homolog 3 (Drosophila) [Source:MGI Symbol;Acc:MGI:1315202]	236.667	15	738.333	640.667	15		15.7778	3.97982	2.70838e-11
Il12b	11	44400063	44414033	+		Il12b	ENSMUSG00000004296	interleukin 12b [Source:MGI Symbol;Acc:MGI:96540]	903.333	137.333	2204.33	1164.67	993		6.57767	2.71758	2.17898e-22
Itk	11	46325150	46389515	-		Itk	ENSMUSG00000020395	IL2 inducible T cell kinase [Source:MGI Symbol;Acc:MGI:96621]	729	1423	631.333	420.667	943		0.512298	-0.964945	8.43716e-05
Med7	11	46436925	46442721	+		Med7	ENSMUSG00000020397	mediator complex subunit 7 [Source:MGI Symbol;Acc:MGI:1913463]	312.667	513	713.333	474	619		0.609487	-0.714333	0.00215811
2310031A07Rik	11	46440362	46447248	-		Med7	ENSMUSG00000020397	mediator complex subunit 7 [Source:MGI Symbol;Acc:MGI:1913463]	179.333	379.667	459.667	279	337.333		0.472344	-1.08209	2.64105e-05
Timd2	11	46668960	46707061	-		Timd2	ENSMUSG00000040413	T cell immunoglobulin and mucin domain containing 2 [Source:MGI Symbol;Acc:MGI:2159681]	99.6667	30.3333	91.3333	48.3333	72.3333		3.28571	1.71621	0.0096888
Gm5431	11	48887422	48902214	-		Gm5431	ENSMUSG00000058163	predicted gene 5431 [Source:MGI Symbol;Acc:MGI:3645205]	207.667	87	324.667	193	206.667		2.38697	1.25518	0.0105568
Flt4	11	49609263	49652739	+		Flt4	ENSMUSG00000020357	FMS-like tyrosine kinase 4 [Source:MGI Symbol;Acc:MGI:95561]	32	6.33333	24	63.3333	19		5.05263	2.33703	0.00137518
Grm6	11	50850685	50866208	+		Grm6	ENSMUSG00000000617	glutamate receptor, metabotropic 6 [Source:MGI Symbol;Acc:MGI:1351343]	381	51.3333	181.667	183.667	173.333		7.42208	2.89182	7.09346e-16
Gm12660	11	50851332	50852582	-		Grm6	ENSMUSG00000000617	glutamate receptor, metabotropic 6 [Source:MGI Symbol;Acc:MGI:1351343]	25.6667	3	20.6667	22	20.3333		8.55556	3.09686	0.00138866
Col23a1	11	51289920	51583918	+		Col23a1	ENSMUSG00000063564	collagen, type XXIII, alpha 1 [Source:MGI Symbol;Acc:MGI:2653243]	34	125	116	92	80.3333		0.272	-1.87832	9.99101e-05
Sowaha	11	53476573	53480274	-		Sowaha	ENSMUSG00000044352	sosondowah ankyrin repeat domain family member A [Source:MGI Symbol;Acc:MGI:2687280]	3.33333	45.6667	5.66667	11	0		0.0729927	-3.7761	0.0209407
Kif3a	11	53567379	53601967	+		Kif3a	ENSMUSG00000018395	kinesin family member 3A [Source:MGI Symbol;Acc:MGI:107689]	283.333	144.333	172.333	187	223.667		1.96305	0.973096	0.000871588
Rad50	11	53649519	53707319	-		Rad50	ENSMUSG00000020380	RAD50 double strand break repair protein [Source:MGI Symbol;Acc:MGI:109292]	1077	710.667	905.333	846	1453.33		1.51548	0.599773	0.00431729
Gm12216	11	53783418	53859256	-		Gm12216	ENSMUSG00000081769	predicted gene 12216 [Source:MGI Symbol;Acc:MGI:3650088]	179.333	64.3333	67.3333	172.667	184.667		2.78756	1.47901	0.0059513
Slc22a4	11	53983123	54028090	-		Slc22a4	ENSMUSG00000020334	solute carrier family 22 (organic cation transporter), member 4 [Source:MGI Symbol;Acc:MGI:1353479]	197	57.6667	77	99	80		3.41618	1.77239	0.00279126
Pdlim4	11	54054928	54069014	-		Pdlim4	ENSMUSG00000020388	PDZ and LIM domain 4 [Source:MGI Symbol;Acc:MGI:1353470]	360.333	91	1898	1151	712.667		3.95971	1.98539	2.68023e-07
P4ha2	11	54100095	54131665	+		P4ha2	ENSMUSG00000018906	procollagen-proline, 2-oxoglutarate 4- dioxygenase (proline 4-hydroxylase), alpha II polypeptide [Source:MGI Symbol;Acc:MGI:894286]	34.6667	5.66667	322.333	41	23.6667		6.11765	2.61298	0.0124071
Csf2	11	54247271	54249667	-		Csf2	ENSMUSG00000018916	colony stimulating factor 2 (granulocyte- macrophage) [Source:MGI Symbol;Acc:MGI:1339752]	44	10.6667	16.6667	49.3333	20.6667		4.125	2.04439	0.0379425
Ccdc69	11	55049731	55078131	-		Ccdc69	ENSMUSG00000049588	coiled-coil domain containing 69 [Source:MGI Symbol;Acc:MGI:1196234]	180.667	370.667	416.667	436.333	417.333		0.48741	-1.03679	0.0216381
Gm2a	11	55098115	55113029	+		Gm2a	ENSMUSG00000000594	GM2 ganglioside activator protein [Source:MGI Symbol;Acc:MGI:95762]	1195	2227.67	5793	5931.33	4963		0.536436	-0.898523	0.00317228
Slc36a3os	11	55137044	55140193	+		Slc36a3	ENSMUSG00000049491	solute carrier family 36 (proton/amino acid symporter), member 3 [Source:MGI Symbol;Acc:MGI:2665001]	21	82.3333	44.6667	48	37		0.255061	-1.97109	1.05965e-05
Hand1	11	57828705	57832818	-		Hand1	ENSMUSG00000037335	heart and neural crest derivatives expressed transcript 1 [Source:MGI Symbol;Acc:MGI:103577]	400.333	0	109.667	113	56.3333		#DIV/0!	#DIV/0!	3.98939e-17
Gm12258	11	58847158	58861956	+		Gm12258	ENSMUSG00000072915	predicted gene 12258 [Source:MGI Symbol;Acc:MGI:3651534]	219.333	91	71.6667	86.3333	245.333		2.41026	1.26919	0.000197265
Btnl10	11	58917908	58927158	+		Btnl10	ENSMUSG00000020490	butyrophilin-like 10 [Source:MGI Symbol;Acc:MGI:2182073]	4.66667	238.667	24.6667	7.33333	0		0.0195531	-5.67646	0.00441521
Rasd1	11	59963181	59964944	-		Rasd1	ENSMUSG00000049892	RAS, dexamethasone-induced 1 [Source:MGI Symbol;Acc:MGI:1270848]	160	77.6667	118	38	41		2.06009	1.0427	0.0250611
Specc1	11	61956763	62223013	+		Specc1	ENSMUSG00000042331	sperm antigen with calponin homology and coiled-coil domains 1 [Source:MGI Symbol;Acc:MGI:2442356]	3100	871.667	2856.67	3320.67	2938.33		3.55641	1.83042	3.00956e-10
Lrrc75a	11	62604884	62648523	-		Lrrc75a	ENSMUSG00000046417	leucine rich repeat containing 75A [Source:MGI Symbol;Acc:MGI:2682293]	58	187.667	60.6667	72.6667	135		0.309059	-1.69405	5.74769e-06
Gm27194	11	62749852	62752787	+		Gm27194	ENSMUSG00000098292	predicted gene 27194 [Source:MGI Symbol;Acc:MGI:5521037]	4.33333	36.3333	4	3	6.33333		0.119266	-3.06774	7.26068e-05
Hs3st3b1	11	63885792	63922290	-		Hs3st3b1	ENSMUSG00000070407	heparan sulfate (glucosamine) 3-O- sulfotransferase 3B1 [Source:MGI Symbol;Acc:MGI:1333853]	129.333	473	85.3333	104.667	263		0.273432	-1.87075	6.97574e-06
Tmem220	11	67025154	67035312	+		Tmem220	ENSMUSG00000050270	transmembrane protein 220 [Source:MGI Symbol;Acc:MGI:2443691]	85.6667	36.3333	73.6667	60.3333	44		2.3578	1.23744	0.00170181
Pik3r6	11	68503019	68552698	+		Pik3r6	ENSMUSG00000046207	phosphoinositide-3-kinase regulatory subunit 5 [Source:MGI Symbol;Acc:MGI:2144613]	610.667	203.333	395.667	689	325.333		3.00328	1.58654	0.00304618
Per1	11	69095217	69109960	+		Per1	ENSMUSG00000020893	period circadian clock 1 [Source:MGI Symbol;Acc:MGI:1098283]	650	1374	849.667	699.667	1240		0.473071	-1.07987	2.81455e-08
Dnah2	11	69420809	69549110	-		Dnah2	ENSMUSG00000005237	dynein, axonemal, heavy chain 2 [Source:MGI Symbol;Acc:MGI:107731]	1237	172.667	257	1055	2111		7.16409	2.84078	1.08474e-09
Dnah2os	11	69448548	69453676	+		Dnah2	ENSMUSG00000005237	dynein, axonemal, heavy chain 2 [Source:MGI Symbol;Acc:MGI:107731]	9.66667	0.333333	1	0.666667	4		29	4.85798	0.0324034
Atp1b2	11	69599736	69605942	-		Atp1b2	ENSMUSG00000041329	ATPase, Na+/K+ transporting, beta 2 polypeptide [Source:MGI Symbol;Acc:MGI:88109]	1.33333	81.6667	6.66667	3.33333	2.66667		0.0163265	-5.93664	3.86091e-06
Chrnb1	11	69784036	69795943	-		Chrnb1	ENSMUSG00000041189	cholinergic receptor, nicotinic, beta polypeptide 1 (muscle) [Source:MGI Symbol;Acc:MGI:87890]	330.667	130.333	282	301.667	227.333		2.53708	1.34317	1.06091e-07
Fgf11	11	69796068	69801857	-		Fgf11	ENSMUSG00000042826	fibroblast growth factor 11 [Source:MGI Symbol;Acc:MGI:109167]	160	20.6667	168	183.333	23.6667		7.74194	2.95269	9.89028e-11
Nlgn2	11	69823122	69837784	-		Nlgn2	ENSMUSG00000051790	neuroligin 2 [Source:MGI Symbol;Acc:MGI:2681835]	139.667	52.3333	135.333	81.3333	72.6667		2.66879	1.41619	0.000906545
Slc2a4	11	69942539	69948188	-		Slc2a4	ENSMUSG00000018566	solute carrier family 2 (facilitated glucose transporter), member 4 [Source:MGI Symbol;Acc:MGI:95758]	2.33333	26.6667	0	1.66667	4.66667		0.0875	-3.51457	0.033913
Mgl2	11	70130329	70137550	+		Mgl2	ENSMUSG00000040950	macrophage galactose N-acetyl-galactosamine specific lectin 2 [Source:MGI Symbol;Acc:MGI:2385729]	16.6667	43	10.6667	13	14.6667		0.387597	-1.36737	0.0315218
Clec10a	11	70156197	70170834	+		Clec10a	ENSMUSG00000000318	C-type lectin domain family 10, member A [Source:MGI Symbol;Acc:MGI:96975]	100	271.333	205.667	170.667	382.667		0.36855	-1.44007	0.00121991
Cxcl16	11	70453983	70459984	-		Cxcl16	ENSMUSG00000018920	chemokine (C-X-C motif) ligand 16 [Source:MGI Symbol;Acc:MGI:1932682]	2087.67	847.667	6614.33	7163.67	8827		2.46284	1.30032	0.00110205
Zmynd15	11	70459433	70466202	+		Cxcl16	ENSMUSG00000018920	chemokine (C-X-C motif) ligand 16 [Source:MGI Symbol;Acc:MGI:1932682]	1643.33	273	2163	2627.67	4110.67		6.01954	2.58965	9.01953e-14
Tm4sf5	11	70505244	70511178	+		Tm4sf5	ENSMUSG00000018919	transmembrane 4 superfamily member 5 [Source:MGI Symbol;Acc:MGI:1922854]	204	34.3333	73.3333	165	471.667		5.94175	2.57089	2.19687e-12
Chrne	11	70614883	70619216	-		Chrne	ENSMUSG00000014609	cholinergic receptor, nicotinic, epsilon polypeptide [Source:MGI Symbol;Acc:MGI:87894]	5	42.3333	1	2	6.33333		0.11811	-3.08179	8.82408e-06
4930544D05Rik	11	70615848	70616890	+		Chrne	ENSMUSG00000014609	cholinergic receptor, nicotinic, epsilon polypeptide [Source:MGI Symbol;Acc:MGI:87894]	0	10.3333	0.666667	1.66667	1.66667		0	#NUM!	0.00754868
Camta2	11	70669463	70688105	-		Camta2	ENSMUSG00000040712	calmodulin binding transcription activator 2 [Source:MGI Symbol;Acc:MGI:2135957]	1438.67	903	1613.67	2043.33	2561		1.59321	0.671934	0.000590304
Inca1	11	70688361	70700155	-		Inca1	ENSMUSG00000057054	inhibitor of CDK, cyclin A1 interacting protein 1 [Source:MGI Symbol;Acc:MGI:2144284]	31.6667	8.33333	23.3333	26	17.6667		3.8	1.926	0.0129595
Kif1c	11	70700548	70731964	+		Kif1c	ENSMUSG00000020821	kinesin family member 1C [Source:MGI Symbol;Acc:MGI:1098260]	1716.67	1164	2281.33	2906.67	3391		1.4748	0.560519	0.000685633
Scimp	11	70790932	70812586	-		Scimp	ENSMUSG00000057135	SLP adaptor and CSK interacting membrane protein [Source:MGI Symbol;Acc:MGI:3610314]	99.3333	337.667	284.333	238	357.333		0.294176	-1.76525	1.11316e-11
6330403K07Rik	11	71031941	71033513	-		6330403K07Rik	ENSMUSG00000018451	RIKEN cDNA 6330403K07 gene [Source:MGI Symbol;Acc:MGI:1918001]	6.33333	30	10.3333	6.33333	6.33333		0.211111	-2.24393	0.0232653
Ube2g1	11	72607283	72686481	+		Ube2g1	ENSMUSG00000020794	ubiquitin-conjugating enzyme E2G 1 [Source:MGI Symbol;Acc:MGI:1914378]	619	896.667	1354.33	985.333	1209.33		0.690335	-0.534632	0.0288576
Camkk1	11	73019008	73042073	+		Camkk1	ENSMUSG00000020785	calcium/calmodulin-dependent protein kinase kinase 1, alpha [Source:MGI Symbol;Acc:MGI:1891766]	69.3333	221	44.3333	43	60.3333		0.313726	-1.67243	0.00857774
Itgae	11	73090583	73147446	+		Itgae	ENSMUSG00000005947	integrin alpha E, epithelial-associated [Source:MGI Symbol;Acc:MGI:1298377]	67.3333	219	41.6667	84.6667	134.333		0.307458	-1.70154	0.00551691
P2rx5	11	73160421	73172685	+		P2rx5	ENSMUSG00000005950	purinergic receptor P2X, ligand-gated ion channel, 5 [Source:MGI Symbol;Acc:MGI:2137026]	277.667	62.3333	78.3333	120.667	370		4.45455	2.15528	0.000422459
Rap1gap2	11	74383356	74610915	-		Rap1gap2	ENSMUSG00000038807	RAP1 GTPase activating protein 2 [Source:MGI Symbol;Acc:MGI:3028623]	556.667	965.333	745.333	939.667	434.333		0.576658	-0.794213	0.000181368
Mettl16	11	74770830	74828525	+		Mettl16	ENSMUSG00000010554	methyltransferase like 16 [Source:MGI Symbol;Acc:MGI:1914743]	593.667	804	788.333	594.333	850.333		0.738391	-0.437542	0.0357696
Rtn4rl1	11	75193783	75267769	+		Rtn4rl1	ENSMUSG00000045287	reticulon 4 receptor-like 1 [Source:MGI Symbol;Acc:MGI:2661375]	63.6667	232	124.667	114.667	149		0.274425	-1.86551	1.46826e-09
Serpinf2	11	75431732	75439591	-		Serpinf2	ENSMUSG00000038224	serine (or cysteine) peptidase inhibitor, clade F, member 2 [Source:MGI Symbol;Acc:MGI:107173]	9.66667	49.6667	3.33333	3.33333	8		0.194631	-2.36119	0.0436324
Slc43a2	11	75531694	75577575	+		Gm45606	ENSMUSG00000109715	predicted gene 45606 [Source:MGI Symbol;Acc:MGI:5791442]	2615.33	1611	2748.33	3651.33	4993.33		1.62342	0.699038	6.01727e-05
Ankrd13b	11	77470485	77489678	-		Ankrd13b	ENSMUSG00000037907	ankyrin repeat domain 13b [Source:MGI Symbol;Acc:MGI:2144501]	30.3333	98	51.3333	39.6667	82		0.309524	-1.69188	0.00360728
Traf4	11	78158499	78165589	-		Traf4	ENSMUSG00000017386	TNF receptor associated factor 4 [Source:MGI Symbol;Acc:MGI:1202880]	279.333	459.333	733	401	564.667		0.608128	-0.717554	0.000444724
Nek8	11	78166106	78176675	-		Nek8	ENSMUSG00000017405	NIMA (never in mitosis gene a)-related expressed kinase 8 [Source:MGI Symbol;Acc:MGI:1890646]	381	208	438.333	428.333	394.667		1.83173	0.873207	0.00174239
Unc119	11	78343482	78349164	+		Unc119	ENSMUSG00000002058	unc-119 lipid binding chaperone [Source:MGI Symbol;Acc:MGI:1328357]	246.333	513.667	1349.67	1132	659.667		0.479559	-1.06022	0.000237661
Ksr1	11	79013440	79146407	-		Ksr1	ENSMUSG00000018334	kinase suppressor of ras 1 [Source:MGI Symbol;Acc:MGI:105051]	908.333	497.333	1013.33	819.667	717.667		1.82641	0.869009	0.011606
Adap2	11	80154105	80178958	+		Adap2	ENSMUSG00000020709	ArfGAP with dual PH domains 2 [Source:MGI Symbol;Acc:MGI:2663075]	540.667	306.333	290.667	236	773.667		1.76496	0.819637	9.64029e-06
Adap2os	11	80158861	80177629	-		Adap2	ENSMUSG00000020709	ArfGAP with dual PH domains 2 [Source:MGI Symbol;Acc:MGI:2663075]	103.667	51.6667	43.3333	38.6667	121.333		2.00645	1.00465	0.00742129
Myo1d	11	80482126	80780025	-		Myo1d	ENSMUSG00000035441	myosin ID [Source:MGI Symbol;Acc:MGI:107728]	217.667	63.6667	501.333	750.667	66.3333		3.41885	1.77351	0.0286672
Nle1	11	82900768	82908411	-		Fndc8	ENSMUSG00000018844	fibronectin type III domain containing 8 [Source:MGI Symbol;Acc:MGI:1926169]	200	320.333	357.333	273.667	398.333		0.62435	-0.679574	0.0100384
Slfn4	11	83175186	83190216	+		Slfn4	ENSMUSG00000000204	schlafen 4 [Source:MGI Symbol;Acc:MGI:1329010]	57.6667	279.333	518	6309.67	43.3333		0.206444	-2.27618	2.00121e-09
1700020L24Rik	11	83437677	83441233	+		1700020L24Rik	ENSMUSG00000035085	RIKEN cDNA 1700020L24 gene [Source:MGI Symbol;Acc:MGI:1913580]	10	30.6667	16	34.6667	9.66667		0.326087	-1.61667	0.0213038
Mmp28	11	83440768	83463071	-		1700020L24Rik	ENSMUSG00000035085	RIKEN cDNA 1700020L24 gene [Source:MGI Symbol;Acc:MGI:1913580]	11.3333	46	15	24.3333	9.33333		0.246377	-2.02106	0.000862759
Ccl9	11	83572919	83578636	-		Ccl9	ENSMUSG00000019122	chemokine (C-C motif) ligand 9 [Source:MGI Symbol;Acc:MGI:104533]	1038.67	518	1018.67	2648.67	1243.33		2.00515	1.00371	8.34724e-05
Ccl3	11	83647844	83649355	-		Ccl3	ENSMUSG00000000982	chemokine (C-C motif) ligand 3 [Source:MGI Symbol;Acc:MGI:98260]	158.333	501.333	339.667	1322.67	519.333		0.315824	-1.66281	4.12119e-10
Ccl4	11	83662584	83664683	+		Ccl4	ENSMUSG00000018930	chemokine (C-C motif) ligand 4 [Source:MGI Symbol;Acc:MGI:98261]	96	420.667	545	773.667	601.333		0.228209	-2.13157	2.57352e-12
Wfdc21	11	83746940	83752642	+		Wfdc21	ENSMUSG00000051748	WAP four-disulfide core domain 21 [Source:MGI Symbol;Acc:MGI:1913357]	11.6667	37.3333	51.3333	1330	55.3333		0.3125	-1.67807	0.00765215
Gm12576	11	83817682	83849493	-		Gm12576	ENSMUSG00000085235	predicted gene 12576 [Source:MGI Symbol;Acc:MGI:3650616]	15	0	1	1.33333	2.66667		#DIV/0!	#DIV/0!	0.000565404
Hnf1b	11	83850063	83905819	+		Hnf1b	ENSMUSG00000020679	HNF1 homeobox B [Source:MGI Symbol;Acc:MGI:98505]	316.667	7	31	58.6667	104.333		45.2381	5.49947	3.50824e-31
Rps6kb1	11	86498871	86544805	-		Rnft1	ENSMUSG00000020521	ring finger protein, transmembrane 1 [Source:MGI Symbol;Acc:MGI:1924142]	761	1134.67	1002.33	824.333	1200		0.670682	-0.5763	0.0164194
Tubd1	11	86544991	86567360	+		Tubd1	ENSMUSG00000020513	tubulin, delta 1 [Source:MGI Symbol;Acc:MGI:1891826]	96	173	163.667	135.333	120.667		0.554913	-0.849666	0.0315546
Gdpd1	11	87033867	87074062	-		Gdpd1	ENSMUSG00000061666	glycerophosphodiester phosphodiesterase domain containing 1 [Source:MGI Symbol;Acc:MGI:1913819]	345.333	169.667	95	201.667	283.667		2.03536	1.02529	0.0310754
Tex14	11	87405065	87555823	+		Tex14	ENSMUSG00000010342	testis expressed gene 14 [Source:MGI Symbol;Acc:MGI:1933227]	1429.67	54.6667	73.3333	202	70		26.1524	4.70887	1.06443e-26
Mpo	11	87793581	87804413	+		Mpo	ENSMUSG00000009350	myeloperoxidase [Source:MGI Symbol;Acc:MGI:97137]	9	34.6667	1.33333	182.667	1.66667		0.259615	-1.94555	0.0279658
Dynll2	11	87979525	87987533	-		Dynll2	ENSMUSG00000020483	dynein light chain LC8-type 2 [Source:MGI Symbol;Acc:MGI:1915347]	998	694.667	2707	2212.67	2449		1.43666	0.522719	0.0378589
Pctp	11	89982665	90002894	-		Pctp	ENSMUSG00000020553	phosphatidylcholine transfer protein [Source:MGI Symbol;Acc:MGI:107375]	452.333	248.333	584.333	565.667	453		1.82148	0.865108	0.0101258
Mmd	11	90249456	90278589	+		Gm45716	ENSMUSG00000110344	predicted gene 45716 [Source:MGI Symbol;Acc:MGI:5804831]	1202.33	718.333	1404.67	1814.67	2449		1.67378	0.743112	0.0327882
Tom1l1	11	90643465	90688366	-		Cox11	ENSMUSG00000020544	cytochrome c oxidase assembly protein 11 [Source:MGI Symbol;Acc:MGI:1917052]	147	257	149.333	153.333	199		0.571984	-0.805952	0.0193005
Utp18	11	93859243	93885766	-		Utp18	ENSMUSG00000054079	UTP18 small subunit processome component [Source:MGI Symbol;Acc:MGI:1923402]	467.667	685.333	1097.33	882.667	1077		0.682393	-0.551325	0.033134
Tob1	11	94211454	94215495	+		Tob1	ENSMUSG00000037573	transducer of ErbB-2.1 [Source:MGI Symbol;Acc:MGI:1349721]	227.667	502.333	421.333	392	470.667		0.453218	-1.14172	0.000170601
Wfikkn2	11	94235956	94246005	-		Wfikkn2	ENSMUSG00000044177	WAP, follistatin/kazal, immunoglobulin, kunitz and netrin domain containing 2 [Source:MGI Symbol;Acc:MGI:2669209]	3	27.3333	5.66667	9	21.3333		0.109756	-3.18763	0.0245722
Fam117a	11	95337018	95381872	+		Gm11521	ENSMUSG00000085509	predicted gene 11521 [Source:MGI Symbol;Acc:MGI:3651772]	384.667	726.333	1541.33	1065	1228.67		0.529601	-0.917023	0.000143874
Slc35b1	11	95384692	95391776	+		Slc35b1	ENSMUSG00000020873	solute carrier family 35, member B1 [Source:MGI Symbol;Acc:MGI:1343133]	369.333	584	709.667	620	954		0.63242	-0.661045	0.0108034
Ngfr	11	95568818	95587735	-		Ngfr	ENSMUSG00000000120	nerve growth factor receptor (TNFR superfamily, member 16) [Source:MGI Symbol;Acc:MGI:97323]	3	110.333	17.6667	22.6667	90.6667		0.0271903	-5.20076	2.88868e-09
B4galnt2	11	95865943	95914891	-		B4galnt2	ENSMUSG00000013418	beta-1,4-N-acetyl-galactosaminyl transferase 2 [Source:MGI Symbol;Acc:MGI:1342058]	64.6667	22.6667	22.6667	26.3333	42		2.85294	1.51245	0.00468521
Skap1	11	96464593	96759130	+		Skap1	ENSMUSG00000057058	src family associated phosphoprotein 1 [Source:MGI Symbol;Acc:MGI:1925723]	159	804.333	649.667	458.333	487		0.197679	-2.33877	1.86665e-12
2010300F17Rik	11	96712982	96747436	-		Skap1	ENSMUSG00000057058	src family associated phosphoprotein 1 [Source:MGI Symbol;Acc:MGI:1925723]	23.6667	98.3333	85.3333	69	60		0.240678	-2.05482	1.83305e-05
Pnpo	11	96937825	96943986	-		D030028A08Rik	ENSMUSG00000078700	RIKEN cDNA D030028A08 gene [Source:MGI Symbol;Acc:MGI:2441931]	416.333	601.667	753.333	595	586.333		0.691967	-0.531225	0.00729273
Tbx21	11	97098071	97115331	-		Tbx21	ENSMUSG00000001444	T-box 21 [Source:MGI Symbol;Acc:MGI:1888984]	89.6667	602.667	481	470	146		0.148783	-2.74872	1.92023e-11
Mrpl45	11	97315716	97329920	+		Mrpl45	ENSMUSG00000018882	mitochondrial ribosomal protein L45 [Source:MGI Symbol;Acc:MGI:1914286]	726.333	441.667	1754.33	1663.33	1117.33		1.64453	0.717674	0.00794623
Gm11613	11	97644184	97660367	-		Gm11613	ENSMUSG00000085586	predicted gene 11613 [Source:MGI Symbol;Acc:MGI:3651819]	196	85.3333	134.667	155.333	214.667		2.29687	1.19967	0.000367107
Mllt6	11	97663414	97685463	+		Mllt6	ENSMUSG00000038437	myeloid/lymphoid or mixed-lineage leukemia; translocated to, 6 [Source:MGI Symbol;Acc:MGI:1935145]	3324.33	2413.33	5193.33	7332	11192		1.37749	0.462038	0.00741729
B230217C12Rik	11	97840780	97844099	+		B230217C12Rik	ENSMUSG00000050538	RIKEN cDNA B230217C12 gene [Source:MGI Symbol;Acc:MGI:1915377]	10.3333	56.3333	13	16	19		0.183432	-2.44668	0.000401195
Cacnb1	11	98001508	98023034	-		Cacnb1	ENSMUSG00000020882	calcium channel, voltage-dependent, beta 1 subunit [Source:MGI Symbol;Acc:MGI:102522]	289.667	129.667	284.667	434	386		2.23393	1.15959	0.00100341
Stac2	11	98036623	98053462	-		Stac2	ENSMUSG00000017400	SH3 and cysteine rich domain 2 [Source:MGI Symbol;Acc:MGI:2144518]	127.667	304.667	319.667	313	464		0.419037	-1.25485	0.00546186
Fbxl20	11	98082556	98150403	-		Fbxl20	ENSMUSG00000020883	F-box and leucine-rich repeat protein 20 [Source:MGI Symbol;Acc:MGI:1919444]	1686	1321.33	1611.67	1344.67	2387.67		1.27598	0.35161	0.0451729
Ormdl3	11	98581256	98587368	-		Ormdl3	ENSMUSG00000038150	ORM1-like 3 (S. cerevisiae) [Source:MGI Symbol;Acc:MGI:1913862]	323.667	505.667	816.333	661.667	855.333		0.640079	-0.643678	0.000489471
Ccr7	11	99144196	99155077	-		Ccr7	ENSMUSG00000037944	chemokine (C-C motif) receptor 7 [Source:MGI Symbol;Acc:MGI:103011]	3310.67	1796	33560.3	35238.3	37067		1.84336	0.882334	1.97473e-05
Krt222	11	99232761	99244085	-		Krt222	ENSMUSG00000035849	keratin 222 [Source:MGI Symbol;Acc:MGI:2442728]	368	118.667	500.333	518	159.667		3.10112	1.63279	6.98491e-11
Eif1	11	100319885	100322096	+		Eif1	ENSMUSG00000035530	eukaryotic translation initiation factor 1 [Source:MGI Symbol;Acc:MGI:105125]	664.667	1107.33	7239.33	7411	6964.33		0.600241	-0.736387	0.0323951
P3h4	11	100408456	100414836	-		P3h4	ENSMUSG00000006931	prolyl 3-hydroxylase family member 4 (non- enzymatic) [Source:MGI Symbol;Acc:MGI:1913430]	3	16.3333	1.33333	0	6.33333		0.183673	-2.44478	0.0480987
Dhx58	11	100694884	100704271	-		Dhx58os	ENSMUSG00000085604	DEAH (Asp-Glu-Ala-His) box polypeptide 58, opposite strand [Source:MGI Symbol;Acc:MGI:3705104]	863.667	457.667	3742.67	2793.67	1588.67		1.88711	0.916177	0.0449194
Stat5a	11	100859351	100885169	+		Stat5a	ENSMUSG00000004043	signal transducer and activator of transcription 5A [Source:MGI Symbol;Acc:MGI:103036]	1390	774.667	1386.33	1960.67	2163.33		1.79432	0.843437	0.00847635
Cavin1	11	100956733	100970887	-		Cavin1	ENSMUSG00000004044	caveolae associated 1 [Source:MGI Symbol;Acc:MGI:1277968]	234	33.3333	39	83.6667	118.667		7.02	2.81147	0.000122632
Naglu	11	101070012	101077672	+		Naglu	ENSMUSG00000001751	alpha-N-acetylglucosaminidase (Sanfilippo disease IIIB) [Source:MGI Symbol;Acc:MGI:1351641]	563	317.333	973.667	1036.67	1117		1.77416	0.827136	0.0198325
Tmem106a	11	101582242	101591788	+		Tmem106a	ENSMUSG00000034947	transmembrane protein 106A [Source:MGI Symbol;Acc:MGI:1922056]	1055.67	426	1131.33	1502.67	2187		2.47809	1.30923	2.67023e-09
Arl4d	11	101665541	101667832	+		Arl4d	ENSMUSG00000034936	ADP-ribosylation factor-like 4D [Source:MGI Symbol;Acc:MGI:1933155]	73.3333	609	157.333	61.3333	136		0.120416	-3.0539	1.6594e-07
Cd300lg	11	102041509	102055620	+		Cd300lg	ENSMUSG00000017309	CD300 molecule like family member G [Source:MGI Symbol;Acc:MGI:1289168]	6	108	1.33333	4.33333	6		0.0555556	-4.16993	3.6178e-15
Mpp2	11	102057015	102088515	-		Mpp2	ENSMUSG00000017314	membrane protein, palmitoylated 2 (MAGUK p55 subfamily member 2) [Source:MGI Symbol;Acc:MGI:1858257]	246.667	39.3333	49.6667	110	61.6667		6.27119	2.64874	0.000237183
Adam11	11	102761439	102780262	+		Adam11	ENSMUSG00000020926	a disintegrin and metallopeptidase domain 11 [Source:MGI Symbol;Acc:MGI:1098667]	1767	453.333	342.667	1347.33	4099		3.89779	1.96266	7.74546e-09
Gfap	11	102887336	102900912	-		Gm26668	ENSMUSG00000097410	predicted gene, 26668 [Source:MGI Symbol;Acc:MGI:5477162]	1.66667	26.6667	0	0	1.33333		0.0625	-4	0.0389615
Plcd3	11	103070304	103101658	-		Gm26668	ENSMUSG00000097410	predicted gene, 26668 [Source:MGI Symbol;Acc:MGI:5477162]	259.333	79.6667	13	20.6667	152.333		3.25523	1.70276	0.00411988
Map3k14	11	103219762	103267472	-		Map3k14	ENSMUSG00000020941	mitogen-activated protein kinase kinase kinase 14 [Source:MGI Symbol;Acc:MGI:1858204]	2580.33	1456.67	4270.33	4789.67	7088		1.7714	0.824887	0.0369039
Arhgap27os3	11	103344753	103350124	+		Arhgap27	ENSMUSG00000034255	Rho GTPase activating protein 27 [Source:MGI Symbol;Acc:MGI:1916903]	453.333	236.667	948.667	917.333	794.667		1.91549	0.937716	1.33924e-06
[truncated: 993 more rows]

## Sheet: Table S2 IRF4KO regulated genes
Table 2: Genes altered in IRF4-/- cells by DESeq2 using FDR<0.05
Probe	Chromosome	Start	End	Probe Strand	Feature	ID	Description	CPT	UN	DOX	IRF4KO	WT		FC [IRF4KO/WT]	log2FC [IRF4KO/WT]	FDR
Col19a1	1	24261890	24587472	-	Col19a1-202	ENSMUSP00000110899	collagen, type XIX, alpha 1 [Source:MGI Symbol;Acc:MGI:1095415]	17	17.3333	0	0	6.66667		0	#NUM!	0.0369967
Gm38386	2	6479690	6483110	+	null			15	6.66667	0	0	8.33333		0	#NUM!	0.0106808
Rapgef4os3	2	72244965	72248975	-	Rapgef4-202	ENSMUSP00000088336	Rap guanine nucleotide exchange factor (GEF) 4 [Source:MGI Symbol;Acc:MGI:1917723]	1.66667	3.66667	0	0	26		0	#NUM!	0.000400743
Lrrn4	2	132868305	132880891	-	Lrrn4-201	ENSMUSP00000057005	leucine rich repeat neuronal 4 [Source:MGI Symbol;Acc:MGI:2445154]	1	1	0	0	7.66667		0	#NUM!	0.0250078
Gm42697	3	129728845	129740188	+	Egf-201	ENSMUSP00000029653	epidermal growth factor [Source:MGI Symbol;Acc:MGI:95290]	29.6667	0	2.66667	0	8.33333		0	#NUM!	0.0190919
Grik3	4	125490700	125714173	+	Grik3-201	ENSMUSP00000030676	glutamate receptor, ionotropic, kainate 3 [Source:MGI Symbol;Acc:MGI:95816]	4	0	0	0	11.6667		0	#NUM!	0.00314228
D430018E03Rik	5	142874077	142878373	-	Fbxl18-202	ENSMUSP00000106394	F-box and leucine-rich repeat protein 18 [Source:MGI Symbol;Acc:MGI:2444450]	15.3333	7.66667	5.66667	0	15		0	#NUM!	0.00421487
4930511E03Rik	6	94943834	94951545	+	null			1.33333	3	0	0	6.33333		0	#NUM!	0.0358038
Gm37292	7	31208357	31209114	+	null			6.33333	0.666667	0.333333	0	6		0	#NUM!	0.0426379
Fut1	7	45617289	45621059	+	Fut1-203	ENSMUSP00000147602	fucosyltransferase 1 [Source:MGI Symbol;Acc:MGI:109375]	5	26.3333	0	0	9.33333		0	#NUM!	0.00681089
Sec1	7	45677686	45694402	-	Sec1-201	ENSMUSP00000045229	secretory blood group 1 [Source:MGI Symbol;Acc:MGI:1928893]	6.33333	13.3333	1	0	12.6667		0	#NUM!	0.00166375
A530021J07Rik	7	83061783	83179429	+	null			0.333333	39.3333	0.333333	0	12		0	#NUM!	0.00215869
Chp2	7	122219496	122222824	+	Chp2-201	ENSMUSP00000033152	calcineurin-like EF hand protein 2 [Source:MGI Symbol;Acc:MGI:1917511]	34.3333	33.3333	0.333333	0	15.3333		0	#NUM!	0.000345288
Gm36948	9	72440760	72444006	+	Mns1-202	ENSMUSP00000139105	meiosis-specific nuclear structural protein 1 [Source:MGI Symbol;Acc:MGI:107933]	0	8	0.666667	0	7.33333		0	#NUM!	0.0273167
AC122197.1	10	61446902	61450717	-	Eif4ebp2-201	ENSMUSP00000020288	eukaryotic translation initiation factor 4E binding protein 2 [Source:MGI Symbol;Acc:MGI:109198]	2.66667	5	2.33333	0	9		0	#NUM!	0.00999449
AC153938.1	10	96309345	96320725	+	null			3.66667	0.333333	2.33333	0	8		0	#NUM!	0.0169276
Neurod4	10	130268152	130280240	-	Neurod4-201	ENSMUSP00000051379	neurogenic differentiation 4 [Source:MGI Symbol;Acc:MGI:108055]	7	11.3333	0	0	21		0	#NUM!	5.40705e-05
P3h4	11	100408456	100414836	-	P3h4-201	ENSMUSP00000065278	prolyl 3-hydroxylase family member 4 (non- enzymatic) [Source:MGI Symbol;Acc:MGI:1913430]	3	16.3333	1.33333	0	6.33333		0	#NUM!	0.0377854
AC133083.1	12	99639716	99641924	-	null			1.66667	9.66667	0	0	12.3333		0	#NUM!	0.00589338
Ighj2	12	113429514	113429567	-	Ighj2-202	ENSMUSP00000141579	immunoglobulin heavy joining 2 [Source:MGI Symbol;Acc:MGI:4439803]	7	8.66667	0	0	17.3333		0	#NUM!	0.00049094
Ube2ql1	13	69702832	69739889	-	Ube2ql1-201	ENSMUSP00000070906	ubiquitin-conjugating enzyme E2Q family-like 1 [Source:MGI Symbol;Acc:MGI:1924230]	3	2.66667	1.66667	0	12.3333		0	#NUM!	0.00133845
Prlr	15	10177238	10349180	+	Prlr-203	ENSMUSP00000116211	prolactin receptor [Source:MGI Symbol;Acc:MGI:97763]	16.3333	20.6667	0.333333	0	8.33333		0	#NUM!	0.010644
Gm37320	15	68321381	68326333	-	null			4	3	0.666667	0	7		0	#NUM!	0.0286965
Tnfrsf17	16	11313812	11320074	+	Tnfrsf17-201	ENSMUSP00000023140	tumor necrosis factor receptor superfamily, member 17 [Source:MGI Symbol;Acc:MGI:1343050]	9.33333	77	0	0	7.66667		0	#NUM!	0.0189961
Oosp2	19	11647279	11660559	-	Oosp2-202	ENSMUSP00000119198	oocyte secreted protein 2 [Source:MGI Symbol;Acc:MGI:2684945]	7	5.33333	4.66667	0	7.33333		0	#NUM!	0.0177642
Cldn2	X	139800828	139811386	+	Cldn2-201	ENSMUSP00000054219	claudin 2 [Source:MGI Symbol;Acc:MGI:1276110]	12.3333	0	0.666667	0	8		0	#NUM!	0.016258
Jchain	5	88519809	88527891	-	Jchain-201	ENSMUSP00000084259	immunoglobulin joining chain [Source:MGI Symbol;Acc:MGI:96493]	961.667	3154.33	16	107.333	9455.67		0.0113512	-6.46101	2.15968e-20
Nrep	18	33437019	33464029	-	Nrep-201	ENSMUSP00000058132	neuronal regeneration related protein [Source:MGI Symbol;Acc:MGI:99444]	17.3333	6.66667	11.6667	0.333333	26.6667		0.0125	-6.32193	0.000168422
AC133083.2	12	99643093	99647221	+	null			65.3333	299	1.33333	6.33333	466.667		0.0135714	-6.20328	1.74668e-33
Fbxw13	9	109179227	109195975	-	Fbxw13-201	ENSMUSP00000053786	F-box and WD-40 domain protein 13 [Source:MGI Symbol;Acc:MGI:3505590]	0	10.6667	3.66667	0.333333	19		0.0175439	-5.83289	0.00103511
Gm15635	7	99660130	99667500	+	Slco2b1-206	ENSMUSP00000121002	solute carrier organic anion transporter family, member 2b1 [Source:MGI Symbol;Acc:MGI:1351872]	38.6667	61.6667	0.333333	2	80.6667		0.0247934	-5.3339	6.7176e-09
Gm37469	1	165848155	165849044	-	Cd247-206	ENSMUSP00000124297	CD247 antigen [Source:MGI Symbol;Acc:MGI:88334]	8.66667	11	0	0.333333	12.3333		0.027027	-5.20945	0.0223539
Dnaic2	11	114727408	114757889	+	Dnaic2-201	ENSMUSP00000065787	dynein, axonemal, intermediate chain 2 [Source:MGI Symbol;Acc:MGI:2685574]	3.33333	1.33333	0	0.333333	11.6667		0.0285714	-5.12928	0.0106967
Kcnd3	3	105452330	105674002	+	Kcnd3-202	ENSMUSP00000096357	potassium voltage-gated channel, Shal- related family, member 3 [Source:MGI Symbol;Acc:MGI:1928743]	8.66667	0.333333	0	0.333333	11.3333		0.0294118	-5.08746	0.0238052
Grip2	6	91761509	91827250	-	Grip2-205	ENSMUSP00000124709	glutamate receptor interacting protein 2 [Source:MGI Symbol;Acc:MGI:2681173]	2.33333	20	0	0.333333	10.6667		0.03125	-5	0.0217039
Klf15	6	90462576	90475238	+	Klf15-201	ENSMUSP00000032174	Kruppel-like factor 15 [Source:MGI Symbol;Acc:MGI:1929988]	43.3333	53.3333	4.33333	2	50.3333		0.0397351	-4.65344	1.97172e-07
Gm8113	14	43925390	43933411	+	Gm8113-201	ENSMUSP00000125038	predicted gene 8113 [Source:MGI Symbol;Acc:MGI:3648791]	26.3333	54.6667	0.333333	2	50		0.04	-4.64386	1.57839e-07
Lpo	11	87806428	87828289	-	Lpo-201	ENSMUSP00000099466	lactoperoxidase [Source:MGI Symbol;Acc:MGI:1923363]	10	0.333333	20.3333	0.333333	8		0.0416667	-4.58496	0.0472664
Slco2b1	7	99657804	99711340	-	Slco2b1-206	ENSMUSP00000121002	solute carrier organic anion transporter family, member 2b1 [Source:MGI Symbol;Acc:MGI:1351872]	368	629	11.6667	32	747		0.042838	-4.54496	2.1349e-37
Irs1	1	82233101	82291416	-	Gm9747-201	ENSMUSP00000023262	predicted gene 9747 [Source:MGI Symbol;Acc:MGI:3710571]	26.6667	4.33333	0.333333	0.666667	15		0.0444444	-4.49185	0.0156811
Carlr	2	18799245	18801818	-	null			20	0.666667	4.66667	0.666667	13.6667		0.0487805	-4.35755	0.0266142
Eps8l1	7	4460674	4480487	+	Eps8l1-203	ENSMUSP00000133102	EPS8-like 1 [Source:MGI Symbol;Acc:MGI:1914675]	7.33333	311	10.6667	31	630		0.0492063	-4.34501	3.74304e-08
Fbxl16	17	25809085	25821244	+	Fbxl16-201	ENSMUSP00000048562	F-box and leucine-rich repeat protein 16 [Source:MGI Symbol;Acc:MGI:2448488]	8.66667	2.33333	1.33333	0.666667	13.3333		0.05	-4.32193	0.0157988
Cacna1h	17	25374285	25433783	-	Cacna1h-205	ENSMUSP00000125541	calcium channel, voltage-dependent, T type, alpha 1H subunit [Source:MGI Symbol;Acc:MGI:1928842]	37.3333	117.667	3	5.66667	110.667		0.0512048	-4.28758	2.17713e-14
1810059H22Rik	5	148953748	148970122	-	null			3.66667	4	0.333333	0.666667	12.3333		0.0540541	-4.20945	0.0254913
Ccr4	9	114490316	114504916	-	Ccr4-201	ENSMUSP00000062677	chemokine (C-C motif) receptor 4 [Source:MGI Symbol;Acc:MGI:107824]	26.3333	53	5	1.33333	24.3333		0.0547945	-4.18982	0.000394642
Cyp1a1	9	57687928	57703824	+	Cyp1a1-202	ENSMUSP00000150277	cytochrome P450, family 1, subfamily a, polypeptide 1 [Source:MGI Symbol;Acc:MGI:88588]	334.333	28.3333	3.66667	3.66667	62		0.0591398	-4.07973	0.000242838
Kcnj10	1	172341210	172374085	+	Kcnj10-201	ENSMUSP00000054356	potassium inwardly-rectifying channel, subfamily J, member 10 [Source:MGI Symbol;Acc:MGI:1194504]	1777.33	928	65	62	1039.67		0.0596345	-4.06771	9.06357e-13
Rapgef4os2	2	72224688	72232302	-	Rapgef4-202	ENSMUSP00000088336	Rap guanine nucleotide exchange factor (GEF) 4 [Source:MGI Symbol;Acc:MGI:1917723]	7.66667	20	6.66667	3.66667	61.3333		0.0597826	-4.06413	4.95054e-05
Kcnj9	1	172320501	172329318	-	Kcnj9-201	ENSMUSP00000060110	potassium inwardly-rectifying channel, subfamily J, member 9 [Source:MGI Symbol;Acc:MGI:108007]	95	92	2.33333	3	48.6667		0.0616438	-4.0199	1.39272e-06
Zbtb16	9	48654297	48836222	-	Zbtb16-201	ENSMUSP00000091374	zinc finger and BTB domain containing 16 [Source:MGI Symbol;Acc:MGI:103222]	106	125	19	5.66667	90.6667		0.0625	-4	0.000560577
Gm37266	17	51850239	51852525	+	null			10.3333	4	3.66667	1	16		0.0625	-4	0.018096
Dthd1	5	62813823	62888308	+	Dthd1-201	ENSMUSP00000131534	death domain containing 1 [Source:MGI Symbol;Acc:MGI:4937018]	43	25.3333	18.6667	3.66667	57.6667		0.0635838	-3.9752	1.98718e-07
AC144938.1	18	25597490	25603833	+	Celf4-201	ENSMUSP00000025117	CUGBP, Elav-like family member 4 [Source:MGI Symbol;Acc:MGI:1932407]	14	25	0	2.66667	41.6667		0.064	-3.96578	0.000934556
Dkk2	3	132085292	132180304	+	Dkk2-201	ENSMUSP00000029665	dickkopf WNT signaling pathway inhibitor 2 [Source:MGI Symbol;Acc:MGI:1890663]	202.667	27.3333	10	16.6667	258.667		0.064433	-3.95606	4.86387e-26
Ncmap	4	135369576	135398227	-	Ncmap-203	ENSMUSP00000101484	noncompact myelin associated protein [Source:MGI Symbol;Acc:MGI:2444888]	10	9.66667	1.33333	1	14.6667		0.0681818	-3.87447	0.0384329
Gm16537	15	99715543	99724474	-	Gpd1-201	ENSMUSP00000023760	glycerol-3-phosphate dehydrogenase 1 (soluble) [Source:MGI Symbol;Acc:MGI:95679]	23	60.3333	3	3.33333	48		0.0694444	-3.848	2.43116e-07
AC114412.2	12	35672282	35695118	-	null			5.33333	9.66667	6.66667	1.33333	18.3333		0.0727273	-3.78136	0.0066975
Vstm4	14	32856756	32939487	+	Vstm4-201	ENSMUSP00000055178	V-set and transmembrane domain containing 4 [Source:MGI Symbol;Acc:MGI:2444633]	182	231.333	2.66667	5	68.3333		0.0731707	-3.77259	8.16595e-06
Col14a1	15	55307750	55520803	+	Col14a1-201	ENSMUSP00000023053	collagen, type XIV, alpha 1 [Source:MGI Symbol;Acc:MGI:1341272]	44	501.333	1.66667	1	13.6667		0.0731707	-3.77259	0.0246217
Shisa8	15	82206952	82212815	-	Shisa8-201	ENSMUSP00000137002	shisa family member 8 [Source:MGI Symbol;Acc:MGI:2146080]	116	29	128.667	31	422.333		0.0734017	-3.76804	7.40768e-11
Gm30948	12	115262684	115287908	+	null			62.3333	6	7.33333	18.6667	252.333		0.0739762	-3.75679	1.4065e-17
Reln	5	21884454	22344702	-	Reln-207	ENSMUSP00000124052	reelin [Source:MGI Symbol;Acc:MGI:103022]	40.3333	82.3333	2.33333	4.33333	58		0.0747126	-3.7425	1.62975e-07
Gm28424	9	95512151	95513469	+	U2surp-202	ENSMUSP00000078602	U2 snRNP-associated SURP domain containing [Source:MGI Symbol;Acc:MGI:1915208]	11	5.66667	1.66667	1	13.3333		0.075	-3.73697	0.0336545
Hpgd	8	56294585	56321043	+	Hpgd-201	ENSMUSP00000034026	hydroxyprostaglandin dehydrogenase 15 (NAD) [Source:MGI Symbol;Acc:MGI:108085]	537.667	863.333	76.3333	43.6667	572.667		0.0762515	-3.71309	5.56529e-14
Slco1a5	6	142234227	142322981	-	Slco1a5-203	ENSMUSP00000137607	solute carrier organic anion transporter family, member 1a5 [Source:MGI Symbol;Acc:MGI:1351865]	47.3333	0	0.333333	1.66667	20.6667		0.0806452	-3.63227	0.00165079
Gm7097	10	70284235	70284953	-	Slc16a9-201	ENSMUSP00000047912	solute carrier family 16 (monocarboxylic acid transporters), member 9 [Source:MGI Symbol;Acc:MGI:1914109]	82	53.6667	6.33333	6.33333	77.6667		0.0815451	-3.61626	6.41433e-07
2610528A11Rik	14	37102140	37114022	-	2610528A11Rik-201	ENSMUSP00000136426	RIKEN cDNA 2610528A11 gene [Source:MGI Symbol;Acc:MGI:1917295]	32.3333	36.3333	5.33333	14	171.667		0.0815534	-3.61611	6.22871e-06
Cdhr1	14	37077857	37098347	-	Cdhr1-201	ENSMUSP00000022337	cadherin-related family member 1 [Source:MGI Symbol;Acc:MGI:2157782]	31	17	5	10	121.333		0.0824176	-3.6009	1.16714e-07
Cecr2	6	120666369	120771190	+	Cecr2-202	ENSMUSP00000108306	CECR2, histone acetyl-lysine reader [Source:MGI Symbol;Acc:MGI:1923799]	569.333	279.667	83.6667	69	835.667		0.0825688	-3.59826	6.4286e-09
Ccr3	9	124021972	124031689	+	Ccr3-201	ENSMUSP00000039107	chemokine (C-C motif) receptor 3 [Source:MGI Symbol;Acc:MGI:104616]	409.667	1200	67	29	350		0.0828571	-3.59323	6.35165e-06
Gm13889	2	93955810	93957201	-	Gm13889-202	ENSMUSP00000141051	predicted gene 13889 [Source:MGI Symbol;Acc:MGI:3652053]	58.3333	5.33333	18	15.3333	180		0.0851852	-3.55325	2.62121e-07
Arl14	3	69222419	69223618	+	Arl14-201	ENSMUSP00000138370	ADP-ribosylation factor-like 14 [Source:MGI Symbol;Acc:MGI:1918869]	23	7	2	3.33333	39		0.0854701	-3.54844	0.000350487
Hmgcll1	9	76014855	76136350	+	Hmgcll1-201	ENSMUSP00000008052	3-hydroxymethyl-3-methylglutaryl-Coenzyme A lyase-like 1 [Source:MGI Symbol;Acc:MGI:2446108]	20.3333	7	1.33333	2.66667	31		0.0860215	-3.53916	0.000588249
Tssk3	4	129489014	129491022	-	Tssk3-201	ENSMUSP00000000421	testis-specific serine kinase 3 [Source:MGI Symbol;Acc:MGI:1929914]	28	4	10.6667	4.33333	50		0.0866667	-3.52838	4.46321e-05
Rapgef4	2	71981240	72257474	+	Rapgef4-202	ENSMUSP00000088336	Rap guanine nucleotide exchange factor (GEF) 4 [Source:MGI Symbol;Acc:MGI:1917723]	87	254.333	57.3333	53.6667	618.333		0.0867925	-3.52629	6.31508e-14
Scn8a	15	100869858	101045938	+	Scn8a-218	ENSMUSP00000143898	sodium channel, voltage-gated, type VIII, alpha [Source:MGI Symbol;Acc:MGI:103169]	9	7.66667	2	3.33333	37.6667		0.0884956	-3.49825	0.000164053
Pald1	10	61319656	61383530	-	Pald1-201	ENSMUSP00000020289	phosphatase domain containing, paladin 1 [Source:MGI Symbol;Acc:MGI:1351623]	324	299.667	19.6667	26.3333	292		0.0901827	-3.47101	8.02855e-12
Endou	15	97711019	97731405	-	Endou-202	ENSMUSP00000097820	endonuclease, polyU-specific [Source:MGI Symbol;Acc:MGI:97746]	42	108	17.6667	23.3333	258.667		0.0902062	-3.47063	1.88284e-19
CT030182.4	13	37439593	37440454	-	null			6.33333	10.6667	1.33333	6.33333	69.6667		0.0909091	-3.45943	1.21644e-08
Kctd14	7	97451323	97459557	+	Kctd14-206	ENSMUSP00000145558	potassium channel tetramerisation domain containing 14 [Source:MGI Symbol;Acc:MGI:1289222]	181.333	231.667	58	50.6667	551.667		0.0918429	-3.44469	2.28546e-39
Acvr1c	2	58267453	58357895	-	Acvr1c-201	ENSMUSP00000028178	activin A receptor, type IC [Source:MGI Symbol;Acc:MGI:2661081]	47	3.66667	12.6667	5.33333	58		0.091954	-3.44294	4.93465e-05
Hey1	3	8663359	8667256	-	Hey1-201	ENSMUSP00000038014	hairy/enhancer-of-split related with YRPW motif 1 [Source:MGI Symbol;Acc:MGI:1341800]	29.3333	53	8.66667	7	75.3333		0.0929204	-3.42786	4.12072e-09
Dnajc22	15	99093170	99104737	+	Dnajc22-201	ENSMUSP00000055482	DnaJ heat shock protein family (Hsp40) member C22 [Source:MGI Symbol;Acc:MGI:1920028]	22.6667	20.3333	13.3333	3.66667	39.3333		0.0932203	-3.42321	2.2743e-05
Gm20465	5	33293614	33311150	-	null			21.3333	2.33333	26.3333	2.33333	25		0.0933333	-3.42146	0.000746
Dgki	6	36846022	37300184	-	Dgki-203	ENSMUSP00000099071	diacylglycerol kinase, iota [Source:MGI Symbol;Acc:MGI:2443430]	290.667	140.667	23.6667	14	150		0.0933333	-3.42146	2.3314e-06
Itgb8	12	119158022	119238802	-	Itgb8-201	ENSMUSP00000026360	integrin beta 8 [Source:MGI Symbol;Acc:MGI:1338035]	280.667	16	37	45.3333	474		0.0956399	-3.38624	1.10213e-10
Rgl3	9	21968711	21989446	-	Rgl3-204	ENSMUSP00000148965	ral guanine nucleotide dissociation stimulator-like 3 [Source:MGI Symbol;Acc:MGI:1918996]	73.6667	42.3333	6.33333	8	82.3333		0.097166	-3.3634	1.54613e-08
Mmp13	9	7272514	7283331	+	Mmp13-201	ENSMUSP00000015394	matrix metallopeptidase 13 [Source:MGI Symbol;Acc:MGI:1340026]	434.667	142	40	93.6667	957		0.0978753	-3.35291	2.6613e-11
Cmbl	15	31568791	31590119	+	Cmbl-203	ENSMUSP00000125296	carboxymethylenebutenolidase-like (Pseudomonas) [Source:MGI Symbol;Acc:MGI:1916824]	120.667	181.333	4.66667	10.3333	105		0.0984127	-3.34501	4.76519e-07
Kcnj16	11	110968033	111027968	+	Kcnj16-202	ENSMUSP00000102247	potassium inwardly-rectifying channel, subfamily J, member 16 [Source:MGI Symbol;Acc:MGI:1314842]	231.667	468	5.66667	16.6667	169.333		0.0984252	-3.34483	1.13878e-11
Gad1	2	70553072	70602014	+	Gad1-201	ENSMUSP00000092539	glutamate decarboxylase 1 [Source:MGI Symbol;Acc:MGI:95632]	40	61.3333	6	9.33333	94.6667		0.0985915	-3.34239	1.06107e-07
Hs3st2	7	121391859	121501770	+	Hs3st2-202	ENSMUSP00000146027	heparan sulfate (glucosamine) 3-O- sulfotransferase 2 [Source:MGI Symbol;Acc:MGI:1333802]	52.6667	170.667	2	2.33333	23.6667		0.0985916	-3.34239	0.00246292
Gm17096	2	166943539	166944308	+	Cse1l-201	ENSMUSP00000002790	chromosome segregation 1-like (S. cerevisiae) [Source:MGI Symbol;Acc:MGI:1339951]	10.6667	27.3333	5	1.66667	16.6667		0.1	-3.32193	0.0159716
Gm42602	5	96879518	96882741	+	null			82	3.66667	13.3333	6.33333	63		0.100529	-3.31431	0.000165949
AC166078.2	9	83008603	83042603	+	null			3.33333	15	3.33333	3.66667	36.3333		0.100917	-3.30875	9.25563e-05
Oosp1	19	11667460	11691150	-	Oosp1-201	ENSMUSP00000036529	oocyte secreted protein 1 [Source:MGI Symbol;Acc:MGI:2149290]	41.3333	88	66	4	38		0.105263	-3.24793	0.00236784
Gm8378	12	91674812	91686113	-	Ston2-201	ENSMUSP00000053908	stonin 2 [Source:MGI Symbol;Acc:MGI:1918272]	32	0.666667	0.666667	2.66667	25		0.106667	-3.22882	0.0117844
Gm26702	2	25575431	25580099	+	Gm996-201	ENSMUSP00000109855	predicted gene 996 [Source:MGI Symbol;Acc:MGI:2685842]	32.3333	60.6667	3.66667	3	28		0.107143	-3.22239	0.00376252
Gm12979	4	129491969	129509746	-	Fam229a-201	ENSMUSP00000101658	family with sequence similarity 229, member A [Source:MGI Symbol;Acc:MGI:1915483]	19.6667	1.66667	8	4	37.3333		0.107143	-3.22239	0.0243945
Tmem37	1	120067377	120074074	-	Tmem37-201	ENSMUSP00000050862	transmembrane protein 37 [Source:MGI Symbol;Acc:MGI:2157899]	186.333	165.667	29.6667	31	288.667		0.10739	-3.21906	1.85349e-17
Gm1720	X	166662025	166689812	+	null			17	4.66667	0.333333	2.33333	21.6667		0.107692	-3.21501	0.0122672
Ank2	3	126921612	127499350	-	Ank2-209	ENSMUSP00000138323	ankyrin 2, brain [Source:MGI Symbol;Acc:MGI:88025]	127	84	11	12	111		0.108108	-3.20945	0.000109481
Gm26789	10	63292286	63295793	-	Herc4-201	ENSMUSP00000020258	hect domain and RLD 4 [Source:MGI Symbol;Acc:MGI:1914595]	28.3333	15	4	4	36.3333		0.110092	-3.18322	0.0342459
Klrb1	6	128705836	128723059	-	Klrb1-201	ENSMUSP00000107738	killer cell lectin-like receptor subfamily B member 1 [Source:MGI Symbol;Acc:MGI:96877]	15.3333	77.6667	0.666667	3	27		0.111111	-3.16993	0.00181083
Micalcl	7	112368308	112413106	+	AC132392.1-202	ENSMUSP00000149026	No description	22.3333	17.6667	3.33333	3	27		0.111111	-3.16993	0.00356452
Adrb1	19	56722372	56724862	+	Adrb1-201	ENSMUSP00000040847	adrenergic receptor, beta 1 [Source:MGI Symbol;Acc:MGI:87937]	60	241.333	7.33333	8.66667	78		0.111111	-3.16992	1.27904e-06
Gm45694	8	71983903	71987153	+	Cyp4f18-201	ENSMUSP00000003574	cytochrome P450, family 4, subfamily f, polypeptide 18 [Source:MGI Symbol;Acc:MGI:1919304]	16.6667	27.3333	4	4	35.3333		0.113208	-3.14296	0.00103806
Kcnh6	11	106008124	106034549	+	Kcnh6-202	ENSMUSP00000102516	potassium voltage-gated channel, subfamily H (eag-related), member 6 [Source:MGI Symbol;Acc:MGI:2684139]	56.6667	4.66667	0	2	17.6667		0.113208	-3.14296	0.0425741
B3galt5	16	96235801	96319859	+	B3galt5-202	ENSMUSP00000109431	UDP-Gal:betaGlcNAc beta 1,3- galactosyltransferase, polypeptide 5 [Source:MGI Symbol;Acc:MGI:2136878]	43.6667	52	3.66667	3.66667	32.3333		0.113402	-3.14048	0.0116349
Serpine1	5	137061504	137072268	-	Serpine1-201	ENSMUSP00000039586	serine (or cysteine) peptidase inhibitor, clade E, member 1 [Source:MGI Symbol;Acc:MGI:97608]	292	454.333	29	45.3333	399.667		0.113428	-3.14015	4.41329e-07
Ptprm	17	66666947	67354457	-	Ptprm-201	ENSMUSP00000045603	protein tyrosine phosphatase, receptor type, M [Source:MGI Symbol;Acc:MGI:102694]	530.333	399.333	46.3333	70	616.333		0.113575	-3.13828	3.01004e-08
Gm996	2	25575416	25581757	-	Gm996-201	ENSMUSP00000109855	predicted gene 996 [Source:MGI Symbol;Acc:MGI:2685842]	33	61.3333	3.66667	3.33333	29.3333		0.113636	-3.1375	0.00209511
Fcer2a	8	3681737	3694175	-	Fcer2a-201	ENSMUSP00000005678	Fc receptor, IgE, low affinity II, alpha polypeptide [Source:MGI Symbol;Acc:MGI:95497]	805.667	1291.33	451	577	5059		0.114054	-3.13221	1.86529e-19
Gm13709	2	73370909	73379297	+	Gpr155-202	ENSMUSP00000075788	G protein-coupled receptor 155 [Source:MGI Symbol;Acc:MGI:1915776]	4.66667	18	5.33333	3.33333	29		0.114943	-3.12102	0.00653542
Rapgef3	15	97744770	97767972	-	Rapgef3-203	ENSMUSP00000116426	Rap guanine nucleotide exchange factor (GEF) 3 [Source:MGI Symbol;Acc:MGI:2441741]	46.6667	60.6667	33.6667	22.3333	194		0.11512	-3.11879	1.71379e-14
Gpd1	15	99717515	99725005	+	Gpd1-201	ENSMUSP00000023760	glycerol-3-phosphate dehydrogenase 1 (soluble) [Source:MGI Symbol;Acc:MGI:95679]	146	382.667	15.6667	34.6667	299.333		0.115813	-3.11013	1.37712e-14
Gm42979	5	129556147	129558374	+	Sfswap-201	ENSMUSP00000062413	splicing factor, suppressor of white-apricot homolog (Drosophila) [Source:MGI Symbol;Acc:MGI:101760]	72.3333	39	9	6	51.3333		0.116883	-3.09686	0.00575944
[truncated: 2,336 more rows]

## Sheet: Table S3 Dox-regulated genes
Table 3: Genes altered by re-expression of IRF4 in IRF4-/- cells by DESeq2 using FDR<0.05
[truncated: 1,402 more rows]

## Sheet: Table S4 TFs in CPT reg genes
Table 4: Transcription Factor Network List from CPT-dependent genes
[truncated: 21 more rows]

[truncated: 12 more sheets: Table S5 TFs from IRF4KO, Table S6 TFs from DOX reg genes, Table S7 CPT-IRF4KO genes, Table S8 KO-DOX genes, Table S9 CPT-IRF4KO-DOX genes, Table S10 TFs in common genes, Table S11 Enrichment analysis, Table S12 Common secreted, Table S13 Common membrane, Table S14 ATACseq results, Table S15 ChIPseq datasets, Table S16 IRF4 Super Enhancers]
